# Supplementary material for: Hyperosmotic Stress Induces a Specific Pattern for Stress Granule Formation in Human-Induced Pluripotent Stem Cells
Source: Hindawi journal article supplement (doi:10.1155/2021/8274936), 2021-10-15
Supplement: f1 [file 8274936.f1.zip]

Supplementary Table 2: List of identified proteins - Mass Spectrometry–Based Protein Quantitation:

|    | UniProt AC/ID | Gene name | Protein name      | Majority protein IDs: Fasta headers | Peptides | Sequence coverage [%] | IMR90-1[200mM vs NT] log2 ratio | IMR90-1[200mM vs NT] p-value | IMR90-1[200mM vs NT] FDR | IMR90-1[400mM vs NT] log2 ratio | IMR90-1[400mM vs NT] p-value | IMR90-1[400mM vs NT] FDR | Peptides | Sequence coverage [%] | SHSy5y[20 0mM vs NT] log2 ratio | SHSy5y[20 0mM vs NT] p-value | SHSy5y[2 00mM vs NT] FDR | SHSy5y[40 0mM vs NT] log2 ratio | SHSy5y[40 0mM vs NT] p-value | SHSy5y[4 00mM vs NT] FDR | FCM cluster |
|----|---------------|-----------|-------------------|-------------------------------------|----------|-----------------------|---------------------------------|------------------------------|--------------------------|---------------------------------|------------------------------|--------------------------|----------|-----------------------|---------------------------------|------------------------------|--------------------------|---------------------------------|------------------------------|--------------------------|-------------|
| 1  | P0DPI2        | GATD3A    | Glutamine amid    | sp P0DPI2 GAL3A_HUMAN               | 3        | 17.5                  | -0.01067                        | 0.97378                      | 0.999                    | 0.5892                          | 0.97378                      | 0.99899                  | 4        | 25                    | NA                              | NA                           | NA                       | NA                              | NA                           | NA                       | NA          |
| 2  | P68036        | UBE2L3    | Ubiquitin-conjug  | sp P68036 UB2L3_HUMAN               | 2        | 10.4                  | -0.072379                       | 0.85246                      | 0.9991                   | -0.7607                         | 0.06409                      | 0.20018                  | 8        | 65.6                  | -0.0669                         | 0.86359                      | 0.9973                   | -0.221                          | 0.5718                       | 0.6636                   | NA          |
| 3  | A0AVT1        | UBA6      | Ubiquitin-like m  | sp A0AVT1 UBA6_HUMAN                | 5        | 5.4                   | 0.5623468                       | NA                           | NA                       | NA                              | NA                           | NA                       | 10       | 11                    | NA                              | NA                           | NA                       | NA                              | NA                           | NA                       | NA          |
| 4  | A5YKK6        | CNOT1     | CCR4-NOT trans    | sp A5YKK6 CNOT1_HUMA                | 6        | 2.9                   | -0.128986                       | 0.59636                      | 0.9984                   | 0.1993                          | 0.59636                      | 0.99836                  | 8        | 4                     | 0.31491                         | NA                           | NA                       | NA                              | NA                           | NA                       | NA          |
| 5  | A6NDG6        | PGP       | Glycerol-3-phosp  | sp A6NDG6 PGP_HUMAN                 | 2        | 9                     | 0.0593401                       | 0.88556                      | 0.9991                   | -0.4489                         | 0.3839                       | 0.593                    | 6        | 27.4                  | 0.21431                         | 0.62618                      | 0.9973                   | 0.88831                         | 0.053                        | 0.0916                   | NA          |
| 6  | A8MPP1        | DDX11L8   | Putative ATP-de   | sp A8MPP1 D11L8_HUMA                | 2        | 2.2                   | -0.103113                       | NA                           | NA                       | NA                              | NA                           | NA                       | 1        | 1.3                   | NA                              | NA                           | NA                       | NA                              | NA                           | NA                       | NA          |
| 7  | Q99613        | EIF3C     | Eukaryotic trans  | sp Q99613 EIF3C_HUMAN               | 10       | 15.4                  | 0.0305203                       | 0.87519                      | 0.9991                   | -0.2883                         | 0.19671                      | 0.37977                  | 17       | 25.1                  | 0.02772                         | 0.88657                      | 0.9973                   | -0.2989                         | 0.1381                       | 0.2057                   | NA          |
| 8  | E9PAV3        | NACA      | Nascent polypep   | sp E9PAV3 NACAM_HUM                 | 6        | 5.1                   | 0.2180141                       | 0.31103                      | 0.9991                   | -0.3311                         | 0.13152                      | 0.29758                  | 5        | 3.4                   | 0.06699                         | 0.7521                       | 0.9973                   | -0.9268                         | 0.0004                       | 0.0015                   | 4           |
| 9  | O00116        | AGPS      | Alkylidihydroxya  | sp O00116 ADAS_HUMAN                | 3        | 7                     | 0.0689567                       | 0.75027                      | 0.9984                   | 0.5677                          | 0.75027                      | 0.99836                  | 4        | 7.8                   | NA                              | NA                           | NA                       | NA                              | NA                           | NA                       | NA          |
| 10 | O00139        | KIF2A     | Kinesin-like prot | sp O00139 KIF2A_HUMAN               | 1        | 1.4                   | NA                              | NA                           | NA                       | NA                              | NA                           | NA                       | 6        | 7.4                   | NA                              | NA                           | NA                       | 0.40057                         | NA                           | NA                       | NA          |
| 11 | O00148        | DDX39A    | ATP-dependent     | sp O00148 DX39A_HUMA                | 7        | 17.3                  | NA                              | NA                           | NA                       | NA                              | NA                           | NA                       | 10       | 26.5                  | -0.9957                         | 0.07611                      | 0.9991                   | -1.5615                         | 0.0761                       | 0.9991                   | NA          |
| 12 | O00151        | PDUM1     | PDZ and LIM dom   | sp O00151 PDL1_HUMAN                | 11       | 53.5                  | 0.0308367                       | 0.9091                       | 0.9987                   | -0.8939                         | 0.9091                       | 0.99874                  | NA       | NA                    | NA                              | NA                           | NA                       | NA                              | NA                           | NA                       | NA          |
| 13 | O00154        | ACOT7     | Cytosolic acyl co | sp O00154 BACH_HUMAN                | 7        | 24.5                  | -0.021402                       | 0.91913                      | 0.9991                   | -0.8517                         | 0.00218                      | 0.02915                  | 8        | 25.5                  | 0.18385                         | 0.38892                      | 0.9973                   | -0.6151                         | 0.0094                       | 0.0209                   | 3           |
| 14 | O00159        | MYO1C     | Unconventional    | sp O00159 MYO1C_HUMA                | 1        | 1.1                   | NA                              | NA                           | NA                       | NA                              | NA                           | NA                       | 4        | 5.6                   | 0.04983                         | NA                           | NA                       | NA                              | NA                           | NA                       | NA          |
| 15 | O00161        | SNAP23    | Synaptosomal-as   | sp O00161 SNP23_HUMAN               | 4        | 26.5                  | -0.184451                       | 0.39312                      | 0.9984                   | 0.2686                          | 0.39312                      | 0.99836                  | 4        | 25.6                  | NA                              | NA                           | NA                       | NA                              | NA                           | NA                       | NA          |
| 16 | O00178        | GTPBP1    | GTP-binding prot  | sp O00178 GTPB1_HUMAN               | 2        | 4.2                   | 0.6726262                       | NA                           | NA                       | NA                              | NA                           | NA                       | 3        | 7.3                   | -0.0401                         | NA                           | NA                       | NA                              | NA                           | NA                       | NA          |
| 17 | O00193        | SMAP      | Small acidic prot | sp O00193 SMAP_HUMAN                | 4        | 26.8                  | 0.2231981                       | 0.57467                      | 0.9991                   | -0.7326                         | 0.07808                      | 0.22519                  | 5        | 30.1                  | -0.0456                         | 0.90819                      | 0.9973                   | 0.27794                         | 0.4858                       | 0.577                    | NA          |
| 18 | O00203        | AP3B1     | AP-3 complex su   | sp O00203 AP3B1_HUMAN               | 6        | 5.4                   | 0.039985                        | 0.88096                      | 0.9984                   | -0.1642                         | 0.88096                      | 0.99836                  | 5        | 4.8                   | 0.1565                          | NA                           | NA                       | NA                              | NA                           | NA                       | NA          |
| 19 | O00231        | PSMD11    | 26S proteasome    | sp O00231 PSD11_HUMAN               | 13       | 34.6                  | 0.0403358                       | 0.8546                       | 0.9991                   | -0.3547                         | 0.12067                      | 0.2853                   | 18       | 47.4                  | -0.0953                         | 0.66581                      | 0.9973                   | -0.8156                         | 0.0016                       | 0.0048                   | 4           |
| 20 | O00232        | PSMD12    | 26S proteasome    | sp O00232 PSD12_HUMA                | 13       | 31.8                  | -0.09887                        | 0.61093                      | 0.9991                   | -0.1674                         | 0.39265                      | 0.60102                  | 11       | 30.5                  | -0.1836                         | 0.34954                      | 0.9973                   | -0.8136                         | 0.0006                       | 0.002                    | 4           |
| 21 | O00264        | PGRMC1    | Membrane-asso     | sp O00264 PGRC1_HUMAN               | 6        | 39.5                  | -0.093844                       | 0.66702                      | 0.9984                   | 0.2744                          | 0.66702                      | 0.99836                  | 3        | 15.9                  | NA                              | NA                           | NA                       | NA                              | NA                           | NA                       | NA          |
| 22 | O00267        | SPT5H     | Transcription el  | sp O00267 SPT5H_HUMAN               | 6        | 8.5                   | -0.431586                       | NA                           | NA                       | NA                              | NA                           | NA                       | 10       | 14.5                  | -0.0749                         | NA                           | NA                       | NA                              | NA                           | NA                       | NA          |
| 23 | O00291        | HIP1      | Huntingtin-inter  | sp O00291 HIP1_HUMAN                | 1        | 1                     | NA                              | NA                           | NA                       | NA                              | NA                           | NA                       | 2        | 1.9                   | -0.4216                         | NA                           | NA                       | NA                              | NA                           | NA                       | NA          |
| 24 | O00299        | CLIC1     | Chloride intrace  | sp O00299 CLIC1_HUMAN               | 7        | 41.1                  | -0.115637                       | 0.64071                      | 0.9991                   | -0.5719                         | 0.03152                      | 0.12742                  | 11       | 61                    | -0.0699                         | 0.77732                      | 0.9973                   | -0.978                          | 0.0009                       | 0.0031                   | 4           |
| 25 | O00303        | EIF3F     | Eukaryotic trans  | sp O00303 EIF3F_HUMAN               | 10       | 39.2                  | -0.593628                       | 0.11019                      | 0.9991                   | -0.6821                         | 0.06974                      | 0.21129                  | 12       | 46.5                  | 0.36525                         | 0.31383                      | 0.9973                   | 0.24787                         | 0.4906                       | 0.5797                   | NA          |
| 26 | O00410        | IPO5      | Importin-5        | sp O00410 IPO5_HUMAN                | 20       | 24.8                  | -0.146389                       | 0.52978                      | 0.9991                   | -0.3941                         | 0.10275                      | 0.26882                  | 29       | 35.1                  | -0.1088                         | 0.63952                      | 0.9973                   | 0.60338                         | 0.0174                       | 0.0357                   | 2           |
| 27 | O00422        | SAP18     | Histone deacety   | sp O00422 SAP18_HUMAN               | 4        | 26.1                  | 0.448963                        | 0.26393                      | 0.9984                   | 0.8126                          | 0.26393                      | 0.99836                  | 5        | 41.2                  | 0.36161                         | NA                           | NA                       | NA                              | NA                           | NA                       | NA          |
| 28 | O00425        | IGF2BP3   | Insulin-like grow | sp O00425 IF2B3_HUMAN               | 17       | 35.8                  | 0.2157527                       | 0.28884                      | 0.9984                   | 0.55                            | 0.28884                      | 0.99836                  | 12       | 30.1                  | NA                              | NA                           | NA                       | NA                              | NA                           | NA                       | NA          |
| 29 | O00429        | DNM1L     | Dynamin-1-like    | sp O00429 DNM1L_HUMA                | 3        | 4.6                   | NA                              | NA                           | NA                       | NA                              | NA                           | NA                       | 12       | 23.8                  | 0.00071                         | 0.99743                      | 0.9999                   | 0.02414                         | 0.9974                       | 0.9999                   | NA          |
| 30 | O00483        | NDUFA4    | Cytochrome c ox   | sp O00483 NDUA4_HUMA                | 2        | 22.2                  | 0.0063321                       | 0.98127                      | 0.999                    | 0.4623                          | 0.98127                      | 0.99899                  | 2        | 22.2                  | 0.02853                         | NA                           | NA                       | NA                              | NA                           | NA                       | NA          |
| 31 | O00487        | PSMD14    | 26S proteasome    | sp O00487 PSDE_HUMAN                | 5        | 24.8                  | 0.2898981                       | 0.33089                      | 0.9991                   | 0.6663                          | 0.0347                       | 0.13592                  | 8        | 43.2                  | 0.0384                          | 0.89602                      | 0.9973                   | -1.3511                         | 0.0002                       | 0.001                    | 5           |
| 32 | O00505        | KPNA3     | Importin subunit  | sp O00505 IMA4_HUMAN                | 6        | 14.8                  | 0.3612311                       | 0.28521                      | 0.9991                   | -0.1797                         | 0.62918                      | 0.77581                  | 8        | 22.6                  | 0.0473                          | 0.88659                      | 0.9973                   | -0.5211                         | 0.1305                       | 0.1962                   | NA          |
| 33 | O00566        | MPHOSPH10 | U3 small nucleol  | sp O00566 MPP10_HUMA                | 4        | 10.3                  | -0.039822                       | 0.86965                      | 0.9984                   | 0.4688                          | 0.86965                      | 0.99836                  | 5        | 13.1                  | NA                              | NA                           | NA                       | NA                              | NA                           | NA                       | NA          |
| 34 | O00567        | NOP56     | Nucleolar protei  | sp O00567 NOP56_HUMA                | 9        | 21.2                  | 0.0765002                       | 0.79288                      | 0.9991                   | 0.8977                          | 0.0063                       | 0.04962                  | 11       | 20.4                  | 0.15822                         | 0.5884                       | 0.9973                   | -0.9917                         | 0.0031                       | 0.0084                   | 5           |
| 35 | O00571        | DDX3X     | ATP-dependent     | sp O00571 DDX3X_HUMA                | 10       | 19.5                  | -0.057922                       | 0.78227                      | 0.9991                   | -0.1701                         | 0.42133                      | 0.61339                  | 18       | 30.7                  | -0.0516                         | 0.80532                      | 0.9973                   | -1.3786                         | #####                        | #####                    | 4           |
| 36 | O00592        | PODXL     | Podocalyxin       | sp O00592 PODXL_HUMA                | 7        | 18.6                  | -0.02306                        | 0.90834                      | 0.9987                   | 0.4651                          | 0.90834                      | 0.99874                  | NA       | NA                    | NA                              | NA                           | NA                       | NA                              | NA                           | NA                       | NA          |
| 37 | O00629        | KPNA4     | Importin subunit  | sp O00629 IMA3_HUMAN                | 4        | 10.2                  | 0.1122849                       | 0.76103                      | 0.9991                   | -0.1051                         | 0.84034                      | 0.91735                  | 4        | 11.5                  | -0.3327                         | 0.42507                      | 0.9973                   | -0.1973                         | 0.6335                       | 0.7163                   | NA          |
| 38 | O00767        | SCD       | Acyl-CoA desatu   | sp O00767 ACOD_HUMAN                | 5        | 16.4                  | -0.03674                        | 0.90083                      | 0.9984                   | 0.8439                          | 0.90083                      | 0.99836                  | 1        | 3.6                   | NA                              | NA                           | NA                       | NA                              | NA                           | NA                       | NA          |
| 39 | O14561        | NDUFAB1   | Acyl carrier prot | sp O14561 ACPM_HUMAN                | 2        | 15.4                  | -0.315037                       | 0.28504                      | 0.9991                   | 0.2361                          | 0.45973                      | 0.6439                   | 3        | 15.4                  | 0.04478                         | 0.86239                      | 0.9973                   | -0.4341                         | 0.1086                       | 0.1689                   | NA          |
| 40 | P47813        | EIF1AX    | Eukaryotic trans  | sp P47813 IF1AX_HUMAN               | 3        | 19.4                  | 0.7805285                       | 0.16742                      | 0.9991                   | 0.1354                          | 0.82061                      | 0.91051                  | 4        | 31.2                  | 0.22196                         | 0.64999                      | 0.9973                   | 0.15072                         | 0.7823                       | 0.8217                   | NA          |
| 41 | O14646        | CHD1      | Chromodomain-f    | sp O14646 CHD1_HUMAN                | 3        | 3.1                   | 0.2243422                       | 0.52307                      | 0.9984                   | 0.1558                          | 0.52307                      | 0.99836                  | NA       | NA                    | NA                              | NA                           | NA                       | NA                              | NA                           | NA                       | NA          |
| 42 | O14737        | PDCD5     | Programmed cel    | sp O14737 PDCD5_HUMA                | 4        | 36                    | 0.4146889                       | 0.1885                       | 0.9991                   | -0.0642                         | 0.83428                      | 0.91706                  | 7        | 53.6                  | -0.0396                         | 0.8973                       | 0.9973                   | 0.9864                          | 0.0048                       | 0.012                    | 2           |
| 43 | O14745        | SLC9A3R1  | Na(+)/H(+) excha  | sp O14745 NHRF1_HUMA                | 10       | 34.9                  | -0.067809                       | 0.72679                      | 0.9984                   | -0.1385                         | 0.72679                      | 0.99836                  | 6        | 20.7                  | NA                              | NA                           | NA                       | NA                              | NA                           | NA                       | NA          |
| 44 | O14776        | TCERG1    | Transcription el  | sp O14776 TCRG1_HUMAN               | 5        | 6                     | 0.5946413                       | 0.01113                      | 0.9991                   | 0.7794                          | 0.00424                      | 0.03852                  | 6        | 6.6                   | 0.93458                         | 0.00851                      | 0.7846                   | 0.33323                         | 0.2596                       | 0.3433                   | 1           |

|    |        |          |                   |                       |    |      |           |         |        |         |         |         |    |      |         |         |        |         |        |        |    |
|----|--------|----------|-------------------|-----------------------|----|------|-----------|---------|--------|---------|---------|---------|----|------|---------|---------|--------|---------|--------|--------|----|
| 45 | O14818 | PSMA7    | Proteasome sub    | sp O14818 PSA7_HUMAN  | 7  | 37.5 | 0.2341068 | 0.26339 | 0.9991 | -0.233  | 0.26563 | 0.46617 | 9  | 41.5 | -0.075  | 0.71544 | 0.9973 | 0.70054 | 0.0031 | 0.0084 | 2  |
| 46 | O14929 | HAT1     | Histone acetyltr  | sp O14929 HAT1_HUMAN  | 4  | 14.3 | 0.3388175 | NA      | NA     | NA      | NA      | NA      | 4  | 11.2 | -0.1997 | 0.3837  | 0.9991 | -0.711  | 0.3837 | 0.9991 | NA |
| 47 | P19105 | MYL12A   | Myosin regulato   | sp P19105 ML12A_HUMAN | 3  | 22.8 | -0.311614 | 0.55686 | 0.9991 | -0.3831 | 0.5103  | 0.68136 | 9  | 59.1 | 0.25252 | 0.59413 | 0.9973 | 0.59523 | 0.2193 | 0.3042 | NA |
| 48 | O14964 | HGS      | Hepatocyte gro    | sp O14964 HGS_HUMAN   | 2  | 2.6  | -0.366268 | NA      | NA     | NA      | NA      | NA      | 4  | 6.4  | 0.13521 | 0.67887 | 0.9991 | -1.0201 | 0.6789 | 0.9991 | NA |
| 49 | O14974 | PPP1R12A | Protein phosphat  | sp O14974 MYPT1_HUMAN | 5  | 6.1  | 0.1777187 | NA      | NA     | NA      | NA      | NA      | 11 | 13.6 | 0.00567 | 0.98645 | 0.9991 | -0.8464 | 0.9864 | 0.9991 | NA |
| 50 | O14979 | HNRNPDL  | Heterogeneous     | sp O14979 HNRDL_HUMAN | 7  | 16.9 | 0.4098684 | 0.21037 | 0.9991 | 0.3604  | 0.26802 | 0.46919 | 9  | 20.7 | -0.5146 | 0.1623  | 0.9973 | 2.1266  | #####  | 0.0001 | 1  |
| 51 | O14980 | XPO1     | Exportin-1        | sp O14980 XPO1_HUMAN  | 15 | 16.9 | 0.2251771 | 0.32763 | 0.9991 | -0.7347 | 0.00448 | 0.04022 | 22 | 26.2 | 0.16353 | 0.47403 | 0.9973 | 0.25463 | 0.2703 | 0.3554 | 2  |
| 52 | O15042 | U2SURP   | U2 snRNP-associ   | sp O15042 SR140_HUMAN | 4  | 5.4  | -0.127157 | NA      | NA     | NA      | NA      | NA      | 6  | 7.8  | 0.53825 | NA      | NA     | NA      | NA     | NA     | NA |
| 53 | O15067 | PFAS     | Phosphoribosylf   | sp O15067 PUR4_HUMAN  | 6  | 7.5  | -0.202859 | 0.5233  | 0.9984 | -0.3697 | 0.5233  | 0.99836 | 9  | 10.4 | NA      | NA      | NA     | NA      | NA     | NA     | NA |
| 54 | O15143 | ARPC1B   | Actin-related pr  | sp O15143 ARC1B_HUMAN | 2  | 8.3  | NA        | NA      | NA     | NA      | NA      | NA      | 6  | 23.4 | -0.4862 | 0.08543 | 0.9991 | -0.2621 | 0.0854 | 0.9991 | NA |
| 55 | O15144 | ARPC2    | Actin-related pr  | sp O15144 ARPC2_HUMAN | 7  | 24.7 | 0.1211492 | 0.48482 | 0.9991 | -0.3264 | 0.07168 | 0.21444 | 10 | 43   | 0.12153 | 0.48347 | 0.9973 | -0.9171 | #####  | 0.0003 | 4  |
| 56 | O15145 | ARPC3    | Actin-related pr  | sp O15145 ARPC3_HUMAN | 1  | 7.3  | NA        | NA      | NA     | NA      | NA      | NA      | 4  | 35.4 | 0.75477 | NA      | NA     | NA      | NA     | NA     | NA |
| 57 | O15155 | BET1     | BET1 homolog      | sp O15155 BET1_HUMAN  | 2  | 24.6 | NA        | NA      | NA     | NA      | NA      | NA      | 2  | 24.6 | 0.21572 | 0.5816  | 0.9991 | 0.39843 | 0.5816 | 0.9991 | NA |
| 58 | O15212 | PFDN6    | Prefoldin subuni  | sp O15212 PFD6_HUMAN  | 3  | 26.4 | 0.2872452 | 0.54796 | 0.9991 | -1.2398 | 0.0683  | 0.20962 | 5  | 43.4 | 0.03375 | 0.93666 | 0.9973 | 2.92207 | #####  | #####  | 2  |
| 59 | O15347 | HMGB3    | High mobility gr  | sp O15347 HMGB3_HUMAN | 5  | 24   | -0.18542  | 0.54707 | 0.9984 | -0.9113 | 0.54707 | 0.99836 | 4  | 20   | NA      | NA      | NA     | NA      | NA     | NA     | NA |
| 60 | O15355 | PPM1G    | Protein phosphat  | sp O15355 PPM1G_HUMAN | 10 | 28.9 | -0.104997 | 0.70061 | 0.9991 | -0.4056 | 0.1497  | 0.32163 | 18 | 52   | -0.0597 | 0.82657 | 0.9973 | 1.03004 | 0.0014 | 0.0043 | 2  |
| 61 | O15371 | EIF3D    | Eukaryotic trans  | sp O15371 EIF3D_HUMAN | 9  | 18.6 | -0.129779 | 0.67035 | 0.9991 | -1.01   | 0.00377 | 0.03699 | 13 | 27.7 | -0.1291 | 0.67197 | 0.9973 | -0.8741 | 0.0099 | 0.0218 | 3  |
| 62 | O15372 | EIF3H    | Eukaryotic trans  | sp O15372 EIF3H_HUMAN | 8  | 30.1 | 0.2121387 | 0.47509 | 0.9991 | -0.2283 | 0.44273 | 0.62905 | 10 | 35.8 | -0.0483 | 0.86971 | 0.9973 | -0.8082 | 0.013  | 0.0277 | 4  |
| 63 | O15498 | YKT6     | Synaptobrevin h   | sp O15498 YKT6_HUMAN  | 4  | 22.2 | 0.0240236 | 0.95448 | 0.9991 | -0.7739 | 0.15611 | 0.33039 | 8  | 47.5 | 0.29603 | 0.56919 | 0.9973 | 2.42322 | #####  | 0.0005 | 2  |
| 64 | O15511 | ARPC5    | Actin-related pr  | sp O15511 ARPC5_HUMAN | 3  | 24.5 | NA        | NA      | NA     | NA      | NA      | NA      | 5  | 49   | 0.39458 | 0.14647 | 0.9991 | -0.5533 | 0.1465 | 0.9991 | NA |
| 65 | O43143 | DHX15    | Pre-mRNA-splicin  | sp O43143 DHX15_HUMAN | 13 | 19.9 | 0.1861896 | 0.40294 | 0.9991 | 0.3081  | 0.22193 | 0.41407 | 22 | 32.6 | -0.1468 | 0.50786 | 0.9973 | 0.48028 | 0.042  | 0.0744 | 1  |
| 66 | O43169 | CYB5B    | Cytochrome b5 t   | sp O43169 CYB5B_HUMAN | 5  | 35.6 | -0.093222 | 0.74483 | 0.9984 | 0.4986  | 0.74483 | 0.99836 | 4  | 50.7 | NA      | NA      | NA     | NA      | NA     | NA     | NA |
| 67 | O43172 | PRPF4    | U4/U6 small nuc   | sp O43172 PRP4_HUMAN  | 3  | 6.5  | 0.1268163 | 0.57017 | 0.9984 | 0.4057  | 0.57017 | 0.99836 | 6  | 15.5 | NA      | NA      | NA     | NA      | NA     | NA     | NA |
| 68 | O43175 | PHGDH    | D-3-phosphoglyc   | sp O43175 SERA_HUMAN  | 16 | 37   | 0.2179407 | 0.29464 | 0.9991 | -0.6886 | 0.00341 | 0.03677 | 19 | 45   | 0.08821 | 0.66696 | 0.9973 | 1.63881 | #####  | #####  | 2  |
| 69 | O43242 | PSMD3    | 26S proteasome    | sp O43242 PSMD3_HUMAN | 16 | 33.7 | 0.1204179 | 0.52199 | 0.9991 | 0.1108  | 0.55546 | 0.71474 | 16 | 34.5 | -0.0111 | 0.95243 | 0.9973 | -0.6519 | 0.0026 | 0.0073 | 4  |
| 70 | O43252 | PAPSS1   | Bifunctional 3-ph | sp O43252 PAPS1_HUMAN | 2  | 3.5  | NA        | NA      | NA     | NA      | NA      | NA      | 11 | 24.2 | -0.2012 | 0.41524 | 0.9991 | -0.5771 | 0.4152 | 0.9991 | NA |
| 71 | O43264 | ZW10     | Centromere/kin    | sp O43264 ZW10_HUMAN  | 2  | 4.1  | NA        | NA      | NA     | 0.3369  | NA      | NA      | NA | NA   | NA      | NA      | NA     | NA      | NA     | NA     | NA |
| 72 | O43324 | EEF1E1   | Eukaryotic trans  | sp O43324 MCA3_HUMAN  | 5  | 26.4 | 0.3846133 | 0.13472 | 0.9984 | 0.2689  | 0.13472 | 0.99836 | 6  | 33.9 | NA      | NA      | NA     | NA      | NA     | NA     | NA |
| 73 | O43390 | HNRNPR   | Heterogeneous     | sp O43390 HNRPR_HUMAN | 23 | 38.9 | 0.0690927 | 0.70729 | 0.9991 | 0.5847  | 0.01089 | 0.0683  | 25 | 42.5 | 0.04621 | 0.80144 | 0.9973 | 0.98834 | #####  | 0.0003 | 1  |
| 74 | O43396 | TXNL1    | Thioredoxin-like  | sp O43396 TXNL1_HUMAN | 7  | 30.1 | 0.2879908 | 0.19713 | 0.9991 | -0.0501 | 0.81783 | 0.91051 | 8  | 36.3 | 0.18714 | 0.39494 | 0.9973 | -1.4202 | #####  | #####  | 4  |
| 75 | O43399 | TPD52L2  | Tumor protein D   | sp O43399 TPD54_HUMAN | 4  | 29.1 | 0.1108939 | 0.64367 | 0.9984 | 0.0649  | 0.64367 | 0.99836 | 9  | 51.5 | NA      | NA      | NA     | NA      | NA     | NA     | NA |
| 76 | O43491 | EPB41L2  | Band 4.1-like pr  | sp O43491 E41L2_HUMAN | 26 | 28.8 | 0.1261575 | 0.55735 | 0.9984 | 1.0912  | 0.55735 | 0.99836 | 2  | 2.8  | NA      | NA      | NA     | NA      | NA     | NA     | NA |
| 77 | O43583 | DENR     | Density-regulate  | sp O43583 DENR_HUMAN  | 4  | 23.7 | NA        | NA      | NA     | 0.5414  | NA      | NA      | 7  | 49   | NA      | NA      | NA     | NA      | NA     | NA     | NA |
| 78 | O43615 | TIMM44   | Mitochondrial in  | sp O43615 TIM44_HUMAN | 7  | 18.8 | 0.2799074 | 0.15086 | 0.9984 | 0.5918  | 0.15086 | 0.99836 | 7  | 19.9 | NA      | NA      | NA     | NA      | NA     | NA     | NA |
| 79 | O43660 | PLRG1    | Pleiotropic regu  | sp O43660 PLRG1_HUMAN | 3  | 6.4  | 0.7442529 | 0.18506 | 0.9984 | 1.4454  | 0.18506 | 0.99836 | 3  | 7.8  | 0.04405 | NA      | NA     | NA      | NA     | NA     | NA |
| 80 | O43670 | ZNF207   | BUB3-interacting  | sp O43670 ZN207_HUMAN | 2  | 5.4  | NA        | NA      | NA     | NA      | NA      | NA      | 3  | 7.9  | NA      | NA      | NA     | 1.69664 | NA     | NA     | NA |
| 81 | O43684 | BUB3     | Mitotic checkpoi  | sp O43684 BUB3_HUMAN  | 5  | 20.7 | 0.271462  | 0.18924 | 0.9991 | 0.3294  | 0.11555 | 0.28056 | 6  | 29   | 0.12503 | 0.53681 | 0.9973 | -0.6676 | 0.0038 | 0.0099 | 5  |
| 82 | O43707 | ACTN4    | Alpha-actinin-4   | sp O43707 ACTN4_HUMAN | 28 | 39.2 | -0.046027 | 0.88056 | 0.9991 | -0.8923 | 0.00907 | 0.06244 | 45 | 57.2 | -0.0161 | 0.95813 | 0.9973 | -0.7712 | 0.0208 | 0.0415 | 3  |
| 83 | O43719 | HTATSF1  | HIV Tat-specific  | sp O43719 HTSF1_HUMAN | 4  | 7.2  | 0.4456123 | 0.21915 | 0.9984 | 0.0756  | 0.21915 | 0.99836 | 6  | 10.7 | NA      | NA      | NA     | NA      | NA     | NA     | NA |
| 84 | O43765 | SGTA     | Small glutamine   | sp O43765 SGTA_HUMAN  | 3  | 12.8 | 0.0567004 | 0.77807 | 0.9984 | 0.0827  | 0.77807 | 0.99836 | 7  | 27.2 | NA      | NA      | NA     | 1.24055 | NA     | NA     | NA |
| 85 | O43768 | ENSA     | Alpha-endosulfur  | sp O43768 ENSA_HUMAN  | 3  | 30.6 | 0.3188028 | 0.3595  | 0.9991 | -0.0265 | 0.93855 | 0.96022 | 7  | 60.3 | 0.11161 | 0.74553 | 0.9973 | 0.79123 | 0.0323 | 0.0597 | 1  |
| 86 | O43776 | NARS     | Asparagine-tRNA   | sp O43776 SYNC_HUMAN  | 11 | 24.3 | -0.188964 | 0.56107 | 0.9984 | -0.8073 | 0.56107 | 0.99836 | 10 | 23.2 | -0.0499 | NA      | NA     | NA      | NA     | NA     | NA |
| 87 | O43795 | MYO1B    | Unconventional    | sp O43795 MYO1B_HUMAN | 3  | 3.3  | NA        | NA      | NA     | NA      | NA      | NA      | 8  | 9.8  | -0.034  | 0.96617 | 0.9991 | 1.36166 | 0.9662 | 0.9991 | NA |
| 88 | O43852 | CALU     | Calumenin         | sp O43852 CALU_HUMAN  | 12 | 50.2 | 0.2649089 | 0.26946 | 0.9991 | 0.5196  | 0.03916 | 0.1469  | 17 | 64.4 | 0.11095 | 0.63845 | 0.9973 | -0.2957 | 0.2199 | 0.3045 | 5  |
| 89 | O43865 | AHCYL1   | S-adenosylhomo    | sp O43865 SAHH2_HUMAN | 2  | 4.3  | -0.293612 | NA      | NA     | NA      | NA      | NA      | 5  | 13.6 | NA      | NA      | NA     | NA      | NA     | NA     | NA |
| 90 | O60216 | RAD21    | Double-strand-b   | sp O60216 RAD21_HUMAN | 5  | 12   | -0.059642 | 0.85026 | 0.9984 | 0.1254  | 0.85026 | 0.99836 | 2  | 5.7  | NA      | NA      | NA     | NA      | NA     | NA     | NA |
| 91 | O60264 | SMARCA5  | SWI/SNF-related   | sp O60264 SMCA5_HUMAN | 19 | 22.2 | 0.1649243 | 0.40299 | 0.9991 | 0.5611  | 0.00983 | 0.06319 | 15 | 17.5 | -0.0527 | 0.78736 | 0.9973 | -0.2105 | 0.289  | 0.3746 | 5  |
| 92 | O60271 | SPAG9    | C-Jun-amino-term  | sp O60271 JIP4_HUMAN  | 3  | 3.5  | NA        | NA      | NA     | NA      | NA      | NA      | 9  | 10.1 | -0.4317 | NA      | NA     | NA      | NA     | NA     | NA |

|     |        |          |                    |                       |    |      |           |         |        |         |         |         |    |      |         |         |        |         |        |        |    |
|-----|--------|----------|--------------------|-----------------------|----|------|-----------|---------|--------|---------|---------|---------|----|------|---------|---------|--------|---------|--------|--------|----|
| 93  | O60313 | OPA1     | Dynamamin-like 12  | sp O60313 OPA1_HUMAN  | 2  | 2.7  | 0.0911449 | 0.81198 | 0.9991 | -0.1398 | 0.75241 | 0.86792 | 3  | 3.9  | 0.09461 | 0.79349 | 0.9973 | -2.0625 | 0.0005 | 0.0018 | 4  |
| 94  | O60341 | KDM1A    | Lysine-specific hi | sp O60341 KDM1A_HUMA  | 6  | 14.3 | 0.4521063 | 0.08611 | 0.9984 | 0.6803  | 0.08611 | 0.99836 | 9  | 13.3 | NA      | NA      | NA     | NA      | NA     | NA     | NA |
| 95  | O60488 | ACSL4    | Long-chain-fatty   | sp O60488 ACSL4_HUMAN | 8  | 14.5 | 0.0131394 | 0.95708 | 0.999  | 0.3679  | 0.95708 | 0.99899 | 6  | 11.5 | -0.1005 | NA      | NA     | NA      | NA     | NA     | NA |
| 96  | O60502 | OGA      | Protein O-GlcNA    | sp O60502 OGA_HUMAN   | 4  | 5.2  | 0.0416963 | 0.81781 | 0.9984 | -0.0065 | 0.81781 | 0.99836 | 2  | 2.7  | NA      | NA      | NA     | NA      | NA     | NA     | NA |
| 97  | O60506 | SYNCRIP  | Heterogeneous      | sp O60506 HNRPO_HUMA  | 25 | 45.7 | -0.043179 | 0.8444  | 0.9991 | -0.2155 | 0.33416 | 0.53481 | 26 | 52.2 | 0.12732 | 0.56457 | 0.9973 | 0.28255 | 0.21   | 0.2948 | NA |
| 98  | O60566 | BUB1B    | Mitotic checkpoi   | sp O60566 BUB1B_HUMAN | 3  | 3.3  | -0.087041 | 0.83222 | 0.9984 | 0.8282  | 0.83222 | 0.99836 | NA | NA   | NA      | NA      | NA     | NA      | NA     | NA     | NA |
| 99  | O60610 | DIAPH1   | Protein diaphan    | sp O60610 DIAP1_HUMAN | 5  | 4.8  | -0.058727 | 0.81862 | 0.9984 | 0.006   | 0.81862 | 0.99836 | 5  | 4.9  | NA      | NA      | NA     | NA      | NA     | NA     | NA |
| 100 | O60664 | PLIN3    | Perilipin-3        | sp O60664 PLIN3_HUMAN | 3  | 8.3  | -0.522162 | 0.08683 | 0.9984 | -0.868  | 0.08683 | 0.99836 | 8  | 26.5 | NA      | NA      | NA     | 2.03141 | NA     | NA     | NA |
| 101 | O60684 | KPNA6    | Importin subunit   | sp O60684 IMA7_HUMAN  | 2  | 5.4  | NA        | NA      | NA     | NA      | NA      | NA      | 9  | 28.4 | 0.09468 | 0.62715 | 0.9991 | 0.08749 | 0.6272 | 0.9991 | NA |
| 102 | O60701 | UGDH     | UDP-glucose 6-d    | sp O60701 UGDH_HUMAN  | 8  | 20.9 | 0.1246908 | 0.76112 | 0.9991 | -0.1322 | 0.81961 | 0.91051 | 11 | 27.3 | -0.0755 | 0.85376 | 0.9973 | -1.8086 | 0.0005 | 0.0017 | 4  |
| 103 | O60716 | CTNND1   | Catenin delta-1    | sp O60716 CTND1_HUMA  | 6  | 7.4  | NA        | NA      | NA     | NA      | NA      | NA      | 9  | 12.6 | -0.3299 | NA      | NA     | NA      | NA     | NA     | NA |
| 104 | O60749 | SNX2     | Sorting nexin-2    | sp O60749 SNX2_HUMAN  | 7  | 16.4 | 0.289386  | 0.43986 | 0.9991 | -0.5146 | 0.17789 | 0.35476 | 11 | 26.4 | 0.24868 | 0.5058  | 0.9973 | -0.0812 | 0.8269 | 0.8571 | NA |
| 105 | O60763 | USO1     | General vesicula   | sp O60763 USO1_HUMAN  | 11 | 17.3 | -0.046489 | 0.76957 | 0.9984 | -0.1701 | 0.76957 | 0.99836 | 6  | 8    | NA      | NA      | NA     | NA      | NA     | NA     | NA |
| 106 | O60841 | EIF5B    | Eukaryotic trans   | sp O60841 IF2P_HUMAN  | 10 | 10.7 | 0.0338857 | 0.90056 | 0.9984 | -0.2159 | 0.90056 | 0.99836 | 18 | 21.3 | -0.0947 | NA      | NA     | NA      | NA     | NA     | NA |
| 107 | O60869 | EDF1     | Endothelial diffe  | sp O60869 EDF1_HUMAN  | 5  | 35.8 | -0.213205 | 0.71486 | 0.9984 | -0.748  | 0.71486 | 0.99836 | 4  | 24.3 | NA      | NA      | NA     | NA      | NA     | NA     | NA |
| 108 | O60884 | DNAJA2   | DnaJ homolog su    | sp O60884 DNJA2_HUMA  | 8  | 25.7 | 0.2551244 | 0.3369  | 0.9991 | 0.0808  | 0.78269 | 0.88789 | 10 | 29.6 | -0.0483 | 0.8536  | 0.9973 | 0.48753 | 0.0772 | 0.129  | NA |
| 109 | O60885 | BRD4     | Bromodomain-co     | sp O60885 BRD4_HUMAN  | 6  | 4.8  | -1.266953 | NA      | NA     | NA      | NA      | NA      | 5  | 4.6  | 0.13977 | 0.66001 | 0.9991 | -0.0758 | 0.66   | 0.9991 | NA |
| 110 | O60925 | PFDN1    | Prefoldin subuni   | sp O60925 PFD1_HUMAN  | 4  | 31.1 | -0.0897   | 0.79898 | 0.9991 | -0.2362 | 0.63637 | 0.7779  | 6  | 56.6 | -0.5752 | 0.11786 | 0.9973 | 1.13965 | 0.0051 | 0.0128 | 2  |
| 111 | O75083 | WDR1     | WD repeat-cont     | sp O75083 WDR1_HUMAN  | 18 | 42.7 | 0.0470403 | 0.86157 | 0.9991 | -1.2908 | 0.00016 | 0.00845 | 11 | 27.1 | 0.12427 | 0.64596 | 0.9973 | -1.159  | 0.0005 | 0.0017 | 3  |
| 112 | O75190 | DNJB6    | DnaJ homolog su    | sp O75190 DNJB6_HUMAN | 5  | 20.2 | 0.194569  | 0.37804 | 0.9984 | 0.1431  | 0.37804 | 0.99836 | 3  | 10.4 | NA      | NA      | NA     | NA      | NA     | NA     | NA |
| 113 | O75223 | GGCT     | Gamma-glutamyl     | sp O75223 GGCT_HUMAN  | 4  | 23.4 | 0.343426  | 0.3981  | 0.9984 | -0.3863 | 0.3981  | 0.99836 | 6  | 37.2 | NA      | NA      | NA     | NA      | NA     | NA     | NA |
| 114 | O75347 | TBCA     | Tubulin-specific   | sp O75347 TBCA_HUMAN  | 8  | 56.5 | -0.13052  | 0.68505 | 0.9991 | -0.6782 | 0.04805 | 0.17027 | 11 | 58.3 | -0.5728 | 0.12503 | 0.9973 | 2.65722 | #####  | #####  | 2  |
| 115 | O75348 | ATP6V1G1 | V-type proton A    | sp O75348 VATG1_HUMA  | 2  | 22   | NA        | NA      | NA     | 0.0998  | NA      | NA      | 3  | 28.8 | NA      | NA      | NA     | NA      | NA     | NA     | NA |
| 116 | O75367 | H2AFY    | Core histone ma    | sp O75367 H2AY_HUMAN  | 4  | 19.1 | 0.2585687 | 0.5553  | 0.9991 | 0.6128  | 0.22015 | 0.41184 | 11 | 39.8 | 0.42171 | 0.3406  | 0.9973 | 2.68739 | #####  | #####  | 1  |
| 117 | O75368 | SH3BGRL  | SH3 domain-bind    | sp O75368 SH3L1_HUMAN | 1  | 8.8  | NA        | NA      | NA     | NA      | NA      | NA      | 4  | 46.5 | -0.09   | NA      | NA     | NA      | NA     | NA     | NA |
| 118 | O75369 | FLNB     | Filamin-B          | sp O75369 FLNB_HUMAN  | 64 | 34.7 | 0.0718831 | 0.70238 | 0.9991 | -0.29   | 0.13584 | 0.30186 | 43 | 23.3 | 0.25087 | 0.19316 | 0.9973 | -2.4641 | #####  | #####  | 4  |
| 119 | O75390 | CS       | Citrate synthase   | sp O75390 CISY_HUMAN  | 6  | 13.3 | -0.175336 | 0.36321 | 0.9991 | 0.4001  | 0.04827 | 0.17027 | 9  | 20.8 | -0.1936 | 0.31667 | 0.9973 | -0.3436 | 0.085  | 0.1409 | 5  |
| 120 | O75396 | SEC22B   | Vesicle-trafficir  | sp O75396 SC22B_HUMAN | 1  | 6.5  | NA        | NA      | NA     | NA      | NA      | NA      | 7  | 34   | 0.26894 | 0.33692 | 0.9991 | 0.72145 | 0.3369 | 0.9991 | NA |
| 121 | O75400 | PRPF40A  | Pre-mRNA-proce     | sp O75400 PR40A_HUMAN | 5  | 5.3  | 0.163888  | 0.79031 | 0.9984 | 1.268   | 0.79031 | 0.99836 | 5  | 4.7  | NA      | NA      | NA     | NA      | NA     | NA     | NA |
| 122 | O75436 | VPS26A   | Vacuolar protein   | sp O75436 VP26A_HUMA  | 4  | 15.6 | NA        | NA      | NA     | NA      | NA      | NA      | 8  | 33   | 0.32988 | 0.2744  | 0.9991 | 0.17202 | 0.2744 | 0.9991 | NA |
| 123 | O75475 | PSIP1    | PC4 and SFRS1-i    | sp O75475 PSIP1_HUMAN | 19 | 40   | -0.015337 | 0.95286 | 0.9991 | 0.508   | 0.06378 | 0.20018 | 9  | 19.6 | -0.2563 | 0.33038 | 0.9973 | 0.07635 | 0.7688 | 0.8136 | NA |
| 124 | O75477 | ERLIN1   | Erlin-1            | sp O75477 ERLN1_HUMAN | 6  | 19.1 | 0.1976386 | 0.48993 | 0.9991 | 1.2773  | 0.00416 | 0.03837 | 6  | 20.2 | -1.3832 | 0.00366 | 0.6565 | -0.4307 | 0.1488 | 0.2198 | 5  |
| 125 | O75487 | GPC4     | Glypican-4         | sp O75487 GPC4_HUMAN  | 7  | 15.1 | -0.258991 | 0.35435 | 0.9984 | 0.4062  | 0.35435 | 0.99836 | NA | NA   | NA      | NA      | NA     | NA      | NA     | NA     | NA |
| 126 | O75533 | SF3B1    | Splicing factor 3  | sp O75533 SF3B1_HUMAN | 14 | 14.5 | 0.0781279 | 0.66895 | 0.9991 | 0.6149  | 0.00337 | 0.03677 | 27 | 28.5 | 0.03993 | 0.82666 | 0.9973 | -0.1178 | 0.5207 | 0.6112 | 5  |
| 127 | O75534 | CSDE1    | Cold shock doma    | sp O75534 CSDE1_HUMA  | 16 | 24.6 | 0.0567411 | 0.84904 | 0.9991 | -0.1043 | 0.72681 | 0.85174 | 18 | 23.6 | -0.1324 | 0.65781 | 0.9973 | 0.94888 | 0.0051 | 0.0127 | 2  |
| 128 | O75607 | NPM3     | Nucleoplasmin-3    | sp O75607 NPM3_HUMAN  | 3  | 23.6 | 0.5992544 | NA      | NA     | NA      | NA      | NA      | 2  | 14.6 | NA      | NA      | NA     | NA      | NA     | NA     | NA |
| 129 | O75643 | SNRNP200 | U5 small nuclear   | sp O75643 US20_HUMAN  | 19 | 9.9  | -0.031705 | 0.87362 | 0.9991 | 0.2788  | 0.17423 | 0.35193 | 27 | 16.4 | 0.03994 | 0.84122 | 0.9973 | 0.45663 | 0.0331 | 0.061  | 1  |
| 130 | O75694 | NUP155   | Nuclear pore cor   | sp O75694 NU155_HUMA  | 5  | 5.3  | 0.8225538 | 0.10093 | 0.9984 | 0.7064  | 0.10093 | 0.99836 | 8  | 8.1  | 0.08355 | NA      | NA     | NA      | NA     | NA     | NA |
| 131 | O75717 | WDHD1    | WD repeat and      | sp O75717 WDHD1_HUMA  | 3  | 3.7  | 0.1839963 | 0.33458 | 0.9984 | 0.1375  | 0.33458 | 0.99836 | 1  | 1.6  | NA      | NA      | NA     | NA      | NA     | NA     | NA |
| 132 | O75787 | ATP6AP2  | Renin receptor     | sp O75787 RENR_HUMAN  | 2  | 5.4  | NA        | NA      | NA     | NA      | NA      | NA      | 2  | 7.7  | 0.11922 | NA      | NA     | NA      | NA     | NA     | NA |
| 133 | O75821 | EIF3G    | Eukaryotic trans   | sp O75821 EIF3G_HUMAN | 7  | 28.8 | 0.0799303 | 0.71157 | 0.9991 | -0.1799 | 0.40937 | 0.60515 | 11 | 36.2 | 0.12429 | 0.5665  | 0.9973 | -0.9575 | 0.0003 | 0.0013 | 4  |
| 134 | O75822 | EIF3J    | Eukaryotic trans   | sp O75822 EIF3J_HUMAN | 7  | 30.6 | 0.2842782 | 0.22803 | 0.9991 | 0.0668  | 0.77234 | 0.88037 | 10 | 48.1 | 0.21551 | 0.35621 | 0.9973 | -0.1961 | 0.4002 | 0.4952 | NA |
| 135 | O75832 | PSMD10   | 26S proteasome     | sp O75832 PSD10_HUMAN | 3  | 13.7 | 0.6857441 | NA      | NA     | NA      | NA      | NA      | NA | NA   | NA      | NA      | NA     | NA      | NA     | NA     | NA |
| 136 | O75844 | ZMPSTE24 | CAAX prenyl pro    | sp O75844 FACE1_HUMAN | 7  | 13.9 | 0.0229702 | 0.94742 | 0.999  | 0.4829  | 0.94742 | 0.99899 | 7  | 18.9 | NA      | NA      | NA     | NA      | NA     | NA     | NA |
| 137 | O75874 | IDH1     | Isocitrate dehyd   | sp O75874 IDHC_HUMAN  | 20 | 57.7 | -0.083871 | 0.82982 | 0.9991 | -0.7271 | 0.07702 | 0.22519 | 13 | 40.3 | 0.39093 | 0.37614 | 0.9973 | 3.56196 | #####  | #####  | 2  |
| 138 | O75937 | DNJC8    | DnaJ homolog su    | sp O75937 DNJC8_HUMAN | 4  | 23.3 | 0.3626254 | 0.33304 | 0.9991 | 0.5043  | 0.18402 | 0.36444 | 7  | 27.7 | 0.10734 | 0.77151 | 0.9973 | 1.10992 | 0.0074 | 0.0171 | 1  |
| 139 | O75947 | ATP5PD   | ATP synthase su    | sp O75947 ATP5H_HUMA  | 7  | 55.9 | 0.2738739 | 0.31239 | 0.9984 | 0.6344  | 0.31239 | 0.99836 | 8  | 65.2 | NA      | NA      | NA     | NA      | NA     | NA     | NA |
| 140 | O75955 | FLOT1    | Flotillin-1        | sp O75955 FLOT1_HUMAN | 2  | 6.3  | NA        | NA      | NA     | NA      | NA      | NA      | 4  | 12.2 | -0.3598 | NA      | NA     | NA      | NA     | NA     | NA |

|     |        |         |                                               |                       |    |      |           |         |        |         |         |         |    |      |         |         |        |         |        |        |    |
|-----|--------|---------|-----------------------------------------------|-----------------------|----|------|-----------|---------|--------|---------|---------|---------|----|------|---------|---------|--------|---------|--------|--------|----|
| 141 | O75964 | ATP5MG  | ATP synthase subunit 5                        | sp O75964 ATP5L_HUMAN | 3  | 32   | -0.276163 | 0.44576 | 0.9984 | 0.4752  | 0.44576 | 0.99836 | 3  | 34   | NA      | NA      | NA     | NA      | NA     | NA     | NA |
| 142 | O76003 | GLRX3   | Glutaredoxin-3                                | sp O76003 GLRX3_HUMAN | 11 | 43   | 0.0664878 | 0.81042 | 0.9984 | -0.181  | 0.81042 | 0.99836 | 15 | 57.3 | NA      | NA      | NA     | 2.5511  | NA     | NA     | NA |
| 143 | O76021 | RSL1D1  | Ribosomal L1 domain                           | sp O76021 RL1D1_HUMAN | 4  | 9.6  | -0.630967 | 0.21524 | 0.9984 | 0.2058  | 0.21524 | 0.99836 | 8  | 19.4 | NA      | NA      | NA     | NA      | NA     | NA     | NA |
| 144 | O76070 | SNCG    | Gamma-synuclein                               | sp O76070 SYUG_HUMAN  | 3  | 33.1 | 0.1668208 | NA      | NA     | NA      | NA      | NA      | NA | NA   | NA      | NA      | NA     | NA      | NA     | NA     | NA |
| 145 | O76094 | SRP72   | Signal recognition particle                   | sp O76094 SRP72_HUMAN | 11 | 18.3 | 0.3689523 | NA      | NA     | NA      | NA      | NA      | 7  | 15.5 | 0.10211 | NA      | NA     | NA      | NA     | NA     | NA |
| 146 | O94808 | GFPT2   | Glutamine-fructose-6-phosphate transaminase 2 | sp O94808 GFPT2_HUMAN | 5  | 10   | -1.152142 | 0.04504 | 0.9984 | 0.7199  | 0.04504 | 0.99836 | 5  | 9.8  | NA      | NA      | NA     | NA      | NA     | NA     | NA |
| 147 | O94826 | TOMM70  | Mitochondrial import 70                       | sp O94826 TOM70_HUMAN | 4  | 6.9  | -0.162299 | 0.71507 | 0.9991 | -0.3594 | 0.42476 | 0.6146  | 14 | 31.2 | 0.08717 | 0.73402 | 0.9973 | 0.93217 | 0.0037 | 0.0096 | 2  |
| 148 | O94905 | ERLIN2  | Erlin-2                                       | sp O94905 ERLN2_HUMAN | 7  | 24.5 | -0.152241 | 0.47592 | 0.9984 | 0.6605  | 0.47592 | 0.99836 | 5  | 18.6 | NA      | NA      | NA     | NA      | NA     | NA     | NA |
| 149 | O94906 | PRPF6   | Pre-mRNA processing factor 6                  | sp O94906 PRP6_HUMAN  | 2  | 2.8  | NA        | NA      | NA     | NA      | NA      | NA      | 7  | 8.6  | 0.09813 | NA      | NA     | NA      | NA     | NA     | NA |
| 150 | O94925 | GLS     | Glutaminase kidney                            | sp O94925 GLSK_HUMAN  | 2  | 3.7  | NA        | NA      | NA     | NA      | NA      | NA      | 6  | 12.3 | 0.06018 | 0.7902  | 0.9991 | 0.19486 | 0.7902 | 0.9991 | NA |
| 151 | O94992 | HEXIM1  | Protein HEXIM1                                | sp O94992 HEX1_HUMAN  | 1  | 7    | NA        | NA      | NA     | NA      | NA      | NA      | 3  | 15.6 | 0.28728 | 0.41691 | 0.9991 | -0.2148 | 0.4169 | 0.9991 | NA |
| 152 | O95104 | SCAF4   | Splicing factor, 4                            | sp O95104 SFR15_HUMAN | 5  | 5.8  | 0.1566584 | 0.70496 | 0.9984 | 1.259   | 0.70496 | 0.99836 | 3  | 4.2  | NA      | NA      | NA     | NA      | NA     | NA     | NA |
| 153 | O95163 | ELP1    | Elongator complex subunit 1                   | sp O95163 ELP1_HUMAN  | 2  | 1.9  | NA        | NA      | NA     | NA      | NA      | NA      | 7  | 6.5  | -0.0907 | NA      | NA     | NA      | NA     | NA     | NA |
| 154 | O95197 | RTN3    | Reticulon-3                                   | sp O95197 RTN3_HUMAN  | 2  | 4.6  | 0.009762  | 0.95979 | 0.999  | 0.8018  | 0.95979 | 0.99899 | 3  | 5.6  | NA      | NA      | NA     | NA      | NA     | NA     | NA |
| 155 | O95202 | LETM1   | Mitochondrial protein                         | sp O95202 LETM1_HUMAN | 13 | 21.1 | 0.018274  | 0.9601  | 0.999  | -0.0207 | 0.9601  | 0.99899 | 9  | 12.9 | 0.30183 | NA      | NA     | NA      | NA     | NA     | NA |
| 156 | O95232 | LUC7L3  | Luc7-like protein                             | sp O95232 LC7L3_HUMAN | 2  | 5.8  | NA        | NA      | NA     | NA      | NA      | NA      | 7  | 20.8 | 0.14772 | 0.46893 | 0.9991 | 0.00248 | 0.4689 | 0.9991 | NA |
| 157 | O95239 | KIF4A   | Chromosome-associated protein 4               | sp O95239 KIF4A_HUMAN | 4  | 3.4  | -0.374034 | 0.38694 | 0.9984 | -0.0854 | 0.38694 | 0.99836 | 7  | 5.7  | 0.10051 | NA      | NA     | NA      | NA     | NA     | NA |
| 158 | O95292 | VAPB    | Vesicle-associated protein B                  | sp O95292 VAPB_HUMAN  | 5  | 26.7 | NA        | NA      | NA     | NA      | NA      | NA      | 9  | 45.3 | 0.38166 | 0.2693  | 0.9991 | 2.13486 | 0.2693 | 0.9991 | NA |
| 159 | O95347 | SMC2    | Structural maintenance of chromosomes 2       | sp O95347 SMC2_HUMAN  | 16 | 16.1 | 0.3366711 | 0.09297 | 0.9991 | 0.3984  | 0.07716 | 0.22519 | 11 | 10.6 | 0.10863 | 0.5691  | 0.9973 | -0.709  | 0.0181 | 0.0368 | 5  |
| 160 | O95373 | IPO7    | Importin-7                                    | sp O95373 IPO7_HUMAN  | 7  | 8.4  | 0.1465205 | 0.58005 | 0.9991 | 0.2152  | 0.46889 | 0.64919 | 16 | 20.5 | -0.1219 | 0.64484 | 0.9973 | -0.9772 | 0.0018 | 0.0052 | 4  |
| 161 | O95433 | AHSA1   | Activator of 90 kDa                           | sp O95433 AHSA1_HUMAN | 7  | 34.6 | -0.193404 | 0.57379 | 0.9991 | -0.1013 | 0.815   | 0.91051 | 11 | 44.4 | 0.09944 | 0.74543 | 0.9973 | 0.75457 | 0.0254 | 0.049  | 2  |
| 162 | O95456 | PSMG1   | Proteasome activator subunit 1                | sp O95456 PSMG1_HUMAN | 2  | 8    | 0.631064  | 0.05174 | 0.9984 | 0.1397  | 0.05174 | 0.99836 | 2  | 8    | NA      | NA      | NA     | NA      | NA     | NA     | NA |
| 163 | O95671 | ASMTL   | Probable bifunctional                         | sp O95671 ASML_HUMAN  | 4  | 7.7  | -0.485979 | 0.13061 | 0.9984 | -0.8344 | 0.13061 | 0.99836 | NA | NA   | NA      | NA      | NA     | NA      | NA     | NA     | NA |
| 164 | O95747 | OXSRI   | Serine/threonine kinase                       | sp O95747 OXSRI_HUMAN | 2  | 4.6  | NA        | NA      | NA     | NA      | NA      | NA      | 6  | 12.1 | 0.3618  | 0.25953 | 0.9991 | -0.3366 | 0.2595 | 0.9991 | NA |
| 165 | O95782 | AP2A1   | AP-2 complex subunit 1                        | sp O95782 AP2A1_HUMAN | 7  | 8.3  | 0.0459722 | 0.83205 | 0.9984 | 0.1341  | 0.83205 | 0.99836 | 11 | 13.2 | 0.20067 | NA      | NA     | NA      | NA     | NA     | NA |
| 166 | O95819 | MAP4K4  | Mitogen-activated protein kinase 4            | sp O95819 M4K4_HUMAN  | 3  | 3.6  | NA        | NA      | NA     | NA      | NA      | NA      | 6  | 6.5  | -0.8129 | NA      | NA     | NA      | NA     | NA     | NA |
| 167 | O95831 | AIFM1   | Apoptosis-inducing factor 1                   | sp O95831 AIFM1_HUMAN | 16 | 32.6 | 0.0820011 | 0.7534  | 0.9991 | 0.6715  | 0.01847 | 0.09524 | 9  | 17.1 | -0.1895 | 0.47086 | 0.9973 | -0.2563 | 0.3325 | 0.4225 | 5  |
| 168 | O95864 | FADS2   | Acyl-CoA de-saturase 2                        | sp O95864 FADS2_HUMAN | 5  | 15.1 | -0.148753 | 0.73846 | 0.9984 | 0.5931  | 0.73846 | 0.99836 | 4  | 11.9 | NA      | NA      | NA     | NA      | NA     | NA     | NA |
| 169 | O95881 | TXNDC12 | Thioredoxin domain containing 12              | sp O95881 TXD12_HUMAN | 4  | 30.8 | 0.2241703 | 0.50922 | 0.9991 | 0.0614  | 0.86799 | 0.92126 | 4  | 29.7 | 0.1036  | 0.75879 | 0.9973 | 0.27394 | 0.4218 | 0.5138 | NA |
| 170 | O96008 | TOMM40  | Mitochondrial import 40                       | sp O96008 TOM40_HUMAN | 6  | 21.6 | -0.390405 | 0.30712 | 0.9984 | 0.6056  | 0.30712 | 0.99836 | 2  | 6.1  | NA      | NA      | NA     | NA      | NA     | NA     | NA |
| 171 | O96019 | ACTL6A  | Actin-like protein 6A                         | sp O96019 ACL6A_HUMAN | 4  | 12.6 | -0.222544 | 0.40236 | 0.9991 | 0.5604  | 0.071   | 0.21331 | 8  | 29.4 | 0.26899 | 0.314   | 0.9973 | 0.18264 | 0.4903 | 0.5797 | NA |
| 172 | P00167 | CYB5A   | Cytochrome b5                                 | sp P00167 CYB5_HUMAN  | 5  | 49.3 | -0.296963 | 0.46851 | 0.9991 | 0.6705  | 0.17091 | 0.34711 | 5  | 42.5 | -0.1945 | 0.52282 | 0.9973 | -0.4003 | 0.158  | 0.2325 | NA |
| 173 | P00338 | LDHA    | L-lactate dehydrogenase                       | sp P00338 LDHA_HUMAN  | 13 | 41.3 | -0.11258  | 0.87051 | 0.9991 | -0.9967 | 0.16162 | 0.33626 | 13 | 37   | -0.2487 | 0.71918 | 0.9973 | -2.2968 | 0.0037 | 0.0097 | 4  |
| 174 | P00367 | GLUD1   | Glutamate dehydrogenase 1                     | sp P00367 DHE3_HUMAN  | 11 | 23.3 | -0.026912 | 0.88027 | 0.9991 | 0.4967  | 0.01203 | 0.07061 | 14 | 31   | -0.0394 | 0.82564 | 0.9973 | -0.6715 | 0.0015 | 0.0044 | 5  |
| 175 | P00374 | DHFR    | Dihydrofolate reductase                       | sp P00374 DYR_HUMAN   | 4  | 24.6 | NA        | NA      | NA     | NA      | NA      | NA      | 5  | 31   | -0.1792 | NA      | NA     | NA      | NA     | NA     | NA |
| 176 | P00387 | CYB5R3  | NADH-cytochrome b5 reductase 3                | sp P00387 NB5R3_HUMAN | 3  | 13.3 | -0.252115 | 0.37053 | 0.9984 | 0.7605  | 0.37053 | 0.99836 | 8  | 28.9 | NA      | NA      | NA     | NA      | NA     | NA     | NA |
| 177 | P00390 | GSR     | Glutathione reductase                         | sp P00390 GSHR_HUMAN  | 3  | 8.2  | 0.0301839 | 0.88452 | 0.9991 | -0.4177 | 0.08707 | 0.24019 | 6  | 16.1 | 0.23975 | 0.25866 | 0.9973 | 0.18701 | 0.3744 | 0.4698 | NA |
| 178 | P00403 | MT-CO2  | Cytochrome c oxidase 2                        | sp P00403 COX2_HUMAN  | 4  | 24.7 | -0.702172 | 0.18675 | 0.9984 | 0.5655  | 0.18675 | 0.99836 | 5  | 27.8 | NA      | NA      | NA     | NA      | NA     | NA     | NA |
| 179 | P00441 | SOD1    | Superoxide dismutase 1                        | sp P00441 SODC_HUMAN  | 5  | 40.3 | -0.082309 | 0.8248  | 0.9984 | -0.5955 | 0.8248  | 0.99836 | 8  | 69.5 | NA      | NA      | NA     | NA      | NA     | NA     | NA |
| 180 | P00491 | PNP     | Purine nucleoside phosphorylase               | sp P00491 PNPH_HUMAN  | 6  | 27   | 0.1197411 | 0.48763 | 0.9984 | -0.2984 | 0.48763 | 0.99836 | 12 | 58.5 | -0.6365 | NA      | NA     | NA      | NA     | NA     | NA |
| 181 | P00492 | HPRT1   | Hypoxanthine phosphoribosyl transferase 1     | sp P00492 HPRT_HUMAN  | 4  | 22   | -0.038893 | NA      | NA     | NA      | NA      | NA      | 5  | 25.7 | NA      | NA      | NA     | NA      | NA     | NA     | NA |
| 182 | P00505 | GOT2    | Aspartate aminotransferase 2                  | sp P00505 AATM_HUMAN  | 9  | 19.5 | 0.1645103 | 0.38431 | 0.9991 | 0.3419  | 0.08125 | 0.23223 | 12 | 32.1 | -0.0532 | 0.77628 | 0.9973 | 0.02252 | 0.9041 | 0.917  | NA |
| 183 | P00558 | PGK1    | Phosphoglycerate kinase 1                     | sp P00558 PGK1_HUMAN  | 22 | 59   | 0.0509379 | 0.79407 | 0.9991 | -0.6753 | 0.00277 | 0.03304 | 28 | 80.1 | -0.0219 | 0.91042 | 0.9973 | -0.8222 | 0.0005 | 0.0019 | 3  |
| 184 | P01111 | NRAS    | GTPase NRas                                   | sp P01111 RASN_HUMAN  | 2  | 12.2 | 0.2233319 | 0.54478 | 0.9984 | 0.4146  | 0.54478 | 0.99836 | 2  | 12.2 | NA      | NA      | NA     | NA      | NA     | NA     | NA |
| 185 | P10316 | HLA-A   | HLA class I histocompatibility antigen A      | sp P10316 IA69_HUMAN  | 4  | 16.2 | -0.17651  | 0.55716 | 0.9984 | 0.4492  | 0.55716 | 0.99836 | NA | NA   | NA      | NA      | NA     | NA      | NA     | NA     | NA |
| 186 | P02545 | LMNA    | Prelamin-A/C                                  | sp P02545 LMNA_HUMAN  | 8  | 12.2 | 0.2575312 | 0.34365 | 0.9991 | 0.9011  | 0.00347 | 0.03677 | 35 | 51.8 | 0.02049 | 0.9391  | 0.9973 | -0.148  | 0.5827 | 0.6729 | 5  |
| 187 | P02786 | TFRC    | Transferrin receptor                          | sp P02786 TFR1_HUMAN  | 9  | 13.6 | -0.038067 | 0.87562 | 0.9991 | 0.8571  | 0.00713 | 0.05274 | 17 | 28   | 0.46379 | 0.21799 | 0.9973 | 2.98067 | #####  | #####  | 1  |
| 188 | P02787 | TF      | Serotransferrin                               | sp P02787 TRFE_HUMAN  | 6  | 10.6 | -0.598464 | 0.04363 | 0.9991 | 0.0581  | 0.85048 | 0.91851 | 17 | 29.1 | -0.3102 | 0.3221  | 0.9973 | 2.29499 | #####  | #####  | 1  |

|     |        |           |                                                      |                       |    |      |           |         |        |         |          |         |    |      |         |         |        |         |        |        |    |
|-----|--------|-----------|------------------------------------------------------|-----------------------|----|------|-----------|---------|--------|---------|----------|---------|----|------|---------|---------|--------|---------|--------|--------|----|
| 189 | P02794 | FTH1      | Ferritin heavy chain                                 | sp P02794 FTH1_HUMAN  | 5  | 28.4 | -0.041736 | 0.9095  | 0.9991 | -0.3584 | 0.33642  | 0.536   | 7  | 46.4 | 0.01222 | 0.97624 | 0.9973 | -0.1769 | 0.6313 | 0.715  | NA |
| 190 | P04075 | ALDOA     | Fructose-bisphosphate aldolase A                     | sp P04075 ALDOA_HUMAN | 16 | 60.2 | 0.0092993 | 0.97065 | 0.9991 | -1.1475 | 0.00027  | 0.00995 | 29 | 86.3 | 0.2353  | 0.35817 | 0.9973 | 0.7049  | 0.0118 | 0.0255 | 2  |
| 191 | P04080 | CSTB      | Cystatin-B                                           | sp P04080 CYTB_HUMAN  | 4  | 56.1 | -0.026302 | 0.91656 | 0.999  | -0.8345 | 0.91656  | 0.99899 | 4  | 56.1 | NA      | NA      | NA     | NA      | NA     | NA     | NA |
| 192 | P04179 | SOD2      | Superoxide dismutase [cytosolic]                     | sp P04179 SODM_HUMAN  | 2  | 9.5  | 0.0065781 | 0.98341 | 0.999  | 0.1695  | 0.98341  | 0.99899 | 2  | 9.9  | NA      | NA      | NA     | NA      | NA     | NA     | NA |
| 193 | P04181 | OAT       | Ornithine aminotransferase                           | sp P04181 OAT_HUMAN   | 11 | 33.9 | 0.1538625 | 0.63291 | 0.9984 | 0.278   | 0.63291  | 0.99836 | 6  | 19.8 | -0.4626 | NA      | NA     | NA      | NA     | NA     | NA |
| 194 | P04216 | THY1      | Thy-1 membrane protein                               | sp P04216 THY1_HUMAN  | 2  | 15.5 | -1.32124  | 0.05474 | 0.9984 | 0.1345  | 0.05474  | 0.99836 | 3  | 24.2 | NA      | NA      | NA     | NA      | NA     | NA     | NA |
| 195 | P04350 | TUBB4A    | Tubulin beta-4A class                                | sp P04350 TBB4A_HUMAN | 13 | 36.5 | -0.606018 | NA      | NA     | NA      | NA       | NA      | 20 | 63.7 | NA      | NA      | NA     | NA      | NA     | NA     | NA |
| 196 | P04406 | GAPDH     | Glyceraldehyde-3-phosphate dehydrogenase (cytosolic) | sp P04406 G3P_HUMAN   | 22 | 83.6 | -0.507128 | 0.02233 | 0.9991 | -1.33   | 5.30E-06 | 0.00188 | 19 | 78.5 | -0.2114 | 0.30817 | 0.9973 | 0.79327 | 0.0011 | 0.0035 | 2  |
| 197 | P04792 | HSPB1     | Heat shock protein beta-1                            | sp P04792 HSPB1_HUMAN | 3  | 19.5 | 0.0452162 | 0.93178 | 0.9991 | 0.7637  | 0.16276  | 0.33643 | 11 | 65.9 | 0.15594 | 0.76815 | 0.9973 | 1.67205 | 0.006  | 0.0144 | 1  |
| 198 | P04843 | RPN1      | Dolichyl-diphosphatase                               | sp P04843 RPN1_HUMAN  | 22 | 41.2 | -0.366745 | 0.07319 | 0.9991 | 0.2314  | 0.24416  | 0.44232 | 22 | 45.6 | -0.0265 | 0.89153 | 0.9973 | 0.38166 | 0.0633 | 0.1073 | NA |
| 199 | P04844 | RPN2      | Dolichyl-diphosphatase                               | sp P04844 RPN2_HUMAN  | 11 | 24.7 | -0.204137 | 0.47797 | 0.9991 | 0.0592  | 0.8358   | 0.91731 | 10 | 25.7 | 0.14396 | 0.61539 | 0.9973 | -0.1248 | 0.6629 | 0.7425 | NA |
| 200 | P04899 | GNAI2     | Guanine nucleotide-binding protein (G_i)-alpha-2     | sp P04899 GNAI2_HUMAN | 8  | 26.2 | 0.1150815 | 0.75046 | 0.9991 | 0.6046  | 0.10822  | 0.278   | 9  | 32.1 | 0.21827 | 0.54801 | 0.9973 | -2.0791 | #####  | 0.0001 | 4  |
| 201 | Q99878 | HIST1H2AJ | Histone H2A type 1 variant J                         | sp Q99878 H2A1J_HUMAN | 7  | 38.3 | -0.050322 | 0.92912 | 0.999  | 0.0309  | 0.92912  | 0.99899 | NA | NA   | NA      | NA      | NA     | NA      | NA     | NA     | NA |
| 202 | P05023 | ATP1A1    | Sodium/potassium-ATPase (alpha 1)                    | sp P05023 AT1A1_HUMAN | 29 | 35.1 | -0.155844 | 0.40574 | 0.9991 | 0.5155  | 0.01205  | 0.07061 | 28 | 35.2 | 0.11991 | 0.52052 | 0.9973 | -0.3075 | 0.1112 | 0.1721 | 5  |
| 203 | P05026 | ATP1B1    | Sodium/potassium-ATPase (alpha 1B)                   | sp P05026 AT1B1_HUMAN | 3  | 16.5 | 0.2166157 | 0.64022 | 0.9984 | 1.1638  | 0.64022  | 0.99836 | 2  | 8.9  | NA      | NA      | NA     | NA      | NA     | NA     | NA |
| 204 | P05067 | APP       | Amyloid-beta precursor protein                       | sp P05067 A4_HUMAN    | 4  | 8.6  | -0.299157 | 0.36695 | 0.9984 | 0.4322  | 0.36695  | 0.99836 | 1  | 2.1  | NA      | NA      | NA     | NA      | NA     | NA     | NA |
| 205 | P05091 | ALDH2     | Aldehyde dehydrogenase (NADP+)                       | sp P05091 ALDH2_HUMAN | 3  | 8.5  | NA        | NA      | NA     | NA      | NA       | NA      | 8  | 23.8 | 0.10338 | 0.60158 | 0.9991 | -0.396  | 0.6016 | 0.9991 | NA |
| 206 | P05114 | HMG1      | Non-histone chromatin protein                        | sp P05114 HMG1_HUMAN  | 4  | 43   | 0.5857978 | 0.14053 | 0.9984 | 1.181   | 0.14053  | 0.99836 | 5  | 47   | NA      | NA      | NA     | NA      | NA     | NA     | NA |
| 207 | P05141 | SLC25A5   | ADP/ATP translocase 5                                | sp P05141 ADT2_HUMAN  | 9  | 30.9 | 0.4006282 | 0.17355 | 0.9991 | 0.8257  | 0.00958  | 0.06292 | 13 | 36.9 | -0.0573 | 0.84131 | 0.9973 | -0.161  | 0.5753 | 0.6665 | 5  |
| 208 | P05186 | ALPL      | Alkaline phosphatase                                 | sp P05186 PPBT_HUMAN  | 4  | 8    | -0.091623 | 0.82359 | 0.9984 | 0.2016  | 0.82359  | 0.99836 | NA | NA   | NA      | NA      | NA     | NA      | NA     | NA     | NA |
| 209 | P05198 | EIF2S1    | Eukaryotic translation initiation factor 2 subunit 1 | sp P05198 IF2A_HUMAN  | 4  | 12.7 | -0.158688 | 0.59892 | 0.9991 | -0.0014 | 0.99662  | 0.99662 | 10 | 39.4 | -0.8854 | 0.00885 | 0.7846 | -1.4829 | 0.0001 | 0.0006 | 4  |
| 210 | P05386 | RPLP1     | 60S acidic ribosomal protein L1                      | sp P05386 RLA1_HUMAN  | 4  | 89.5 | -0.110846 | 0.72858 | 0.9991 | -1.0317 | 0.00989  | 0.06319 | 4  | 89.5 | 0.2622  | 0.41598 | 0.9973 | 1.11491 | 0.0028 | 0.0077 | 2  |
| 211 | P05387 | RPLP2     | 60S acidic ribosomal protein L2                      | sp P05387 RLA2_HUMAN  | 5  | 74.8 | 0.3040909 | 0.22276 | 0.9991 | -0.1253 | 0.60843  | 0.75813 | 6  | 74.8 | 0.15459 | 0.52831 | 0.9973 | 0.28941 | 0.2449 | 0.3295 | NA |
| 212 | P05388 | RPLP0     | 60S acidic ribosomal protein L0                      | sp P05388 RLA0_HUMAN  | 10 | 43.2 | -0.095054 | 0.77673 | 0.9991 | -0.5384 | 0.12152  | 0.2853  | 13 | 53.3 | 0.05038 | 0.88043 | 0.9973 | -0.4318 | 0.2083 | 0.2937 | NA |
| 213 | P05455 | SSB       | Lupus La protein                                     | sp P05455 LA_HUMAN    | 13 | 30.9 | 0.1799018 | 0.55391 | 0.9991 | 0.4373  | 0.1608   | 0.33626 | 17 | 42.4 | 0.97745 | 0.00457 | 0.6565 | 2.43286 | #####  | #####  | 1  |
| 214 | P05556 | ITGB1     | Integrin beta-1                                      | sp P05556 ITB1_HUMAN  | 8  | 10.8 | -0.278525 | 0.33691 | 0.9991 | -0.0314 | 0.91249  | 0.94965 | 14 | 21.4 | -0.3744 | 0.20184 | 0.9973 | -0.9639 | 0.0034 | 0.0089 | 4  |
| 215 | P06454 | PTMA      | Prothymosin alpha                                    | sp P06454 PTMA_HUMAN  | 7  | 37.8 | 0.1981903 | 0.36165 | 0.9991 | -0.1155 | 0.59193  | 0.7481  | 7  | 37.8 | -0.4325 | 0.05695 | 0.9973 | -0.7087 | 0.0039 | 0.0101 | 4  |
| 216 | P06493 | CDK1      | Cyclin-dependent kinase 1                            | sp P06493 CDK1_HUMAN  | 8  | 33   | -0.170674 | 0.45779 | 0.9991 | -0.2065 | 0.37085  | 0.57843 | 14 | 48.5 | -0.2299 | 0.32054 | 0.9973 | -0.2943 | 0.2079 | 0.2937 | NA |
| 217 | P06576 | ATP5F1B   | ATP synthase subunit F1, beta                        | sp P06576 ATPB_HUMAN  | 21 | 59.4 | -0.139508 | 0.57136 | 0.9991 | -0.0637 | 0.79534  | 0.89461 | 24 | 67.7 | 0.15911 | 0.51917 | 0.9973 | -1.0448 | 0.0005 | 0.0018 | 4  |
| 218 | P06730 | EIF4E     | Eukaryotic translation initiation factor 4E          | sp P06730 IF4E_HUMAN  | 3  | 18.4 | -0.201264 | NA      | NA     | NA      | NA       | NA      | 5  | 26.7 | 0.00977 | 0.96684 | 0.9991 | -0.5873 | 0.9668 | 0.9991 | NA |
| 219 | P06733 | ENO1      | Alpha-enolase                                        | sp P06733 ENOA_HUMAN  | 26 | 72.8 | -0.219407 | 0.24199 | 0.9991 | -0.9954 | 4.41E-05 | 0.00447 | 30 | 70.5 | 0.27688 | 0.14463 | 0.9973 | 0.61982 | 0.0033 | 0.0089 | 2  |
| 220 | P06737 | PYGL      | Glycogen phosphorylase (muscle form)                 | sp P06737 PYGL_HUMAN  | 5  | 8.9  | 0.0022877 | 0.99096 | 0.999  | -0.3105 | 0.99096  | 0.99899 | 6  | 9.6  | 0.15751 | NA      | NA     | NA      | NA     | NA     | NA |
| 221 | P06744 | GPI       | Glucose-6-phosphatase                                | sp P06744 G6P1_HUMAN  | 15 | 28.5 | 0.0702974 | 0.81611 | 0.9991 | -1.1051 | 0.00182  | 0.02746 | 17 | 36   | 0.13035 | 0.66696 | 0.9973 | 2.34144 | #####  | #####  | 2  |
| 222 | P06748 | NPM1      | Nucleophosmin                                        | sp P06748 NPM_HUMAN   | 13 | 53.7 | 0.1923145 | 0.39265 | 0.9991 | 0.404   | 0.0833   | 0.23529 | 14 | 57.1 | 0.16656 | 0.45781 | 0.9973 | 0.51516 | 0.0315 | 0.0585 | 1  |
| 223 | P06753 | TPM3      | Tropomyosin alpha-3                                  | sp P06753 TPM3_HUMAN  | 19 | 48.4 | -0.185646 | 0.55871 | 0.9991 | -0.6062 | 0.0686   | 0.20962 | 23 | 55.4 | 1.01917 | 0.00463 | 0.6565 | 3.33408 | #####  | #####  | 2  |
| 224 | P07099 | EPHX1     | Epoxide hydrolase 1                                  | sp P07099 HYEP_HUMAN  | 3  | 7.5  | 0.118861  | 0.8071  | 0.9984 | -0.2797 | 0.8071   | 0.99836 | NA | NA   | NA      | NA      | NA     | NA      | NA     | NA     | NA |
| 225 | P07108 | DBI       | Acyl-CoA-binding protein                             | sp P07108 ACBP_HUMAN  | 3  | 51.7 | -0.052133 | 0.86285 | 0.9984 | -1.3607 | 0.86285  | 0.99836 | 5  | 60.9 | NA      | NA      | NA     | NA      | NA     | NA     | NA |
| 226 | P07195 | LDHB      | L-lactate dehydrogenase B                            | sp P07195 LDHB_HUMAN  | 17 | 51.8 | 0.0997277 | 0.57355 | 0.9991 | -0.7345 | 0.00068  | 0.01867 | 17 | 59   | 0.10927 | 0.58117 | 0.9973 | 4.78954 | #####  | #####  | 2  |
| 227 | P07237 | P4HB      | Protein disulfide-isomerase P4                       | sp P07237 PDIA1_HUMAN | 23 | 54.3 | -0.030137 | 0.85527 | 0.9991 | 0.6208  | 0.00146  | 0.02711 | 33 | 68.3 | 0.06511 | 0.69409 | 0.9973 | -1.0359 | #####  | #####  | 5  |
| 228 | P07339 | CTSD      | Cathepsin D                                          | sp P07339 CATD_HUMAN  | 6  | 16   | -0.36317  | 0.36776 | 0.9984 | -0.0334 | 0.36776  | 0.99836 | 8  | 26.2 | NA      | NA      | NA     | NA      | NA     | NA     | NA |
| 229 | P07355 | ANXA2     | Annexin A2                                           | sp P07355 ANXA2_HUMAN | 13 | 46.3 | -0.145036 | 0.4544  | 0.9991 | -0.2334 | 0.235    | 0.43276 | 29 | 75.8 | 0.19826 | 0.31008 | 0.9973 | -0.9284 | 0.0001 | 0.0006 | 4  |
| 230 | P07384 | CAPN1     | Calpain-1 catalytic subunit                          | sp P07384 CAN1_HUMAN  | 5  | 8    | -0.26188  | NA      | NA     | NA      | NA       | NA      | 2  | 3.4  | NA      | NA      | NA     | NA      | NA     | NA     | NA |
| 231 | P07437 | TUBB      | Tubulin beta chain                                   | sp P07437 TBB5_HUMAN  | 17 | 43.9 | -0.09246  | 0.73834 | 0.9991 | -1.2585 | 0.00027  | 0.00995 | 22 | 64.6 | -0.3136 | 0.26571 | 0.9973 | 1.2455  | 0.0003 | 0.0012 | 2  |
| 232 | P07737 | PFN1      | Profilin-1                                           | sp P07737 PROF1_HUMAN | 11 | 91.4 | 0.0462088 | 0.85981 | 0.9991 | -1.2131 | 0.00022  | 0.00987 | 11 | 91.4 | 0.409   | 0.13141 | 0.9973 | 0.2072  | 0.4326 | 0.5252 | 3  |
| 233 | P07741 | APRT      | Adenine phosphoribosyltransferase                    | sp P07741 APT_HUMAN   | 2  | 13.3 | -0.018778 | 0.9368  | 0.999  | -0.985  | 0.9368   | 0.99899 | 6  | 44.4 | NA      | NA      | NA     | NA      | NA     | NA     | NA |
| 234 | P07814 | EPRS      | Bifunctional glutathione S-transferase               | sp P07814 SYEP_HUMAN  | 28 | 23.4 | 0.0686195 | 0.76127 | 0.9991 | 0.153   | 0.50062  | 0.67575 | 39 | 33   | -0.0364 | 0.8717  | 0.9973 | 1.57422 | #####  | #####  | 1  |
| 235 | P07900 | HSP90AA1  | Heat shock protein 90 alpha class A class 1 member 1 | sp P07900 HS90A_HUMAN | 44 | 61.1 | 0.1027725 | 0.59477 | 0.9991 | -0.6735 | 0.00256  | 0.03128 | 46 | 65.4 | -0.1737 | 0.37248 | 0.9973 | 1.22436 | #####  | #####  | 2  |
| 236 | P07910 | HNRNPC    | Heterogeneous nuclear ribonucleoprotein C            | sp P07910 HNRPC_HUMAN | 19 | 60.1 | 0.5275696 | 0.0105  | 0.9991 | 0.8062  | 0.00041  | 0.0133  | 16 | 54.2 | 0.13311 | 0.47634 | 0.9973 | 0.68358 | 0.0017 | 0.005  | 1  |

|     |        |          |                    |                       |    |      |           |           |         |         |         |         |         |      |         |         |         |         |         |        |        |    |
|-----|--------|----------|--------------------|-----------------------|----|------|-----------|-----------|---------|---------|---------|---------|---------|------|---------|---------|---------|---------|---------|--------|--------|----|
| 237 | P07942 | LAMB1    | Laminin subunit    | sp P07942 LAMB1_HUMAN | 2  | 1.3  | NA        | NA        | NA      | NA      | NA      | NA      | 10      | 8.6  | -0.3427 | 0.21515 | 0.9991  | -0.8864 | 0.2152  | 0.9991 | NA     |    |
| 238 | P07954 | FH       | Fumarate hydratase | sp P07954 FUMH_HUMAN  | 9  | 25.5 | -0.226037 | 0.33246   | 0.9991  | 0.5129  | 0.05991 | 0.19484 | 12      | 30.2 | -0.0401 | 0.86148 | 0.9973  | -0.199  | 0.3918  | 0.4865 | NA     |    |
| 239 | P08133 | ANXA6    | Annexin A6         | sp P08133 ANXA6_HUMAN | 5  | 10.3 | 0.3921825 | 0.35555   | 0.9991  | -1.36   | 0.00942 | 0.06292 | 14      | 25.7 | -0.0404 | 0.91389 | 0.9973  | -3.0326 | #####   | #####  | 4      |    |
| 240 | P08195 | SLC3A2   | 4F2 cell-surface   | sp P08195 4F2_HUMAN   | 4  | 10   | 23.7      | -0.057374 | 0.84391 | 0.9991  | 0.6813  | 0.03007 | 0.12709 | 11   | 25.7    | 0.07971 | 0.78455 | 0.9973  | 1.34862 | 0.0002 | 0.0009 | 1  |
| 241 | P08238 | HSP90AB1 | Heat shock prot    | sp P08238 HS90B_HUMAN | 50 | 64.1 | -0.125823 | 0.47631   | 0.9991  | -0.6031 | 0.00292 | 0.03391 | 54      | 69.3 | -0.0951 | 0.58916 | 0.9973  | -0.2896 | 0.1123  | 0.1731 | 3      |    |
| 242 | P08243 | ASNS     | Asparagine synt    | sp P08243 ASNS_HUMAN  | 5  | 12.7 | 0.1805083 | NA        | NA      | NA      | NA      | NA      | 7       | 13.9 | -0.5636 | NA      | NA      | NA      | NA      | NA     | NA     |    |
| 243 | P08397 | HMB5     | Porphobilinogen    | sp P08397 HEM3_HUMAN  | 3  | 8.3  | 0.4306566 | 0.226     | 0.9984  | 0.4442  | 0.226   | 0.99836 | 2       | 8.3  | NA      | NA      | NA      | NA      | NA      | NA     | NA     |    |
| 244 | P08559 | PDHA1    | Pyruvate dehyd     | sp P08559 ODPA_HUMAN  | 6  | 14.6 | -0.291192 | 0.3381    | 0.9984  | 0.328   | 0.3381  | 0.99836 | 3       | 7.7  | NA      | NA      | NA      | NA      | NA      | NA     | NA     |    |
| 245 | P08574 | CYC1     | Cytochrome c1,     | sp P08574 CY1_HUMAN   | 5  | 22.2 | 0.1272632 | 0.59804   | 0.9984  | 0.5379  | 0.59804 | 0.99836 | 4       | 15.7 | NA      | NA      | NA      | NA      | NA      | NA     | NA     |    |
| 246 | P08621 | SNRNP70  | U1 small nuclear   | sp P08621 RU17_HUMAN  | 4  | 12.4 | 0.1600065 | 0.61862   | 0.9991  | 0.3141  | 0.33366 | 0.53481 | 12      | 27.5 | -0.1064 | 0.74001 | 0.9973  | 0.17381 | 0.5889  | 0.6768 | NA     |    |
| 247 | P08670 | VIM      | Vimentin           | sp P08670 VIME_HUMAN  | 7  | 14.6 | 0.0669774 | 0.7953    | 0.9991  | 0.7059  | 0.007   | 0.05274 | 51      | 83.9 | 0.06176 | 0.78912 | 0.9973  | 0.13953 | 0.5477  | 0.6397 | 5      |    |
| 248 | P08708 | RPS17    | 40S ribosomal p    | sp P08708 RS17_HUMAN  | 4  | 9    | 62.2      | 0.2241301 | 0.52623 | 0.9991  | -0.7214 | 0.05314 | 0.18027 | 8    | 62.2    | 0.3075  | 0.38716 | 0.9973  | -0.0492 | 0.8888 | 0.908  | NA |
| 249 | P08758 | ANXA5    | Annexin A5         | sp P08758 ANXA5_HUMAN | 13 | 43.8 | -0.703192 | 0.06919   | 0.9991  | -1.5771 | 0.00046 | 0.01422 | 16      | 53.8 | -0.1175 | 0.74929 | 0.9973  | 0.26111 | 0.4804  | 0.5723 | 3      |    |
| 250 | P08865 | RPSA     | 40S ribosomal p    | sp P08865 RSSA_HUMAN  | 12 | 52.5 | 0.1770305 | 0.32893   | 0.9991  | -0.2108 | 0.24781 | 0.44594 | 12      | 52.5 | 0.0156  | 0.93041 | 0.9973  | -1.168  | #####   | #####  | 4      |    |
| 251 | P09012 | SNRPA    | U1 small nuclear   | sp P09012 SNRPA_HUMAN | 6  | 22   | -0.272892 | 0.31494   | 0.9991  | -0.1712 | 0.52455 | 0.69224 | 7       | 27.7 | -0.4049 | 0.1431  | 0.9973  | 0.34362 | 0.2098  | 0.2948 | NA     |    |
| 252 | P09038 | FGF2     | Fibroblast grow    | sp P09038 FGF2_HUMAN  | 3  | 9.7  | 0.0892984 | 0.80778   | 0.9984  | 0.758   | 0.80778 | 0.99836 | NA      | NA   | NA      | NA      | NA      | NA      | NA      | NA     | NA     |    |
| 253 | P09211 | GSTP1    | Glutathione S-tr   | sp P09211 GSTP1_HUMAN | 13 | 70.5 | -0.001004 | 0.99872   | 0.9993  | -1.8167 | 0.99872 | 0.99926 | 9       | 49   | NA      | NA      | NA      | NA      | NA      | NA     | NA     |    |
| 254 | P09417 | QDPR     | Dihydropteridin    | sp P09417 DHPR_HUMAN  | 3  | 18.4 | -0.052716 | NA        | NA      | NA      | NA      | NA      | 6       | 34.8 | 0.08425 | 0.74969 | 0.9991  | 0.64599 | 0.7497  | 0.9991 | NA     |    |
| 255 | P09429 | HMGB1    | High mobility gr   | sp P09429 HMGB1_HUMA  | 8  | 32.6 | 0.1241136 | 0.68659   | 0.9991  | -0.3275 | 0.29419 | 0.49544 | 12      | 50.2 | -0.121  | 0.69392 | 0.9973  | 1.77134 | #####   | 0.0001 | 2      |    |
| 256 | P09493 | TPM1     | Tropomyosin alp    | sp P09493 TPM1_HUMAN  | 19 | 55.6 | 0.1868024 | 0.43613   | 0.9984  | 0.1366  | 0.43613 | 0.99836 | 13      | 32.4 | NA      | NA      | NA      | NA      | NA      | NA     | NA     |    |
| 257 | P09496 | CLTA     | Clathrin light ch  | sp P09496 CLCA_HUMAN  | 5  | 16.5 | -0.080129 | 0.79363   | 0.9991  | -0.5598 | 0.18731 | 0.3689  | 7       | 16.5 | -0.5714 | 0.05252 | 0.9973  | 0.68683 | 0.0234  | 0.0458 | 2      |    |
| 258 | P09622 | DLD      | Dihydrolipoyl de   | sp P09622 DLDH_HUMAN  | 8  | 17.3 | 0.0764109 | 0.66062   | 0.9991  | 0.5243  | 0.00721 | 0.05274 | 10      | 29.1 | 0.26327 | 0.14251 | 0.9973  | 0.43667 | 0.0209  | 0.0415 | 1      |    |
| 259 | P09651 | HNRNPA1  | Heterogeneous      | sp P09651 ROA1_HUMAN  | 17 | 40.6 | -0.466346 | 0.23532   | 0.9991  | -0.3883 | 0.3199  | 0.51783 | 19      | 48.1 | 0.06532 | 0.8651  | 0.9973  | 1.7231  | 0.0003  | 0.0012 | 2      |    |
| 260 | P09661 | SNRPA1   | U2 small nuclear   | sp P09661 RU2A_HUMAN  | 3  | 19.2 | NA        | NA        | NA      | NA      | NA      | NA      | 6       | 43.5 | -0.2014 | 0.6932  | 0.9991  | 1.83367 | 0.6932  | 0.9991 | NA     |    |
| 261 | P09669 | COX6C    | Cytochrome c ox    | sp P09669 COX6C_HUMAN | 3  | 29.3 | 0.6424912 | NA        | NA      | NA      | NA      | NA      | NA      | NA   | NA      | NA      | NA      | NA      | NA      | NA     | NA     |    |
| 262 | P09874 | PARP1    | Poly [ADP-ribose   | sp P09874 PARP1_HUMAN | 32 | 35.9 | 0.0055248 | 0.98124   | 0.9991  | 0.212   | 0.37284 | 0.57843 | 32      | 37   | 0.14779 | 0.53191 | 0.9973  | 2.31806 | #####   | #####  | 1      |    |
| 263 | P09936 | UCHL1    | Ubiquitin carbox   | sp P09936 UCHL1_HUMAN | 12 | 57.4 | 0.0757996 | 0.79284   | 0.9991  | -0.9829 | 0.00363 | 0.03699 | 15      | 83.4 | 0.51213 | 0.22143 | 0.9973  | 7.68301 | #####   | #####  | 2      |    |
| 264 | P09960 | LTA4H    | Leukotriene A-4    | sp P09960 LKHA4_HUMAN | 13 | 26.2 | -0.046711 | 0.83382   | 0.9984  | -0.4886 | 0.83382 | 0.99836 | 11      | 23.2 | NA      | NA      | NA      | NA      | NA      | NA     | NA     |    |
| 265 | P09972 | ALDOC    | Fructose-bisphos   | sp P09972 ALDOC_HUMAN | 5  | 25.5 | 0.2527065 | NA        | NA      | NA      | NA      | NA      | 10      | 36.5 | -0.1821 | 0.80532 | 0.9991  | 1.77515 | 0.8053  | 0.9991 | NA     |    |
| 266 | Q71UI9 | H2AFV    | Histone H2A.V      | sp Q71UI9 H2AV_HUMAN  | 5  | 31.2 | 0.5477235 | 0.22309   | 0.9991  | 0.3309  | 0.45506 | 0.64015 | 6       | 53.9 | 0.62535 | 0.16708 | 0.9973  | 2.42658 | #####   | 0.0002 | 1      |    |
| 267 | P0CG35 | TMSB15B  | Thymosin beta-4    | sp P0CG35 TB15B_HUMAN | 2  | 40   | 0.6709544 | 0.01493   | 0.9984  | -0.3646 | 0.01493 | 0.99836 | NA      | NA   | NA      | NA      | NA      | NA      | NA      | NA     | NA     |    |
| 268 | P62987 | UBA52    | Ubiquitin-60S rib  | sp P62987 RL40_HUMAN  | 6  | 43   | -0.004137 | 0.98076   | 0.9991  | 0.2771  | 0.12011 | 0.2853  | 7       | 47.4 | 0.16015 | 0.35703 | 0.9973  | -0.2451 | 0.1658  | 0.2429 | NA     |    |
| 269 | P0DMV9 | HSPA1B   | Heat shock 70 k    | sp P0DMV9 HS71B_HUMA  | 17 | 35.1 | -0.132933 | 0.47877   | 0.9984  | 0.2599  | 0.47877 | 0.99836 | 33      | 68.8 | NA      | NA      | NA      | NA      | NA      | NA     | NA     |    |
| 270 | P0DN76 | U2AF1L5  | Splicing factor U  | sp P0DN76 U2AF5_HUMA  | 2  | 15   | NA        | NA        | NA      | NA      | NA      | NA      | 4       | 25.8 | NA      | NA      | NA      | NA      | -0.5205 | NA     | NA     | NA |
| 271 | P35520 | CBS      | Cystathionine be   | sp P35520 CBS_HUMAN   | 9  | 20.7 | 0.1552582 | 0.45484   | 0.9984  | -0.0986 | 0.45484 | 0.99836 | 3       | 6.2  | NA      | NA      | NA      | NA      | NA      | NA     | NA     |    |
| 272 | P0DP25 | CALM3    | Calmodulin-3       | sp P0DP25 CALM3_HUMA  | 10 | 70.5 | -0.02015  | 0.93831   | 0.9991  | -0.1763 | 0.50133 | 0.67575 | 12      | 85.2 | 0.08331 | 0.74937 | 0.9973  | 0.4446  | 0.1017  | 0.1603 | NA     |    |
| 273 | P10412 | HIST1H1E | Histone H1.4       | sp P10412 H14_HUMAN   | 6  | 29.2 | NA        | NA        | NA      | NA      | NA      | NA      | 9       | 37   | -0.3583 | 0.21713 | 0.9991  | 1.94857 | 0.2171  | 0.9991 | NA     |    |
| 274 | P10515 | DLAT     | Dihydrolipoyllys   | sp P10515 ODP2_HUMAN  | 7  | 12.4 | 0.4686035 | 0.06584   | 0.9984  | 0.7339  | 0.06584 | 0.99836 | 5       | 9.6  | 0.00198 | NA      | NA      | NA      | NA      | NA     | NA     |    |
| 275 | P10599 | TXN      | Thioredoxin        | sp P10599 THIO_HUMAN  | 4  | 38.1 | 0.2512582 | 0.39643   | 0.9984  | -0.1019 | 0.39643 | 0.99836 | 5       | 46.7 | NA      | NA      | NA      | NA      | NA      | NA     | NA     |    |
| 276 | P10606 | COX5B    | Cytochrome c ox    | sp P10606 COX5B_HUMAN | 4  | 30.2 | 0.4048637 | 0.31198   | 0.9984  | 0.4973  | 0.31198 | 0.99836 | 4       | 30.2 | NA      | NA      | NA      | NA      | NA      | NA     | NA     |    |
| 277 | P10620 | MGST1    | Microsomal glut    | sp P10620 MGST1_HUMA  | 4  | 42.6 | -0.387348 | 0.25027   | 0.9984  | 0.5893  | 0.25027 | 0.99836 | NA      | NA   | NA      | NA      | NA      | NA      | NA      | NA     | NA     |    |
| 278 | P10768 | ESD      | S-formylglutathi   | sp P10768 ESTD_HUMAN  | 5  | 24.5 | 0.1721963 | NA        | NA      | NA      | NA      | NA      | 7       | 36.9 | NA      | NA      | NA      | NA      | NA      | NA     | NA     |    |
| 279 | P10809 | HSPD1    | 60 kDa heat sho    | sp P10809 CH60_HUMAN  | 34 | 69.6 | -0.100582 | 0.51497   | 0.9991  | 0.3042  | 0.06091 | 0.19558 | 40      | 79.1 | 0.0917  | 0.55233 | 0.9973  | 0.77039 | 0.0001  | 0.0005 | 1      |    |
| 280 | P11047 | LAMC1    | Laminin subunit    | sp P11047 LAMC1_HUMAN | 5  | 3.9  | NA        | NA        | NA      | NA      | NA      | NA      | 13      | 10.8 | 0.09007 | 0.73132 | 0.9991  | -0.0574 | 0.7313  | 0.9991 | NA     |    |
| 281 | P11142 | HSPA8    | Heat shock cogn    | sp P11142 HSP7C_HUMAN | 43 | 66.1 | 0.0017076 | 0.99247   | 0.9991  | -0.1528 | 0.40376 | 0.60515 | 46      | 77.6 | 0.03232 | 0.85831 | 0.9973  | -0.6577 | 0.0019  | 0.0055 | 4      |    |
| 282 | P11166 | SLC2A1   | Solute carrier fa  | sp P11166 GTR1_HUMAN  | 3  | 7.7  | -0.77599  | 0.02478   | 0.9984  | 0.1789  | 0.02478 | 0.99836 | 3       | 7.7  | NA      | NA      | NA      | NA      | NA      | NA     | NA     |    |
| 283 | P11169 | SLC2A3   | Solute carrier fa  | sp P11169 GTR3_HUMAN  | 6  | 13.1 | -0.19015  | 0.31291   | 0.9984  | 0.8211  | 0.31291 | 0.99836 | NA      | NA   | NA      | NA      | NA      | NA      | NA      | NA     | NA     |    |
| 284 | P11177 | PDHB     | Pyruvate dehyd     | sp P11177 ODPB_HUMAN  | 6  | 18.1 | 0.0110086 | 0.96394   | 0.9991  | 0.3877  | 0.12597 | 0.28904 | 5       | 17.3 | 0.4279  | 0.09384 | 0.9973  | 0.33957 | 0.2238  | 0.3074 | NA     |    |

|     |        |         |                                            |                       |    |      |           |         |        |         |          |         |    |      |         |         |        |         |        |        |    |
|-----|--------|---------|--------------------------------------------|-----------------------|----|------|-----------|---------|--------|---------|----------|---------|----|------|---------|---------|--------|---------|--------|--------|----|
| 285 | P11216 | PYGB    | Glycogen phosphatase                       | sp P11216 PYGB_HUMAN  | 5  | 9.4  | 0.0833934 | 0.86442 | 0.9991 | 0.0036  | 0.99473  | 0.99662 | 9  | 14.4 | 0.32747 | 0.50569 | 0.9973 | -2.9092 | #####  | 0.0004 | 4  |
| 286 | P11279 | LAMP1   | Lysosome-associated membrane protein 1     | sp P11279 LAMP1_HUMAN | 3  | 3.6  | -0.043909 | 0.85567 | 0.9984 | -0.3205 | 0.85567  | 0.99836 | 5  | 10.3 | NA      | NA      | NA     | NA      | NA     | NA     | NA |
| 287 | P11310 | ACADM   | Medium-chain acyl-CoA dehydrogenase        | sp P11310 ACADM_HUMAN | 5  | 18.8 | -0.529681 | NA      | NA     | NA      | NA       | NA      | 5  | 15.4 | NA      | NA      | NA     | NA      | NA     | NA     | NA |
| 288 | P11387 | TOP1    | DNA topoisomerase (theta class)            | sp P11387 TOP1_HUMAN  | 16 | 23   | 0.154543  | 0.6779  | 0.9991 | 0.6117  | 0.11318  | 0.27928 | 17 | 26.5 | 0.08357 | 0.82196 | 0.9973 | 4.55437 | #####  | #####  | 1  |
| 289 | P11388 | TOP2A   | DNA topoisomerase (alpha class)            | sp P11388 TOP2A_HUMAN | 37 | 27.4 | 0.0994441 | 0.56305 | 0.9991 | 0.6123  | 0.00216  | 0.02915 | 21 | 17.4 | -0.1645 | 0.34312 | 0.9973 | -2.316  | #####  | #####  | 4  |
| 290 | P11413 | G6PD    | Glucose-6-phosphate dehydrogenase          | sp P11413 G6PD_HUMAN  | 3  | 6.4  | 0.971423  | 0.10286 | 0.9991 | 0.242   | 0.6697   | 0.80752 | 15 | 38.3 | 0.2336  | 0.74439 | 0.9973 | 5.26071 | #####  | #####  | 1  |
| 291 | P11586 | MTHFD1  | C-1-tetrahydrofolate dehydrogenase         | sp P11586 C1TC_HUMAN  | 29 | 38.3 | 0.0571115 | 0.81624 | 0.9991 | -0.9245 | 0.00145  | 0.02711 | 25 | 35   | 0.17357 | 0.48307 | 0.9973 | 1.75245 | #####  | #####  | 2  |
| 292 | P11766 | ADH5    | Alcohol dehydrogenase (class I)            | sp P11766 ADHX_HUMAN  | 10 | 27.3 | 0.1899945 | 0.3514  | 0.9984 | -0.5459 | 0.3514   | 0.99836 | 14 | 32.9 | -0.1994 | NA      | NA     | NA      | NA     | NA     | NA |
| 293 | P11908 | PRPS2   | Ribose-phosphate synthase (cytosolic)      | sp P11908 PRPS2_HUMAN | 4  | 15.7 | NA        | NA      | NA     | NA      | NA       | NA      | 5  | 23.3 | 0.0424  | 0.92169 | 0.9991 | -0.7584 | 0.9217 | 0.9991 | NA |
| 294 | P11940 | PABPC1  | Polyadenylate-binding protein 1            | sp P11940 PABP1_HUMAN | 22 | 44   | -0.039889 | 0.81738 | 0.9991 | 0.0712  | 0.68077  | 0.81669 | 27 | 51.6 | 0.07752 | 0.65435 | 0.9973 | -0.3842 | 0.0378 | 0.0685 | 4  |
| 295 | P12004 | PCNA    | Proliferating cell nuclear antigen         | sp P12004 PCNA_HUMAN  | 13 | 64.8 | 0.1560578 | 0.32576 | 0.9991 | -0.1541 | 0.33174  | 0.53334 | 16 | 74.7 | -0.0767 | 0.62499 | 0.9973 | 0.3144  | 0.0577 | 0.0991 | NA |
| 296 | P12081 | HARS    | Histidine-tRNA synthetase                  | sp P12081 SYHC_HUMAN  | 3  | 5.9  | NA        | NA      | NA     | NA      | NA       | NA      | 14 | 28.5 | 0.29238 | 0.39902 | 0.9991 | 0.7986  | 0.399  | 0.9991 | NA |
| 297 | P12236 | SLC25A6 | ADP/ATP translocase 6                      | sp P12236 ADT3_HUMAN  | 9  | 30.9 | -0.134256 | 0.39522 | 0.9984 | 0.2189  | 0.39522  | 0.99836 | 12 | 45.6 | NA      | NA      | NA     | NA      | NA     | NA     | NA |
| 298 | P12268 | IMPDH2  | Inosine-5-monophosphate dehydrogenase 2    | sp P12268 IMDH2_HUMAN | 13 | 30.2 | -0.242938 | 0.19463 | 0.9991 | -0.6414 | 0.00579  | 0.04664 | 15 | 36.4 | -0.0649 | 0.72215 | 0.9973 | -0.8725 | 0.0002 | 0.0008 | 3  |
| 299 | P12270 | TPR     | Nucleoprotein TPR                          | sp P12270 TPR_HUMAN   | 29 | 15.2 | 0.0324959 | 0.89953 | 0.9991 | 0.8222  | 0.00496  | 0.0419  | 40 | 21.1 | 0.13717 | 0.59558 | 0.9973 | 0.45662 | 0.09   | 0.1457 | 1  |
| 300 | P12277 | CKB     | Creatine kinase (b)                        | sp P12277 KCRB_HUMAN  | 15 | 47.5 | 0.1023328 | 0.80999 | 0.9984 | -1.3136 | 0.80999  | 0.99836 | 19 | 65.4 | NA      | NA      | NA     | 4.88944 | NA     | NA     | NA |
| 301 | P12429 | ANXA3   | Annexin A3                                 | sp P12429 ANXA3_HUMAN | 6  | 26   | -0.035262 | NA      | NA     | NA      | NA       | NA      | 1  | 2.8  | NA      | NA      | NA     | NA      | NA     | NA     | NA |
| 302 | P12532 | CKMT1A  | Creatine kinase (mitochondrial)            | sp P12532 KCRU_HUMAN  | 2  | 4.6  | 0.2043584 | NA      | NA     | NA      | NA       | NA      | 12 | 45.6 | NA      | NA      | NA     | NA      | NA     | NA     | NA |
| 303 | P12814 | ACTN1   | Alpha-actinin-1                            | sp P12814 ACTN1_HUMAN | 24 | 36.8 | 0.033231  | 0.85824 | 0.9991 | -0.3143 | 0.10498  | 0.27366 | 38 | 54.1 | -0.0439 | 0.81373 | 0.9973 | 0.12718 | 0.4972 | 0.5865 | NA |
| 304 | P12830 | CDH1    | Cadherin-1                                 | sp P12830 CADH1_HUMAN | 3  | 3.6  | NA        | NA      | NA     | 0.6329  | NA       | NA      | NA | NA   | NA      | NA      | NA     | NA      | NA     | NA     | NA |
| 305 | P12955 | PEPD    | Xaa-Pro dipeptidase                        | sp P12955 PEPD_HUMAN  | 4  | 8.7  | 0.3817417 | 0.16415 | 0.9984 | 0.0024  | 0.16415  | 0.99836 | 5  | 14.4 | NA      | NA      | NA     | NA      | NA     | NA     | NA |
| 306 | P12956 | XRCC6   | X-ray repair cross-complementing factor 6  | sp P12956 XRCC6_HUMAN | 26 | 52.9 | -0.007406 | 0.97756 | 0.999  | -0.18   | 0.97756  | 0.99899 | 28 | 51.6 | NA      | NA      | NA     | 7.75173 | NA     | NA     | NA |
| 307 | P13010 | XRCC5   | X-ray repair cross-complementing factor 5  | sp P13010 XRCC5_HUMAN | 25 | 44.5 | 0.194584  | 0.22954 | 0.9984 | 0.0635  | 0.22954  | 0.99836 | 29 | 54.6 | NA      | NA      | NA     | NA      | NA     | NA     | NA |
| 308 | P13073 | COX41   | Cytochrome c oxidase subunit 4             | sp P13073 COX41_HUMAN | 5  | 32.5 | 0.0115615 | 0.97267 | 0.999  | 0.2704  | 0.97267  | 0.99899 | 6  | 30.2 | NA      | NA      | NA     | NA      | NA     | NA     | NA |
| 309 | P13639 | EEF2    | Elongation factor 2                        | sp P13639 EF2_HUMAN   | 42 | 53.8 | -0.239822 | 0.2221  | 0.9991 | -1.1793 | 1.07E-05 | 0.00239 | 49 | 61.1 | 0.13877 | 0.47305 | 0.9973 | -0.28   | 0.1573 | 0.2319 | 3  |
| 310 | P13667 | PDIA4   | Protein disulfide isomerase A4             | sp P13667 PDIA4_HUMAN | 30 | 50.4 | 0.0921677 | 0.62496 | 0.9991 | 0.4008  | 0.04536  | 0.16324 | 28 | 49.9 | -0.116  | 0.53943 | 0.9973 | 0.85714 | 0.0003 | 0.0011 | 1  |
| 311 | P13674 | P4HA1   | Prolyl 4-hydroxylase                       | sp P13674 P4HA1_HUMAN | 5  | 11   | -1.37003  | 0.03042 | 0.9991 | -0.5258 | 0.372    | 0.57843 | 11 | 27.7 | 0.02085 | 0.9595  | 0.9973 | -0.0931 | 0.8207 | 0.8532 | 3  |
| 312 | P13693 | TPT1    | Translationally controlled protein 1       | sp P13693 TCTP_HUMAN  | 4  | 20.9 | NA        | NA      | NA     | NA      | NA       | NA      | 9  | 42.4 | 0.55129 | 0.10847 | 0.9991 | 1.33487 | 0.1085 | 0.9991 | NA |
| 313 | P13797 | PLS3    | Plastin-3                                  | sp P13797 PLST_HUMAN  | 13 | 24.3 | 0.2593288 | 0.22319 | 0.9991 | -0.6293 | 0.01448  | 0.07961 | 13 | 26.3 | 0.33041 | 0.12615 | 0.9973 | -0.4301 | 0.0521 | 0.0906 | 3  |
| 314 | P13798 | APEH    | Acylamino-acid esterase                    | sp P13798 ACPH_HUMAN  | 11 | 18.2 | 0.0572208 | 0.76996 | 0.9984 | -0.4799 | 0.76996  | 0.99836 | 4  | 6.6  | NA      | NA      | NA     | NA      | NA     | NA     | NA |
| 315 | P13804 | ETFA    | Electron transfer flavin acceptor          | sp P13804 ETFA_HUMAN  | 9  | 37.8 | -0.125697 | 0.52997 | 0.9984 | 0.1058  | 0.52997  | 0.99836 | 13 | 56.8 | NA      | NA      | NA     | NA      | NA     | NA     | NA |
| 316 | P13984 | GTF2F2  | General transcription factor 2             | sp P13984 T2FB_HUMAN  | 2  | 8.8  | NA        | NA      | NA     | NA      | NA       | NA      | 4  | 16.9 | -0.0559 | 0.84586 | 0.9991 | 0.35061 | 0.8459 | 0.9991 | NA |
| 317 | P14174 | MIF     | Macrophage migration inhibitory factor     | sp P14174 MIF_HUMAN   | 2  | 17.4 | -0.411429 | 0.34062 | 0.9984 | -0.1614 | 0.34062  | 0.99836 | 3  | 35.7 | NA      | NA      | NA     | NA      | NA     | NA     | NA |
| 318 | P14314 | PRKCSH  | Glucosidase 2 subunit                      | sp P14314 GLU2B_HUMAN | 11 | 21   | -0.12271  | 0.72839 | 0.9991 | 0.2346  | 0.50885  | 0.68136 | 17 | 37.9 | 0.21629 | 0.54208 | 0.9973 | 4.76379 | #####  | #####  | 1  |
| 319 | P14324 | FDPS    | Farnesyl pyrophosphatase                   | sp P14324 FPPS_HUMAN  | 5  | 14.3 | -0.295937 | 0.26857 | 0.9984 | -1.3852 | 0.26857  | 0.99836 | 5  | 14.3 | NA      | NA      | NA     | NA      | NA     | NA     | NA |
| 320 | P14550 | AKR1A1  | Aldo-keto reductase family 1 member A1     | sp P14550 AK1A1_HUMAN | 7  | 28   | 0.0561529 | 0.79115 | 0.9991 | -0.5566 | 0.03012  | 0.12709 | 11 | 45.5 | 0.04337 | 0.83784 | 0.9973 | -1.234  | #####  | 0.0002 | 4  |
| 321 | P14618 | PKM     | Pyruvate kinase (muscle)                   | sp P14618 KPYM_HUMAN  | 34 | 65.5 | 0.0016644 | 0.9934  | 0.9991 | -1.1104 | 3.65E-05 | 0.00432 | 41 | 76.5 | 0.05095 | 0.80033 | 0.9973 | -0.1096 | 0.5877 | 0.6765 | 3  |
| 322 | P14625 | HSP90B1 | Endoplasmic reticulum chaperone            | sp P14625 ENPL_HUMAN  | 42 | 51.7 | -0.128611 | 0.38569 | 0.9991 | 0.5414  | 0.00168  | 0.02746 | 44 | 58.8 | 0.0044  | 0.97602 | 0.9973 | -0.4411 | 0.0074 | 0.017  | 5  |
| 323 | P14635 | CCNB1   | G2/mitotic-specific cyclin B1              | sp P14635 CCNB1_HUMAN | 2  | 4.8  | 0.4332965 | NA      | NA     | NA      | NA       | NA      | 1  | 3    | NA      | NA      | NA     | NA      | NA     | NA     | NA |
| 324 | P14735 | IDE     | Insulin-degrading enzyme                   | sp P14735 IDE_HUMAN   | 5  | 5.6  | -0.205008 | NA      | NA     | NA      | NA       | NA      | 8  | 9.2  | -0.12   | NA      | NA     | NA      | NA     | NA     | NA |
| 325 | P14866 | HNRNPL  | Heterogeneous nuclear ribonucleoprotein L  | sp P14866 HNRPL_HUMAN | 18 | 45.7 | 0.2204447 | 0.26721 | 0.9991 | 0.3619  | 0.0772   | 0.22519 | 19 | 46.9 | 0.16256 | 0.40918 | 0.9973 | 0.11611 | 0.5535 | 0.6454 | NA |
| 326 | P14868 | DARS    | Aspartate-tRNA ligase                      | sp P14868 SYDC_HUMAN  | 15 | 34.5 | 0.1480266 | 0.45848 | 0.9991 | -0.0126 | 0.95462  | 0.96897 | 18 | 42.7 | 0.07239 | 0.71504 | 0.9973 | 0.21666 | 0.2828 | 0.3679 | NA |
| 327 | P15121 | AKR1B1  | Aldo-keto reductase family 1 member B1     | sp P15121 ALDR_HUMAN  | 4  | 13.9 | 0.3509399 | 0.31031 | 0.9991 | -0.5841 | 0.13179  | 0.29758 | 8  | 25.6 | 0.31887 | 0.30297 | 0.9973 | -0.5173 | 0.1044 | 0.1638 | NA |
| 328 | P63000 | RAC1    | Ras-related C3 domain protein 1            | sp P63000 RAC1_HUMAN  | 2  | 10.9 | NA        | NA      | NA     | NA      | NA       | NA      | 7  | 43.2 | 0.17321 | 0.43634 | 0.9991 | 0.87262 | 0.4363 | 0.9991 | NA |
| 329 | P15170 | GSPT1   | Eukaryotic translation initiation factor 1 | sp P15170 ERF3A_HUMAN | 8  | 21.8 | 0.0908704 | 0.62314 | 0.9991 | -0.2196 | 0.24333  | 0.44232 | 13 | 30.7 | 0.12701 | 0.49373 | 0.9973 | 0.12023 | 0.5168 | 0.6086 | NA |
| 330 | P15311 | EZR     | Ezrin                                      | sp P15311 EZRI_HUMAN  | 26 | 44.2 | -0.061206 | 0.76705 | 0.9991 | -0.734  | 0.00227  | 0.02957 | 16 | 27.6 | -0.0427 | 0.83624 | 0.9973 | -0.8865 | 0.0005 | 0.0017 | 3  |
| 331 | P15374 | UCHL3   | Ubiquitin carboxyl-terminal hydrolase 3    | sp P15374 UCHL3_HUMAN | 5  | 30   | 0.7717067 | NA      | NA     | NA      | NA       | NA      | 5  | 31.3 | NA      | NA      | NA     | NA      | NA     | NA     | NA |
| 332 | P15531 | NME1    | Nucleoside diphosphate kinase 1            | sp P15531 NDKA_HUMAN  | 8  | 55.3 | 0.0001923 | 0.99938 | 0.9994 | -0.4953 | 0.05787  | 0.18907 | 10 | 78.9 | 0.54746 | 0.03821 | 0.9973 | 1.95601 | #####  | #####  | 2  |

|     |        |          |                    |                       |    |    |      |           |         |        |         |         |         |    |      |         |         |        |         |        |        |    |
|-----|--------|----------|--------------------|-----------------------|----|----|------|-----------|---------|--------|---------|---------|---------|----|------|---------|---------|--------|---------|--------|--------|----|
| 333 | P15880 | RPS2     | 40S ribosomal p    | sp P15880 RS2_HUMAN   | 4  | 13 | 48.5 | 0.001913  | 0.99369 | 0.9991 | -0.442  | 0.08156 | 0.23223 | 13 | 47.8 | 0.24016 | 0.3279  | 0.9973 | -0.747  | 0.0062 | 0.0149 | 4  |
| 334 | P15927 | RPA2     | Replication prot   | sp P15927 RFA2_HUMAN  | 4  | 4  | 23.7 | 0.3206292 | 0.28314 | 0.9984 | 0.3332  | 0.28314 | 0.99836 | 4  | 23.7 | 0.07096 | NA      | NA     | NA      | NA     | NA     | NA |
| 335 | P15954 | COX7C    | Cytochrome c ox    | sp P15954 COX7C_HUMAN | 2  | 2  | 28.6 | 0.1621164 | 0.45707 | 0.9991 | 0.8081  | 0.00167 | 0.02746 | 2  | 28.6 | -0.0282 | 0.89627 | 0.9973 | -0.9487 | 0.0011 | 0.0036 | 5  |
| 336 | P16083 | NQO2     | Ribosylidihydro    | sp P16083 NQO2_HUMAN  | 5  | 5  | 34.2 | 0.1111756 | 0.71499 | 0.9984 | -0.1541 | 0.71499 | 0.99836 | NA | NA   | NA      | NA      | NA     | NA      | NA     | NA     | NA |
| 337 | P16104 | H2AFX    | Histone H2AX       | sp P16104 H2AX_HUMAN  | 6  | 6  | 37.8 | NA        | NA      | NA     | NA      | NA      | NA      | 8  | 63.6 | 0.25704 | 0.234   | 0.9991 | 1.34736 | 0.234  | 0.9991 | NA |
| 338 | P16152 | CBR1     | Carbonyl reduct    | sp P16152 CBR1_HUMAN  | 9  | 9  | 51.3 | 0.1290811 | 0.80126 | 0.9991 | -1.0026 | 0.09852 | 0.26094 | 14 | 63.2 | 0.55225 | 0.4769  | 0.9973 | 3.21039 | #####  | 0.0004 | 2  |
| 339 | P16401 | HIST1H1B | Histone H1.5       | sp P16401 H15_HUMAN   | 7  | 7  | 31.9 | 0.3951639 | 0.40047 | 0.9991 | 0.8281  | 0.08884 | 0.24227 | 8  | 31.4 | -0.4883 | 0.30157 | 0.9973 | 5.03875 | #####  | #####  | 1  |
| 340 | P10412 | HIST1H1E | Histone H1.4       | sp P10412 H14_HUMAN   | 6  | 6  | 29.2 | NA        | NA      | NA     | NA      | NA      | NA      | 9  | 37   | -0.3583 | 0.21713 | 0.9991 | 1.94857 | 0.2171 | 0.9991 | NA |
| 341 | P16403 | HIST1H1C | Histone H1.2       | sp P16403 H12_HUMAN   | 6  | 6  | 30   | 0.6184023 | 0.11797 | 0.9984 | 0.8605  | 0.11797 | 0.99836 | 8  | 34.3 | NA      | NA      | NA     | NA      | NA     | NA     | NA |
| 342 | P16422 | EPCAM    | Epithelial cell ac | sp P16422 EPCAM_HUMA  | 5  | 5  | 22.3 | 0.1386749 | 0.58905 | 0.9984 | 0.8398  | 0.58905 | 0.99836 | NA | NA   | NA      | NA      | NA     | NA      | NA     | NA     | NA |
| 343 | P16435 | POR      | NADPH-cytochr      | sp P16435 NCP_R_HUMAN | 6  | 6  | 9.6  | 0.1959273 | 0.47115 | 0.9984 | 0.6838  | 0.47115 | 0.99836 | 1  | 1.9  | NA      | NA      | NA     | NA      | NA     | NA     | NA |
| 344 | P16615 | ATP2A2   | Sarcoplasmic/en    | sp P16615 AT2A2_HUMAN | 16 | 16 | 19.8 | 0.0071777 | 0.97278 | 0.9991 | 0.4991  | 0.0281  | 0.12299 | 20 | 25   | 0.02543 | 0.9038  | 0.9973 | -1.4758 | #####  | #####  | 5  |
| 345 | P16949 | STMN1    | Stathmin           | sp P16949 STMN1_HUMA  | 8  | 8  | 51.7 | 0.2836435 | 0.44802 | 0.9991 | -0.7212 | 0.06518 | 0.20269 | 9  | 51.7 | 0.06649 | 0.85765 | 0.9973 | 4.57461 | #####  | #####  | 2  |
| 346 | P16989 | YBX3     | Y-box-binding pr   | sp P16989 YBOX3_HUMAN | 8  | 8  | 31.5 | 0.3428282 | 0.37679 | 0.9984 | 0.7833  | 0.37679 | 0.99836 | 5  | 13.7 | NA      | NA      | NA     | NA      | NA     | NA     | NA |
| 347 | P17096 | HMGGA1   | High mobility gr   | sp P17096 HMGGA1_HUMA | 5  | 5  | 47.7 | 0.3816649 | 0.43154 | 0.9991 | 1.201   | 0.02167 | 0.10155 | 3  | 29.9 | -0.4534 | 0.35199 | 0.9973 | 0.65969 | 0.182  | 0.2633 | 1  |
| 348 | P17174 | GOT1     | Aspartate amin     | sp P17174 AATC_HUMAN  | 6  | 6  | 20.1 | -0.010664 | 0.9595  | 0.999  | -0.2172 | 0.9595  | 0.99899 | 9  | 31.2 | NA      | NA      | NA     | NA      | NA     | NA     | NA |
| 349 | P17302 | GJA1     | Gap junction alp   | sp P17302 CXA1_HUMAN  | 4  | 4  | 16.5 | -0.568561 | 0.08082 | 0.9984 | 0.1792  | 0.08082 | 0.99836 | NA | NA   | NA      | NA      | NA     | NA      | NA     | NA     | NA |
| 350 | P17480 | UBTF     | Nucleolar trans    | sp P17480 UBF1_HUMAN  | 7  | 7  | 9.3  | 0.3325207 | 0.18882 | 0.9991 | 0.6964  | 0.0208  | 0.1003  | 10 | 14   | 0.14898 | 0.54684 | 0.9973 | -0.2349 | 0.3463 | 0.4369 | 5  |
| 351 | P17812 | CTPS1    | CTP synthase 1     | sp P17812 PYRG1_HUMAN | 6  | 6  | 11.7 | 0.1839976 | 0.52863 | 0.9991 | -0.7709 | 0.05108 | 0.17666 | 11 | 22.5 | -0.1304 | 0.6167  | 0.9973 | 0.22688 | 0.3882 | 0.4829 | NA |
| 352 | P17844 | DDX5     | Probable ATP-de    | sp P17844 DDX5_HUMAN  | 18 | 18 | 26.1 | -0.059485 | 0.69164 | 0.9991 | 0.0905  | 0.54761 | 0.70721 | 24 | 40.2 | 0.07854 | 0.60117 | 0.9973 | 0.26236 | 0.0935 | 0.1511 | NA |
| 353 | P17858 | PFKL     | ATP-dependent      | sp P17858 PFKAL_HUMAN | 1  | 1  | 1.2  | NA        | NA      | NA     | NA      | NA      | NA      | 4  | 6.7  | -0.1828 | NA      | NA     | NA      | NA     | NA     | NA |
| 354 | P17980 | PSMC3    | 26S proteasome     | sp P17980 PRS6A_HUMAN | 12 | 12 | 37.4 | -0.17005  | 0.36412 | 0.9991 | -0.2781 | 0.14588 | 0.31631 | 15 | 46.2 | 0.04221 | 0.81961 | 0.9973 | -0.2075 | 0.2712 | 0.3554 | NA |
| 355 | P17987 | TCP1     | T-complex prote    | sp P17987 TCPA_HUMAN  | 19 | 19 | 43.3 | -0.182054 | 0.31355 | 0.9991 | -0.5256 | 0.00828 | 0.05941 | 21 | 52.5 | -0.1261 | 0.48153 | 0.9973 | -0.7181 | 0.0008 | 0.0026 | 3  |
| 356 | P18031 | PTPN1    | Tyrosine-protein   | sp P18031 PTN1_HUMAN  | 2  | 2  | 5.1  | -0.161405 | 0.52208 | 0.9984 | -0.1471 | 0.52208 | 0.99836 | 7  | 21.4 | NA      | NA      | NA     | 0.22592 | NA     | NA     | NA |
| 357 | P18077 | RPL35A   | 60S ribosomal p    | sp P18077 RL35A_HUMAN | 5  | 5  | 39.1 | -0.354149 | 0.32412 | 0.9991 | -0.4191 | 0.24609 | 0.44396 | 6  | 39.1 | 0.22751 | 0.52275 | 0.9973 | -0.7605 | 0.0439 | 0.0774 | 4  |
| 358 | P18085 | ARF4     | ADP-ribosylation   | sp P18085 ARF4_HUMAN  | 4  | 4  | 31.7 | 0.3106449 | 0.24395 | 0.9984 | -0.2695 | 0.24395 | 0.99836 | 5  | 42.8 | NA      | NA      | NA     | NA      | NA     | NA     | NA |
| 359 | P18124 | RPL7     | 60S ribosomal p    | sp P18124 RL7_HUMAN   | 60 | 12 | 50.8 | -0.124321 | 0.68834 | 0.9991 | 0.2454  | 0.43184 | 0.6164  | 8  | 38.7 | -0.2758 | 0.37817 | 0.9973 | -1.7585 | #####  | 0.0002 | 4  |
| 360 | P18206 | VCL      | Vinculin           | sp P18206 VINC_HUMAN  | 43 | 43 | 46.1 | 0.0761284 | 0.68514 | 0.9991 | -0.5394 | 0.00975 | 0.06319 | 32 | 35.4 | 0.03563 | 0.84918 | 0.9973 | -0.8331 | 0.0003 | 0.0013 | 4  |
| 361 | P18583 | SON      | Protein SON        | sp P18583 SON_HUMAN   | 14 | 14 | 8.5  | -0.320601 | 0.21335 | 0.9984 | 0.002   | 0.21335 | 0.99836 | 12 | 7    | NA      | NA      | NA     | NA      | NA     | NA     | NA |
| 362 | P18621 | RPL17    | 60S ribosomal p    | sp P18621 RL17_HUMAN  | 6  | 7  | 42.9 | 0.3957694 | 0.22781 | 0.9991 | 0.6532  | 0.05482 | 0.18165 | 8  | 43.5 | 0.10115 | 0.75283 | 0.9973 | -0.0407 | 0.8989 | 0.9131 | NA |
| 363 | P18669 | PGAM1    | Phosphoglycerat    | sp P18669 PGAM1_HUMA  | 10 | 10 | 58.7 | 0.1802503 | 0.46219 | 0.9991 | -0.6167 | 0.02005 | 0.09873 | 16 | 76   | 0.11872 | 0.62656 | 0.9973 | -0.434  | 0.0882 | 0.1435 | 3  |
| 364 | P18858 | LIG1     | DNA ligase 1       | sp P18858 DNL1_HUMAN  | 9  | 9  | 13.6 | 0.2761236 | 0.1372  | 0.9984 | 0.0318  | 0.1372  | 0.99836 | 3  | 4.8  | -0.2503 | NA      | NA     | NA      | NA     | NA     | NA |
| 365 | P18859 | ATP5PF   | ATP synthase-co    | sp P18859 ATP5J_HUMAN | 3  | 3  | 30.6 | -0.28669  | 0.39732 | 0.9984 | 0.2026  | 0.39732 | 0.99836 | 5  | 51.9 | NA      | NA      | NA     | NA      | NA     | NA     | NA |
| 366 | P19174 | PLCG1    | 1-phosphatidylin   | sp P19174 PLCG1_HUMAN | 2  | 2  | 3    | 0.1632684 | 0.58807 | 0.9984 | -0.1546 | 0.58807 | 0.99836 | 6  | 6.5  | NA      | NA      | NA     | NA      | NA     | NA     | NA |
| 367 | P19338 | NCL      | Nucleolin          | sp P19338 NUCL_HUMAN  | 35 | 35 | 42.7 | 0.0715936 | 0.67336 | 0.9991 | 0.2623  | 0.13498 | 0.30186 | 34 | 40.7 | 0.16659 | 0.33245 | 0.9973 | 0.23332 | 0.1805 | 0.2618 | NA |
| 368 | P19367 | HK1      | Hexokinase-1       | sp P19367 HKK1_HUMAN  | 15 | 15 | 17.1 | -0.151523 | 0.581   | 0.9991 | 0.2989  | 0.28276 | 0.48307 | 17 | 20.3 | 0.2521  | 0.36245 | 0.9973 | 0.34805 | 0.2138 | 0.2996 | NA |
| 369 | P19525 | EIF2AK2  | Interferon-induc   | sp P19525 E2AK2_HUMAN | 2  | 2  | 4    | 0.0722518 | 0.86669 | 0.9984 | 0.2659  | 0.86669 | 0.99836 | 4  | 8.2  | NA      | NA      | NA     | NA      | NA     | NA     | NA |
| 370 | P19623 | SRM      | Spermidine synt    | sp P19623 SPEE_HUMAN  | 3  | 7  | 32.8 | -0.146746 | 0.58014 | 0.9991 | -0.5507 | 0.15477 | 0.32873 | 7  | 30.8 | -0.0078 | 0.97643 | 0.9973 | -0.9252 | 0.003  | 0.0082 | 4  |
| 371 | P19784 | CSNK2A2  | Casein kinase II   | sp P19784 CSK22_HUMAN | 3  | 3  | 11.4 | -0.089389 | 0.76018 | 0.9984 | 0.3748  | 0.76018 | 0.99836 | 7  | 30.9 | 0.38055 | NA      | NA     | NA      | NA     | NA     | NA |
| 372 | P20020 | ATP2B1   | Plasma membrane    | sp P20020 AT2B1_HUMAN | 3  | 3  | 4.3  | NA        | NA      | NA     | NA      | NA      | NA      | 14 | 16.6 | 0.18055 | 0.54781 | 0.9991 | -1.9137 | 0.5478 | 0.9991 | NA |
| 373 | P20042 | EIF2S2   | Eukaryotic trans   | sp P20042 IF2B_HUMAN  | 10 | 10 | 31.2 | 0.3244592 | 0.16697 | 0.9991 | 0.4005  | 0.09278 | 0.2501  | 12 | 41.7 | 0.04951 | 0.82804 | 0.9973 | -1.1227 | 0.0001 | 0.0005 | 5  |
| 374 | P20073 | ANXA7    | Annexin A7         | sp P20073 ANXA7_HUMAN | 2  | 2  | 5.1  | NA        | NA      | NA     | NA      | NA      | NA      | 7  | 15.6 | -0.0796 | 0.81551 | 0.9991 | -0.1165 | 0.8155 | 0.9991 | NA |
| 375 | P20290 | BTF3     | Transcription fac  | sp P20290 BTF3_HUMAN  | 4  | 4  | 30.1 | -0.383707 | 0.32904 | 0.9991 | -0.2882 | 0.46044 | 0.6439  | 7  | 62.1 | 0.03852 | 0.91139 | 0.9973 | -0.8347 | 0.0266 | 0.0506 | 4  |
| 376 | P20340 | RAB6A    | Ras-related prot   | sp P20340 RAB6A_HUMAN | 5  | 5  | 28.8 | -0.319335 | 0.2995  | 0.9991 | -0.2546 | 0.40521 | 0.60515 | 5  | 28.8 | -0.3117 | 0.31088 | 0.9973 | -0.6011 | 0.0604 | 0.103  | NA |
| 377 | P20618 | PSMB1    | Proteasome sub     | sp P20618 PSB1_HUMAN  | 3  | 3  | 18.3 | 0.1250305 | NA      | NA     | NA      | NA      | NA      | 7  | 42.3 | 0.3342  | 0.60273 | 0.9991 | -0.2006 | 0.6027 | 0.9991 | NA |
| 378 | P20700 | LMNB1    | Lamin-B1           | sp P20700 LMNB1_HUMAN | 36 | 36 | 59   | -0.047077 | 0.80501 | 0.9991 | 0.5249  | 0.01271 | 0.07295 | 38 | 54.3 | 0.07188 | 0.70657 | 0.9973 | 0.07857 | 0.6809 | 0.7566 | 5  |
| 379 | P20962 | PTMS     | Parathymosin       | sp P20962 PTMS_HUMAN  | 3  | 3  | 23.5 | 0.3658066 | 0.14436 | 0.9984 | -0.0386 | 0.14436 | 0.99836 | 3  | 22.5 | NA      | NA      | NA     | NA      | NA     | NA     | NA |
| 380 | P21281 | ATP6V1B2 | V-type proton A    | sp P21281 VATB2_HUMAN | 2  | 2  | 5.1  | NA        | NA      | NA     | NA      | NA      | NA      | 11 | 27.4 | 0.43804 | 0.21351 | 0.9991 | 0.57752 | 0.2135 | 0.9991 | NA |



|     |        |           |                    |                       |    |      |           |           |         |         |         |         |    |      |         |         |        |         |        |        |    |
|-----|--------|-----------|--------------------|-----------------------|----|------|-----------|-----------|---------|---------|---------|---------|----|------|---------|---------|--------|---------|--------|--------|----|
| 381 | P21291 | CSRP1     | Cysteine and gly   | sp P21291 CSRP1_HUMAN | 2  | 13   | NA        | NA        | NA      | NA      | NA      | NA      | 4  | 29.5 | -0.1645 | NA      | NA     | NA      | NA     | NA     | NA |
| 382 | P21333 | FLNA      | Filamin-A          | sp P21333 FLNA_HUMAN  | 89 | 45.6 | 0.0557023 | 0.70869   | 0.9991  | -0.2561 | 0.09917 | 0.26138 | 84 | 46.8 | 0.12606 | 0.40198 | 0.9973 | -0.1511 | 0.3173 | 0.4046 | NA |
| 383 | P21796 | VDAC1     | Voltage-depend     | sp P21796 VDAC1_HUMA  | 12 | 49.8 | -0.162151 | 0.49791   | 0.9991  | 0.0719  | 0.76252 | 0.87339 | 15 | 68.2 | 0.17079 | 0.47565 | 0.9973 | 0.04979 | 0.8341 | 0.862  | NA |
| 384 | P21912 | SDHB      | Succinate dehyd    | sp P21912 SDHB_HUMAN  | 2  | 7.5  | NA        | NA        | NA      | NA      | NA      | NA      | 5  | 20   | 0.39686 | 0.14624 | 0.9991 | -0.6787 | 0.1462 | 0.9991 | NA |
| 385 | P21926 | CD9       | CD9 antigen        | sp P21926 CD9_HUMAN   | 2  | 7    | -0.186644 | 0.48993   | 0.9984  | 1.0051  | 0.48993 | 0.99836 | NA | NA   | NA      | NA      | NA     | NA      | NA     | NA     | NA |
| 386 | P22059 | OSBP      | Oxysterol-bindin   | sp P22059 OSBP1_HUMAN | 1  | 1.6  | NA        | NA        | NA      | NA      | NA      | NA      | 2  | 3.2  | -0.0574 | 0.86586 | 0.9991 | 0.12679 | 0.8659 | 0.9991 | NA |
| 387 | P22087 | FBL       | rRNA 2-O-methy     | sp P22087 FBRL_HUMAN  | 6  | 22.4 | -0.033355 | 0.85712   | 0.9984  | -0.1309 | 0.85712 | 0.99836 | 8  | 28.7 | 0.24182 | NA      | NA     | NA      | NA     | NA     | NA |
| 388 | P22102 | GART      | Trifunctional pur  | sp P22102 PUR2_HUMAN  | 14 | 18.3 | 0.339834  | 0.1356    | 0.9991  | -0.7371 | 0.00353 | 0.03677 | 20 | 31.2 | 0.03299 | 0.88074 | 0.9973 | 0.53961 | 0.0238 | 0.0463 | 2  |
| 389 | P22234 | PAICS     | Multifunctional    | sp P22234 PUR6_HUMAN  | 14 | 37.4 | 0.2653196 | 0.2207    | 0.9991  | -0.3054 | 0.16165 | 0.33626 | 19 | 56   | 0.26875 | 0.21505 | 0.9973 | 0.61376 | 0.0093 | 0.0207 | 2  |
| 390 | P22307 | SCP2      | Non-specific lipid | sp P22307 NLTP_HUMAN  | 2  | 3.7  | 0.263415  | 0.43855   | 0.9991  | 0.7487  | 0.06096 | 0.19558 | 7  | 13.9 | 0.19128 | 0.57196 | 0.9973 | -0.0986 | 0.77   | 0.8136 | NA |
| 391 | P22314 | UBA1      | Ubiquitin-like m   | sp P22314 UBA1_HUMAN  | 27 | 35.4 | 0.1366723 | 0.56631   | 0.9991  | -0.8572 | 0.002   | 0.02835 | 33 | 45.1 | -0.1131 | 0.6344  | 0.9973 | 0.23115 | 0.3366 | 0.4262 | 3  |
| 392 | P22392 | NME2      | Nucleoside diph    | sp P22392 NDKB_HUMAN  | 10 | 66.4 | -0.212451 | 0.55616   | 0.9991  | -1.1536 | 0.00477 | 0.04078 | 11 | 74.3 | -0.4416 | 0.22927 | 0.9973 | 1.22224 | 0.0032 | 0.0084 | 2  |
| 393 | P22626 | HNRNPA2B1 | Heterogeneous      | sp P22626 ROA2_HUMAN  | 18 | 40.2 | 0.0505452 | 0.84303   | 0.9991  | 0.1676  | 0.514   | 0.68373 | 24 | 60.1 | 0.04866 | 0.8488  | 0.9973 | 1.42401 | #####  | 0.0002 | 1  |
| 394 | P22695 | UQCRC2    | Cytochrome b-c     | sp P22695 QCR2_HUMAN  | 4  | 16.1 | -0.103463 | 0.75696   | 0.9984  | -0.0427 | 0.75696 | 0.99836 | 7  | 23.8 | NA      | NA      | NA     | NA      | NA     | NA     | NA |
| 395 | P23193 | TCEA1     | Transcription el   | sp P23193 TCEA1_HUMAN | 5  | 17.6 | -0.341828 | 0.25483   | 0.9991  | -0.2385 | 0.47156 | 0.64919 | 8  | 27.6 | 0.22421 | 0.4496  | 0.9973 | -0.148  | 0.6159 | 0.7032 | NA |
| 396 | P23229 | ITGA6     | Integrin alpha-6   | sp P23229 ITA6_HUMAN  | 5  | 6.1  | 0.3144048 | NA        | NA      | NA      | NA      | NA      | NA | NA   | NA      | NA      | NA     | NA      | NA     | NA     | NA |
| 397 | P23246 | SFPQ      | Splicing factor, p | sp P23246 SFPQ_HUMAN  | 21 | 30.1 | 0.275823  | 0.21961   | 0.9991  | 0.3922  | 0.08786 | 0.24124 | 21 | 30.1 | 0.25771 | 0.25002 | 0.9973 | 0.66569 | 0.007  | 0.0163 | 1  |
| 398 | P23284 | PPIB      | Peptidyl-prolyl c  | sp P23284 PPIB_HUMAN  | 11 | 47.2 | 0.1574964 | 0.53685   | 0.9991  | 0.2413  | 0.34787 | 0.5493  | 11 | 42.1 | 0.32281 | 0.21397 | 0.9973 | 0.30999 | 0.2319 | 0.3168 | NA |
| 399 | P23378 | GLDC      | Glycine dehydro    | sp P23378 GCSP_HUMAN  | 6  | 6.9  | -0.353072 | 0.08312   | 0.9984  | 0.3994  | 0.08312 | 0.99836 | NA | NA   | NA      | NA      | NA     | NA      | NA     | NA     | NA |
| 400 | P23381 | WARS      | Tryptophan-tRNA    | sp P23381 SYWC_HUMAN  | 5  | 13.8 | -0.248101 | NA        | NA      | NA      | NA      | NA      | 9  | 31.2 | NA      | NA      | NA     | NA      | NA     | NA     | NA |
| 401 | P23396 | RPS3      | 40S ribosomal p    | sp P23396 RS3_HUMAN   | 15 | 63   | 0.1722741 | 0.47669   | 0.9991  | -0.2443 | 0.31671 | 0.51612 | 16 | 67.9 | 0.12376 | 0.60781 | 0.9973 | -0.8269 | 0.0029 | 0.008  | 4  |
| 402 | P23434 | GCSH      | Glycine cleavage   | sp P23434 GCSH_HUMAN  | 2  | 17.3 | -0.234839 | 0.46237   | 0.9984  | 0.2798  | 0.46237 | 0.99836 | 2  | 17.3 | NA      | NA      | NA     | NA      | NA     | NA     | NA |
| 403 | P23526 | AHCY      | Adenosylhomoc      | sp P23526 SAHH_HUMAN  | 13 | 35.4 | 0.0168791 | 0.94796   | 0.9991  | -0.97   | 0.00149 | 0.02711 | 15 | 38.9 | -0.0442 | 0.8642  | 0.9973 | 2.43998 | #####  | #####  | 2  |
| 404 | Q16778 | HIST2H2BE | Histone H2B typ    | sp Q16778 H2B2E_HUMAN | 11 | 60.3 | -0.226468 | 0.499     | 0.9984  | -0.0579 | 0.499   | 0.99836 | 11 | 60.3 | NA      | NA      | NA     | NA      | NA     | NA     | NA |
| 405 | P23528 | COF1      | Cofilin-1          | sp P23528 COF1_HUMAN  | 15 | 74.7 | 0.2230755 | 0.23336   | 0.9991  | -0.6731 | 0.00175 | 0.02746 | 16 | 76.5 | 0.06418 | 0.72634 | 0.9973 | 0.99459 | #####  | 0.0002 | 2  |
| 406 | P23588 | EIF4B     | Eukaryotic trans   | sp P23588 IF4B_HUMAN  | 11 | 20.6 | -0.119681 | 0.73798   | 0.9991  | -0.4073 | 0.26352 | 0.46477 | 19 | 39.8 | -0.3491 | 0.33533 | 0.9973 | 0.61502 | 0.0991 | 0.1576 | NA |
| 407 | P23921 | RRM1      | Ribonucleoside-c   | sp P23921 RIR1_HUMAN  | 7  | 9.8  | -0.071    | 0.77766   | 0.9991  | -0.7178 | 0.02058 | 0.09992 | 11 | 21.3 | 0.16551 | 0.5579  | 0.9973 | -0.0326 | 0.8966 | 0.9121 | 3  |
| 408 | P24534 | EEF1B2    | Elongation facto   | sp P24534 EF1B_HUMAN  | 10 | 55.6 | 0.1511701 | 0.58153   | 0.9991  | -0.8028 | 0.00857 | 0.06073 | 14 | 70.7 | -0.0306 | 0.91076 | 0.9973 | 1.18405 | 0.0004 | 0.0016 | 2  |
| 409 | P24539 | ATP5PB    | ATP synthase F(    | sp P24539 AT5F1_HUMAN | 6  | 25.4 | -0.209987 | 0.36381   | 0.9984  | 0.336   | 0.36381 | 0.99836 | 5  | 21.1 | NA      | NA      | NA     | NA      | NA     | NA     | NA |
| 410 | P24666 | ACP1      | Low molecular w    | sp P24666 PPAC_HUMAN  | 4  | 27.2 | 0.0134979 | 0.96293   | 0.999   | -0.5831 | 0.96293 | 0.99899 | 5  | 43   | NA      | NA      | NA     | NA      | NA     | NA     | NA |
| 411 | P24928 | POLR2A    | DNA-directed RN    | sp P24928 RPB1_HUMAN  | 6  | 4.6  | -0.046226 | 0.84635   | 0.9991  | 0.1224  | 0.64744 | 0.78737 | 7  | 5.2  | -0.0705 | 0.76767 | 0.9973 | 0.13683 | 0.6858 | 0.7593 | NA |
| 412 | P25205 | MCM3      | DNA replication    | sp P25205 MCM3_HUMAN  | 26 | 42.9 | -0.022211 | 0.91985   | 0.9991  | 0.2101  | 0.34775 | 0.5493  | 23 | 36.1 | -0.1669 | 0.45347 | 0.9973 | 0.47026 | 0.0456 | 0.0801 | 1  |
| 413 | P25398 | RPS12     | 40S ribosomal p    | sp P25398 RS12_HUMAN  | 5  | 49.2 | -0.238356 | 0.37612   | 0.9991  | -0.912  | 0.003   | 0.0343  | 7  | 69.7 | 0.12285 | 0.6453  | 0.9973 | 0.57578 | 0.0427 | 0.0755 | 2  |
| 414 | P25685 | DNAJB1    | DnaJ homolog su    | sp P25685 DNJB1_HUMAN | 4  | 13.8 | 0.4024589 | 0.16457   | 0.9991  | 0.4583  | 0.23201 | 0.42949 | 8  | 27.6 | 0.05708 | 0.8774  | 0.9973 | 0.74789 | 0.0189 | 0.0383 | 1  |
| 415 | P25705 | ATP5F1A   | ATP synthase su    | sp P25705 ATPA_HUMAN  | 22 | 40   | -0.328265 | 0.11947   | 0.9991  | 0.1683  | 0.41179 | 0.60623 | 23 | 45.8 | -0.0304 | 0.88082 | 0.9973 | -0.7844 | 0.0012 | 0.0037 | 4  |
| 416 | P25786 | PSMA1     | Proteasome sub     | sp P25786 PSA1_HUMAN  | 9  | 33.5 | 0.1423309 | 0.6438    | 0.9991  | -0.0172 | 0.9553  | 0.96897 | 12 | 51.3 | -0.1898 | 0.53858 | 0.9973 | 0.10282 | 0.738  | 0.7927 | NA |
| 417 | P25787 | PSMA2     | Proteasome sub     | sp P25787 PSA2_HUMAN  | 3  | 17.9 | NA        | NA        | NA      | NA      | NA      | NA      | 8  | 53.4 | 0.09846 | 0.71234 | 0.9991 | -0.4619 | 0.7123 | 0.9991 | NA |
| 418 | P25788 | PSMA3     | Proteasome sub     | sp P25788 PSA3_HUMAN  | 9  | 33.3 | 0.2798898 | 0.1808    | 0.9991  | 0.2125  | 0.30397 | 0.50353 | 10 | 35.7 | -0.1168 | 0.56758 | 0.9973 | -0.5117 | 0.0209 | 0.0415 | 5  |
| 419 | P25789 | PSMA4     | Proteasome sub     | sp P25789 PSA4_HUMAN  | 7  | 25.3 | 0.3490202 | 0.12106   | 0.9991  | 0.0069  | 0.97475 | 0.98167 | 10 | 41   | -0.1606 | 0.46232 | 0.9973 | -0.35   | 0.1201 | 0.1827 | NA |
| 420 | P26038 | MSN       | Moesin             | sp P26038 MOES_HUMAN  | 25 | 47.3 | -0.00143  | 0.9962    | 0.9991  | -0.5063 | 0.10603 | 0.27536 | 23 | 36.6 | -0.0345 | 0.90874 | 0.9973 | -2.7566 | #####  | #####  | 4  |
| 421 | P26196 | DDX6      | Probable ATP-de    | sp P26196 DDX6_HUMAN  | 8  | 21.1 | 0.1900111 | 0.46691   | 0.9991  | -0.5023 | 0.09762 | 0.2602  | 10 | 27.1 | -0.3092 | 0.2431  | 0.9973 | -0.4955 | 0.0702 | 0.1186 | NA |
| 422 | P26368 | U2AF2     | Splicing factor U  | sp P26368 U2AF2_HUMAN | 7  | 16.8 | -0.020256 | 0.91769   | 0.9991  | 0.2823  | 0.31706 | 0.51612 | 12 | 32.8 | -0.0772 | 0.69443 | 0.9973 | -0.4976 | 0.0213 | 0.042  | 5  |
| 423 | P26373 | RPL13     | 60S ribosomal p    | sp P26373 RL13_HUMAN  | 6  | 7    | 28.9      | 0.6496709 | 0.21789 | 0.9991  | 1.2061  | 0.02985 | 8  | 36.5 | -0.6254 | 0.23477 | 0.9973 | 0.36701 | 0.4793 | 0.5721 | 5  |
| 424 | P26583 | HMGB2     | High mobility gr   | sp P26583 HMGB2_HUMA  | 5  | 27.3 | 0.3535729 | 0.20365   | 0.9991  | 0.1691  | 0.53525 | 0.70017 | 6  | 24.4 | -0.0019 | 0.99436 | 0.9973 | 1.05194 | 0.0011 | 0.0036 | 1  |
| 425 | P26599 | PTBP1     | Polypyrimidine t   | sp P26599 PTBP1_HUMAN | 13 | 30.7 | -0.136538 | 0.54965   | 0.9991  | 0.198   | 0.38855 | 0.59757 | 15 | 37.5 | 0.11657 | 0.60895 | 0.9973 | -0.1097 | 0.6302 | 0.7149 | NA |
| 426 | P26639 | TABP      | Threonine-tRNA     | sp P26639 SYTC_HUMAN  | 13 | 21.6 | -0.005482 | 0.98129   | 0.9991  | -0.8359 | 0.00218 | 0.02915 | 20 | 33.7 | -0.1351 | 0.56528 | 0.9973 | 1.28198 | #####  | 0.0002 | 2  |
| 427 | P26640 | VAR5      | Valine-tRNA lig    | sp P26640 SYVC_HUMAN  | 13 | 13.4 | 0.2228925 | 0.51149   | 0.9991  | -0.1093 | 0.74624 | 0.86451 | 32 | 35.1 | 0.12602 | 0.70923 | 0.9973 | 3.88109 | #####  | #####  | 1  |
| 428 | P26641 | EEF1G     | Elongation facto   | sp P26641 EF1G_HUMAN  | 14 | 27.2 | 0.0098523 | 0.96651   | 0.9991  | -0.7569 | 0.00464 | 0.04065 | 22 | 56.8 | -0.0207 | 0.9298  | 0.9973 | 0.51736 | 0.0394 | 0.0705 | 2  |

|     |        |         |                   |                       |    |      |           |           |         |         |         |         |         |      |         |         |         |         |         |        |        |    |
|-----|--------|---------|-------------------|-----------------------|----|------|-----------|-----------|---------|---------|---------|---------|---------|------|---------|---------|---------|---------|---------|--------|--------|----|
| 429 | P27348 | YWHAQ   | 14-3-3 protein t  | sp P27348 1433T_HUMAN | 13 | 48.6 | -0.06082  | 0.75538   | 0.9991  | -0.6467 | 0.00381 | 0.03699 | 17      | 62.9 | 0.13338 | 0.49692 | 0.9973  | 0.96196 | 0.0001  | 0.0005 | 2      |    |
| 430 | P27635 | RPL10   | 60S ribosomal p   | sp P27635 RL10_HUMAN  | 6  | 2    | 18.7      | NA        | NA      | NA      | NA      | NA      | 5       | 30.4 | -0.1484 | 0.6709  | 0.9991  | -0.2076 | 0.6709  | 0.9991 | NA     |    |
| 431 | P27694 | RPA1    | Replication prot  | sp P27694 RFA1_HUMAN  | 7  | 12.3 | 0.0216409 | 0.90087   | 0.9991  | -0.2052 | 0.30009 | 0.50005 | 8       | 15.3 | 0.00374 | 0.98281 | 0.9973  | -1.9648 | #####   | #####  | 4      |    |
| 432 | P27695 | APEX1   | DNA-(apurinic or  | sp P27695 APEX1_HUMAN | 8  | 37.4 | 0.498416  | 0.05188   | 0.9991  | -0.1259 | 0.60341 | 0.75321 | 12      | 57.5 | -0.0491 | 0.83887 | 0.9973  | 0.99178 | 0.0007  | 0.0024 | 2      |    |
| 433 | P27708 | CAD     | CAD protein       | sp P27708 PYR1_HUMAN  | 6  | 17   | 10.2      | 0.2296947 | 0.31023 | 0.9991  | -0.1579 | 0.48177 | 0.65688 | 36   | 21.6    | 0.08986 | 0.68734 | 0.9973  | 1.25916 | #####  | 0.0002 | 2  |
| 434 | P27797 | CALR    | Calreticulin      | sp P27797 CALR_HUMAN  | 6  | 27   | 65.5      | -0.132277 | 0.53483 | 0.9991  | 0.3654  | 0.09863 | 0.26094 | 29   | 80.6    | 0.03361 | 0.87399 | 0.9973  | -0.2675 | 0.2177 | 0.3032 | NA |
| 435 | P27816 | MAP4    | Microtubule-ass   | sp P27816 MAP4_HUMAN  | 27 | 28.6 | 0.124013  | 0.64352   | 0.9984  | 0.2283  | 0.64352 | 0.99836 | 19      | 21.1 | NA      | NA      | NA      | NA      | NA      | NA     | NA     | NA |
| 436 | P27824 | CANX    | Calnexin          | sp P27824 CALX_HUMAN  | 6  | 21   | 29.6      | 0.0661227 | 0.75726 | 0.9991  | 0.6735  | 0.00544 | 0.04481 | 16   | 31.6    | 0.23159 | 0.28689 | 0.9973  | 1.44746 | #####  | #####  | 1  |
| 437 | P28066 | PSMA5   | Proteasome sub    | sp P28066 PSA5_HUMAN  | 8  | 45.6 | 0.1053169 | 0.61362   | 0.9991  | -0.0134 | 0.95385 | 0.96897 | 9       | 53.9 | -0.1557 | 0.45751 | 0.9973  | 0.15779 | 0.4517  | 0.5449 | NA     |    |
| 438 | P28070 | PSMB4   | Proteasome sub    | sp P28070 PSB4_HUMAN  | 7  | 5    | 38.3      | -0.271071 | 0.36234 | 0.9991  | -0.2142 | 0.51676 | 0.68611 | 7    | 45.5    | -0.408  | 0.17757 | 0.9973  | -1.3842 | 0.0002 | 0.0009 | 4  |
| 439 | P28072 | PSMB6   | Proteasome sub    | sp P28072 PSB6_HUMAN  | 7  | 3    | 12.6      | 0.4385315 | 0.03875 | 0.9984  | -0.3081 | 0.03875 | 0.99836 | 3    | 12.6    | NA      | NA      | NA      | NA      | NA     | NA     | NA |
| 440 | P28074 | PSMB5   | Proteasome sub    | sp P28074 PSB5_HUMAN  | 7  | 4    | 20.9      | 0.1602595 | 0.5614  | 0.9991  | -0.2234 | 0.47039 | 0.64919 | 7    | 35.7    | -0.1512 | 0.62349 | 0.9973  | 1.79536 | #####  | #####  | 2  |
| 441 | P28331 | NDUFS1  | NADH-ubiquinon    | sp P28331 NDUS1_HUMAN | 4  | 8.4  | 0.004678  | 0.99036   | 0.999   | 0.9032  | 0.99036 | 0.99899 | 7       | 13.3 | -0.0656 | NA      | NA      | NA      | NA      | NA     | NA     | NA |
| 442 | P28340 | POLD1   | DNA polymerase    | sp P28340 DPOD1_HUMAN | 2  | 2.4  | -1.084879 | 0.0162    | 0.9984  | -0.7863 | 0.0162  | 0.99836 | 3       | 3.6  | NA      | NA      | NA      | NA      | NA      | NA     | NA     | NA |
| 443 | P28482 | MAPK1   | Mitogen-activat   | sp P28482 MKO1_HUMAN  | 3  | 10.8 | 0.6305585 | 0.03398   | 0.9984  | 0.0254  | 0.03398 | 0.99836 | 6       | 20.8 | -0.2591 | NA      | NA      | NA      | NA      | NA     | NA     | NA |
| 444 | P28838 | LAP3    | Cytosol aminope   | sp P28838 AMPL_HUMAN  | 6  | 14.6 | 0.2431241 | 0.35534   | 0.9991  | 0.1347  | 0.71371 | 0.84477 | 17      | 42.2 | 0.46816 | 0.08667 | 0.9973  | 0.83315 | 0.0054  | 0.0133 | 1      |    |
| 445 | P29144 | TPP2    | Tripeptidyl-pept  | sp P29144 TPP2_HUMAN  | 7  | 8    | 9         | 0.2557984 | 0.2632  | 0.9984  | -0.3757 | 0.2632  | 0.99836 | 14   | 15.9    | NA      | NA      | NA      | NA      | NA     | NA     | NA |
| 446 | P29218 | IMPA1   | Inositol monoph   | sp P29218 IMPA1_HUMAN | 3  | 13   | NA        | NA        | NA      | NA      | NA      | NA      | 3       | 14.8 | -0.0332 | NA      | NA      | NA      | NA      | NA     | NA     | NA |
| 447 | P29373 | CRABP2  | Cellular retinoic | sp P29373 RABP2_HUMAN | 3  | 23.2 | 0.2336716 | NA        | NA      | NA      | NA      | NA      | 8       | 59.4 | NA      | NA      | NA      | NA      | NA      | NA     | NA     | NA |
| 448 | P29401 | TKT     | Transketolase     | sp P29401 TKT_HUMAN   | 7  | 23   | 43.8      | -0.08993  | 0.64643 | 0.9991  | -0.6576 | 0.00344 | 0.03677 | 22   | 44.3    | -0.0039 | 0.98397 | 0.9973  | -0.8007 | 0.0007 | 0.0024 | 3  |
| 449 | P29692 | EEF1D   | Elongation facto  | sp P29692 EF1D_HUMAN  | 10 | 43.4 | -0.006165 | 0.98264   | 0.9991  | -0.3567 | 0.21896 | 0.4107  | 20      | 69.8 | 0.02596 | 0.92702 | 0.9973  | 1.60355 | #####   | 0.0002 | 2      |    |
| 450 | P29762 | CRABP1  | Cellular retinoic | sp P29762 RABP1_HUMAN | 8  | 65.7 | -0.078917 | 0.73071   | 0.9984  | -0.0455 | 0.73071 | 0.99836 | 8       | 59.1 | NA      | NA      | NA      | NA      | NA      | NA     | NA     | NA |
| 451 | P29966 | MARCKS  | Myristoylated a   | sp P29966 MARC5_HUMAN | 13 | 69.9 | 0.2952004 | 0.31103   | 0.9984  | 0.0467  | 0.31103 | 0.99836 | 12      | 55.4 | NA      | NA      | NA      | NA      | NA      | NA     | NA     | NA |
| 452 | P30040 | ERP29   | Endoplasmic ret   | sp P30040 ERP29_HUMAN | 8  | 36.4 | 0.0073549 | 0.98359   | 0.9991  | 0.4729  | 0.1978  | 0.38005 | 10      | 52.9 | -0.2896 | 0.42282 | 0.9973  | 1.95093 | #####   | 0.0002 | 1      |    |
| 453 | P30041 | PRDX6   | Peroxioredoxin-6  | sp P30041 PRDX6_HUMAN | 10 | 53.6 | -0.172695 | 0.53785   | 0.9991  | -0.7424 | 0.01538 | 0.08199 | 17      | 78.6 | -0.4708 | 0.10514 | 0.9973  | 3.95924 | #####   | #####  | 2      |    |
| 454 | P30044 | PRDX5   | Peroxioredoxin-5  | sp P30044 PRDX5_HUMAN | 4  | 23.8 | 0.3311664 | 0.30666   | 0.9991  | -0.4119 | 0.20745 | 0.39404 | 7       | 47.7 | 0.03328 | 0.91685 | 0.9973  | 0.55276 | 0.0969  | 0.1553 | NA     |    |
| 455 | P30048 | PRDX3   | Thioredoxin-dep   | sp P30048 PRDX3_HUMAN | 6  | 25.4 | 0.1584562 | 0.64583   | 0.9991  | 0.7804  | 0.03707 | 0.14131 | 10      | 49.2 | -0.6318 | 0.23289 | 0.9973  | 3.67403 | #####   | #####  | 1      |    |
| 456 | P30050 | RPL12   | 60S ribosomal p   | sp P30050 RL12_HUMAN  | 6  | 9    | 63.6      | 0.1040017 | 0.80468 | 0.9991  | -1.0506 | 0.02162 | 0.10155 | 8    | 58.8    | 0.27045 | 0.52247 | 0.9973  | 0.66313 | 0.1282 | 0.1938 | 2  |
| 457 | P30084 | ECHS1   | Enoyl-CoA hydra   | sp P30084 ECHM_HUMAN  | 8  | 37.9 | 0.1647428 | 0.57336   | 0.9984  | 0.4213  | 0.57336 | 0.99836 | 7       | 34.5 | NA      | NA      | NA      | NA      | NA      | NA     | NA     | NA |
| 458 | P30085 | CMPK1   | UMP-CMP kinas     | sp P30085 KCY_HUMAN   | U  | 2    | 13.8      | NA        | NA      | NA      | NA      | NA      | 9       | 47.4 | -0.0199 | 0.95306 | 0.9991  | 0.77979 | 0.9531  | 0.9991 | NA     | NA |
| 459 | P30086 | PEBP1   | Phosphatidyleth   | sp P30086 PEBP1_HUMAN | 9  | 66.8 | -0.274013 | 0.56111   | 0.9991  | -1.3675 | 0.00903 | 0.06244 | 10      | 73.8 | -0.3874 | 0.41373 | 0.9973  | 2.84314 | #####   | #####  | 2      |    |
| 460 | P30101 | PDIA3   | Protein disulfide | sp P30101 PDIA3_HUMAN | 22 | 49.5 | -0.099726 | 0.52716   | 0.9991  | 0.2075  | 0.19712 | 0.37977 | 27      | 55.6 | 0.10442 | 0.50815 | 0.9973  | 0.67792 | 0.0004  | 0.0016 | 1      |    |
| 461 | P30153 | PPP2R1A | Serine/threonin   | sp P30153 2AAA_HUMAN  | 13 | 26.8 | 0.0752601 | 0.71439   | 0.9991  | -0.5681 | 0.01236 | 0.07182 | 20      | 44   | -0.1224 | 0.55317 | 0.9973  | -0.3694 | 0.0859  | 0.1419 | 3      |    |
| 462 | P30154 | PPP2R1B | Serine/threonin   | sp P30154 2AAB_HUMAN  | 2  | 3.5  | NA        | NA        | NA      | NA      | NA      | NA      | 8       | 19.5 | 0.2284  | NA      | NA      | NA      | NA      | NA     | NA     | NA |
| 463 | P30419 | NMT1    | Glycylpeptide N   | sp P30419 NMT1_HUMAN  | 5  | 13.5 | -0.066085 | 0.8343    | 0.9991  | -0.2545 | 0.57088 | 0.72797 | 6       | 16.3 | -0.1367 | 0.66601 | 0.9973  | -1.6482 | 0.0001  | 0.0005 | 4      |    |
| 464 | P30519 | HMOX2   | Heme oxygenase    | sp P30519 HMOX2_HUMAN | 2  | 7.9  | NA        | NA        | NA      | NA      | NA      | NA      | 7       | 31   | 0.16234 | NA      | NA      | NA      | NA      | NA     | NA     | NA |
| 465 | P30520 | ADSS    | Adenylosuccinat   | sp P30520 PURA2_HUMAN | 4  | 14.9 | -0.117376 | 0.72485   | 0.9991  | -0.6945 | 0.13624 | 0.30186 | 11      | 32   | 0.08054 | 0.78693 | 0.9973  | -0.2504 | 0.4064  | 0.5011 | NA     |    |
| 466 | P30533 | LRPAP1  | Alpha-2-macrog    | sp P30533 AMRP_HUMAN  | 4  | 15.1 | -0.143374 | 0.72852   | 0.9984  | 0.3899  | 0.72852 | 0.99836 | 5       | 19   | NA      | NA      | NA      | NA      | NA      | NA     | NA     | NA |
| 467 | P30566 | ADSL    | Adenylosuccinat   | sp P30566 PUR8_HUMAN  | 6  | 13.4 | 0.1990802 | 0.68119   | 0.9984  | -0.4054 | 0.68119 | 0.99836 | 11      | 32.4 | NA      | NA      | NA      | NA      | NA      | NA     | NA     | NA |
| 468 | P30837 | ALDH1B1 | Aldehyde dehyd    | sp P30837 AL1B1_HUMAN | 3  | 8.5  | -0.148359 | 0.60909   | 0.9984  | 0.2675  | 0.60909 | 0.99836 | 3       | 8.9  | NA      | NA      | NA      | NA      | NA      | NA     | NA     | NA |
| 469 | P30876 | POLR2B  | DNA-directed RN   | sp P30876 RPB2_HUMAN  | 7  | 6    | -0.100053 | 0.70786   | 0.9991  | 0.0299  | 0.92922 | 0.9536  | 9       | 10.7 | 0.22545 | 0.35195 | 0.9973  | -0.0808 | 0.735   | 0.7919 | NA     | NA |
| 470 | P31040 | SDHA    | Succinate dehyd   | sp P31040 SDHA_HUMAN  | 1  | 1.8  | NA        | NA        | NA      | NA      | NA      | NA      | 7       | 13.7 | -0.1732 | NA      | NA      | NA      | NA      | NA     | NA     | NA |
| 471 | P31153 | MAT2A   | S-adenosylmeth    | sp P31153 METK2_HUMAN | 10 | 33.2 | 0.2092938 | 0.49692   | 0.9991  | -0.8265 | 0.0142  | 0.07895 | 11      | 33.2 | -0.0941 | 0.75871 | 0.9973  | -0.5567 | 0.0828  | 0.1374 | 3      |    |
| 472 | P31689 | DNAJA1  | DnaJ homolog su   | sp P31689 DNJA1_HUMAN | 8  | 22.4 | 0.1701934 | 0.33263   | 0.9991  | -0.1692 | 0.38748 | 0.59722 | 12      | 44.3 | -0.0464 | 0.78863 | 0.9973  | 0.42046 | 0.0256  | 0.0491 | 2      |    |
| 473 | P31930 | UQCRC1  | Cytochrome b-c    | sp P31930 QCR1_HUMAN  | 4  | 13.1 | -0.217304 | 0.38628   | 0.9991  | -0.0493 | 0.8423  | 0.91735 | 7       | 21.2 | 0.23425 | 0.29926 | 0.9973  | -0.0827 | 0.7094  | 0.7775 | NA     | NA |
| 474 | P31939 | ATIC    | Bifunctional puri | sp P31939 PUR9_HUMAN  | 17 | 45.4 | 0.0245886 | 0.90856   | 0.9991  | -0.7129 | 0.0083  | 0.05941 | 31      | 75   | -0.1989 | 0.35958 | 0.9973  | 0.75384 | 0.0026  | 0.0073 | 2      |    |
| 475 | P31942 | HNRNPH3 | Heterogeneous     | sp P31942 HNRH3_HUMAN | 7  | 27.7 | -0.033206 | 0.92125   | 0.9991  | 0.3657  | 0.28484 | 0.48465 | 8       | 35.3 | 0.4355  | 0.20611 | 0.9973  | 1.18718 | 0.0024  | 0.0067 | 1      |    |
| 476 | P31943 | HNRNPH1 | Heterogeneous     | sp P31943 HNRH1_HUMAN | 11 | 31.6 | -0.074058 | 0.69196   | 0.9991  | 0.0848  | 0.65044 | 0.78966 | 14      | 48.1 | -0.0479 | 0.79766 | 0.9973  | -0.0438 | 0.8145  | 0.848  | NA     | NA |

|     |        |          |                    |                       |    |      |           |           |         |         |         |         |    |      |         |         |        |         |        |        |    |
|-----|--------|----------|--------------------|-----------------------|----|------|-----------|-----------|---------|---------|---------|---------|----|------|---------|---------|--------|---------|--------|--------|----|
| 477 | P31946 | YWHAB    | 14-3-3 protein b   | sp P31946 1433B_HUMAN | 15 | 64.6 | 0.1047426 | 0.59558   | 0.9991  | -0.4996 | 0.01981 | 0.09821 | 16 | 65.4 | 0.08587 | 0.663   | 0.9973 | 1.33532 | #####  | #####  | 2  |
| 478 | P31948 | STIP1    | Stress-induced-p   | sp P31948 STIP1_HUMAN | 28 | 49.9 | 0.1142391 | 0.54784   | 0.9991  | -0.728  | 0.0012  | 0.02575 | 36 | 62.2 | 0.04993 | 0.79187 | 0.9973 | 0.29121 | 0.1369 | 0.2047 | 2  |
| 479 | P31949 | S100A11  | Protein S100-A1    | sp P31949 S10AB_HUMAN | 4  | 41   | -0.024136 | 0.90813   | 0.9987  | -0.6594 | 0.90813 | 0.99874 | 7  | 80   | NA      | NA      | NA     | 2.91063 | NA     | NA     | NA |
| 480 | P32119 | PRDX2    | Peroxioredoxin-2   | sp P32119 PRDX2_HUMAN | 8  | 52.5 | 0.0778716 | 0.78714   | 0.9991  | -0.6686 | 0.0312  | 0.12742 | 12 | 53.5 | 0.34147 | 0.24585 | 0.9973 | 1.84232 | #####  | #####  | 2  |
| 481 | P32969 | RPL9     | 60S ribosomal p    | sp P32969 RL9_HUMAN   | 60 | 4    | 36.5      | 0.1022963 | 0.74537 | 0.9991  | 0.2283  | 0.47149 | 8  | 57.8 | -0.0792 | 0.80137 | 0.9973 | -0.7633 | 0.0251 | 0.0486 | 4  |
| 482 | P33316 | DUT      | Deoxyuridine 5-t   | sp P33316 DUT_HUMAN   | 4  | 23.8 | 0.1217801 | 0.82134   | 0.9991  | -0.2805 | 0.64288 | 0.78451 | 9  | 46   | 0.63197 | 0.43991 | 0.9973 | 3.05261 | 0.0002 | 0.0009 | 2  |
| 483 | P33981 | TTK      | Dual specificity p | sp P33981 TTK_HUMAN   | 3  | 5.6  | 0.0950067 | NA        | NA      | NA      | NA      | NA      | NA | NA   | NA      | NA      | NA     | NA      | NA     | NA     | NA |
| 484 | P33992 | MCM5     | DNA replication    | sp P33992 MCM5_HUMAN  | 14 | 25.1 | -0.008443 | 0.98102   | 0.9991  | -0.7835 | 0.03915 | 0.1469  | 13 | 24.9 | 0.01215 | 0.97268 | 0.9973 | -0.277  | 0.4394 | 0.5316 | 3  |
| 485 | P33993 | MCM7     | DNA replication    | sp P33993 MCM7_HUMAN  | 16 | 23.4 | 0.4738892 | 0.19398   | 0.9991  | -0.0242 | 0.9458  | 0.96624 | 17 | 28.9 | 0.48699 | 0.18256 | 0.9973 | 0.90086 | 0.0201 | 0.0404 | 1  |
| 486 | P34896 | SHMT1    | Serine hydroxyn    | sp P34896 GLYC_HUMAN  | 3  | 2    | 6.6       | NA        | NA      | NA      | NA      | NA      | 5  | 16.1 | 0.25769 | NA      | NA     | NA      | NA     | NA     | NA |
| 487 | P34897 | SHMT2    | Serine hydroxyn    | sp P34897 GLYM_HUMAN  | 11 | 27.8 | 0.0643378 | 0.7882    | 0.9991  | 0.9452  | 0.00097 | 0.02286 | 17 | 43.8 | -0.2755 | 0.25899 | 0.9973 | -0.281  | 0.25   | 0.3338 | 5  |
| 488 | P34932 | HSPA4    | Heat shock 70 k    | sp P34932 HSP74_HUMAN | 38 | 55.1 | 0.0564983 | 0.72211   | 0.9991  | -0.3864 | 0.02463 | 0.11264 | 39 | 59.5 | 0.1758  | 0.27648 | 0.9973 | 0.16647 | 0.3019 | 0.3875 | 2  |
| 489 | P35221 | CTNNA1   | Catenin alpha-1    | sp P35221 CTNA1_HUMAN | 17 | 27.4 | 0.1085227 | 0.5535    | 0.9984  | 0.3895  | 0.5535  | 0.99836 | 7  | 12.3 | 0.09126 | NA      | NA     | NA      | NA     | NA     | NA |
| 490 | P35222 | CTNNB1   | Catenin beta-1     | sp P35222 CTNB1_HUMAN | 7  | 12.2 | 0.3502156 | 0.14772   | 0.9984  | 0.7471  | 0.14772 | 0.99836 | 3  | 4.5  | -0.1424 | NA      | NA     | NA      | NA     | NA     | NA |
| 491 | P35232 | PHB      | Prohibitin         | sp P35232 PHB_HUMAN   | 12 | 55.9 | 0.123977  | 0.542     | 0.9991  | 0.7715  | 0.00129 | 0.02619 | 13 | 63.2 | 0.15134 | 0.45792 | 0.9973 | 0.73777 | 0.0019 | 0.0054 | 1  |
| 492 | P35241 | RDX      | Radixin            | sp P35241 RADI_HUMAN  | 14 | 23   | -0.204473 | 0.26086   | 0.9984  | -0.0647 | 0.26086 | 0.99836 | 17 | 30.4 | 0.18848 | NA      | NA     | NA      | NA     | NA     | NA |
| 493 | P35268 | RPL22    | 60S ribosomal p    | sp P35268 RL22_HUMAN  | 6  | 3    | 30.5      | 0.4634449 | 0.10156 | 0.9991  | 0.1674  | 0.5396  | 4  | 50.8 | 0.25766 | 0.34882 | 0.9973 | -0.6596 | 0.0249 | 0.0482 | 5  |
| 494 | P35579 | MYH9     | Myosin-9           | sp P35579 MYH9_HUMAN  | 71 | 42.4 | 0.0634854 | 0.67582   | 0.9991  | -0.4588 | 0.00707 | 0.05274 | 80 | 45.8 | 0.05025 | 0.74042 | 0.9973 | -1.1217 | #####  | #####  | 4  |
| 495 | P35580 | MYH10    | Myosin-10          | sp P35580 MYH10_HUMA  | 69 | 40.4 | 0.1804269 | 0.26287   | 0.9991  | -0.1008 | 0.52591 | 0.69224 | 41 | 26.5 | 0.18922 | 0.24121 | 0.9973 | -0.0864 | 0.5864 | 0.676  | NA |
| 496 | P35606 | COPB2    | Coatomer subun     | sp P35606 COPB2_HUMAN | 10 | 16.9 | 0.1431392 | 0.43875   | 0.9991  | -0.1982 | 0.28778 | 0.48813 | 15 | 23.3 | -0.0111 | 0.95159 | 0.9973 | -1.4918 | #####  | #####  | 4  |
| 497 | P35611 | ADD1     | Alpha-adducin      | sp P35611 ADDA_HUMAN  | 5  | 9.5  | 0.3400206 | 0.09585   | 0.9984  | -0.0106 | 0.09585 | 0.99836 | NA | NA   | NA      | NA      | NA     | NA      | NA     | NA     | NA |
| 498 | P35612 | ADD2     | Beta-adducin       | sp P35612 ADDB_HUMAN  | 2  | 3.7  | 0.6489368 | 0.33906   | 0.9984  | -0.203  | 0.33906 | 0.99836 | NA | NA   | NA      | NA      | NA     | NA      | NA     | NA     | NA |
| 499 | P35613 | BSG      | Basigin            | sp P35613 BASI_HUMAN  | 7  | 21.8 | -0.078333 | 0.8105    | 0.9984  | 0.6329  | 0.8105  | 0.99836 | 4  | 14.5 | NA      | NA      | NA     | NA      | NA     | NA     | NA |
| 500 | P35637 | FUS      | RNA-binding pro    | sp P35637 FUS_HUMAN   | 4  | 8.9  | 0.039121  | 0.92318   | 0.9991  | 0.1157  | 0.77582 | 0.8815  | 7  | 17.7 | 0.22301 | 0.58423 | 0.9973 | 1.21843 | 0.0075 | 0.0171 | 1  |
| 501 | P35658 | NUP214   | Nuclear pore cor   | sp P35658 NU214_HUMAN | 5  | 2.8  | -0.04766  | 0.90744   | 0.9987  | 0.6432  | 0.90744 | 0.99874 | 3  | 2.2  | NA      | NA      | NA     | NA      | NA     | NA     | NA |
| 502 | P35659 | DEK      | Protein DEK        | sp P35659 DEK_HUMAN   | 6  | 18.1 | 0.1763908 | 0.62409   | 0.9991  | 0.4192  | 0.25217 | 0.44979 | 7  | 20   | -0.3413 | 0.34794 | 0.9973 | 1.42789 | 0.0009 | 0.003  | 1  |
| 503 | P35998 | PSMC2    | 26S proteasome     | sp P35998 PRS7_HUMAN  | 15 | 43.6 | 0.1384189 | 0.53095   | 0.9991  | 0.1798  | 0.4176  | 0.61048 | 18 | 53.1 | 0.17588 | 0.42768 | 0.9973 | -0.2584 | 0.2491 | 0.3333 | NA |
| 504 | P36405 | ARL3     | ADP-ribosylation   | sp P36405 ARL3_HUMAN  | 4  | 2    | 16.5      | 0.8346962 | NA      | NA      | NA      | NA      | 5  | 37.9 | NA      | NA      | NA     | -1.335  | NA     | NA     | NA |
| 505 | P36542 | ATP5F1C  | ATP synthase su    | sp P36542 ATPG_HUMAN  | 7  | 23.2 | 0.1510699 | 0.51923   | 0.9984  | 0.7145  | 0.51923 | 0.99836 | 10 | 35.6 | -0.2557 | NA      | NA     | NA      | NA     | NA     | NA |
| 506 | Q96A05 | ATP6V1E2 | V-type proton A    | sp Q96A05 VATE2_HUMA  | 2  | 9.7  | NA        | NA        | NA      | NA      | NA      | NA      | 5  | 23   | -0.3579 | 0.23738 | 0.9991 | 0.66514 | 0.2374 | 0.9991 | NA |
| 507 | P36578 | RPL4     | 60S ribosomal p    | sp P36578 RL4_HUMAN   | 60 | 6    | 12.4      | 0.4631671 | 0.37292 | 0.9991  | 0.3509  | 0.49743 | 13 | 35.1 | -0.6367 | 0.22561 | 0.9973 | 1.44806 | 0.0111 | 0.0241 | 1  |
| 508 | P36776 | LONP1    | Lon protease ho    | sp P36776 LONM_HUMAN  | 7  | 8.7  | -0.150243 | 0.4859    | 0.9991  | 0.1829  | 0.39813 | 0.60515 | 14 | 20.1 | -0.0118 | 0.96073 | 0.9973 | 0.0744  | 0.756  | 0.8049 | NA |
| 509 | P36871 | PGM1     | Phosphoglucomu     | sp P36871 PGM1_HUMAN  | 5  | 11.4 | -0.10419  | 0.66767   | 0.9984  | -0.5727 | 0.66767 | 0.99836 | 11 | 25.3 | 0.15549 | NA      | NA     | NA      | NA     | NA     | NA |
| 510 | P36873 | PPP1CC   | Serine/threonin    | sp P36873 PP1G_HUMAN  | 4  | 15.5 | -0.07845  | 0.83513   | 0.9984  | -0.1839 | 0.83513 | 0.99836 | 12 | 41.2 | NA      | NA      | NA     | NA      | NA     | NA     | NA |
| 511 | P36957 | DLST     | Dihydrolipoyllys   | sp P36957 ODO2_HUMAN  | 8  | 19.2 | -0.300144 | 0.22925   | 0.9991  | 0.153   | 0.5328  | 0.69826 | 6  | 16.6 | 0.02428 | 0.92899 | 0.9973 | -0.1062 | 0.6641 | 0.7426 | NA |
| 512 | P37108 | SRP14    | Signal recogniti   | sp P37108 SRP14_HUMAN | 5  | 32.4 | 0.0620033 | 0.78133   | 0.9984  | 0.2763  | 0.78133 | 0.99836 | 5  | 33.1 | NA      | NA      | NA     | NA      | NA     | NA     | NA |
| 513 | P37198 | NUP62    | Nuclear pore gly   | sp P37198 NUP62_HUMAN | 3  | 7.9  | -0.073598 | 0.72231   | 0.9984  | 0.5436  | 0.72231 | 0.99836 | 6  | 17   | -0.1282 | NA      | NA     | NA      | NA     | NA     | NA |
| 514 | P37268 | FDFT1    | Squalene syntha    | sp P37268 FDFT_HUMAN  | 7  | 22.5 | -0.308129 | 0.29907   | 0.9984  | 0.0572  | 0.29907 | 0.99836 | 3  | 10.1 | NA      | NA      | NA     | NA      | NA     | NA     | NA |
| 515 | P37802 | TAGLN2   | Transgelin-2       | sp P37802 TAGL2_HUMAN | 1  | 5.5  | NA        | NA        | NA      | NA      | NA      | NA      | 13 | 78.4 | -0.2071 | 0.45015 | 0.9991 | -0.3846 | 0.4501 | 0.9991 | NA |
| 516 | P37837 | TALDO1   | Transaldolase      | sp P37837 TALDO_HUMAN | 9  | 26.7 | -0.157189 | 0.56      | 0.9991  | -0.6689 | 0.02194 | 0.10166 | 12 | 35   | -0.0389 | 0.88462 | 0.9973 | 1.91835 | #####  | #####  | 2  |
| 517 | P38117 | ETFB     | Electron transfe   | sp P38117 ETFB_HUMAN  | 6  | 25.5 | 0.1970262 | 0.56133   | 0.9984  | 1.1393  | 0.56133 | 0.99836 | 9  | 38   | NA      | NA      | NA     | NA      | NA     | NA     | NA |
| 518 | P38159 | RBMX     | RNA-binding mo     | sp P38159 RBMX_HUMAN  | 12 | 31.7 | 0.3731403 | 0.08292   | 0.9991  | 0.7748  | 0.00141 | 0.02711 | 9  | 22.8 | -0.3308 | 0.12066 | 0.9973 | 1.33385 | #####  | #####  | 1  |
| 519 | P38606 | ATP6V1A  | V-type proton A    | sp P38606 VATA_HUMAN  | 2  | 4.4  | NA        | NA        | NA      | NA      | NA      | NA      | 12 | 28   | 0.25989 | 0.65579 | 0.9991 | 2.9545  | 0.6558 | 0.9991 | NA |
| 520 | P38646 | HSPA9    | Stress-70 protei   | sp P38646 GRP75_HUMAN | 35 | 56.7 | -0.133774 | 0.47259   | 0.9991  | 0.3419  | 0.07813 | 0.22519 | 43 | 65.4 | 0.00705 | 0.96955 | 0.9973 | 0.20378 | 0.2789 | 0.3641 | NA |
| 521 | P38919 | EIF4A3   | Eukaryotic initia  | sp P38919 IF4A3_HUMAN | 10 | 22.6 | 0.0708638 | 0.74817   | 0.9991  | 0.5056  | 0.03294 | 0.12975 | 12 | 35   | 0.05401 | 0.80655 | 0.9973 | -0.4019 | 0.0822 | 0.1368 | 5  |
| 522 | P39019 | RPS19    | 40S ribosomal p    | sp P39019 RS19_HUMAN  | 4  | 8    | 49.7      | -0.270232 | 0.43628 | 0.9991  | -0.2379 | 0.58573 | 10 | 55.2 | 0.02282 | 0.94072 | 0.9973 | 1.23647 | 0.0012 | 0.0037 | 2  |
| 523 | P39023 | RPL3     | 60S ribosomal p    | sp P39023 RL3_HUMAN   | 60 | 13   | 38.7      | -0.222155 | 0.41802 | 0.9991  | 0.0541  | 0.84222 | 15 | 39.5 | -0.3088 | 0.26469 | 0.9973 | -0.7639 | 0.0112 | 0.0244 | 4  |
| 524 | P39656 | DDOST    | Dolichyl-diphosp   | sp P39656 OST48_HUMAN | 4  | 12.7 | NA        | NA        | NA      | NA      | NA      | NA      | 6  | 16.4 | -0.0244 | 0.89679 | 0.9991 | -0.1892 | 0.8968 | 0.9991 | NA |

|     |        |          |                        |                    |    |      |           |           |         |         |         |         |         |      |         |         |         |         |         |        |        |    |
|-----|--------|----------|------------------------|--------------------|----|------|-----------|-----------|---------|---------|---------|---------|---------|------|---------|---------|---------|---------|---------|--------|--------|----|
| 525 | P39687 | ANP32A   | Acidic leucine-rich sp | P39687 AN32A_HUMAN | 7  | 24.5 | 0.0329531 | 0.83915   | 0.9984  | -0.4738 | 0.83915 | 0.99836 | 10      | 48.2 | NA      | NA      | NA      | NA      | NA      | NA     | NA     |    |
| 526 | P39748 | FEN1     | Flap endonuclease sp   | P39748 FEN1_HUMAN  | 5  | 18.7 | 0.4393224 | 0.21094   | 0.9991  | 0.1333  | 0.69756 | 0.83261 | 11      | 39.5 | 0.91877 | 0.02714 | 0.9973  | 1.05707 | 0.0066  | 0.0154 | 1      |    |
| 527 | P40121 | CAPG     | Macrophage-cap sp      | P40121 CAPG_HUMAN  | 2  | 6.9  | -0.050528 | 0.89362   | 0.9984  | -0.325  | 0.89362 | 0.99836 | 3       | 11.5 | 0.15976 | NA      | NA      | NA      | NA      | NA     | NA     |    |
| 528 | P40222 | TXLNA    | Alpha-taxilin sp       | P40222 TXLNA_HUMAN | 5  | 8.6  | 0.0523124 | 0.86644   | 0.9991  | 0.0506  | 0.87085 | 0.92292 | 10      | 19   | 0.44986 | 0.16074 | 0.9973  | 1.08926 | 0.0025  | 0.0071 | 1      |    |
| 529 | P40227 | CCT6A    | T-complex prote sp     | P40227 TCPZ_HUMAN  | 16 | 40.9 | -0.036769 | 0.8455    | 0.9991  | -0.6104 | 0.00454 | 0.04022 | 20      | 49.2 | 0.0044  | 0.9814  | 0.9973  | -0.565  | 0.0076  | 0.0173 | 3      |    |
| 530 | P40429 | RPL13A   | 60S ribosomal p sp     | P40429 RL13A_HUMAN | 4  | 20.7 | 0.1120594 | 0.79      | 0.9991  | 0.4367  | 0.30676 | 0.50462 | 6       | 30   | 0.29026 | 0.49302 | 0.9973  | -0.1563 | 0.7106  | 0.7775 | NA     |    |
| 531 | P40616 | ARL1     | ADP-ribosylator sp     | P40616 ARL1_HUMAN  | 2  | 13.8 | -0.498793 | 0.14865   | 0.9991  | 0.0529  | 0.89594 | 0.93506 | 3       | 22.7 | -0.193  | 0.41515 | 0.9973  | -0.5283 | 0.0391  | 0.0705 | 4      |    |
| 532 | P40763 | STAT3    | Signal transduce sp    | P40763 STAT3_HUMAN | 3  | 4.8  | 0.5318916 | NA        | NA      | NA      | NA      | NA      | 2       | 3.6  | -0.5436 | NA      | NA      | NA      | NA      | NA     | NA     |    |
| 533 | P40925 | MDH1     | Malate dehydro sp      | P40925 MDHC_HUMAN  | 11 | 34.7 | 0.0556784 | 0.7793    | 0.9991  | -0.7607 | 0.00125 | 0.02602 | 11      | 33.8 | 0.03721 | 0.85133 | 0.9973  | 0.18771 | 0.3508  | 0.4418 | 3      |    |
| 534 | P40926 | MDH2     | Malate dehydro sp      | P40926 MDHM_HUMAN  | 16 | 55.3 | -0.068681 | 0.78188   | 0.9991  | 0.4649  | 0.07447 | 0.22092 | 17      | 63.6 | 0.35389 | 0.16589 | 0.9973  | 1.90745 | #####   | #####  | 1      |    |
| 535 | P40939 | HADHA    | Trifunctional enz sp   | P40939 ECHA_HUMAN  | 8  | 12.2 | 0.0827614 | 0.8182    | 0.9991  | 0.4358  | 0.23675 | 0.43447 | 21      | 41.5 | -0.0752 | 0.85177 | 0.9973  | 4.62546 | #####   | #####  | 1      |    |
| 536 | P41091 | EIF2S3   | Eukaryotic trans sp    | P41091 IF2G_HUMAN  | 8  | 23.5 | -0.411396 | 0.15124   | 0.9991  | -0.9594 | 0.00645 | 0.04968 | 16      | 48.1 | -0.0096 | 0.97243 | 0.9973  | 1.26986 | 0.0003  | 0.0011 | 2      |    |
| 537 | P41227 | NAA10    | N-alpha-acetyltr sp    | P41227 NAA10_HUMAN | 3  | 15.3 | -0.148443 | 0.68806   | 0.9991  | -0.2138 | 0.5983  | 0.75079 | 8       | 44.7 | -0.655  | 0.06229 | 0.9973  | 0.31665 | 0.3447  | 0.4356 | NA     |    |
| 538 | P41250 | GARS     | Glycine-tRNA lig sp    | P41250 GARS_HUMAN  | 5  | 7.4  | 0.3599101 | 0.13491   | 0.9991  | -0.2762 | 0.24455 | 0.44232 | 17      | 28.8 | -0.1109 | 0.63451 | 0.9973  | 1.4875  | #####   | #####  | 2      |    |
| 539 | P41252 | IARS     | Isoleucine-tRNA sp     | P41252 SYIC_HUMAN  | 17 | 18.2 | 0.1871652 | 0.44779   | 0.9991  | -0.2038 | 0.40925 | 0.60515 | 15      | 14.2 | -0.0923 | 0.70612 | 0.9973  | -0.1581 | 0.5202  | 0.6112 | NA     |    |
| 540 | P41567 | EIF1     | Eukaryotic trans sp    | P41567 EIF1_HUMAN  | 4  | 63.7 | 0.4293899 | NA        | NA      | NA      | NA      | NA      | 7       | 75.2 | 0.21359 | 0.49714 | 0.9991  | 0.45485 | 0.4971  | 0.9991 | NA     |    |
| 541 | P41743 | PRKCI    | Protein kinase C sp    | P41743 KPCI_HUMAN  | 2  | 4.9  | NA        | NA        | NA      | NA      | NA      | NA      | 2       | 4.9  | -0.147  | NA      | NA      | NA      | NA      | NA     | NA     |    |
| 542 | P42126 | EC1      | Enoyl-CoA delta sp     | P42126 EC1_HUMAN   | 3  | 12.6 | -0.315494 | 0.39676   | 0.9984  | 0.025   | 0.39676 | 0.99836 | 1       | 5    | NA      | NA      | NA      | NA      | NA      | NA     | NA     |    |
| 543 | P42166 | TMPO     | Lamina-associate sp    | P42166 LAP2A_HUMAN | 6  | 13.1 | -0.088173 | 0.69945   | 0.9991  | 0.2222  | 0.33724 | 0.5361  | 14      | 33.7 | -0.112  | 0.68879 | 0.9973  | 0.53802 | 0.0491  | 0.0857 | 1      |    |
| 544 | P42167 | TMPO     | Lamina-associate sp    | P42167 LAP2B_HUMAN | 5  | 15.4 | 0.0895494 | 0.87336   | 0.9991  | 0.566   | 0.32427 | 0.52252 | 12      | 40.3 | -0.0508 | 0.89214 | 0.9973  | 0.91513 | 0.029   | 0.0547 | 1      |    |
| 545 | P42224 | STAT1    | Signal transduce sp    | P42224 STAT1_HUMAN | 9  | 15.1 | 0.1740597 | 0.44674   | 0.9984  | 0.5596  | 0.44674 | 0.99836 | 5       | 8.1  | NA      | NA      | NA      | NA      | NA      | NA     | NA     |    |
| 546 | P42285 | MTREX    | Exosome RNA he sp      | P42285 MTREX_HUMAN | 8  | 10   | -0.200047 | 0.5433    | 0.9984  | -0.2598 | 0.5433  | 0.99836 | 10      | 13.5 | NA      | NA      | NA      | NA      | NA      | NA     | NA     |    |
| 547 | P42677 | RPS27    | 40S ribosomal p sp     | P42677 RS27_HUMAN  | 2  | 28.6 | 0.3692037 | 0.23274   | 0.9991  | 0.351   | 0.25558 | 0.45188 | 2       | 28.6 | 0.16467 | 0.58749 | 0.9973  | -0.0139 | 0.9672  | 0.9726 | NA     |    |
| 548 | P42704 | LRPPRC   | Leucine-rich PPR sp    | P42704 LPPRC_HUMAN | 32 | 27.2 | -0.010855 | 0.9651    | 0.9991  | 0.3726  | 0.14642 | 0.31651 | 49      | 43.6 | -0.094  | 0.70539 | 0.9973  | 4.48489 | #####   | #####  | 1      |    |
| 549 | P42765 | ACAA2    | 3-ketoacyl-CoA t sp    | P42765 THIM_HUMAN  | 7  | 26.7 | -0.015889 | 0.95524   | 0.999   | 0.7456  | 0.95524 | 0.99899 | 9       | 40.8 | NA      | NA      | NA      | NA      | NA      | NA     | NA     |    |
| 550 | P42766 | RPL35    | 60S ribosomal p sp     | P42766 RL35_HUMAN  | 2  | 14.6 | -0.423866 | 0.20057   | 0.9984  | -0.5081 | 0.20057 | 0.99836 | 2       | 14.6 | -1.1581 | NA      | NA      | NA      | NA      | NA     | NA     |    |
| 551 | P43034 | PAFAH1B1 | Platelet-activati sp   | P43034 US1_HUMAN   | 7  | 19.5 | 0.1184491 | 0.58646   | 0.9991  | -0.5544 | 0.0198  | 0.09821 | 7       | 21.7 | 0.05202 | 0.81044 | 0.9973  | -0.7011 | 0.0099  | 0.0218 | 3      |    |
| 552 | P43243 | MATR3    | Matrin-3 sp            | P43243 MATR3_HUMAN | 20 | 31.5 | 0.1357172 | 0.41372   | 0.9991  | 0.7016  | 0.00049 | 0.0144  | 19      | 34.9 | -0.2512 | 0.13964 | 0.9973  | 2.29458 | #####   | #####  | 1      |    |
| 553 | P43246 | MSH2     | DNA mismatch r sp      | P43246 MSH2_HUMAN  | 13 | 15.6 | 0.1385051 | 0.50495   | 0.9984  | -0.0332 | 0.50495 | 0.99836 | 11      | 13.2 | NA      | NA      | NA      | NA      | NA      | NA     | NA     |    |
| 554 | P43304 | GPD2     | Glycerol-3-phosp sp    | P43304 GPDH_HUMAN  | 3  | 4.5  | NA        | NA        | NA      | NA      | NA      | NA      | 10      | 16.2 | 0.1262  | 0.52077 | 0.9991  | 0.036   | 0.5208  | 0.9991 | NA     |    |
| 555 | P43307 | SSR1     | Translocon-associ sp   | P43307 SSRA_HUMAN  | 2  | 6.6  | -0.421826 | 0.27759   | 0.9991  | 0.4241  | 0.31739 | 0.51612 | 4       | 21   | -0.3293 | 0.34088 | 0.9973  | -0.3662 | 0.2914  | 0.3763 | NA     |    |
| 556 | P43487 | RANBP1   | Ran-specific GTP sp    | P43487 RANG_HUMAN  | 4  | 31.3 | -0.016266 | 0.96455   | 0.9991  | -0.5548 | 0.14293 | 0.31085 | 6       | 47.3 | 0.01156 | 0.97481 | 0.9973  | 0.81535 | 0.0377  | 0.0684 | 2      |    |
| 557 | P43490 | NAMPT    | Nicotinamide ph sp     | P43490 NAMPT_HUMAN | 8  | 21.6 | -0.254617 | 0.25376   | 0.9991  | -0.8671 | 0.01415 | 0.07895 | 9       | 24.4 | 0.44316 | 0.18972 | 0.9973  | -0.327  | 0.1939  | 0.2777 | 3      |    |
| 558 | P43686 | PSMC4    | 26S proteasome sp      | P43686 PRS6B_HUMAN | 9  | 29.9 | 0.0882632 | 0.69969   | 0.9991  | 0.0878  | 0.70104 | 0.83535 | 13      | 45.2 | 0.11331 | 0.62099 | 0.9973  | -0.4237 | 0.0774  | 0.1291 | NA     |    |
| 559 | P45880 | VDAC2    | Voltage-depend sp      | P45880 VDAC2_HUMAN | 12 | 52   | -0.048403 | 0.82737   | 0.9991  | 0.1848  | 0.40969 | 0.60515 | 13      | 56.1 | 0.19232 | 0.39136 | 0.9973  | 0.6626  | 0.0078  | 0.0175 | 1      |    |
| 560 | P45973 | CBX5     | Chromobox prot sp      | P45973 CBX5_HUMAN  | 10 | 56   | 0.1999885 | 0.56701   | 0.9991  | 0.5016  | 0.16173 | 0.33626 | 10      | 56   | 0.35958 | 0.30875 | 0.9973  | 1.73011 | 0.0001  | 0.0005 | 1      |    |
| 561 | P45974 | USP5     | Ubiquitin carbox sp    | P45974 UBP5_HUMAN  | 12 | 18.3 | 0.2095625 | 0.24016   | 0.9991  | -0.5487 | 0.00555 | 0.04524 | 20      | 30.5 | -0.0965 | 0.58207 | 0.9973  | 0.6271  | 0.0021  | 0.006  | 2      |    |
| 562 | P46013 | MKI67    | Proliferation ma sp    | P46013 KI67_HUMAN  | 13 | 7.6  | 0.2896625 | 0.28508   | 0.9984  | 0.974   | 0.28508 | 0.99836 | 17      | 8    | NA      | NA      | NA      | NA      | NA      | NA     | NA     |    |
| 563 | P46060 | RANGAP1  | Ran GTPase-acti sp     | P46060 RAGP1_HUMAN | 6  | 11.2 | -0.33586  | 0.1966    | 0.9991  | -0.1818 | 0.47597 | 0.65273 | 16      | 29.5 | 0.05659 | 0.84146 | 0.9973  | 0.6856  | 0.0259  | 0.0496 | 2      |    |
| 564 | P46087 | NOP2     | Probable 28S rR sp     | P46087 NOP2_HUMAN  | 5  | 8.5  | NA        | NA        | NA      | NA      | NA      | NA      | 11      | 16.4 | -0.2954 | 0.62526 | 0.9991  | 1.7105  | 0.6253  | 0.9991 | NA     |    |
| 565 | P46108 | CRK      | Adapter molecu sp      | P46108 CRK_HUMAN   | 2  | 8.9  | NA        | NA        | NA      | NA      | NA      | NA      | 5       | 25.7 | -0.0266 | NA      | NA      | NA      | NA      | NA     | NA     |    |
| 566 | P46109 | CRKL     | Crk-like protein sp    | P46109 CRKL_HUMAN  | 4  | 18.5 | -0.146225 | NA        | NA      | NA      | NA      | NA      | 7       | 35.3 | 0.34057 | NA      | NA      | NA      | NA      | NA     | NA     |    |
| 567 | P46776 | RPL27A   | 60S ribosomal p sp     | P46776 RL27A_HUMAN | 1  | 7.4  | NA        | NA        | NA      | NA      | NA      | NA      | 4       | 27.7 | -0.7485 | 0.11391 | 0.9991  | 2.16563 | 0.1139  | 0.9991 | NA     |    |
| 568 | P46777 | RPL5     | 60S ribosomal p sp     | P46777 RL5_HUMAN   | 11 | 36.4 | 0.0116307 | 0.96247   | 0.9991  | -0.269  | 0.28505 | 0.48465 | 12      | 40.1 | 0.02241 | 0.92776 | 0.9973  | 0.00665 | 0.9785  | 0.9827 | NA     |    |
| 569 | P46778 | RPL21    | 60S ribosomal p sp     | P46778 RL21_HUMAN  | 5  | 29.4 | -0.59914  | 0.26267   | 0.9991  | -0.4651 | 0.43183 | 0.6164  | 4       | 25   | -0.5241 | 0.32482 | 0.9973  | -1.2865 | 0.0244  | 0.0473 | 4      |    |
| 570 | P46779 | RPL28    | 60S ribosomal p sp     | P46779 RL28_HUMAN  | 4  | 28.5 | -0.554309 | 0.48138   | 0.9991  | 0.3286  | 0.6455  | 0.78636 | 4       | 28.5 | -0.4445 | 0.62302 | 0.9973  | -0.3558 | 0.5784  | 0.669  | NA     |    |
| 571 | P46781 | RPS9     | 40S ribosomal p sp     | P46781 RS9_HUMAN   | 40 | 7    | 30.4      | -0.185604 | 0.46228 | 0.9991  | 0.0504  | 0.84042 | 0.91735 | 11   | 42.3    | -0.1327 | 0.59776 | 0.9973  | 0.75112 | 0.0075 | 0.0172 | 1  |
| 572 | P46782 | RPS5     | 40S ribosomal p sp     | P46782 RS5_HUMAN   | 40 | 4    | 29.9      | -0.158909 | 0.59008 | 0.9991  | -0.0745 | 0.80002 | 0.89749 | 9    | 49      | 0.02609 | 0.92921 | 0.9973  | 0.36684 | 0.2224 | 0.3061 | NA |

|     |        |          |                   |                       |    |      |           |           |         |         |         |          |         |      |         |         |         |         |         |        |        |    |
|-----|--------|----------|-------------------|-----------------------|----|------|-----------|-----------|---------|---------|---------|----------|---------|------|---------|---------|---------|---------|---------|--------|--------|----|
| 573 | P46783 | RPS10    | 40S ribosomal p   | sp P46783 RS10_HUMAN  | 4  | 5    | 27.9      | 0.2101839 | 0.52486 | 0.9991  | 0.0553  | 0.86628  | 0.92126 | 8    | 43      | 0.47378 | 0.16197 | 0.9973  | -0.9922 | 0.0072 | 0.0167 | 4  |
| 574 | P46821 | MAP1B    | Microtubule-ass   | sp P46821 MAP1B_HUMA  | 25 | 16.6 | 0.1499327 | 0.61633   | 0.9991  | 0.5     | 0.10743 | 0.27697  | 80      | 47.7 | 0.07674 | 0.79701 | 0.9973  | 5.28338 | #####   | #####  | 1      |    |
| 575 | P46940 | IQGAP1   | Ras GTPase-activ  | sp P46940 IQGA1_HUMAN | 24 | 20.7 | -0.20777  | 0.51615   | 0.9991  | -0.2856 | 0.42628 | 0.61555  | 33      | 26.1 | 0.00692 | 0.98262 | 0.9973  | -2.7166 | #####   | #####  | 4      |    |
| 576 | P46977 | STT3A    | Dolichyl-diphosp  | sp P46977 STT3A_HUMAN | 7  | 8.7  | 0.0192125 | 0.95111   | 0.9991  | 0.1998  | 0.52626 | 0.69224  | 8       | 10.2 | 0.00904 | 0.97698 | 0.9973  | -0.9577 | 0.0067  | 0.0157 | 4      |    |
| 577 | P47755 | CAPZA2   | F-actin-capping p | sp P47755 CAZA2_HUMAN | 6  | 37.1 | 0.2449797 | 0.39733   | 0.9991  | 0.4602  | 0.16368 | 0.33736  | 9       | 53.5 | 0.35729 | 0.22304 | 0.9973  | -0.6255 | 0.0416  | 0.0739 | 5      |    |
| 578 | P47756 | CAPZB    | F-actin-capping p | sp P47756 CAPZB_HUMAN | 8  | 39.7 | 0.2657413 | 0.26312   | 0.9991  | -0.3316 | 0.214   | 0.40353  | 10      | 44.4 | -0.0752 | 0.74677 | 0.9973  | 0.84944 | 0.002   | 0.0057 | 2      |    |
| 579 | P47897 | QARS     | Glutamine-tRNA    | sp P47897 SYQ_HUMAN   | G  | 10   | 15.9      | 0.0447027 | 0.87949 | 0.9984  | 0.0611  | 0.87949  | 0.99836 | 11   | 17.8    | 0.02305 | NA      | NA      | NA      | NA     | NA     | NA |
| 580 | P48047 | ATP5PO   | ATP synthase su   | sp P48047 ATPO_HUMAN  | 5  | 23.9 | 0.0344474 | 0.91038   | 0.9987  | 0.2618  | 0.91038 | 0.99874  | 3       | 20.7 | NA      | NA      | NA      | NA      | NA      | NA     | NA     | NA |
| 581 | P48147 | PREP     | Prolyl endopept   | sp P48147 PPCE_HUMAN  | 7  | 13.8 | -0.162546 | 0.51584   | 0.9991  | -0.6522 | 0.03191 | 0.12783  | 7       | 13   | -0.233  | 0.35558 | 0.9973  | -2.0415 | #####   | 0.0002 | 4      |    |
| 582 | P48444 | ARCNI    | Coatomer subun    | sp P48444 COPD_HUMAN  | 10 | 21.5 | -0.258991 | 0.38074   | 0.9991  | -0.3454 | 0.38349 | 0.593    | 11      | 23.1 | -0.1293 | 0.62075 | 0.9973  | -0.7837 | 0.0172  | 0.0354 | 4      |    |
| 583 | P48556 | PSMD8    | 26S proteasome    | sp P48556 PSMD8_HUMA  | 4  | 14.3 | -0.155391 | 0.51408   | 0.9991  | -0.3424 | 0.20738 | 0.39404  | 6       | 18.9 | -0.1949 | 0.41506 | 0.9973  | -1.2402 | #####   | 0.0004 | 4      |    |
| 584 | P48643 | CCT5     | T-complex prote   | sp P48643 TCPE_HUMAN  | 28 | 61.4 | -0.0554   | 0.74685   | 0.9991  | -0.7754 | 0.00028 | 0.00995  | 32      | 74.3 | -0.0042 | 0.98047 | 0.9973  | -0.5377 | 0.0056  | 0.0137 | 3      |    |
| 585 | P48681 | NES      | Nestin            | sp P48681 NEST_HUMAN  | 22 | 16.6 | 0.2481393 | 0.26499   | 0.9984  | 1.0455  | 0.26499 | 0.99836  | 51      | 43.6 | NA      | NA      | NA      | NA      | NA      | NA     | NA     | NA |
| 586 | P48735 | IDH2     | Isocitrate dehyd  | sp P48735 IDHP_HUMAN  | I  | 3    | 8.2       | NA        | NA      | NA      | NA      | NA       | NA      | 12   | 27.9    | -0.0843 | 0.79192 | 0.9991  | 1.19205 | 0.7919 | 0.9991 | NA |
| 587 | P48739 | PITPNB   | Phosphatidylyno   | sp P48739 PIPNB_HUMAN | 3  | 14   | 0.2494786 | 0.39596   | 0.9991  | -0.3257 | 0.32361 | 0.52252  | 7       | 39.1 | -0.2291 | 0.4349  | 0.9973  | 2.55538 | #####   | #####  | 2      |    |
| 588 | P49006 | MARCKSL1 | MARCKS-related    | sp P49006 MRP_HUMAN   | I  | 7    | 64.1      | 0.2974109 | 0.26009 | 0.9984  | 0.0275  | 0.26009  | 0.99836 | 5    | 68.7    | NA      | NA      | NA      | NA      | NA     | NA     | NA |
| 589 | P49189 | ALDH9A1  | 4-trimethylamin   | sp P49189 AL9A1_HUMAN | 7  | 15.8 | 0.0499977 | 0.78222   | 0.9984  | -0.119  | 0.78222 | 0.99836  | 4       | 9.9  | NA      | NA      | NA      | NA      | NA      | NA     | NA     | NA |
| 590 | P49207 | RPL34    | 60S ribosomal p   | sp P49207 RL34_HUMAN  | 6  | 2    | 14.5      | 0.1523998 | 0.77512 | 0.9991  | -0.3144 | 0.6318   | 0.77639 | 3    | 20.5    | 0.51476 | 0.4375  | 0.9973  | -0.3087 | 0.6179 | 0.7043 | NA |
| 591 | P49257 | LMAN1    | Protein ERGIC-5   | sp P49257 LMAN1_HUMA  | 2  | 4.9  | -0.827643 | 0.06527   | 0.9991  | -0.406  | 0.42762 | 0.6158   | 4       | 12   | 0.59224 | 0.06259 | 0.9973  | -1.3173 | 0.0079  | 0.0178 | 4      |    |
| 592 | P49321 | NASP     | Nuclear autoant   | sp P49321 NASP_HUMAN  | 52 | 79.2 | 0.0952185 | 0.71659   | 0.9991  | -0.0012 | 0.99648 | 0.99662  | 33      | 52.3 | -0.2325 | 0.38026 | 0.9973  | 3.24391 | #####   | #####  | 1      |    |
| 593 | P49327 | FASN     | Fatty acid synth  | sp P49327 FAS_HUMAN   | F  | 60   | 31        | -0.066805 | 0.82132 | 0.9991  | -1.0819 | 0.00181  | 0.02746 | 77   | 43.5    | 0.15342 | 0.60522 | 0.9973  | 5.30125 | #####  | #####  | 2  |
| 594 | P49368 | CCT3     | T-complex prote   | sp P49368 TCPG_HUMAN  | 23 | 56.5 | -0.025459 | 0.9471    | 0.9991  | -1.3566 | 0.00238 | 0.02957  | 26      | 61.1 | 0.13805 | 0.71954 | 0.9973  | -1.0259 | 0.0151  | 0.0318 | 3      |    |
| 595 | P49411 | TUFM     | Elongation facto  | sp P49411 EFTU_HUMAN  | 18 | 46   | -0.068079 | 0.76893   | 0.9991  | 0.1255  | 0.58945 | 0.74628  | 17      | 45.1 | 0.0372  | 0.87236 | 0.9973  | -0.0327 | 0.8876  | 0.908  | NA     | NA |
| 596 | P49419 | ALDH7A1  | Alpha-aminoadi    | sp P49419 AL7A1_HUMAN | 12 | 25.6 | 0.0294766 | 0.92216   | 0.999   | 0.207   | 0.92216 | 0.99899  | 10      | 22.6 | NA      | NA      | NA      | NA      | NA      | NA     | NA     | NA |
| 597 | P49458 | SRP9     | Signal recogniti  | sp P49458 SRP09_HUMAN | 7  | 60.5 | 0.1382686 | 0.55718   | 0.9984  | 0.0844  | 0.55718 | 0.99836  | 6       | 62.8 | NA      | NA      | NA      | NA      | NA      | NA     | NA     | NA |
| 598 | P49585 | PCYT1A   | Choline-phospha   | sp P49585 PCY1A_HUMAN | 2  | 8.4  | 0.2347976 | NA        | NA      | NA      | NA      | NA       | 3       | 12.5 | NA      | NA      | NA      | NA      | NA      | NA     | NA     | NA |
| 599 | P49588 | AARS     | Alanine-tRNA li   | sp P49588 SYAC_HUMAN  | 21 | 28.7 | 0.1981962 | 0.53026   | 0.9991  | -1.2546 | 0.00088 | 0.02141  | 23      | 30.4 | -0.1382 | 0.66056 | 0.9973  | -0.9377 | 0.0077  | 0.0175 | 3      |    |
| 600 | P49589 | CARS     | Cysteine-tRNA l   | sp P49589 SYCC_HUMAN  | C  | 6    | 10.2      | 0.3672257 | 0.40468 | 0.9984  | -0.208  | 0.40468  | 0.99836 | 5    | 8       | NA      | NA      | NA      | NA      | NA     | NA     | NA |
| 601 | P49591 | SARS     | Serine-tRNA lig   | sp P49591 SYSC_HUMAN  | S  | 5    | 11.7      | 0.5959404 | 0.02085 | 0.9991  | -0.1733 | 0.51303  | 0.68372 | 13   | 28.6    | -0.161  | 0.49721 | 0.9973  | -0.2837 | 0.2388 | 0.3235 | 4  |
| 602 | P49720 | PSMB3    | Proteasome sub    | sp P49720 PSB3_HUMAN  | 3  | 2    | 13.7      | NA        | NA      | NA      | NA      | NA       | NA      | 5    | 37.6    | -0.1607 | NA      | NA      | NA      | NA     | NA     | NA |
| 603 | P49721 | PSMB2    | Proteasome sub    | sp P49721 PSB2_HUMAN  | 3  | 4    | 28.4      | 0.3205343 | 0.46855 | 0.9991  | -0.5559 | 0.24362  | 0.44232 | 5    | 33.8    | -0.319  | 0.31231 | 0.9973  | 0.02686 | 0.9309 | 0.9415 | NA |
| 604 | P49736 | MCM2     | DNA replication   | sp P49736 MCM2_HUMAN  | 15 | 23.7 | -0.001712 | 0.99441   | 0.9991  | -0.5231 | 0.04477 | 0.16277  | 17      | 23.6 | -0.0701 | 0.7745  | 0.9973  | -0.1143 | 0.6411  | 0.7215 | 3      |    |
| 605 | P49755 | TMED10   | Transmembrane     | sp P49755 TMEDA_HUMA  | 4  | 15.5 | -0.103702 | 0.7504    | 0.9991  | 0.5749  | 0.09227 | 0.24969  | 6       | 35.2 | 0.39561 | 0.28613 | 0.9973  | 0.9508  | 0.0177  | 0.0362 | 1      |    |
| 606 | P49756 | RBM25    | RNA-binding pro   | sp P49756 RBM25_HUMA  | 7  | 10   | -0.10609  | 0.74222   | 0.9984  | 0.4015  | 0.74222 | 0.99836  | 8       | 13.6 | 0.03742 | NA      | NA      | NA      | NA      | NA     | NA     | NA |
| 607 | P49790 | NUP153   | Nuclear pore cor  | sp P49790 NU153_HUMA  | 5  | 4.4  | -0.257651 | 0.59671   | 0.9984  | 0.1055  | 0.59671 | 0.99836  | 9       | 8.7  | NA      | NA      | NA      | NA      | NA      | NA     | NA     | NA |
| 608 | P49792 | RANBP2   | E3 SUMO-protei    | sp P49792 RBP2_HUMAN  | 3  | 28   | 12.4      | 0.3854077 | 0.05979 | 0.9984  | 0.4842  | 0.05979  | 0.99836 | 14   | 6.2     | NA      | NA      | NA      | NA      | NA     | NA     | NA |
| 609 | P49903 | SEPHS1   | Selenide, water   | sp P49903 SPS1_HUMAN  | S  | 5    | 19.6      | -0.047454 | 0.85708 | 0.9991  | 0.238   | 0.37221  | 0.57843 | 6    | 20.7    | 0.47679 | 0.08426 | 0.9973  | 1.12717 | 0.0005 | 0.0017 | 1  |
| 610 | P49915 | GMPS     | GMP synthase [g   | sp P49915 GUAA_HUMAN  | 15 | 28.3 | -0.100486 | 0.57826   | 0.9984  | -0.2255 | 0.57826 | 0.99836  | 16      | 32.8 | NA      | NA      | NA      | NA      | NA      | NA     | NA     | NA |
| 611 | P49916 | LIG3     | DNA ligase 3      | sp P49916 DNL3_HUMAN  | 3  | 3.4  | 0.3801107 | 0.51972   | 0.9984  | 0.5134  | 0.51972 | 0.99836  | 6       | 7.1  | NA      | NA      | NA      | NA      | NA      | NA     | NA     | NA |
| 612 | P50213 | IDH3A    | Isocitrate dehyd  | sp P50213 IDH3A_HUMAN | 1  | 3.3  | NA        | NA        | NA      | NA      | NA      | NA       | NA      | 7    | 21      | 0.09108 | 0.77134 | 0.9991  | -1.9934 | 0.7713 | 0.9991 | NA |
| 613 | P50395 | GDI2     | Rab GDP dissocia  | sp P50395 GDIB_HUMAN  | I  | 23   | 60.2      | 0.1131169 | 0.5357  | 0.9991  | -0.9322 | 7.94E-05 | 0.00704 | 32   | 78.9    | 0.16188 | 0.37842 | 0.9973  | -0.4394 | 0.0255 | 0.049  | 3  |
| 614 | P50402 | EMD      | Emerin            | sp P50402 EMD_HUMAN   | 3  | 2    | 10.6      | -0.289297 | 0.19298 | 0.9984  | 0.4488  | 0.19298  | 0.99836 | 5    | 21.7    | NA      | NA      | NA      | NA      | NA     | NA     | NA |
| 615 | P50454 | SERPINH1 | Serpin H1         | sp P50454 SERPH_HUMAN | 12 | 35.2 | 0.18404   | 0.44998   | 0.9991  | 0.2667  | 0.27818 | 0.47755  | 17      | 50.2 | -0.0576 | 0.81162 | 0.9973  | 0.07899 | 0.744   | 0.798  | NA     | NA |
| 616 | P50502 | ST13     | Hsc70-interactin  | sp P50502 F10A1_HUMAN | 7  | 25.7 | 0.1339408 | 0.70569   | 0.9991  | -1.2877 | 0.0019  | 0.0275   | 8       | 25.5 | 0.04495 | 0.89895 | 0.9973  | 2.02474 | #####   | 0.0002 | 2      |    |
| 617 | P50552 | VASP     | Vasodilator-stim  | sp P50552 VASP_HUMAN  | 5  | 17.4 | 0.8764549 | 0.01023   | 0.9984  | 0.0103  | 0.01023 | 0.99836  | 3       | 8.9  | NA      | NA      | NA      | NA      | NA      | NA     | NA     | NA |
| 618 | P50570 | DNM2     | Dynamin-2         | sp P50570 DYN2_HUMAN  | 2  | 3.7  | NA        | NA        | NA      | NA      | NA      | NA       | NA      | 3    | 4.8     | 0.01037 | NA      | NA      | NA      | NA     | NA     | NA |
| 619 | P50579 | METAP2   | Methionine ami    | sp P50579 MAP2_HUMAN  | 6  | 20.3 | 0.6314839 | 0.02428   | 0.9984  | 0.6875  | 0.02428 | 0.99836  | 6       | 19   | 0.01822 | NA      | NA      | NA      | NA      | NA     | NA     | NA |
| 620 | P50897 | PPT1     | Palmitoyl-protei  | sp P50897 PPT1_HUMAN  | I  | 2    | 8.8       | 0.5264991 | 0.18518 | 0.9984  | 1.478   | 0.18518  | 0.99836 | 3    | 11.1    | NA      | NA      | NA      | NA      | NA     | NA     | NA |

|     |        |          |                   |                       |    |      |           |           |         |         |          |         |         |      |         |         |         |         |         |        |        |   |
|-----|--------|----------|-------------------|-----------------------|----|------|-----------|-----------|---------|---------|----------|---------|---------|------|---------|---------|---------|---------|---------|--------|--------|---|
| 621 | P50914 | RPL14    | 60S ribosomal p   | sp P50914 RL14_HUMAN  | 6  | 4    | 20        | 0.5069398 | 0.09673 | 0.9991  | -0.0679  | 0.86754 | 0.92126 | 5    | 24.7    | -0.8569 | 0.02842 | 0.9973  | 0.55014 | 0.1058 | 0.1654 | 2 |
| 622 | P50990 | CCT8     | T-complex prote   | sp P50990 TCPQ_HUMAN  | 29 | 56.2 | 0.0125347 | 0.94171   | 0.9991  | -0.5429 | 0.00527  | 0.04399 | 35      | 61.1 | -0.123  | 0.47648 | 0.9973  | -0.272  | 0.1263  | 0.1917 | 3      |   |
| 623 | P50991 | CCT4     | T-complex prote   | sp P50991 TCPD_HUMAN  | 19 | 46.9 | 0.1929626 | 0.39177   | 0.9991  | -0.4704 | 0.04733  | 0.16946 | 26      | 59   | 0.13705 | 0.54072 | 0.9973  | -0.3386 | 0.1418  | 0.2099 | 3      |   |
| 624 | P50995 | ANXA11   | Annexin A11       | sp P50995 ANX11_HUMAN | 4  | 10.7 | -0.016753 | 0.93925   | 0.999   | -0.0557 | 0.93925  | 0.99899 | 3       | 5.5  | NA      | NA      | NA      | NA      | NA      | NA     | NA     |   |
| 625 | P51114 | FXR1     | Fragile X menta   | sp P51114 FXR1_HUMAN  | 11 | 26.4 | -0.31616  | 0.14756   | 0.9991  | 0.1012  | 0.63294  | 0.77639 | 14      | 30.1 | 0.39539 | 0.07505 | 0.9973  | -0.0668 | 0.7521  | 0.8039 | NA     |   |
| 626 | P51148 | RAB5C    | Ras-related prot  | sp P51148 RAB5C_HUMAN | 5  | 27.8 | -0.077431 | 0.77577   | 0.9991  | -0.0403 | 0.89214  | 0.93506 | 7       | 42.1 | 0.32437 | 0.19497 | 0.9973  | -0.0733 | 0.7632  | 0.81   | NA     |   |
| 627 | P51149 | RAB7A    | Ras-related prot  | sp P51149 RAB7A_HUMAN | 6  | 34.8 | 0.3037135 | 0.13331   | 0.9991  | 0.1643  | 0.40499  | 0.60515 | 9       | 55.6 | 0.19945 | 0.31463 | 0.9973  | 0.55874 | 0.0101  | 0.0222 | 1      |   |
| 628 | P51532 | SMARCA4  | Transcription ac  | sp P51532 SMCA4_HUMA  | 9  | 7.5  | -0.006174 | 0.9826    | 0.999   | 0.7075  | 0.9826   | 0.99899 | 7       | 5.4  | NA      | NA      | NA      | NA      | NA      | NA     | NA     |   |
| 629 | P51571 | SSR4     | Translocon-assoc  | sp P51571 SSRD_HUMAN  | 3  | 17.9 | NA        | NA        | NA      | NA      | NA       | NA      | 5       | 36.4 | 0.31947 | NA      | NA      | NA      | NA      | NA     | NA     |   |
| 630 | P51572 | BCAP31   | B-cell receptor-a | sp P51572 BAP31_HUMAN | 9  | 33.7 | -0.277452 | 0.33388   | 0.9984  | 0.6324  | 0.33388  | 0.99836 | 9       | 29.7 | 0.22463 | NA      | NA      | NA      | NA      | NA     | NA     |   |
| 631 | P51610 | HCFC1    | Host cell factor  | sp P51610 HCFC1_HUMAN | 7  | 5.2  | NA        | NA        | NA      | NA      | NA       | NA      | 13      | 9.5  | -0.4405 | NA      | NA      | NA      | NA      | NA     | NA     |   |
| 632 | P51659 | HSD17B4  | Peroxisomal mul   | sp P51659 DHB4_HUMAN  | 19 | 35.3 | -0.132366 | 0.58444   | 0.9991  | 0.202   | 0.40783  | 0.60515 | 10      | 16.7 | 0.23217 | 0.57976 | 0.9973  | 1.17283 | 0.0041  | 0.0104 | 1      |   |
| 633 | P51665 | PSMD7    | 26S proteasome    | sp P51665 PSMD7_HUMA  | 5  | 18.5 | 0.8045388 | 0.08075   | 0.9991  | 0.905   | 0.05219  | 0.17799 | 10      | 47.5 | 0.04509 | 0.91817 | 0.9973  | -0.755  | 0.0994  | 0.1577 | NA     |   |
| 634 | P51858 | HDGF     | Hepatoma-deriv    | sp P51858 HDGF_HUMAN  | 8  | 43.3 | 0.4436116 | 0.10718   | 0.9991  | 0.1187  | 0.65442  | 0.79314 | 16      | 72.5 | 0.21287 | 0.42512 | 0.9973  | 3.31189 | #####   | #####  | 1      |   |
| 635 | P51991 | HNRNPA3  | Heterogeneous     | sp P51991 ROA3_HUMAN  | 9  | 23.8 | 0.2659204 | 0.31058   | 0.9991  | 0.3765  | 0.15748  | 0.33132 | 18      | 39.7 | 0.09325 | 0.71835 | 0.9973  | -0.1142 | 0.6589  | 0.7397 | NA     |   |
| 636 | P52209 | PGD      | 6-phosphoglucos   | sp P52209 6PGD_HUMAN  | 14 | 42   | -0.090784 | 0.67505   | 0.9991  | -0.88   | 0.00074  | 0.01946 | 19      | 55.3 | 0.26884 | 0.22393 | 0.9973  | 1.14485 | #####   | 0.0003 | 2      |   |
| 637 | P52272 | HNRNPM   | Heterogeneous     | sp P52272 HNRPM_HUMA  | 37 | 54.1 | -0.230384 | 0.16212   | 0.9991  | 0.3785  | 0.02831  | 0.12313 | 30      | 48.1 | -0.1603 | 0.32303 | 0.9973  | 0.48752 | 0.0068  | 0.0158 | 1      |   |
| 638 | P52292 | KPNA2    | Importin subunit  | sp P52292 IMA1_HUMAN  | 11 | 32.9 | -0.172679 | 0.40201   | 0.9991  | -0.326  | 0.12347  | 0.28797 | 9       | 24.2 | 0.17743 | 0.38948 | 0.9973  | -0.9255 | 0.0003  | 0.0011 | 4      |   |
| 639 | P52294 | KPNA1    | Importin subunit  | sp P52294 IMA5_HUMAN  | 2  | 6.3  | -0.52781  | NA        | NA      | NA      | NA       | NA      | 5       | 14.3 | NA      | NA      | NA      | NA      | NA      | NA     | NA     |   |
| 640 | P52306 | RAP1GDS1 | Rap1 GTPase-GD    | sp P52306 GDS1_HUMAN  | 1  | 2.5  | NA        | NA        | NA      | NA      | NA       | NA      | 7       | 16.5 | -0.0208 | 0.96296 | 0.9991  | -0.339  | 0.963   | 0.9991 | NA     |   |
| 641 | P52434 | POLR2H   | DNA-directed RN   | sp P52434 RPAB3_HUMAN | 2  | 14   | NA        | NA        | NA      | NA      | NA       | NA      | 4       | 26   | 0.23451 | NA      | NA      | NA      | NA      | NA     | NA     |   |
| 642 | P52565 | ARHGDI1A | Rho GDP-dissoci   | sp P52565 GDIR1_HUMAN | 6  | 36.8 | 0.1514804 | 0.47169   | 0.9991  | -1.0593 | 9.00E-05 | 0.00709 | 10      | 51.5 | -0.0227 | 0.91336 | 0.9973  | -2.2022 | #####   | #####  | 4      |   |
| 643 | P52597 | HNRNPF   | Heterogeneous     | sp P52597 HNRPF_HUMAN | 10 | 30.4 | -0.056185 | 0.8237    | 0.9991  | 0.4188  | 0.11045  | 0.27869 | 12      | 50.4 | 0.40066 | 0.12555 | 0.9973  | 0.1085  | 0.6677  | 0.7443 | NA     |   |
| 644 | P52701 | MSH6     | DNA mismatch r    | sp P52701 MSH6_HUMAN  | 18 | 15.1 | 0.0686909 | 0.73285   | 0.9984  | -0.1553 | 0.73285  | 0.99836 | 11      | 10.3 | NA      | NA      | NA      | NA      | NA      | NA     | NA     |   |
| 645 | P52732 | KIF11    | Kinesin-like prot | sp P52732 KIF11_HUMAN | 12 | 13.3 | 0.1646705 | 0.39013   | 0.9984  | 0.1762  | 0.39013  | 0.99836 | 2       | 2.1  | NA      | NA      | NA      | NA      | NA      | NA     | NA     |   |
| 646 | P52788 | SMS      | Spermine syntha   | sp P52788 SPSY_HUMAN  | 10 | 32   | -0.026947 | 0.91614   | 0.9991  | -0.763  | 0.00926  | 0.06252 | 10      | 44.3 | 0.30714 | 0.42916 | 0.9973  | 3.44206 | #####   | #####  | 2      |   |
| 647 | P52789 | HK2      | Hexokinase-2      | sp P52789 HKK2_HUMAN  | 11 | 14.6 | 0.3621986 | 0.18204   | 0.9991  | 0.4911  | 0.11023  | 0.27869 | 19      | 24.1 | 0.0414  | 0.87515 | 0.9973  | -0.3451 | 0.2023  | 0.2892 | NA     |   |
| 648 | P52815 | MRPL12   | 39S ribosomal p   | sp P52815 RM12_HUMAN  | 5  | 35.4 | -0.001462 | 0.99765   | 0.9991  | 0.8314  | 0.14838  | 0.31977 | 8       | 52.5 | -0.1947 | 0.69583 | 0.9973  | 1.79746 | 0.0022  | 0.0061 | 1      |   |
| 649 | P52888 | THOP1    | Thimet oligopep   | sp P52888 THOP1_HUMAN | 4  | 7.4  | NA        | NA        | NA      | NA      | NA       | NA      | 10      | 14.9 | -0.1068 | 0.68721 | 0.9991  | -0.4336 | 0.6872  | 0.9991 | NA     |   |
| 650 | P52907 | CAPZA1   | F-actin-capping   | sp P52907 CAZA1_HUMAN | 7  | 42.3 | 0.376226  | 0.44821   | 0.9991  | 0.2602  | 0.59796  | 0.75079 | 12      | 70.3 | -0.2128 | 0.75962 | 0.9973  | 2.64431 | 0.0016  | 0.0048 | 1      |   |
| 651 | P52926 | HMGGA2   | High mobility gr  | sp P52926 HMGGA2_HUMA | 2  | 31.2 | -0.274618 | 0.57371   | 0.9984  | -0.2031 | 0.57371  | 0.99836 | 1       | 20.2 | NA      | NA      | NA      | NA      | NA      | NA     | NA     |   |
| 652 | P52948 | NUP98    | Nuclear pore cor  | sp P52948 NUP98_HUMAN | 6  | 4.3  | 0.1730564 | 0.6399    | 0.9991  | 0.9972  | 0.0262   | 0.11746 | 12      | 8.4  | 0.29585 | 0.42702 | 0.9973  | -0.3875 | 0.3017  | 0.3875 | 5      |   |
| 653 | P53007 | SLC25A1  | Tricarboxylate t  | sp P53007 TXTP_HUMAN  | 3  | 10   | 0.3053519 | 0.18424   | 0.9984  | 0.2937  | 0.18424  | 0.99836 | 1       | 3.5  | NA      | NA      | NA      | NA      | NA      | NA     | NA     |   |
| 654 | P53367 | ARFIP1   | Arfaptin-1        | sp P53367 ARFP1_HUMAN | 3  | 11.8 | 0.5184125 | NA        | NA      | NA      | NA       | NA      | 4       | 15.8 | NA      | NA      | NA      | NA      | NA      | NA     | NA     |   |
| 655 | P53396 | ACLY     | ATP-citrate synt  | sp P53396 ACLY_HUMAN  | 24 | 26.5 | 0.0377208 | 0.88391   | 0.9991  | -0.8937 | 0.0028   | 0.03304 | 33      | 39.3 | 0.00518 | 0.98401 | 0.9973  | 2.10607 | #####   | #####  | 2      |   |
| 656 | P53618 | COPB1    | Coatomer subun    | sp P53618 COPB_HUMAN  | 7  | 11.1 | 1.1099223 | 0.02311   | 0.9991  | 0.2699  | 0.66847  | 0.8074  | 17      | 23.5 | -0.1263 | 0.77643 | 0.9973  | -2.3174 | 0.0001  | 0.0005 | 4      |   |
| 657 | P53621 | COPA     | Coatomer subun    | sp P53621 COPA_HUMAN  | 14 | 13.3 | -0.025374 | 0.89534   | 0.9991  | -0.5299 | 0.0129   | 0.07316 | 26      | 27.5 | -0.1542 | 0.42834 | 0.9973  | -1.3868 | #####   | #####  | 4      |   |
| 658 | P53634 | CTSC     | Dipeptidyl pepti  | sp P53634 CATC_HUMAN  | 2  | 8.9  | 1.200703  | 0.0367    | 0.9984  | 1.3136  | 0.0367   | 0.99836 | 4       | 13.8 | NA      | NA      | NA      | NA      | NA      | NA     | NA     |   |
| 659 | P53680 | AP2S1    | AP-2 complex su   | sp P53680 AP2S1_HUMAN | 2  | 13.4 | NA        | NA        | NA      | NA      | NA       | NA      | 3       | 21.8 | -0.0788 | NA      | NA      | NA      | NA      | NA     | NA     |   |
| 660 | P53985 | SLC16A1  | Monocarboxylat    | sp P53985 MOT1_HUMAN  | 7  | 11.6 | -0.056716 | 0.83981   | 0.9984  | 0.9555  | 0.83981  | 0.99836 | 5       | 11.4 | NA      | NA      | NA      | NA      | NA      | NA     | NA     |   |
| 661 | P53992 | SEC24C   | Protein transpor  | sp P53992 SC24C_HUMAN | 2  | 3    | NA        | NA        | NA      | NA      | NA       | NA      | 7       | 9.2  | 0.21323 | 0.44455 | 0.9991  | 0.13649 | 0.4446  | 0.9991 | NA     |   |
| 662 | P53999 | SUB1     | Activated RNA p   | sp P53999 TCP4_HUMAN  | 4  | 27.6 | 0.9584613 | 0.06625   | 0.9984  | 0.1606  | 0.06625  | 0.99836 | 5       | 36.2 | NA      | NA      | NA      | NA      | NA      | NA     | NA     |   |
| 663 | P54105 | CLNS1A   | Methylosome su    | sp P54105 ICLN_HUMAN  | 4  | 31.6 | 0.1083739 | NA        | NA      | NA      | NA       | NA      | 7       | 59.5 | NA      | NA      | NA      | NA      | NA      | NA     | NA     |   |
| 664 | P54136 | RARS     | Arginine-tRNA l   | sp P54136 SYRC_HUMAN  | 13 | 24.8 | 0.1388507 | 0.56561   | 0.9991  | -0.4987 | 0.05096  | 0.17666 | 26      | 43.3 | 0.27562 | 0.26111 | 0.9973  | 1.53419 | #####   | #####  | 2      |   |
| 665 | P54577 | YARS     | Tyrosine-tRNA l   | sp P54577 SYYC_HUMAN  | 14 | 26.7 | 0.0971818 | 0.68442   | 0.9991  | -0.3544 | 0.19626  | 0.37977 | 20      | 43.6 | 0.08896 | 0.70974 | 0.9973  | -0.5252 | 0.0404  | 0.0721 | 3      |   |
| 666 | P54578 | USP14    | Ubiquitin carbox  | sp P54578 UBP14_HUMAN | 12 | 29.1 | 0.3143034 | 0.35277   | 0.9991  | -0.539  | 0.12003  | 0.2853  | 12      | 30.8 | -0.2987 | 0.3765  | 0.9973  | -0.4712 | 0.1705  | 0.2492 | NA     |   |
| 667 | P54652 | HSPA2    | Heat shock-relat  | sp P54652 HSP72_HUMAN | 18 | 26.6 | 0.6947119 | NA        | NA      | NA      | NA       | NA      | NA      | NA   | NA      | NA      | NA      | NA      | NA      | NA     | NA     |   |
| 668 | P54709 | ATP1B3   | Sodium/potassi    | sp P54709 AT1B3_HUMAN | 6  | 26.2 | 0.0479775 | 0.78967   | 0.9984  | 0.4847  | 0.78967  | 0.99836 | 6       | 24.7 | NA      | NA      | NA      | NA      | NA      | NA     | NA     |   |

|     |        |           |                   |                       |    |      |           |           |         |         |          |         |         |      |         |         |         |         |         |        |        |    |  |
|-----|--------|-----------|-------------------|-----------------------|----|------|-----------|-----------|---------|---------|----------|---------|---------|------|---------|---------|---------|---------|---------|--------|--------|----|--|
| 669 | P54727 | RAD23B    | UV excision repa  | sp P54727 RD23B_HUMAN | 7  | 20.5 | -0.373569 | 0.22496   | 0.9991  | -0.1597 | 0.59708  | 0.75079 | 9       | 26.9 | 0.08622 | 0.77466 | 0.9973  | 0.00072 | 0.9981  | 0.9986 | NA     |    |  |
| 670 | P54819 | AK2       | Adenylate kinas   | sp P54819 KAD2_HUMAN  | 5  | 23   | -0.173676 | 0.63817   | 0.9991  | -0.1722 | 0.70296  | 0.83624 | 13      | 69.9 | -0.1332 | 0.61039 | 0.9973  | -0.754  | 0.0116  | 0.0251 |        | 4  |  |
| 671 | P54886 | ALDH18A1  | Delta-1-pyrroli   | sp P54886 P5CS_HUMAN  | 12 | 19.2 | 0.2716137 | 0.3059    | 0.9991  | 0.5901  | 0.03518  | 0.13704 | 15      | 25.2 | -0.079  | 0.76241 | 0.9973  | 0.32722 | 0.2207  | 0.305  |        | 1  |  |
| 672 | P54920 | NAPA      | Alpha-soluble N   | sp P54920 SNAA_HUMAN  | 4  | 18.3 | 0.4493976 | 0.12635   | 0.9991  | 0.0367  | 0.9266   | 0.9536  | 7       | 31.9 | -0.3183 | 0.26915 | 0.9973  | -1.3623 | 0.0002  | 0.0009 |        | 4  |  |
| 673 | P55010 | EIF5      | Eukaryotic trans  | sp P55010 IF5_HUMAN   | 9  | 22.3 | 0.2173425 | 0.27943   | 0.9991  | -0.116  | 0.60004  | 0.75164 | 15      | 40.8 | 0.25289 | 0.21124 | 0.9973  | 1.06641 | #####   | 0.0003 |        | 2  |  |
| 674 | P55036 | PSMD4     | 26S proteasome    | sp P55036 PSMD4_HUMA  | 8  | 29.4 | -0.124555 | 0.4976    | 0.9991  | -0.0374 | 0.83764  | 0.91735 | 9       | 33.7 | 0.18883 | 0.30823 | 0.9973  | -0.2772 | 0.1417  | 0.2099 | NA     |    |  |
| 675 | P55039 | DRG2      | Developmentall    | sp P55039 DRG2_HUMAN  | 2  | 5.8  | NA        | NA        | NA      | NA      | NA       | NA      | 2       | 5.8  | -0.0415 | NA      | NA      | NA      | NA      | NA     | NA     |    |  |
| 676 | P55060 | CSE1L     | Exportin-2        | sp P55060 XPO2_HUMAN  | 18 | 23.6 | 0.1363375 | 0.43559   | 0.9991  | -0.4063 | 0.02966  | 0.12709 | 28      | 35.6 | 0.09144 | 0.59912 | 0.9973  | -0.123  | 0.4811  | 0.5723 |        | 3  |  |
| 677 | P55072 | VCP       | Transitional end  | sp P55072 TERA_HUMAN  | 37 | 59.6 | -0.078134 | 0.81682   | 0.9991  | -0.9279 | 0.01276  | 0.07295 | 42      | 66.3 | 0.07631 | 0.82101 | 0.9973  | -0.792  | 0.0294  | 0.0554 |        | 3  |  |
| 678 | P55081 | MFAP1     | Microfibrillar-as | sp P55081 MFAP1_HUMA  | 2  | 4.8  | NA        | NA        | NA      | NA      | NA       | NA      | 4       | 14.6 | 1.12096 | 0.28661 | 0.9991  | 0.97431 | 0.2866  | 0.9991 | NA     |    |  |
| 679 | P55084 | HADHB     | Trifunctional en  | sp P55084 ECHB_HUMAN  | 3  | 10.3 | NA        | NA        | NA      | NA      | NA       | NA      | 11      | 28.3 | 0.42224 | 0.21708 | 0.9991  | 0.91673 | 0.2171  | 0.9991 | NA     |    |  |
| 680 | P55145 | MANF      | Mesencephalic a   | sp P55145 MANF_HUMAN  | 2  | 6    | NA        | NA        | NA      | NA      | NA       | NA      | 7       | 41.8 | 0.18776 | 0.76164 | 0.9991  | 0.67625 | 0.7616  | 0.9991 | NA     |    |  |
| 681 | P55209 | NAP1L1    | Nucleosome asse   | sp P55209 NP1L1_HUMAN | 7  | 19.2 | 0.5696548 | 0.27838   | 0.9991  | -0.9917 | 0.06828  | 0.20962 | 11      | 39.4 | -0.1855 | 0.71968 | 0.9973  | -0.3188 | 0.539   | 0.6306 | NA     |    |  |
| 682 | P55265 | ADAR      | Double-stranded   | sp P55265 DSRAD_HUMA  | 14 | 14.9 | 0.125546  | 0.638     | 0.9984  | 0.6716  | 0.638    | 0.99836 | 15      | 16.6 | NA      | NA      | NA      | NA      | NA      | NA     | NA     |    |  |
| 683 | P55327 | TPD52     | Tumor protein D   | sp P55327 TPD52_HUMAN | 2  | 11.6 | NA        | NA        | NA      | NA      | NA       | NA      | 6       | 39.7 | -0.1279 | 0.68418 | 0.9991  | 0.02449 | 0.6842  | 0.9991 | NA     |    |  |
| 684 | P55735 | SEC13     | Protein SEC13 h   | sp P55735 SEC13_HUMAN | 3  | 18   | 0.1706012 | 0.37841   | 0.9991  | 0.1248  | 0.62753  | 0.77546 | 6       | 27.6 | 0.6791  | 0.00129 | 0.4588  | -0.0497 | 0.7713  | 0.8138 |        | 5  |  |
| 685 | P55769 | SNU13     | NHP2-like prote   | sp P55769 NH2L1_HUMAN | 5  | 39.8 | 0.2606126 | 0.32661   | 0.9991  | 0.4114  | 0.12956  | 0.29535 | 6       | 61.7 | -0.1222 | 0.64177 | 0.9973  | 0.9834  | 0.0015  | 0.0044 |        | 1  |  |
| 686 | P55786 | NPEPPS    | Puromycin-sens    | sp P55786 PSA_HUMAN   | 13 | 15.3 | -0.279507 | 0.18911   | 0.9991  | -1.2238 | 1.69E-05 | 0.00239 | 9       | 11.5 | -0.1065 | 0.60863 | 0.9973  | -0.6372 | 0.0064  | 0.0152 |        | 3  |  |
| 687 | P55795 | HNRNPH2   | Heterogeneous     | sp P55795 HNRH2_HUMA  | 8  | 25.8 | 0.0178363 | NA        | NA      | NA      | NA       | NA      | 8       | 26.3 | -0.5958 | 0.25648 | 0.9991  | -0.6995 | 0.2565  | 0.9991 | NA     |    |  |
| 688 | P55854 | SUMO3     | Small ubiquitin-r | sp P55854 SUMO3_HUMA  | 2  | 20.4 | 0.2621872 | 0.18296   | 0.9984  | -0.0534 | 0.18296  | 0.99836 | 2       | 20.4 | NA      | NA      | NA      | NA      | NA      | NA     | NA     |    |  |
| 689 | P55884 | EIF3B     | Eukaryotic trans  | sp P55884 EIF3B_HUMAN | 15 | 21.7 | 0.0439908 | 0.84393   | 0.9991  | -0.426  | 0.07022  | 0.21187 | 23      | 33.7 | -0.0972 | 0.66444 | 0.9973  | -0.5095 | 0.0338  | 0.0619 |        | 3  |  |
| 690 | P56385 | ATP5ME    | ATP synthase su   | sp P56385 ATP5I_HUMAN | 3  | 31.9 | 0.8020048 | 0.1196    | 0.9984  | 1.1286  | 0.1196   | 0.99836 | 2       | 30.4 | NA      | NA      | NA      | NA      | NA      | NA     | NA     |    |  |
| 691 | P56537 | EIF6      | Eukaryotic trans  | sp P56537 IF6_HUMAN   | 5  | 30.2 | 0.0364617 | 0.88652   | 0.9991  | 0.2682  | 0.35549  | 0.55885 | 4       | 26.9 | -0.164  | 0.60195 | 0.9973  | 0.98231 | 0.0037  | 0.0097 |        | 1  |  |
| 692 | P56545 | CTBP2     | C-terminal-bindi  | sp P56545 CTBP2_HUMAN | 4  | 16.4 | 0.0845056 | 0.60798   | 0.9984  | -0.1738 | 0.60798  | 0.99836 | 6       | 20   | NA      | NA      | NA      | NA      | NA      | NA     | NA     |    |  |
| 693 | P56747 | CLDN6     | Claudin-6         | sp P56747 CLD6_HUMAN  | 2  | 8.2  | -0.572129 | 0.19205   | 0.9984  | 0.196   | 0.19205  | 0.99836 | NA      | NA   | NA      | NA      | NA      | NA      | NA      | NA     | NA     |    |  |
| 694 | P57740 | NUP107    | Nuclear pore cor  | sp P57740 NU107_HUMAN | 5  | 6.1  | 0.1026805 | 0.71156   | 0.9991  | 0.1099  | 0.71794  | 0.84693 | 6       | 7.4  | 0.38967 | 0.17717 | 0.9973  | -0.9247 | 0.0202  | 0.0404 |        | 4  |  |
| 695 | P58546 | MTPN      | Myotrophin        | sp P58546 MTPN_HUMAN  | 3  | 28.8 | 0.7193357 | NA        | NA      | NA      | NA       | NA      | 4       | 44.1 | 0.03291 | 0.89031 | 0.9991  | 0.74665 | 0.8903  | 0.9991 | NA     |    |  |
| 696 | Q99879 | HIST1H2BM | Histone H2B typ   | sp Q99879 H2B1M_HUMA  | 11 | 60.3 | -0.091418 | 0.83714   | 0.9991  | -0.04   | 0.92832  | 0.9536  | 11      | 60.3 | 0.40245 | 0.37121 | 0.9973  | -0.3206 | 0.4743  | 0.5671 | NA     |    |  |
| 697 | P59998 | ARPC4     | Actin-related pr  | sp P59998 ARPC4_HUMAN | 4  | 22.6 | 0.0223883 | 0.91877   | 0.9991  | 0.0153  | 0.95013  | 0.96788 | 4       | 22.6 | -0.0966 | 0.66092 | 0.9973  | -1.3403 | #####   | 0.0001 |        | 4  |  |
| 698 | P60033 | CD81      | CD81 antigen      | sp P60033 CD81_HUMAN  | 1  | 8.5  | NA        | NA        | NA      | NA      | NA       | NA      | 1       | 8.5  | NA      | NA      | NA      | NA      | NA      | NA     | NA     | NA |  |
| 699 | P60059 | SEC61G    | Protein transpor  | sp P60059 SC61G_HUMAN | 3  | 42.6 | -0.357679 | 0.26388   | 0.9984  | 0.3923  | 0.26388  | 0.99836 | 2       | 36.8 | 0.07876 | NA      | NA      | NA      | NA      | NA     | NA     | NA |  |
| 700 | P60174 | TPI1      | Triosephosphate   | sp P60174 TPIS_HUMAN  | 20 | 78.3 | -0.035813 | 0.84307   | 0.9991  | -0.8146 | 0.00029  | 0.00995 | 19      | 77.6 | 0.00925 | 0.9592  | 0.9973  | 1.53615 | #####   | #####  |        | 2  |  |
| 701 | P60228 | EIF3E     | Eukaryotic trans  | sp P60228 EIF3E_HUMAN | 10 | 29   | -0.001255 | 0.99563   | 0.9991  | -0.2345 | 0.31407  | 0.51427 | 13      | 35.1 | -0.1727 | 0.45512 | 0.9973  | -0.2358 | 0.3115  | 0.398  | NA     |    |  |
| 702 | P60520 | GABARAPL2 | Gamma-aminobu     | sp P60520 GBRL2_HUMAN | 2  | 22.2 | -0.320155 | 0.3386    | 0.9984  | -0.2032 | 0.3386   | 0.99836 | 3       | 29.1 | NA      | NA      | NA      | NA      | NA      | NA     | NA     | NA |  |
| 703 | P60660 | MYL6      | Myosin light pol  | sp P60660 MYL6_HUMAN  | 10 | 64.9 | 0.2903899 | 0.24911   | 0.9991  | -0.3397 | 0.18079  | 0.35905 | 10      | 64.9 | 0.13699 | 0.58057 | 0.9973  | 0.21844 | 0.3817  | 0.4761 | NA     |    |  |
| 704 | P60842 | EIF4A1    | Eukaryotic initia | sp P60842 IF4A1_HUMAN | 20 | 51.5 | 0.0209199 | 0.91323   | 0.9991  | -0.403  | 0.04851  | 0.17027 | 24      | 63.3 | -0.0587 | 0.75998 | 0.9973  | -0.7565 | 0.001   | 0.0032 |        | 4  |  |
| 705 | P60866 | RP520     | 40S ribosomal p   | sp P60866 RS20_HUMAN  | 4  | 5    | 43.7      | -0.204923 | 0.45146 | 0.9991  | -0.4305  | 0.16668 | 0.34057 | 4    | 37      | -0.1116 | 0.67986 | 0.9973  | 0.31593 | 0.2517 | 0.3348 | NA |  |
| 706 | P60891 | PRPS1     | Ribose-phosphat   | sp P60891 PRPS1_HUMAN | 5  | 19.8 | -0.410076 | 0.5059    | 0.9984  | 0.2283  | 0.5059   | 0.99836 | 5       | 21.7 | NA      | NA      | NA      | NA      | NA      | NA     | NA     | NA |  |
| 707 | P60900 | PSMA6     | Proteasome sub    | sp P60900 PSA6_HUMAN  | 6  | 32.1 | 0.4377611 | 0.09647   | 0.9991  | 0.0365  | 0.89662  | 0.93506 | 8       | 41.1 | 0.11605 | 0.64539 | 0.9973  | -0.9003 | 0.0023  | 0.0066 |        | 4  |  |
| 708 | P60903 | S100A10   | Protein S100-A1   | sp P60903 S10AA_HUMAN | 1  | 10.3 | NA        | NA        | NA      | NA      | NA       | NA      | 2       | 19.6 | -0.1863 | NA      | NA      | NA      | NA      | NA     | NA     | NA |  |
| 709 | P60953 | CDC42     | Cell division con | sp P60953 CDC42_HUMAN | 8  | 38.7 | -0.441835 | 0.07515   | 0.9991  | -0.2853 | 0.23715  | 0.43447 | 11      | 48.7 | 0.13585 | 0.56698 | 0.9973  | -0.0381 | 0.8717  | 0.897  | NA     |    |  |
| 710 | P60981 | DSTN      | Destrin           | sp P60981 DEST_HUMAN  | 8  | 54.5 | 0.5595644 | 0.12579   | 0.9991  | -0.6462 | 0.11469  | 0.27942 | 5       | 33.3 | 0.1595  | 0.65092 | 0.9973  | -0.6897 | 0.064   | 0.1083 | NA     |    |  |
| 711 | P60983 | GMFB      | Glia maturation   | sp P60983 GMFB_HUMAN  | 5  | 39.4 | -0.097831 | 0.72865   | 0.9984  | -0.0362 | 0.72865  | 0.99836 | 5       | 27.5 | NA      | NA      | NA      | NA      | NA      | NA     | NA     | NA |  |
| 712 | P61011 | SRP54     | Signal recogniti  | sp P61011 SRP54_HUMAN | 3  | 6.2  | 0.0280609 | 0.89462   | 0.9984  | -0.0914 | 0.89462  | 0.99836 | 6       | 15.3 | -0.2765 | NA      | NA      | NA      | NA      | NA     | NA     | NA |  |
| 713 | P61019 | RAB2A     | Ras-related prot  | sp P61019 RAB2A_HUMAN | 6  | 34.4 | 0.0548909 | 0.80703   | 0.9991  | 0.1367  | 0.54506  | 0.70555 | 6       | 34.4 | 0.22065 | 0.33286 | 0.9973  | -1.1508 | #####   | 0.0004 |        | 4  |  |
| 714 | P61026 | RAB10     | Ras-related prot  | sp P61026 RAB10_HUMAN | 4  | 24.5 | 0.0660757 | 0.77466   | 0.9991  | 0.2444  | 0.29735  | 0.4984  | 6       | 33.5 | 0.08803 | 0.70317 | 0.9973  | -0.0786 | 0.7336  | 0.7917 | NA     |    |  |
| 715 | P61081 | UBE2M     | NEDD8-conjugat    | sp P61081 UBC12_HUMAN | 4  | 21.3 | 0.2975663 | NA        | NA      | NA      | NA       | NA      | 4       | 20.8 | 0.97261 | 0.00992 | 0.9991  | 0.96863 | 0.0099  | 0.9991 | NA     |    |  |
| 716 | P61088 | UBE2N     | Ubiquitin-conjug  | sp P61088 UBE2N_HUMAN | 4  | 36.8 | -0.050143 | 0.85903   | 0.9991  | -0.7906 | 0.01151  | 0.07028 | 10      | 80.9 | 0.27762 | 0.33235 | 0.9973  | 2.2958  | #####   | #####  |        | 2  |  |

|     |        |          |                   |    |        |             |    |      |           |           |         |         |         |         |         |      |         |         |         |         |         |        |        |    |
|-----|--------|----------|-------------------|----|--------|-------------|----|------|-----------|-----------|---------|---------|---------|---------|---------|------|---------|---------|---------|---------|---------|--------|--------|----|
| 717 | P61106 | RAB14    | Ras-related prot  | sp | P61106 | RAB14_HUMAN | 5  | 32.6 | -0.02424  | 0.92691   | 0.9991  | 0.506   | 0.08812 | 0.24124 | 7       | 42.8 | -0.1336 | 0.47872 | 0.9973  | -0.4437 | 0.0305  | 0.0569 | 5      |    |
| 718 | P61158 | ACTR3    | Actin-related pr  | sp | P61158 | ARP3_HUMAN  | 3  | 6.7  | 0.0635507 | 0.91959   | 0.9991  | 0.0884  | 0.88839 | 0.93452 | 11      | 36.1 | 0.07253 | 0.86285 | 0.9973  | -0.8044 | 0.0734  | 0.1236 | NA     |    |
| 719 | P61160 | ACTR2    | Actin-related pr  | sp | P61160 | ARP2_HUMAN  | 6  | 17.8 | 0.19892   | 0.49138   | 0.9991  | 0.0113  | 0.96865 | 0.97692 | 7       | 24.1 | 0.05757 | 0.84107 | 0.9973  | -1.521  | #####   | 0.0003 | 4      |    |
| 720 | P61163 | ACTR1A   | Alpha-centractin  | sp | P61163 | ACTZ_HUMAN  | 4  | 18.4 | 0.4668361 | NA        | NA      | NA      | NA      | NA      | 6       | 27.1 | -0.0707 | 0.70052 | 0.9991  | 0.06957 | 0.7005  | 0.9991 | NA     |    |
| 721 | P61201 | COPS2    | COP9 signalosom   | sp | P61201 | CSN2_HUMAN  | 6  | 14.4 | 0.0829529 | 0.78482   | 0.9991  | -0.1494 | 0.72821 | 0.85198 | 10      | 29.3 | 0.02972 | 0.92199 | 0.9973  | -0.3867 | 0.2151  | 0.3009 | NA     |    |
| 722 | P84077 | ARF1     | ADP-ribosylation  | sp | P84077 | ARF1_HUMAN  | 4  | 33.7 | 0.4305792 | 0.13536   | 0.9991  | -0.6063 | 0.04152 | 0.15175 | 7       | 54.7 | 0.06183 | 0.82433 | 0.9973  | -1.41   | #####   | 0.0004 | 4      |    |
| 723 | P61221 | ABCE1    | ATP-binding cass  | sp | P61221 | ABCE1_HUMAN | 5  | 9.3  | 0.2201624 | 0.43737   | 0.9991  | -0.1267 | 0.68718 | 0.82299 | 13      | 27.4 | -0.0994 | 0.72381 | 0.9973  | 0.30676 | 0.2836  | 0.3683 | NA     |    |
| 724 | P61224 | RAP1B    | Ras-related prot  | sp | P61224 | RAP1B_HUMAN | 3  | 19   | -0.046205 | 0.85969   | 0.9991  | -0.0657 | 0.85883 | 0.92074 | 8       | 42.9 | -0.0873 | 0.73887 | 0.9973  | -1.1712 | 0.0004  | 0.0016 | 4      |    |
| 725 | P61247 | RPS3A    | 40S ribosomal p   | sp | P61247 | RS3A_HUMAN  | 13 | 38.3 | 0.0693547 | 0.77903   | 0.9991  | -0.435  | 0.09212 | 0.24969 | 18      | 61.4 | -0.1846 | 0.4584  | 0.9973  | -0.3775 | 0.1396  | 0.2075 | NA     |    |
| 726 | P61254 | RPL26    | 60S ribosomal p   | sp | P61254 | RL26_HUMAN  | 6  | 37.2 | 0.1749386 | 0.53461   | 0.9991  | 0.5506  | 0.06279 | 0.19963 | 7       | 37.9 | 0.01738 | 0.9505  | 0.9973  | -0.8586 | 0.0066  | 0.0154 | 5      |    |
| 727 | P61289 | PSME3    | Proteasome acti   | sp | P61289 | PSME3_HUMA  | 6  | 26.8 | 0.263291  | 0.23449   | 0.9991  | 0.0718  | 0.76675 | 0.87681 | 12      | 55.9 | -0.1489 | 0.4946  | 0.9973  | 0.67693 | 0.006   | 0.0145 | 1      |    |
| 728 | P61313 | RPL15    | 60S ribosomal p   | sp | P61313 | RL15_HUMAN  | 6  | 2    | 11.3      | NA        | NA      | NA      | NA      | NA      | 7       | 33.3 | -0.2347 | 0.67213 | 0.9991  | 2.33823 | 0.6721  | 0.9991 | NA     |    |
| 729 | P61326 | MAGOH    | Protein mago na   | sp | P61326 | MGN_HUMAN   | 7  | 37   | NA        | NA        | NA      | NA      | NA      | NA      | 7       | 43.8 | 0.14221 | 0.56237 | 0.9991  | 0.1082  | 0.5624  | 0.9991 | NA     |    |
| 730 | P61353 | RPL27    | 60S ribosomal p   | sp | P61353 | RL27_HUMAN  | 6  | 5    | 26.5      | -0.180074 | 0.60178 | 0.9991  | -0.3548 | 0.30968 | 0.50825 | 6    | 32.4    | -0.3589 | 0.30429 | 0.9973  | -0.0962 | 0.7797 | 0.8214 | NA |
| 731 | P61421 | ATP6VOD1 | V-type proton A   | sp | P61421 | VAOD1_HUMA  | 2  | 6.6  | NA        | NA        | NA      | NA      | NA      | NA      | 3       | 9.7  | -0.2418 | NA      | NA      | NA      | NA      | NA     | NA     |    |
| 732 | P61513 | RPL37A   | 60S ribosomal p   | sp | P61513 | RL37A_HUMAN | 3  | 29.3 | -0.005171 | 0.9846    | 0.999   | -0.0688 | 0.9846  | 0.99899 | 1       | 19.6 | NA      | NA      | NA      | NA      | NA      | NA     | NA     |    |
| 733 | P61586 | RHOA     | Transforming pr   | sp | P61586 | RHOA_HUMAN  | 3  | 18.7 | NA        | NA        | NA      | NA      | NA      | NA      | 7       | 51.3 | 0.19225 | 0.59048 | 0.9991  | 0.6067  | 0.5905  | 0.9991 | NA     |    |
| 734 | P61604 | HSPE1    | 10 kDa heat sho   | sp | P61604 | CH10_HUMAN  | 8  | 68.6 | -0.07144  | 0.81837   | 0.9991  | 0.5639  | 0.08366 | 0.23536 | 10      | 74.5 | 0.31798 | 0.31405 | 0.9973  | 1.62221 | #####   | 0.0003 | 1      |    |
| 735 | P61619 | SEC61A1  | Protein transpor  | sp | P61619 | S61A1_HUMAN | 3  | 6.1  | -0.111437 | 0.78045   | 0.9984  | 1.5568  | 0.78045 | 0.99836 | 3       | 6.7  | -0.3764 | NA      | NA      | NA      | NA      | NA     | NA     |    |
| 736 | P61758 | VPB1     | Prefoldin subuni  | sp | P61758 | PFD3_HUMAN  | 1  | 6.1  | NA        | NA        | NA      | NA      | NA      | NA      | 8       | 46.2 | -0.1822 | 0.61503 | 0.9991  | 0.89587 | 0.615   | 0.9991 | NA     |    |
| 737 | P61923 | COPZ1    | Coatomer subun    | sp | P61923 | COPZ1_HUMAN | 2  | 13.6 | -0.02486  | NA        | NA      | NA      | NA      | NA      | 3       | 22   | NA      | NA      | NA      | NA      | NA      | NA     | NA     |    |
| 738 | P61956 | SUMO2    | Small ubiquitin-r | sp | P61956 | SUMO2_HUMA  | 2  | 23.2 | -0.525962 | 0.1171    | 0.9991  | -0.0464 | 0.88564 | 0.9344  | 2       | 23.2 | 0.04382 | 0.89205 | 0.9973  | -0.7126 | 0.0392  | 0.0705 | 4      |    |
| 739 | P61970 | NUTF2    | Nuclear transpo   | sp | P61970 | NTF2_HUMAN  | 3  | 24.4 | 0.51663   | 0.13082   | 0.9991  | -0.6108 | 0.11164 | 0.27928 | 5       | 56.7 | -0.0904 | 0.78376 | 0.9973  | -0.6788 | 0.0529  | 0.0916 | NA     |    |
| 740 | P61978 | HNRNPK   | Heterogeneous     | sp | P61978 | HNRPK_HUMAN | 26 | 56.4 | -0.088142 | 0.58293   | 0.9991  | 0.1138  | 0.47971 | 0.65533 | 25      | 64.8 | 0.05722 | 0.72075 | 0.9973  | 0.91175 | #####   | 0.0002 | 1      |    |
| 741 | P61981 | YWHAG    | 14-3-3 protein g  | sp | P61981 | 1433G_HUMAN | 16 | 62.8 | 0.0369342 | 0.83901   | 0.9991  | -0.4906 | 0.01425 | 0.07895 | 17      | 77.3 | -0.1246 | 0.49607 | 0.9973  | 1.02849 | #####   | 0.0002 | 2      |    |
| 742 | P62070 | RRAS2    | Ras-related prot  | sp | P62070 | RRAS2_HUMAN | 2  | 9.3  | 0.1096402 | 0.8261    | 0.9984  | -1.132  | 0.8261  | 0.99836 | NA      | NA   | NA      | NA      | NA      | NA      | NA      | NA     | NA     |    |
| 743 | P62081 | RPS7     | 40S ribosomal p   | sp | P62081 | RS7_HUMAN   | 40 | 11   | 64.4      | -0.005991 | 0.98311 | 0.9991  | -0.3167 | 0.27229 | 0.4737  | 13   | 61.3    | 0.08651 | 0.76021 | 0.9973  | -0.8842 | 0.0058 | 0.014  | 4  |
| 744 | P62140 | PPP1CB   | Serine/threonin   | sp | P62140 | PP1B_HUMAN  | 9  | 4    | 15.3      | NA        | NA      | NA      | NA      | NA      | NA      | 15   | 55.7    | 0.37944 | 0.17134 | 0.9991  | 1.09342 | 0.1713 | 0.9991 | NA |
| 745 | P62191 | PSMC1    | 26S proteasome    | sp | P62191 | PRS4_HUMAN  | 2  | 11   | 34.3      | -0.061063 | 0.75227 | 0.9991  | -0.4221 | 0.04097 | 0.1513  | 14   | 44.5    | 0.23342 | 0.23717 | 0.9973  | -0.7653 | 0.0009 | 0.0031 | 4  |
| 746 | P62195 | PSMC5    | 26S proteasome    | sp | P62195 | PRS8_HUMAN  | 2  | 13   | 42.9      | 0.0271766 | 0.87532 | 0.9991  | -0.0325 | 0.85114 | 0.91851 | 16   | 53      | -0.0214 | 0.90163 | 0.9973  | -0.4265 | 0.0233 | 0.0458 | 4  |
| 747 | P62241 | RPS8     | 40S ribosomal p   | sp | P62241 | RS8_HUMAN   | 40 | 6    | 26.9      | 0.3219622 | 0.58077 | 0.9991  | -0.8896 | 0.13863 | 0.3043  | 9    | 46.2    | -0.3249 | 0.57733 | 0.9973  | -0.1806 | 0.7559 | 0.8049 | NA |
| 748 | P62244 | RPS15A   | 40S ribosomal p   | sp | P62244 | RS15A_HUMAN | 5  | 30.8 | -0.327826 | 0.47618   | 0.9991  | 0.1481  | 0.77186 | 0.88037 | 6       | 36.9 | -0.0081 | 0.98577 | 0.9973  | 1.1043  | 0.0262  | 0.0499 | 1      |    |
| 749 | P62249 | RPS16    | 40S ribosomal p   | sp | P62249 | RS16_HUMAN  | 4  | 10   | 56.2      | 0.0432977 | 0.90913 | 0.9991  | -0.8333 | 0.04002 | 0.14855 | 9    | 54.8    | 0.05317 | 0.88855 | 0.9973  | -0.593  | 0.1315 | 0.1972 | 3  |
| 750 | P62253 | UBE2G1   | Ubiquitin-conjug  | sp | P62253 | UB2G1_HUMAN | 1  | 7.1  | NA        | NA        | NA      | NA      | NA      | NA      | 2       | 16.5 | 0.03902 | NA      | NA      | NA      | NA      | NA     | NA     |    |
| 751 | P62258 | YWHAE    | 14-3-3 protein e  | sp | P62258 | 1433E_HUMAN | 20 | 67.5 | 0.1083765 | 0.56106   | 0.9991  | -0.5444 | 0.00867 | 0.06085 | 20      | 75.7 | 0.03417 | 0.85388 | 0.9973  | -1.3553 | #####   | #####  | 4      |    |
| 752 | P62263 | RPS14    | 40S ribosomal p   | sp | P62263 | RS14_HUMAN  | 4  | 5    | 31.8      | 0.5861178 | 0.14802 | 0.9991  | -0.5972 | 0.14098 | 0.3085  | 7    | 39.1    | 0.55445 | 0.16977 | 0.9973  | 0.47016 | 0.2405 | 0.3248 | NA |
| 753 | P62266 | RPS23    | 40S ribosomal p   | sp | P62266 | RS23_HUMAN  | 4  | 3    | 21        | 0.9939365 | 0.01274 | 0.9991  | 0.2608  | 0.47355 | 0.65068 | 4    | 28.7    | 0.26447 | 0.46741 | 0.9973  | -0.9606 | 0.0155 | 0.0325 | 5  |
| 754 | P62269 | RPS18    | 40S ribosomal p   | sp | P62269 | RS18_HUMAN  | 4  | 8    | 37.5      | 1.3073385 | 0.00102 | 0.7197  | 0.3248  | 0.33603 | 0.536   | 10   | 52.6    | -0.5089 | 0.13959 | 0.9973  | -1.2379 | 0.0016 | 0.0047 | 5  |
| 755 | P62277 | RPS13    | 40S ribosomal p   | sp | P62277 | RS13_HUMAN  | 4  | 4    | 26.5      | -0.12428  | 0.70432 | 0.9991  | -0.466  | 0.16649 | 0.34057 | 7    | 47      | -0.0999 | 0.76003 | 0.9973  | 1.24346 | 0.0013 | 0.0041 | 2  |
| 756 | P62280 | RPS11    | 40S ribosomal p   | sp | P62280 | RS11_HUMAN  | 4  | 5    | 22.8      | 0.1341827 | 0.74805 | 0.9991  | -0.0545 | 0.89603 | 0.93506 | 9    | 40.5    | -0.2336 | 0.5772  | 0.9973  | -0.7801 | 0.0753 | 0.1262 | NA |
| 757 | P62306 | SNRPF    | Small nuclear rib | sp | P62306 | RUXF_HUMAN  | 2  | 24.4 | 0.3076112 | 0.46241   | 0.9984  | 0.4901  | 0.46241 | 0.99836 | 2       | 24.4 | -0.0305 | NA      | NA      | NA      | NA      | NA     | NA     |    |
| 758 | P62314 | SNRPD1   | Small nuclear rib | sp | P62314 | SMD1_HUMAN  | 3  | 43.7 | 0.4414644 | 0.27052   | 0.9991  | 0.0529  | 0.89299 | 0.93506 | 3       | 43.7 | 0.59938 | 0.14065 | 0.9973  | -0.1928 | 0.6251  | 0.7114 | NA     |    |
| 759 | P62316 | SNRPD2   | Small nuclear rib | sp | P62316 | SMD2_HUMAN  | 4  | 39.8 | 0.6641614 | 0.02408   | 0.9991  | 0.3256  | 0.24022 | 0.43895 | 6       | 55.9 | -0.2361 | 0.38957 | 0.9973  | -0.6236 | 0.0326  | 0.0603 | 5      |    |
| 760 | P62318 | SNRPD3   | Small nuclear rib | sp | P62318 | SMD3_HUMAN  | 6  | 54.8 | -0.08517  | 0.71409   | 0.9991  | -0.2963 | 0.25461 | 0.45129 | 6       | 54.8 | -0.0787 | 0.70516 | 0.9973  | 0.26999 | 0.2061  | 0.2935 | NA     |    |
| 761 | P62330 | ARF6     | ADP-ribosylation  | sp | P62330 | ARF6_HUMAN  | 3  | 24.6 | NA        | NA        | NA      | NA      | NA      | NA      | 3       | 24.6 | 0.42676 | 0.44725 | 0.9991  | -1.4646 | 0.4472  | 0.9991 | NA     |    |
| 762 | P62333 | PSMC6    | 26S proteasome    | sp | P62333 | PRS10_HUMAN | 11 | 38.3 | 0.0219164 | 0.92258   | 0.9991  | -0.3725 | 0.11249 | 0.27928 | 14      | 46.3 | 0.12359 | 0.58537 | 0.9973  | 0.39089 | 0.097   | 0.1553 | NA     |    |
| 763 | P62424 | RPL7A    | 60S ribosomal p   | sp | P62424 | RL7A_HUMAN  | 6  | 7    | 24.8      | 0.3322452 | 0.51689 | 0.9991  | -0.0984 | 0.84686 | 0.91851 | 9    | 33.8    | 0.23397 | 0.647   | 0.9973  | 0.7116  | 0.1747 | 0.2549 | NA |
| 764 | P62491 | RAB11A   | Ras-related prot  | sp | P62491 | RB11A_HUMAN | 8  | 37   | -0.049649 | 0.81528   | 0.9991  | -0.0755 | 0.72279 | 0.84844 | 10      | 49.1 | -0.4276 | 0.05732 | 0.9973  | 0.37925 | 0.0881  | 0.1435 | NA     |    |



|     |        |          |                   |                       |    |      |           |           |         |         |         |         |         |      |         |         |         |         |         |        |        |    |
|-----|--------|----------|-------------------|-----------------------|----|------|-----------|-----------|---------|---------|---------|---------|---------|------|---------|---------|---------|---------|---------|--------|--------|----|
| 765 | P62495 | ETF1     | Eukaryotic peptid | sp P62495 ERF1_HUMAN  | 13 | 40   | 0.0049231 | 0.97487   | 0.9991  | -0.6523 | 0.0006  | 0.01696 | 13      | 36.6 | 0.02397 | 0.8781  | 0.9973  | -0.89   | #####   | 0.0002 | 3      |    |
| 766 | P62633 | CNBP     | Cellular nucleic  | sp P62633 CNBP_HUMAN  | 3  | 15.3 | NA        | NA        | NA      | NA      | NA      | NA      | 7       | 42.4 | -0.4188 | 0.34481 | 0.9991  | -0.201  | 0.3448  | 0.9991 | NA     |    |
| 767 | P62701 | RPS4X    | 40S ribosomal p   | sp P62701 RS4X_HUMAN  | 14 | 52.1 | 0.0234207 | 0.92123   | 0.9991  | -0.4067 | 0.09999 | 0.26258 | 16      | 55.1 | -0.0649 | 0.78434 | 0.9973  | -0.7743 | 0.0042  | 0.0108 | 4      |    |
| 768 | P67775 | PPP2CA   | Serine/threonin   | sp P67775 PP2AA_HUMAN | 2  | 8.4  | NA        | NA        | NA      | NA      | NA      | NA      | 8       | 41.7 | -0.1955 | 0.6693  | 0.9991  | -0.8153 | 0.6693  | 0.9991 | NA     |    |
| 769 | P62750 | RPL23A   | 60S ribosomal p   | sp P62750 RL23A_HUMAN | 7  | 43.6 | 0.1503742 | 0.61001   | 0.9991  | 0.079   | 0.78801 | 0.88965 | 8       | 45.5 | 0.08767 | 0.76556 | 0.9973  | 0.13874 | 0.6377  | 0.7188 | NA     |    |
| 770 | P62753 | RPS6     | 40S ribosomal p   | sp P62753 RS6_HUMAN   | 40 | 6    | 20.9      | 0.2233786 | 0.62809 | 0.9991  | -0.2859 | 0.53626 | 0.7002  | 8    | 25.7    | -0.1022 | 0.82414 | 0.9973  | -0.142  | 0.7577 | 0.8054 | NA |
| 771 | P62760 | VSNL1    | Visinin-like prot | sp P62760 VISL1_HUMAN | 7  | 37.2 | 0.3141829 | 0.2759    | 0.9984  | 0.1292  | 0.2759  | 0.99836 | NA      | NA   | NA      | NA      | NA      | NA      | NA      | NA     | NA     |    |
| 772 | P62805 | HIST1H4A | Histone H4        | sp P62805 H4_HUMAN    | Hi | 11   | 60.2      | -0.400551 | 0.321   | 0.9991  | 0.0196  | 0.96071 | 0.97306 | 11   | 63.1    | 0.36278 | 0.36744 | 0.9973  | 0.43561 | 0.2818 | 0.3673 | NA |
| 773 | P62820 | RAB1A    | Ras-related prot  | sp P62820 RAB1A_HUMAN | 10 | 58   | -0.13273  | 0.59447   | 0.9991  | 0.3864  | 0.13312 | 0.29964 | 11      | 62   | 0.15269 | 0.54083 | 0.9973  | -0.3891 | 0.1306  | 0.1962 | NA     |    |
| 774 | P62826 | RAN      | GTP-binding nuc   | sp P62826 RAN_HUMAN   | G  | 7    | 30.1      | 0.3011265 | 0.18408 | 0.9991  | -0.4477 | 0.05545 | 0.18284 | 9    | 44.4    | 0.15898 | 0.4744  | 0.9973  | 0.0784  | 0.7226 | 0.7823 | NA |
| 775 | P62829 | RPL23    | 60S ribosomal p   | sp P62829 RL23_HUMAN  | 6  | 3    | 18.6      | -0.949202 | 0.00514 | 0.9991  | -0.4513 | 0.18549 | 0.36632 | 7    | 62.9    | 0.05657 | 0.84852 | 0.9973  | -0.127  | 0.6687 | 0.7443 | 3  |
| 776 | P62841 | RPS15    | 40S ribosomal p   | sp P62841 RS15_HUMAN  | 4  | 1    | 8.3       | NA        | NA      | NA      | NA      | NA      | 5       | 57.9 | -0.0076 | 0.98959 | 0.9973  | -0.5297 | 0.3683  | 0.463  | NA     |    |
| 777 | P62847 | RPS24    | 40S ribosomal p   | sp P62847 RS24_HUMAN  | 4  | 5    | 39.8      | 0.2350329 | 0.47485 | 0.9991  | -0.1784 | 0.58628 | 0.74361 | 4    | 33.8    | 0.16739 | 0.60938 | 0.9973  | -1.0682 | 0.0042 | 0.0107 | 4  |
| 778 | P62851 | RPS25    | 40S ribosomal p   | sp P62851 RS25_HUMAN  | 4  | 3    | 22.4      | -0.099456 | 0.78478 | 0.9991  | -0.6561 | 0.12134 | 0.2853  | 4    | 31.2    | -0.0897 | 0.80546 | 0.9973  | 1.89214 | #####  | 0.0004 | 2  |
| 779 | P62854 | RPS26    | 40S ribosomal p   | sp P62854 RS26_HUMAN  | 4  | 1    | 13        | NA        | NA      | NA      | NA      | NA      | 3       | 27   | -0.9001 | 0.025   | 0.9991  | -0.0055 | 0.025   | 0.9991 | NA     |    |
| 780 | P62857 | RPS28    | 40S ribosomal p   | sp P62857 RS28_HUMAN  | 4  | 5    | 56.5      | 0.1080976 | 0.84909 | 0.9991  | 0.2289  | 0.74251 | 0.8616  | 5    | 56.5    | 0.14152 | 0.7251  | 0.9973  | 1.74708 | 0.0008 | 0.0025 | 1  |
| 781 | P62873 | GNB1     | Guanine nucleot   | sp P62873 GBB1_HUMAN  | 1  | 8    | 29.4      | 0.0578879 | 0.81869 | 0.9991  | 0.2175  | 0.39418 | 0.60102 | 10   | 32.6    | -0.0618 | 0.80659 | 0.9973  | -0.6448 | 0.0193 | 0.0391 | 5  |
| 782 | P62875 | POLR2L   | DNA-directed RN   | sp P62875 RPA85_HUMAN | 1  | 2    | 29.9      | NA        | NA      | NA      | NA      | NA      | 2       | 29.9 | 0.07296 | 0.87616 | 0.9991  | 0.98381 | 0.8762  | 0.9991 | NA     |    |
| 783 | P62879 | GNB2     | Guanine nucleot   | sp P62879 GBB2_HUMAN  | 1  | 5    | 19.4      | NA        | NA      | NA      | NA      | NA      | 9       | 36.2 | -0.0123 | 0.96571 | 0.9991  | 0.63996 | 0.9657  | 0.9991 | NA     |    |
| 784 | P62888 | RPL30    | 60S ribosomal p   | sp P62888 RL30_HUMAN  | 6  | 6    | 55.7      | 0.0674135 | 0.87236 | 0.9991  | -0.0325 | 0.93817 | 0.96022 | 7    | 66.1    | 0.24112 | 0.56738 | 0.9973  | -1.1297 | 0.0145 | 0.0306 | 4  |
| 785 | P62899 | RPL31    | 60S ribosomal p   | sp P62899 RL31_HUMAN  | 6  | 8    | 47.2      | 0.2884424 | 0.40472 | 0.9991  | 0.1422  | 0.6788  | 0.81572 | 6    | 39.2    | 0.05667 | 0.8686  | 0.9973  | -0.2905 | 0.4015 | 0.4959 | NA |
| 786 | P62906 | RPL10A   | 60S ribosomal p   | sp P62906 RL10A_HUMAN | 10 | 8    | 42.4      | 0.1759507 | 0.5227  | 0.9991  | -0.6452 | 0.0289  | 0.12495 | 10   | 48.4    | -0.0089 | 0.97393 | 0.9973  | -0.7227 | 0.0161 | 0.0338 | 3  |
| 787 | P62910 | RPL32    | 60S ribosomal p   | sp P62910 RL32_HUMAN  | 6  | 2    | 17        | NA        | NA      | NA      | NA      | NA      | 3       | 22.2 | 0.11699 | 0.85491 | 0.9991  | 0.50252 | 0.8549  | 0.9991 | NA     |    |
| 788 | P62913 | RPL11    | 60S ribosomal p   | sp P62913 RL11_HUMAN  | 6  | 4    | 20.8      | 0.0655392 | 0.80367 | 0.9991  | 0.0457  | 0.8623  | 0.92074 | 5    | 28.7    | -0.0668 | 0.79996 | 0.9973  | -0.0632 | 0.8106 | 0.8465 | NA |
| 789 | P62917 | RPL8     | 60S ribosomal p   | sp P62917 RL8_HUMAN   | 60 | 2    | 9.3       | 0.3764509 | 0.4217  | 0.9991  | 0.1199  | 0.79619 | 0.89461 | 5    | 18.7    | -0.4697 | 0.31879 | 0.9973  | 0.06718 | 0.8849 | 0.9079 | NA |
| 790 | P62937 | PPIA     | Peptidyl-prolyl   | sp P62937 PPIA_HUMAN  | F  | 12   | 73.9      | 0.2432771 | 0.3669  | 0.9991  | -0.9432 | 0.00234 | 0.02957 | 13   | 74.5    | -0.1703 | 0.52486 | 0.9973  | 2.02207 | #####  | #####  | 2  |
| 791 | P62942 | FKBP1A   | Peptidyl-prolyl   | sp P62942 FKB1A_HUMAN | 1  | 2    | 29.6      | NA        | NA      | NA      | NA      | NA      | 6       | 64.8 | 0.00608 | 0.99024 | 0.9992  | 0.74819 | 0.9902  | 0.9992 | NA     |    |
| 792 | P62995 | TRA2B    | Transformer-2 p   | sp P62995 TRA2B_HUMAN | 1  | 5    | 19.8      | -0.733889 | 0.12252 | 0.9991  | 0.8837  | 0.06889 | 0.20962 | 3    | 13.9    | 0.00599 | 0.98655 | 0.9973  | -0.185  | 0.6049 | 0.6929 | NA |
| 793 | P63010 | AP2B1    | AP-2 complex su   | sp P63010 AP2B1_HUMAN | 1  | 12   | 14.6      | -0.005087 | 0.98003 | 0.9991  | 0.2817  | 0.1779  | 0.35476 | 21   | 25      | -0.4135 | 0.05502 | 0.9973  | -0.2172 | 0.2934 | 0.3782 | NA |
| 794 | Q15836 | VAMP3    | Vesicle-associat  | sp Q15836 VAMP3_HUMA  | 1  | 1    | 24        | NA        | NA      | NA      | NA      | NA      | 3       | 40   | -0.066  | 0.73781 | 0.9991  | -1.5783 | 0.7378  | 0.9991 | NA     |    |
| 795 | P63092 | GNAS     | Guanine nucleot   | sp P63092 GNAS2_HUMA  | 1  | 2    | 6.1       | NA        | NA      | NA      | NA      | NA      | 12      | 16.5 | -0.0191 | 0.93922 | 0.9991  | 2.08617 | 0.9392  | 0.9991 | NA     |    |
| 796 | P63098 | PPP3R1   | Calcineurin subu  | sp P63098 CANB1_HUMAN | 1  | 1    | 7.1       | NA        | NA      | NA      | NA      | NA      | 5       | 32.9 | -0.1992 | 0.40765 | 0.9991  | 0.16838 | 0.4077  | 0.9991 | NA     |    |
| 797 | P63104 | YWHAZ    | 14-3-3 protein z  | sp P63104 1433Z_HUMAN | 1  | 18   | 68.6      | 0.2219987 | 0.20023 | 0.9991  | -0.6213 | 0.00174 | 0.02746 | 21   | 72.2    | -0.0947 | 0.57694 | 0.9973  | 0.39276 | 0.0309 | 0.0575 | 2  |
| 798 | P63151 | PPP2R2A  | Serine/threonin   | sp P63151 2ABA_HUMAN  | 1  | 3    | 8.7       | NA        | NA      | NA      | NA      | NA      | 7       | 21.5 | 0.10953 | 0.64474 | 0.9991  | -0.338  | 0.6447  | 0.9991 | NA     |    |
| 799 | P63165 | SUMO1    | Small ubiquitin-r | sp P63165 SUMO1_HUMA  | 1  | 4    | 35.6      | 0.4277881 | 0.36315 | 0.9991  | 0.7689  | 0.11296 | 0.27928 | 4    | 36.6    | 0.65667 | 0.32485 | 0.9973  | 3.03838 | #####  | #####  | 1  |
| 800 | P63167 | DYNLL1   | Dynein light cha  | sp P63167 DYL1_HUMAN  | 1  | 2    | 37.1      | -0.11552  | 0.83393 | 0.9991  | 0.1762  | 0.77497 | 0.8815  | 3    | 44.9    | -0.2912 | 0.59854 | 0.9973  | -1.3931 | 0.021  | 0.0415 | 4  |
| 801 | P63173 | RPL38    | 60S ribosomal p   | sp P63173 RL38_HUMAN  | 6  | 2    | 28.6      | -0.090247 | 0.84551 | 0.9991  | -0.4468 | 0.34275 | 0.54364 | 3    | 38.6    | 0.15783 | 0.73367 | 0.9973  | -0.8309 | 0.0611 | 0.1039 | NA |
| 802 | P63208 | SKP1     | S-phase kinase-a  | sp P63208 SKP1_HUMAN  | 1  | 7    | 60.7      | -0.451928 | 0.10071 | 0.9991  | -0.3359 | 0.21397 | 0.40353 | 10   | 65.6    | -0.3612 | 0.18303 | 0.9973  | -0.107  | 0.6859 | 0.7593 | NA |
| 803 | P63220 | RPS21    | 40S ribosomal p   | sp P63220 RS21_HUMAN  | 4  | 4    | 48.2      | 0.0357224 | 0.8963  | 0.9991  | -0.0848 | 0.75743 | 0.87178 | 6    | 67.5    | 0.62568 | 0.03367 | 0.9973  | 0.75788 | 0.0124 | 0.0266 | 2  |
| 804 | P63241 | EIF5A    | Eukaryotic trans  | sp P63241 IF5A1_HUMAN | 1  | 7    | 69.5      | 0.2089738 | 0.3078  | 0.9991  | -0.464  | 0.03245 | 0.12854 | 13   | 88.3    | 0.15636 | 0.44218 | 0.9973  | 0.15244 | 0.4535 | 0.545  | 3  |
| 805 | P63244 | RACK1    | Receptor of activ | sp P63244 RACK1_HUMAN | 1  | 15   | 49.2      | -0.058547 | 0.71051 | 0.9991  | -0.7218 | 0.00025 | 0.00995 | 18   | 62.1    | 0.13106 | 0.41005 | 0.9973  | -0.5531 | 0.0025 | 0.007  | 3  |
| 806 | P63261 | ACTG1    | Actin, cytoplasm  | sp P63261 ACTG_HUMAN  | 1  | 29   | 88.8      | -0.204962 | 0.30324 | 0.9991  | -0.4316 | 0.03942 | 0.1471  | 31   | 88.3    | -0.0845 | 0.66704 | 0.9973  | -0.6202 | 0.0053 | 0.0131 | 3  |
| 807 | P63279 | UBE2I    | SUMO-conjugati    | sp P63279 UBC9_HUMAN  | 1  | 2    | 13.9      | 0.5010419 | 0.21995 | 0.9991  | -1.0383 | 0.03126 | 0.12742 | 5    | 46.8    | 0.67983 | 0.10273 | 0.9973  | 2.90912 | #####  | #####  | 2  |
| 808 | P67809 | YBX1     | Nuclease-sensiti  | sp P67809 YBOX1_HUMAN | 1  | 14   | 54        | 0.305585  | 0.20772 | 0.9991  | 0.3841  | 0.11827 | 0.28521 | 14   | 54      | -0.0156 | 0.94727 | 0.9973  | 0.25466 | 0.2902 | 0.3754 | NA |
| 809 | P67870 | CSNK2B   | Casein kinase II  | sp P67870 CSK2B_HUMAN | 1  | 3    | 21.9      | 0.3616235 | 0.24702 | 0.9991  | 0.6182  | 0.11654 | 0.28201 | 5    | 29.3    | 0.34232 | 0.17152 | 0.9973  | -0.18   | 0.4571 | 0.5484 | NA |
| 810 | P67936 | TPM4     | Rhomyosin alpa    | sp P67936 TPM4_HUMAN  | 1  | 25   | 77.4      | 0.2895723 | 0.23768 | 0.9991  | 0.1256  | 0.60227 | 0.7531  | 30   | 80.2    | 0.06249 | 0.79469 | 0.9973  | 0.07128 | 0.7667 | 0.8125 | NA |
| 811 | P68133 | ACTA1    | Actin, alpha ske  | sp P68133 ACTS_HUMAN  | 1  | 17   | 38.7      | -0.463123 | 0.1921  | 0.9991  | -0.1178 | 0.76036 | 0.87233 | 14   | 32.4    | 0.175   | 0.61349 | 0.9973  | 0.04704 | 0.8916 | 0.9082 | NA |
| 812 | P68104 | EEF1A1   | Elongation facto  | sp P68104 EF1A1_HUMAN | 1  | 30   | 61.7      | -0.152417 | 0.43746 | 0.9991  | -0.9618 | 0.00012 | 0.00755 | 28   | 72.5    | 0.00427 | 0.98246 | 0.9973  | -0.2412 | 0.2255 | 0.3087 | 3  |

|     |        |          |                   |                       |    |      |           |          |         |         |          |         |         |      |         |         |         |         |         |        |        |   |
|-----|--------|----------|-------------------|-----------------------|----|------|-----------|----------|---------|---------|----------|---------|---------|------|---------|---------|---------|---------|---------|--------|--------|---|
| 813 | P68363 | TUBA1B   | Tubulin alpha-1B  | sp P68363 TBA1B_HUMAN | 17 | 45.7 | 0.0822906 | 0.73751  | 0.9991  | -0.8057 | 0.00407  | 0.03837 | 26      | 66.1 | 0.22368 | 0.36758 | 0.9973  | 0.97935 | 0.0009  | 0.0029 | 2      |   |
| 814 | P68366 | TUBA4A   | Tubulin alpha-4A  | sp P68366 TBA4A_HUMAN | 14 | 36.8 | 0.1447371 | NA       | NA      | NA      | NA       | NA      | 22      | 57.8 | 0.20123 | NA      | NA      | NA      | NA      | NA     | NA     |   |
| 815 | P68371 | TUBB4B   | Tubulin beta-4B   | sp P68371 TBB4B_HUMAN | 17 | 41.6 | -0.189852 | 0.29231  | 0.9991  | -1.2091 | 3.00E-06 | 0.00188 | 23      | 68.3 | -0.0856 | 0.63034 | 0.9973  | 1.67607 | #####   | #####  | 2      |   |
| 816 | P68400 | CSNK2A1  | Casein kinase II  | sp P68400 CSK21_HUMAN | 2  | 7.2  | -0.70289  | NA       | NA      | NA      | NA       | NA      | 7       | 27.4 | 0.11216 | 0.71479 | 0.9991  | -0.1714 | 0.7148  | 0.9991 | NA     |   |
| 817 | P69849 | NOMO3    | Nodal modulator   | sp P69849 NOMO3_HUMA  | 12 | 13.5 | 0.0806778 | 0.77697  | 0.9991  | 0.4178  | 0.15486  | 0.32873 | 9       | 9.3  | -0.0468 | 0.86926 | 0.9973  | -1.0974 | 0.0012  | 0.0037 | 5      |   |
| 818 | P78344 | EIF4G2   | Eukaryotic trans  | sp P78344 IF4G2_HUMAN | 7  | 7.2  | 0.3357318 | 0.16386  | 0.9991  | -0.3888 | 0.24893  | 0.44682 | 16      | 18.5 | 0.06676 | 0.77464 | 0.9973  | -0.4815 | 0.0534  | 0.0921 | NA     |   |
| 819 | P78347 | GTF2I    | General transcri  | sp P78347 GTF2I_HUMAN | 15 | 18.8 | -0.044007 | 0.83228  | 0.9984  | 0.3702  | 0.83228  | 0.99836 | 14      | 18.8 | NA      | NA      | NA      | NA      | NA      | NA     | NA     |   |
| 820 | P78371 | CCT2     | T-complex prote   | sp P78371 TCPB_HUMAN  | 24 | 62.8 | 0.1015651 | 0.59093  | 0.9991  | -0.4382 | 0.03066  | 0.12742 | 28      | 69.9 | 0.00721 | 0.96944 | 0.9973  | -0.5912 | 0.0056  | 0.0136 | 3      |   |
| 821 | P78527 | PRKDC    | DNA-dependent     | sp P78527 PRKDC_HUMAN | 55 | 15.1 | -0.033761 | 0.93992  | 0.9991  | 0.0784  | 0.86109  | 0.92074 | 68      | 20.7 | -0.4901 | 0.37829 | 0.9973  | 5.84147 | #####   | #####  | 1      |   |
| 822 | P80723 | BASP1    | Brain acid solubl | sp P80723 BASP1_HUMAN | 14 | 76.7 | 0.3595211 | 0.25605  | 0.9984  | 0.3116  | 0.25605  | 0.99836 | 12      | 68.3 | NA      | NA      | NA      | NA      | NA      | NA     | NA     |   |
| 823 | P82650 | MRPS22   | 28S ribosomal p   | sp P82650 RT22_HUMAN  | 4  | 10.8 | 0.2537301 | 0.34242  | 0.9984  | 0.5372  | 0.34242  | 0.99836 | 5       | 14.4 | NA      | NA      | NA      | NA      | NA      | NA     | NA     |   |
| 824 | P82970 | HMGNS    | High mobility gr  | sp P82970 HMGNS_HUMA  | 6  | 27.7 | 0.2954159 | 0.32623  | 0.9984  | 0.5923  | 0.32623  | 0.99836 | 2       | 8.2  | NA      | NA      | NA      | NA      | NA      | NA     | NA     |   |
| 825 | P82979 | SARNP    | SAP domain-con    | sp P82979 SARNP_HUMAN | 7  | 34.3 | 0.1519241 | 0.61561  | 0.9991  | 0.3352  | 0.27501  | 0.47673 | 7       | 35.7 | 0.1249  | 0.67938 | 0.9973  | 1.67861 | #####   | 0.0002 | 1      |   |
| 826 | P83916 | CBX1     | Chromobox prot    | sp P83916 CBX1_HUMAN  | 6  | 41.6 | 0.3682383 | 0.10108  | 0.9991  | 0.2219  | 0.4674   | 0.64919 | 4       | 30.3 | -0.1647 | 0.44608 | 0.9973  | -1.2521 | #####   | 0.0002 | 4      |   |
| 827 | P84085 | ARF5     | ADP-ribosylation  | sp P84085 ARF5_HUMAN  | 4  | 31.7 | 0.2683051 | 0.49602  | 0.9991  | 0.1168  | 0.80692  | 0.9038  | 7       | 56.1 | 0.0502  | 0.8555  | 0.9973  | -1.0481 | 0.0197  | 0.0397 | 4      |   |
| 828 | P84090 | ERH      | Enhancer of rudi  | sp P84090 ERH_HUMAN   | 3  | 27.9 | -0.096773 | 0.72746  | 0.9984  | -0.1323 | 0.72746  | 0.99836 | 4       | 44.2 | NA      | NA      | NA      | 2.81819 | NA      | NA     | NA     |   |
| 829 | P84098 | RPL19    | 60S ribosomal p   | sp P84098 RL19_HUMAN  | 6  | 1    | 8.7       | NA       | NA      | NA      | NA       | NA      | 4       | 21.9 | -2.1766 | 0.00251 | 0.9991  | 0.74138 | 0.0025  | 0.9991 | NA     |   |
| 830 | P84103 | SRSF3    | Serine/arginine   | sp P84103 SRSF3_HUMAN | 5  | 35.4 | 0.1168877 | 0.71021  | 0.9991  | 1.0441  | 0.00374  | 0.03699 | 6       | 35.4 | -0.1131 | 0.71909 | 0.9973  | 2.34088 | #####   | #####  | 1      |   |
| 831 | P99999 | CYCS     | Cytochrome c      | sp P99999 CYC_HUMAN   | 3  | 27.6 | -0.448914 | 0.2236   | 0.9984  | -1.2782 | 0.2236   | 0.99836 | 3       | 30.5 | NA      | NA      | NA      | NA      | NA      | NA     | NA     |   |
| 832 | Q00059 | TFAM     | Transcription fac | sp Q00059 TFAM_HUMAN  | 2  | 6.1  | 0.9521459 | 0.01515  | 0.9984  | 0.0059  | 0.01515  | 0.99836 | 5       | 19.9 | NA      | NA      | NA      | NA      | NA      | NA     | NA     |   |
| 833 | Q00169 | PITPNA   | Phosphatidylinos  | sp Q00169 PIPNA_HUMAN | 1  | 7    | NA        | NA       | NA      | NA      | NA       | NA      | 7       | 39.6 | 0.05429 | NA      | NA      | NA      | NA      | NA     | NA     |   |
| 834 | Q00325 | SLC25A3  | Phosphate carrier | sp Q00325 MPCP_HUMAN  | 6  | 15.2 | -0.46251  | 0.11023  | 0.9991  | 0.1601  | 0.56677  | 0.72534 | 4       | 13   | -0.0134 | 0.96149 | 0.9973  | -0.4684 | 0.1061  | 0.1654 | NA     |   |
| 835 | Q00610 | CLTC     | Clathrin heavy c  | sp Q00610 CLH1_HUMAN  | 29 | 22.9 | -0.036898 | 0.88653  | 0.9991  | -0.1957 | 0.45309  | 0.63992 | 58      | 46.4 | -0.0415 | 0.87251 | 0.9973  | -0.2293 | 0.3808  | 0.4761 | NA     |   |
| 836 | Q00688 | FKBP3    | Peptidyl-prolyl d | sp Q00688 FKBP3_HUMAN | 5  | 25   | 0.023262  | 0.95402  | 0.9991  | -0.3114 | 0.44431  | 0.63003 | 10      | 50   | 0.21766 | 0.59119 | 0.9973  | 2.76258 | #####   | #####  | 2      |   |
| 837 | Q00765 | REEP5    | Receptor expres   | sp Q00765 REEP5_HUMAN | 3  | 14.8 | -0.288587 | 0.3214   | 0.9984  | 0.9898  | 0.3214   | 0.99836 | 2       | 10.6 | NA      | NA      | NA      | NA      | NA      | NA     | NA     |   |
| 838 | Q00839 | HNRNPU   | Heterogeneous     | sp Q00839 HNRPU_HUMA  | 22 | 34.4 | -0.115917 | 0.56825  | 0.9991  | 0.322   | 0.12482  | 0.2883  | 19      | 28.5 | 0.03571 | 0.85984 | 0.9973  | -0.3473 | 0.0998  | 0.1579 | NA     |   |
| 839 | Q01082 | SPTBN1   | Spectrin beta ch  | sp Q01082 SPTB2_HUMAN | 50 | 28.6 | 0.0322471 | 0.85664  | 0.9991  | 0.297   | 0.10988  | 0.27869 | 72      | 41.8 | -0.0815 | 0.64894 | 0.9973  | -0.5779 | 0.0045  | 0.0114 | 5      |   |
| 840 | Q01085 | TIAL1    | Nucleolysin TIA   | sp Q01085 TIAR_HUMAN  | 3  | 7.2  | -0.222604 | 0.38023  | 0.9991  | -0.016  | 0.96377  | 0.97378 | 5       | 16.3 | -0.2622 | 0.48795 | 0.9973  | 0.79436 | 0.0411  | 0.0732 | 1      |   |
| 841 | Q01105 | SET      | Protein SET       | sp Q01105 SET_HUMAN   | 5  | 24.1 | 0.325981  | 0.18646  | 0.9991  | -0.2684 | 0.27259  | 0.4737  | 7       | 33.8 | -0.0521 | 0.82839 | 0.9973  | 1.16687 | 0.0001  | 0.0006 | 2      |   |
| 842 | Q01130 | SRSF2    | Serine/arginine   | sp Q01130 SRSF2_HUMAN | 5  | 22.2 | 0.2018965 | 0.56964  | 0.9991  | -0.0072 | 0.98381  | 0.98799 | 4       | 21.7 | -0.1121 | 0.75136 | 0.9973  | -0.6356 | 0.0861  | 0.1419 | NA     |   |
| 843 | Q01469 | FABP5    | Fatty acid-bindin | sp Q01469 FABP5_HUMAN | 7  | 49.6 | 0.0940588 | 0.70259  | 0.9984  | -1.4995 | 0.70259  | 0.99836 | 8       | 67.4 | NA      | NA      | NA      | NA      | NA      | NA     | NA     |   |
| 844 | Q01518 | CAP1     | Adenylyl cyclase  | sp Q01518 CAP1_HUMAN  | 16 | 39.2 | -0.002034 | 0.99446  | 0.9991  | -1.3717 | 0.0002   | 0.00956 | 20      | 54.3 | 0.16448 | 0.57618 | 0.9973  | -0.0923 | 0.7529  | 0.8039 | 3      |   |
| 845 | Q01581 | HMGCS1   | Hydroxymethylgl   | sp Q01581 HMCS1_HUMA  | 15 | 37.9 | -0.054675 | 0.74777  | 0.9984  | -0.7169 | 0.74777  | 0.99836 | 5       | 11.2 | NA      | NA      | NA      | NA      | NA      | NA     | NA     |   |
| 846 | Q01628 | IFITM3   | Interferon-induc  | sp Q01628 IFM3_HUMAN  | 3  | 48.9 | -0.433914 | 0.06258  | 0.9984  | -0.0999 | 0.06258  | 0.99836 | NA      | NA   | NA      | NA      | NA      | NA      | NA      | NA     | NA     |   |
| 847 | Q01780 | EXOSC10  | Exosome compo     | sp Q01780 EXOSX_HUMAN | 6  | 8.2  | -0.074097 | 0.75966  | 0.9984  | 0.3207  | 0.75966  | 0.99836 | 2       | 2.8  | NA      | NA      | NA      | NA      | NA      | NA     | NA     |   |
| 848 | Q01813 | PFKP     | ATP-dependent     | sp Q01813 PFKAP_HUMAN | 5  | 9.8  | -0.532998 | NA       | NA      | NA      | NA       | NA      | 9       | 14.8 | NA      | NA      | NA      | NA      | NA      | NA     | NA     |   |
| 849 | Q01844 | EWSR1    | RNA-binding pro   | sp Q01844 EWS_HUMAN   | 4  | 9    | 0.1342201 | 0.63843  | 0.9991  | -0.0758 | 0.79032  | 0.89084 | 4       | 9    | -0.0028 | 0.99202 | 0.9973  | 1.19192 | 0.0006  | 0.002  | 2      |   |
| 850 | Q01995 | TAGLN    | Transgelin        | sp Q01995 TAGL_HUMAN  | 4  | 21.4 | -0.084502 | 0.72852  | 0.9984  | -0.8513 | 0.72852  | 0.99836 | NA      | NA   | NA      | NA      | NA      | NA      | NA      | NA     | NA     |   |
| 851 | Q02218 | OGDH     | 2-oxoglutarate d  | sp Q02218 ODO1_HUMAN  | 7  | 8.7  | -0.213413 | 0.38325  | 0.9991  | 0.1612  | 0.50762  | 0.68136 | 16      | 20.9 | -0.0242 | 0.90217 | 0.9973  | -1.0787 | #####   | 0.0004 | 4      |   |
| 852 | Q02543 | RPL18A   | 60S ribosomal p   | sp Q02543 RL18A_HUMAN | 5  | 27.3 | 0.0770135 | 0.90742  | 0.9991  | 0.3222  | 0.62781  | 0.77546 | 6       | 34.1 | 0.16271 | 0.80605 | 0.9973  | 0.8549  | 0.2079  | 0.2937 | NA     |   |
| 853 | Q02790 | FKBP4    | Peptidyl-prolyl d | sp Q02790 FKBP4_HUMAN | 20 | 51.6 | 0.1290141 | 0.80614  | 0.9991  | -0.4203 | 0.4282   | 0.6158  | 22      | 54.5 | 0.60729 | 0.25719 | 0.9973  | 2.6247  | 0.0001  | 0.0005 | 2      |   |
| 854 | Q02818 | NUCB1    | Nucleobindin-1    | sp Q02818 NUCB1_HUMA  | 6  | 17.8 | -0.244747 | 0.55845  | 0.9991  | 0.1029  | 0.82502  | 0.91397 | 18      | 51.4 | 0.7939  | 0.07093 | 0.9973  | 3.24773 | #####   | #####  | 1      |   |
| 855 | Q02878 | RPL6     | 60S ribosomal p   | sp Q02878 RL6_HUMAN   | 6  | 8    | 21.2      | 0.058634 | 0.91464 | 0.9991  | 0.7299   | 0.19382 | 0.37903 | 12   | 31.9    | -0.1322 | 0.80922 | 0.9973  | 1.28821 | 0.0291 | 0.0549 | 1 |
| 856 | Q02880 | TOP2B    | DNA topoisomer    | sp Q02880 TOP2B_HUMAN | 17 | 11.8 | 0.0131019 | 0.95179  | 0.999   | 0.0026  | 0.95179  | 0.99899 | 11      | 8.4  | NA      | NA      | NA      | NA      | NA      | NA     | NA     |   |
| 857 | Q02952 | AKAP12   | A-kinase anchor   | sp Q02952 AKA12_HUMA  | 29 | 26   | 0.2392011 | 0.39562  | 0.9984  | 0.4099  | 0.39562  | 0.99836 | 18      | 15.6 | NA      | NA      | NA      | NA      | NA      | NA     | NA     |   |
| 858 | Q02978 | SLC25A11 | Mitochondrial 2   | sp Q02978 M2OM_HUMA   | 3  | 12.7 | -0.273694 | 0.45901  | 0.9984  | 0.0254  | 0.45901  | 0.99836 | 2       | 10.2 | NA      | NA      | NA      | NA      | NA      | NA     | NA     |   |
| 859 | Q03252 | LMNB2    | Lamin-B2          | sp Q03252 LMNB2_HUMA  | 13 | 27.3 | -0.008133 | 0.97081  | 0.999   | 0.7395  | 0.97081  | 0.99899 | 14      | 21   | NA      | NA      | NA      | 0.65824 | NA      | NA     | NA     |   |
| 860 | Q03701 | CEBPZ    | CCAAT/enhance     | sp Q03701 CEBPZ_HUMAN | 6  | 6.8  | 0.1747354 | 0.64939  | 0.9991  | 0.7233  | 0.07708  | 0.22519 | 8       | 9.7  | 0.52584 | 0.31602 | 0.9973  | 1.04314 | 0.0162  | 0.0339 | 1      |   |

|     |        |         |                    |                        |    |      |           |         |        |         |         |         |    |      |         |         |        |         |        |        |    |
|-----|--------|---------|--------------------|------------------------|----|------|-----------|---------|--------|---------|---------|---------|----|------|---------|---------|--------|---------|--------|--------|----|
| 861 | Q04637 | EIF4G1  | Eukaryotic trans   | sp Q04637 EIF4G1_HUMAN | 24 | 18.1 | 0.0910313 | 0.57415 | 0.9991 | 0.1883  | 0.25241 | 0.44979 | 27 | 19.9 | -0.1471 | 0.36753 | 0.9973 | -1.1763 | #####  | #####  | 4  |
| 862 | Q04760 | GL01    | Lactoylglutathio   | sp Q04760 LGUL_HUMAN   | 2  | 20.1 | 0.2624325 | 0.54987 | 0.9984 | 0.0108  | 0.54987 | 0.99836 | 9  | 52.2 | NA      | NA      | NA     | NA      | NA     | NA     | NA |
| 863 | Q04837 | SSBP1   | Single-stranded    | sp Q04837 SSBP_HUMAN   | 5  | 43.9 | 0.2064509 | 0.47569 | 0.9984 | 1.0357  | 0.47569 | 0.99836 | 4  | 37.8 | NA      | NA      | NA     | NA      | NA     | NA     | NA |
| 864 | Q04917 | YWHAH   | 14-3-3 protein e   | sp Q04917 1433F_HUMAN  | 14 | 56.1 | 0.0011327 | 0.99492 | 0.9991 | -0.3735 | 0.04849 | 0.17027 | 15 | 60.2 | -0.1369 | 0.44571 | 0.9973 | -1.3294 | #####  | #####  | 4  |
| 865 | Q05086 | UBE3A   | Ubiquitin-protei   | sp Q05086 UBE3A_HUMAN  | 1  | 1.6  | NA        | NA      | NA     | NA      | NA      | NA      | 2  | 3.7  | 0.24062 | 0.42214 | 0.9991 | -2.2011 | 0.4221 | 0.9991 | NA |
| 866 | Q05519 | SRSF11  | Serine/arginine    | sp Q05519 SRS11_HUMAN  | 3  | 7.9  | 0.5833983 | NA      | NA     | NA      | NA      | NA      | 4  | 13.6 | 0.20936 | 0.77829 | 0.9991 | 1.667   | 0.7783 | 0.9991 | NA |
| 867 | Q05682 | CALD1   | Caldesmon          | sp Q05682 CALD1_HUMAN  | 12 | 20.6 | 0.0733744 | 0.81563 | 0.9984 | 0.2076  | 0.81563 | 0.99836 | 10 | 16   | NA      | NA      | NA     | 1.8144  | NA     | NA     | NA |
| 868 | Q06210 | GFPT1   | Glutamine-fruct    | sp Q06210 GFPT1_HUMAN  | 10 | 19   | 0.219781  | 0.33072 | 0.9991 | -0.3906 | 0.22594 | 0.41936 | 18 | 35.2 | 0.26155 | 0.25029 | 0.9973 | -0.5258 | 0.03   | 0.0561 | 3  |
| 869 | Q06265 | EXOSC9  | Exosome comple     | sp Q06265 EXOS9_HUMAN  | 2  | 4.8  | 0.2757244 | 0.168   | 0.9984 | 0.203   | 0.168   | 0.99836 | 2  | 5    | NA      | NA      | NA     | NA      | NA     | NA     | NA |
| 870 | Q06323 | PSME1   | Proteasome acti    | sp Q06323 PSME1_HUMA   | 4  | 18.1 | 0.1450276 | 0.54942 | 0.9991 | -0.444  | 0.11393 | 0.27928 | 16 | 68.3 | 0.01356 | 0.95511 | 0.9973 | -0.7617 | 0.0056 | 0.0137 | 4  |
| 871 | Q06830 | PRDX1   | Peroxisedoxin-1    | sp Q06830 PRDX1_HUMAN  | 13 | 60.3 | -0.109596 | 0.65446 | 0.9991 | -0.9529 | 0.00107 | 0.02437 | 15 | 74.4 | 0.20095 | 0.41526 | 0.9973 | 1.80077 | #####  | #####  | 2  |
| 872 | Q07020 | RPL18   | 60S ribosomal p    | sp Q07020 RL18_HUMAN   | 4  | 22.9 | 1.1359789 | 0.00301 | 0.899  | -0.0057 | 0.00301 | 0.89902 | 5  | 30.9 | NA      | NA      | NA     | NA      | NA     | NA     | NA |
| 873 | Q07021 | C1QBP   | Complement con     | sp Q07021 C1QBP_HUMAN  | 6  | 39.7 | -0.037337 | 0.89975 | 0.9984 | 0.0691  | 0.89975 | 0.99836 | 8  | 51.8 | NA      | NA      | NA     | NA      | NA     | NA     | NA |
| 874 | Q07065 | CKAP4   | Cytoskeleton-as    | sp Q07065 CKAP4_HUMAN  | 14 | 27.4 | -0.12222  | 0.71828 | 0.9991 | 0.7849  | 0.03117 | 0.12742 | 27 | 51.8 | -0.0446 | 0.89507 | 0.9973 | 1.42828 | 0.0005 | 0.0019 | 1  |
| 875 | Q07157 | TJP1    | Tight junction pr  | sp Q07157 ZO1_HUMAN    | 10 | 6.9  | 0.1756238 | 0.46417 | 0.9984 | 0.425   | 0.46417 | 0.99836 | 2  | 1.6  | 0.33909 | NA      | NA     | NA      | NA     | NA     | NA |
| 876 | Q07666 | KHDRBS1 | KH domain-conta    | sp Q07666 KHDR1_HUMA   | 9  | 26.2 | 0.0661784 | 0.81757 | 0.9991 | 0.5407  | 0.07309 | 0.21774 | 8  | 17.2 | 0.47008 | 0.11492 | 0.9973 | -0.058  | 0.8398 | 0.8667 | NA |
| 877 | Q07866 | KLC1    | Kinesin light cha  | sp Q07866 KLC1_HUMAN   | 6  | 12.6 | NA        | NA      | NA     | NA      | NA      | NA      | 22 | 43.3 | 0.11005 | 0.82533 | 0.9991 | 4.56383 | 0.8253 | 0.9991 | NA |
| 878 | Q07955 | SRSF1   | Serine/arginine    | sp Q07955 SRSF1_HUMAN  | 8  | 31.5 | -0.093461 | 0.7973  | 0.9991 | 0.7765  | 0.04513 | 0.16324 | 12 | 47.2 | 0.4689  | 0.20836 | 0.9973 | 1.88075 | #####  | 0.0004 | 1  |
| 879 | Q07960 | ARHGAP1 | Rho GTPase-acti    | sp Q07960 RHG01_HUMA   | 6  | 16.9 | 0.3906131 | 0.26225 | 0.9984 | 0.2131  | 0.26225 | 0.99836 | 4  | 10.3 | 0.39437 | NA      | NA     | NA      | NA     | NA     | NA |
| 880 | Q08211 | DHX9    | ATP-dependent      | sp Q08211 DHX9_HUMAN   | 30 | 31.5 | -0.124185 | 0.63079 | 0.9991 | 0.1668  | 0.51989 | 0.6877  | 34 | 36.4 | 0.52875 | 0.05304 | 0.9973 | 2.05441 | #####  | #####  | 1  |
| 881 | Q08257 | CRYZ    | Quinone oxidore    | sp Q08257 QOR_HUMAN    | 3  | 12.2 | 0.1591592 | 0.49248 | 0.9984 | 0.1447  | 0.49248 | 0.99836 | 4  | 18.8 | NA      | NA      | NA     | NA      | NA     | NA     | NA |
| 882 | Q08431 | MFGE8   | Lactadherin        | sp Q08431 MFGM_HUMA    | 3  | 9.6  | NA        | NA      | NA     | -0.8714 | NA      | NA      | NA | NA   | NA      | NA      | NA     | NA      | NA     | NA     | NA |
| 883 | Q08752 | PPID    | Peptidyl-prolyl c  | sp Q08752 PPID_HUMAN   | 9  | 29.2 | 0.0327766 | 0.88563 | 0.9991 | -0.9146 | 0.01165 | 0.07028 | 10 | 32.7 | -0.2041 | 0.37687 | 0.9973 | -0.6075 | 0.0165 | 0.0343 | 3  |
| 884 | Q08945 | SSRP1   | FACT complex su    | sp Q08945 SSRP1_HUMAN  | 10 | 18.5 | -0.107509 | 0.57449 | 0.9991 | 0.1614  | 0.40221 | 0.60515 | 11 | 20.7 | 0.0687  | 0.71898 | 0.9973 | 0.31532 | 0.1119 | 0.1728 | NA |
| 885 | Q08J23 | NSUN2   | tRNA (cytosine)3   | sp Q08J23 NSUN2_HUMA   | 7  | 12.3 | -0.014928 | 0.95836 | 0.9991 | -0.2283 | 0.47025 | 0.64919 | 10 | 15.4 | -0.1758 | 0.49539 | 0.9973 | 0.10995 | 0.6683 | 0.7443 | NA |
| 886 | Q09028 | RBBP4   | Histone-binding    | sp Q09028 RBBP4_HUMAN  | 11 | 26.8 | 0.3805896 | 0.09519 | 0.9991 | 0.3191  | 0.15662 | 0.33049 | 17 | 69.4 | 0.05346 | 0.80662 | 0.9973 | -0.0704 | 0.7474 | 0.8004 | NA |
| 887 | Q09161 | NCBP1   | Nuclear cap-bind   | sp Q09161 NCBP1_HUMAN  | 2  | 2.7  | -0.144851 | 0.38638 | 0.9984 | 0.0581  | 0.38638 | 0.99836 | 4  | 5.1  | NA      | NA      | NA     | NA      | NA     | NA     | NA |
| 888 | Q0VF96 | CGNL1   | Cingulin-like pro  | sp Q0VF96 CGNL1_HUMA   | 5  | 5.1  | 0.2449277 | 0.50549 | 0.9984 | 0.6828  | 0.50549 | 0.99836 | NA | NA   | NA      | NA      | NA     | NA      | NA     | NA     | NA |
| 889 | Q10570 | CPSF1   | Cleavage and po    | sp Q10570 CPSF1_HUMAN  | 3  | 2.6  | -0.091942 | 0.65917 | 0.9984 | 0.5107  | 0.65917 | 0.99836 | 4  | 3.5  | 0.72745 | NA      | NA     | NA      | NA     | NA     | NA |
| 890 | Q43896 | KIF1C   | Kinesin-like prot  | sp Q43896 KIF1C_HUMAN  | 1  | 1    | NA        | NA      | NA     | NA      | NA      | NA      | 1  | 1.2  | NA      | NA      | NA     | NA      | NA     | NA     | NA |
| 891 | Q12788 | TBL3    | Transducin beta    | sp Q12788 TBL3_HUMAN   | 4  | 6.7  | 0.2000647 | 0.54499 | 0.9984 | -0.0408 | 0.54499 | 0.99836 | 9  | 18.3 | -0.004  | NA      | NA     | NA      | NA     | NA     | NA |
| 892 | Q12824 | SMARCB1 | SWI/SNF-related    | sp Q12824 SNF5_HUMAN   | 3  | 11.4 | -0.016547 | 0.92664 | 0.999  | 0.6079  | 0.92664 | 0.99899 | 2  | 8.1  | NA      | NA      | NA     | NA      | NA     | NA     | NA |
| 893 | Q12849 | GRSF1   | G-rich sequence    | sp Q12849 GRSF1_HUMAN  | 8  | 27.9 | -0.179537 | 0.3539  | 0.9984 | 0.2776  | 0.3539  | 0.99836 | 7  | 26.5 | NA      | NA      | NA     | NA      | NA     | NA     | NA |
| 894 | Q12874 | SF3A3   | Splicing factor 3  | sp Q12874 SF3A3_HUMAN  | 7  | 19.6 | -0.303359 | 0.26776 | 0.9991 | -0.1263 | 0.67434 | 0.81173 | 15 | 36.9 | -0.2913 | 0.28642 | 0.9973 | -0.2036 | 0.4519 | 0.5449 | NA |
| 895 | Q12888 | TP53BP1 | TP53-binding pro   | sp Q12888 TP53B_HUMAN  | 15 | 10.7 | 0.3619341 | 0.22839 | 0.9991 | 0.8442  | 0.01168 | 0.07028 | 19 | 14.2 | -0.7461 | 0.15658 | 0.9973 | 0.4348  | 0.3022 | 0.3875 | 1  |
| 896 | Q12904 | AIMP1   | Aminoacyl tRNA     | sp Q12904 AIMP1_HUMA   | 6  | 26.6 | 0.0044577 | NA      | NA     | NA      | NA      | NA      | 7  | 35.6 | -0.0891 | 0.68234 | 0.9991 | 0.03922 | 0.6823 | 0.9991 | NA |
| 897 | Q12905 | ILF2    | Interleukin enha   | sp Q12905 ILF2_HUMAN   | 15 | 56.2 | 0.0685505 | 0.81158 | 0.9991 | 0.2611  | 0.36946 | 0.57825 | 13 | 51.3 | -0.007  | 0.98056 | 0.9973 | 1.28773 | 0.0003 | 0.0012 | 1  |
| 898 | Q12906 | ILF3    | Interleukin enha   | sp Q12906 ILF3_HUMAN   | 33 | 45   | -0.047772 | 0.78515 | 0.9991 | 0.192   | 0.28153 | 0.48213 | 26 | 35.1 | 0.09713 | 0.58078 | 0.9973 | 1.88406 | #####  | #####  | 1  |
| 899 | Q12907 | LMAN2   | Vesicular integr   | sp Q12907 LMAN2_HUMA   | 2  | 5.6  | -0.557981 | NA      | NA     | NA      | NA      | NA      | 11 | 39.3 | NA      | NA      | NA     | NA      | NA     | NA     | NA |
| 900 | Q12931 | TRAP1   | Heat shock prot    | sp Q12931 TRAP1_HUMAN  | 10 | 18.3 | 0.2795567 | 0.41184 | 0.9991 | 0.2572  | 0.44947 | 0.63607 | 21 | 36.5 | -0.0868 | 0.79695 | 0.9973 | 2.19671 | #####  | #####  | 1  |
| 901 | Q12996 | CSTF3   | Cleavage stimul    | sp Q12996 CSTF3_HUMAN  | 5  | 8.2  | 0.0312475 | 0.87041 | 0.9984 | 0.1483  | 0.87041 | 0.99836 | 7  | 12.3 | NA      | NA      | NA     | NA      | NA     | NA     | NA |
| 902 | Q13011 | ECH1    | Delta(3,5)-Delta   | sp Q13011 ECH1_HUMAN   | 6  | 25.3 | -0.132423 | 0.60021 | 0.9984 | -0.0671 | 0.60021 | 0.99836 | 7  | 26.5 | NA      | NA      | NA     | NA      | NA     | NA     | NA |
| 903 | Q13042 | CDC16   | Cell division cycl | sp Q13042 CDC16_HUMAN  | 2  | 4.4  | -0.351262 | NA      | NA     | NA      | NA      | NA      | 2  | 3.9  | -0.0197 | NA      | NA     | NA      | NA     | NA     | NA |
| 904 | Q13045 | FLII    | Protein flightles  | sp Q13045 FLII_HUMAN   | 4  | 4    | NA        | NA      | NA     | NA      | NA      | NA      | 4  | 3.8  | 0.26321 | NA      | NA     | NA      | NA     | NA     | NA |
| 905 | Q13123 | IK      | Protein Red        | sp Q13123 RED_HUMAN    | 6  | 12.2 | -0.19486  | 0.38769 | 0.9991 | 0.811   | 0.01978 | 0.09821 | 7  | 13.5 | -0.396  | 0.09123 | 0.9973 | -0.6661 | 0.0085 | 0.0191 | 5  |
| 906 | Q13126 | MTAP    | S-methyl-5-thioa   | sp Q13126 MTAP_HUMAN   | 5  | 21.6 | NA        | NA      | NA     | NA      | NA      | NA      | 9  | 38.2 | -0.1289 | 0.62576 | 0.9991 | -0.8417 | 0.6258 | 0.9991 | NA |
| 907 | Q13148 | TARDBP  | TAR DNA-bindin     | sp Q13148 TADBP_HUMA   | 8  | 18.1 | -0.065114 | 0.77517 | 0.9991 | 0.593   | 0.01743 | 0.09153 | 7  | 18.4 | 0.01504 | 0.94732 | 0.9973 | -1.4071 | #####  | #####  | 5  |
| 908 | Q13151 | HNRNPA0 | Heterogeneous      | sp Q13151 ROAO_HUMAN   | 5  | 15.7 | 0.5177723 | 0.12087 | 0.9984 | 0.7243  | 0.12087 | 0.99836 | 7  | 36.1 | NA      | NA      | NA     | NA      | NA     | NA     | NA |

|     |        |         |                   |                       |    |      |           |         |        |         |         |         |    |      |         |         |        |         |        |        |    |
|-----|--------|---------|-------------------|-----------------------|----|------|-----------|---------|--------|---------|---------|---------|----|------|---------|---------|--------|---------|--------|--------|----|
| 909 | Q13153 | PAK1    | Serine/threonine  | sp Q13153 PAK1_HUMAN  | 8  | 18   | 0.1392688 | NA      | NA     | NA      | NA      | NA      | 6  | 15.6 | NA      | NA      | NA     | NA      | NA     | NA     | NA |
| 910 | Q13162 | PRDX4   | Peroxiredoxin-4   | sp Q13162 PRDX4_HUMAN | 8  | 33.6 | -0.023437 | 0.95186 | 0.9991 | 0.0397  | 0.91859 | 0.95217 | 13 | 52.8 | -0.2147 | 0.58206 | 0.9973 | 1.75742 | 0.0003 | 0.0011 | 1  |
| 911 | Q13177 | PAK2    | Serine/threonine  | sp Q13177 PAK2_HUMAN  | 10 | 26.3 | -0.107827 | NA      | NA     | NA      | NA      | NA      | 16 | 39.5 | 0.09095 | 0.65742 | 0.9991 | 0.78389 | 0.6574 | 0.9991 | NA |
| 912 | Q13185 | CBX3    | Chromobox prot    | sp Q13185 CBX3_HUMAN  | 9  | 48.6 | 0.1789043 | 0.5353  | 0.9991 | -0.1136 | 0.69273 | 0.82824 | 9  | 48.6 | 0.12456 | 0.66503 | 0.9973 | -0.2282 | 0.4308 | 0.524  | NA |
| 913 | Q13188 | STK3    | Serine/threonine  | sp Q13188 STK3_HUMAN  | 2  | 8.4  | 1.1521147 | NA      | NA     | NA      | NA      | NA      | NA | NA   | NA      | NA      | NA     | NA      | NA     | NA     | NA |
| 914 | Q13200 | PSMD2   | 26S proteasome    | sp Q13200 PSMD2_HUMA  | 19 | 22.2 | 0.0072026 | 0.9722  | 0.9991 | 0.4306  | 0.05001 | 0.17466 | 25 | 33   | -0.2795 | 0.18809 | 0.9973 | 0.04613 | 0.8235 | 0.8548 | NA |
| 915 | Q13242 | SRSF9   | Serine/arginine   | sp Q13242 SRSF9_HUMAN | 5  | 24.9 | -0.069844 | 0.80363 | 0.9984 | 0.4864  | 0.80363 | 0.99836 | 9  | 46.6 | NA      | NA      | NA     | NA      | NA     | NA     | NA |
| 916 | Q13247 | SRSF9   | Serine/arginine   | sp Q13247 SRSF6_HUMAN | 7  | 14.5 | -0.127659 | 0.7319  | 0.9991 | 0.4615  | 0.22539 | 0.41936 | 6  | 15.4 | -0.0384 | 0.91782 | 0.9973 | 1.70861 | 0.0002 | 0.001  | 1  |
| 917 | Q13263 | TRIM28  | Transcription int | sp Q13263 TIF1B_HUMAN | 28 | 50.5 | -0.106005 | 0.55094 | 0.9991 | 0.1502  | 0.40059 | 0.60515 | 21 | 40.8 | -0.3267 | 0.07855 | 0.9973 | -0.8839 | 0.0001 | 0.0005 | 4  |
| 918 | Q13283 | G3BP1   | Ras GTPase-activ  | sp Q13283 G3BP1_HUMAN | 11 | 30.3 | 0.1517213 | 0.54425 | 0.9991 | 0.149   | 0.55142 | 0.71084 | 13 | 36.7 | -0.202  | 0.42152 | 0.9973 | 1.01884 | 0.0007 | 0.0024 | 1  |
| 919 | Q13310 | PABPC4  | Polyadenylate-b   | sp Q13310 PABP4_HUMAN | 14 | 24.7 | 0.1676896 | 0.52317 | 0.9991 | 0.1465  | 0.57631 | 0.73358 | 17 | 31.8 | 0.05838 | 0.82313 | 0.9973 | 0.3642  | 0.1752 | 0.2551 | NA |
| 920 | Q13330 | MTA1    | Metastasis-asso   | sp Q13330 MTA1_HUMAN  | 3  | 5.2  | 0.5105294 | NA      | NA     | NA      | NA      | NA      | 6  | 11.2 | NA      | NA      | NA     | NA      | NA     | NA     | NA |
| 921 | Q13347 | EIF3I   | Eukaryotic trans  | sp Q13347 EIF3I_HUMAN | 6  | 23.1 | -0.162894 | 0.51917 | 0.9991 | -0.6041 | 0.02624 | 0.11746 | 13 | 50.5 | -0.0092 | 0.97072 | 0.9973 | -0.3958 | 0.1286 | 0.194  | 3  |
| 922 | Q13404 | UBE2V1  | Ubiquitin-conjug  | sp Q13404 UBE2V1_HUMA | 5  | 44.2 | 0.0439752 | 0.88119 | 0.9984 | -0.9865 | 0.88119 | 0.99836 | 6  | 46.9 | NA      | NA      | NA     | NA      | NA     | NA     | NA |
| 923 | Q13405 | MRPL49  | 39S ribosomal p   | sp Q13405 RM49_HUMAN  | 3  | 23.5 | 1.4964326 | NA      | NA     | NA      | NA      | NA      | 3  | 23.5 | NA      | NA      | NA     | NA      | NA     | NA     | NA |
| 924 | Q13409 | DYNC1I2 | Cytoplasmic dyn   | sp Q13409 DC1I2_HUMAN | 5  | 11.8 | 0.4167876 | 0.0893  | 0.9984 | 0.3072  | 0.0893  | 0.99836 | 7  | 18   | NA      | NA      | NA     | NA      | NA     | NA     | NA |
| 925 | Q13428 | TCOF1   | Treacle protein   | sp Q13428 TCOF_HUMAN  | 11 | 10.1 | 0.4657567 | 0.1471  | 0.9984 | 0.6228  | 0.1471  | 0.99836 | 16 | 13.8 | NA      | NA      | NA     | NA      | NA     | NA     | NA |
| 926 | Q13435 | SF3B2   | Splicing factor 3 | sp Q13435 SF3B2_HUMAN | 12 | 19.1 | 0.1938218 | 0.66843 | 0.9991 | 0.4772  | 0.2985  | 0.49915 | 25 | 34.6 | 0.44789 | 0.3282  | 0.9973 | 1.91635 | 0.0005 | 0.0018 | 1  |
| 927 | Q13442 | PDAP1   | 28 kDa heat-sho   | sp Q13442 HAP28_HUMA  | 6  | 29.8 | 0.199307  | 0.38445 | 0.9991 | -0.1873 | 0.4631  | 0.64633 | 6  | 29.8 | 0.37302 | 0.11405 | 0.9973 | 1.58157 | #####  | #####  | 2  |
| 928 | Q13451 | FKBP5   | Peptidyl-prolyl c | sp Q13451 FKBP5_HUMAN | 6  | 17.1 | 0.4217714 | 0.33563 | 0.9984 | 1.9375  | 0.33563 | 0.99836 | 6  | 18.4 | NA      | NA      | NA     | NA      | NA     | NA     | NA |
| 929 | Q13509 | TUBB3   | Tubulin beta-3 c  | sp Q13509 TBB3_HUMAN  | 11 | 28.4 | 0.3638608 | 0.34649 | 0.9984 | -0.8424 | 0.34649 | 0.99836 | 20 | 60.4 | NA      | NA      | NA     | NA      | NA     | NA     | NA |
| 930 | Q13526 | PIN1    | Peptidyl-prolyl c | sp Q13526 PIN1_HUMAN  | 1  | 6.1  | NA        | NA      | NA     | NA      | NA      | NA      | 5  | 39.3 | #####   | 0.99993 | 0.9999 | 0.75766 | 0.9999 | 0.9999 | NA |
| 931 | Q13547 | HDAC1   | Histone deacetyl  | sp Q13547 HDAC1_HUMA  | 5  | 9.5  | NA        | NA      | NA     | NA      | NA      | NA      | 7  | 17   | 0.27187 | NA      | NA     | NA      | NA     | NA     | NA |
| 932 | Q13561 | DCTN2   | Dynactin subuni   | sp Q13561 DCTN2_HUMA  | 6  | 22.2 | 0.6321923 | 0.07653 | 0.9991 | 0.4427  | 0.36031 | 0.56518 | 15 | 45.9 | 0.24004 | 0.48033 | 0.9973 | 0.56407 | 0.1101 | 0.1709 | NA |
| 933 | Q13564 | NAE1    | NEDD8-activator   | sp Q13564 ULA1_HUMAN  | 5  | 12.9 | -0.29101  | 0.44275 | 0.9984 | -0.1097 | 0.44275 | 0.99836 | 6  | 16.3 | NA      | NA      | NA     | NA      | NA     | NA     | NA |
| 934 | Q13576 | IQGAP2  | Ras GTPase-activ  | sp Q13576 IQGA2_HUMAN | 6  | 4.4  | NA        | NA      | NA     | NA      | NA      | NA      | 4  | 2.4  | 0.59196 | NA      | NA     | NA      | NA     | NA     | NA |
| 935 | Q13596 | SNX1    | Sorting nexin-1   | sp Q13596 SNX1_HUMAN  | 3  | 6.1  | NA        | NA      | NA     | NA      | NA      | NA      | 10 | 22.2 | 0.01237 | 0.9714  | 0.9991 | -0.1231 | 0.9714 | 0.9991 | NA |
| 936 | Q13601 | KRR1    | KRR1 small subu   | sp Q13601 KRR1_HUMAN  | 2  | 7.3  | 0.2779487 | 0.60926 | 0.9984 | 0.2857  | 0.60926 | 0.99836 | 3  | 9.7  | NA      | NA      | NA     | NA      | NA     | NA     | NA |
| 937 | Q13616 | CUL1    | Cullin-1          | sp Q13616 CUL1_HUMAN  | 2  | 3.6  | NA        | NA      | NA     | NA      | NA      | NA      | 5  | 10.4 | -0.0543 | NA      | NA     | NA      | NA     | NA     | NA |
| 938 | Q13813 | SPTAN1  | Spectrin alpha c  | sp Q13813 SPTN1_HUMAN | 54 | 27.5 | -0.09847  | 0.66926 | 0.9991 | -0.1956 | 0.40011 | 0.60515 | 97 | 47.5 | -0.149  | 0.51949 | 0.9973 | 0.25418 | 0.2777 | 0.3633 | NA |
| 939 | Q13838 | DDX39B  | Spliceosome RNA   | sp Q13838 DX39B_HUMAN | 11 | 33.6 | 0.0007171 | 0.99726 | 0.9991 | -0.1804 | 0.39285 | 0.60102 | 11 | 29   | 0.2445  | 0.25123 | 0.9973 | -0.4885 | 0.03   | 0.0561 | 4  |
| 940 | Q13907 | IDI1    | Isopentenyl-diph  | sp Q13907 IDI1_HUMAN  | 4  | 22.9 | 0.4133857 | NA      | NA     | NA      | NA      | NA      | 3  | 18.5 | NA      | NA      | NA     | NA      | NA     | NA     | NA |
| 941 | Q14008 | CKAP5   | Cytoskeleton-as   | sp Q14008 CKAP5_HUMAN | 14 | 7.7  | -0.04768  | 0.87928 | 0.9991 | -0.1722 | 0.625   | 0.77546 | 20 | 11.7 | 0.28337 | 0.3729  | 0.9973 | 0.59088 | 0.0745 | 0.1251 | NA |
| 942 | Q14019 | COTL1   | Coactosin-like p  | sp Q14019 COTL1_HUMAN | 3  | 19   | 0.0694378 | 0.81491 | 0.9984 | -0.3992 | 0.81491 | 0.99836 | 3  | 30.3 | NA      | NA      | NA     | NA      | NA     | NA     | NA |
| 943 | Q14103 | HNRNPD  | Heterogeneous     | sp Q14103 HNRPD_HUMA  | 11 | 29.9 | -0.078784 | 0.76268 | 0.9991 | -0.2762 | 0.29729 | 0.4984  | 16 | 36.3 | 0.14823 | 0.57133 | 0.9973 | 1.94437 | #####  | #####  | 2  |
| 944 | Q14126 | DSG2    | Desmoglein-2      | sp Q14126 DSG2_HUMAN  | 8  | 11.2 | -0.261114 | 0.35476 | 0.9984 | 0.6343  | 0.35476 | 0.99836 | NA | NA   | NA      | NA      | NA     | NA      | NA     | NA     | NA |
| 945 | Q14151 | SAFB2   | Scaffold attachm  | sp Q14151 SAFB2_HUMAN | 10 | 16.8 | -0.072456 | 0.77612 | 0.9984 | 0.7329  | 0.77612 | 0.99836 | 11 | 16.5 | NA      | NA      | NA     | NA      | NA     | NA     | NA |
| 946 | Q14152 | EIF3A   | Eukaryotic trans  | sp Q14152 EIF3A_HUMAN | 19 | 16.6 | 0.439351  | 0.15025 | 0.9991 | -0.738  | 0.02177 | 0.10155 | 32 | 23.4 | 0.01431 | 0.96139 | 0.9973 | -0.9348 | 0.0053 | 0.0131 | 3  |
| 947 | Q14157 | UBAP2L  | Ubiquitin-associ  | sp Q14157 UBP2L_HUMAN | 11 | 15.8 | 0.182275  | 0.6662  | 0.9991 | -0.1553 | 0.71296 | 0.84477 | 15 | 24.4 | 0.48329 | 0.31309 | 0.9973 | 3.5279  | #####  | #####  | 1  |
| 948 | Q14165 | MLEC    | Malectin          | sp Q14165 MLEC_HUMAN  | 8  | 32.2 | -0.23514  | 0.33335 | 0.9991 | 0.6048  | 0.02055 | 0.09992 | 5  | 21.9 | 0.06917 | 0.77303 | 0.9973 | -0.7025 | 0.0087 | 0.0194 | 5  |
| 949 | Q14166 | TTL12   | Tubulin-tyrosine  | sp Q14166 TTL12_HUMAN | 7  | 13.8 | 0.3728489 | 0.386   | 0.9991 | -0.0897 | 0.85028 | 0.91851 | 15 | 33.4 | 0.83994 | 0.06232 | 0.9973 | -0.1424 | 0.7379 | 0.7927 | NA |
| 950 | Q14194 | CRMP1   | Dihydropyrimidi   | sp Q14194 DPYL1_HUMAN | 11 | 28.1 | 0.1507691 | 0.51375 | 0.9984 | -0.6232 | 0.51375 | 0.99836 | 9  | 20.3 | NA      | NA      | NA     | 0.53052 | NA     | NA     | NA |
| 951 | Q14195 | DPYSL3  | Dihydropyrimidi   | sp Q14195 DPYL3_HUMAN | 24 | 63   | 0.1837758 | 0.57142 | 0.9984 | -0.9973 | 0.57142 | 0.99836 | 18 | 47.5 | NA      | NA      | NA     | NA      | NA     | NA     | NA |
| 952 | Q14203 | DCTN1   | Dynactin subuni   | sp Q14203 DCTN1_HUMA  | 5  | 5.5  | NA        | NA      | NA     | NA      | NA      | NA      | 17 | 17.3 | -0.0801 | NA      | NA     | NA      | NA     | NA     | NA |
| 953 | Q14204 | DYNC1H1 | Cytoplasmic dyn   | sp Q14204 DYHC1_HUMA  | 47 | 13.9 | -0.157343 | 0.69665 | 0.9991 | -1.3382 | 0.00376 | 0.03699 | 93 | 25.8 | 0.00058 | 0.99885 | 0.9997 | 2.67447 | #####  | #####  | 2  |
| 954 | Q14240 | EIF4A2  | Eukaryotic initia | sp Q14240 IF4A2_HUMAN | 13 | 31.4 | 0.4764216 | NA      | NA     | NA      | NA      | NA      | 12 | 31.7 | NA      | NA      | NA     | NA      | NA     | NA     | NA |
| 955 | Q14247 | CTTN    | Src substrate co  | sp Q14247 SRC8_HUMAN  | 10 | 27.6 | -0.003551 | 0.99018 | 0.9991 | 0.3371  | 0.25249 | 0.44979 | 20 | 44.5 | -0.3113 | 0.28929 | 0.9973 | 0.89346 | 0.0061 | 0.0147 | 1  |
| 956 | Q14254 | FLOT2   | Flotillin-2       | sp Q14254 FLOT2_HUMAN | 6  | 16.1 | -0.626563 | 0.09252 | 0.9991 | -0.1565 | 0.75285 | 0.86792 | 6  | 15.2 | 0.22975 | 0.51605 | 0.9973 | -1.4449 | 0.0113 | 0.0245 | 4  |

|      |        |         |                         |                       |    |      |           |         |        |         |         |         |    |      |         |         |        |         |         |        |    |
|------|--------|---------|-------------------------|-----------------------|----|------|-----------|---------|--------|---------|---------|---------|----|------|---------|---------|--------|---------|---------|--------|----|
| 957  | Q14257 | RCN2    | Reticulocalbin-2        | sp Q14257 RCN2_HUMAN  | 9  | 36.6 | -0.121049 | 0.55281 | 0.9984 | 0.3241  | 0.55281 | 0.99836 | 10 | 46.4 | NA      | NA      | NA     | NA      | NA      | NA     | NA |
| 958  | Q14318 | FKBP8   | Peptidyl-prolyl cyclase | sp Q14318 FKBP8_HUMAN | 5  | 17.2 | 0.2596829 | 0.50824 | 0.9984 | 0.1896  | 0.50824 | 0.99836 | 2  | 7.8  | NA      | NA      | NA     | NA      | NA      | NA     | NA |
| 959  | Q14320 | FAM50A  | Protein FAM50A          | sp Q14320 FA50A_HUMAN | 1  | 2.4  | NA        | NA      | NA     | NA      | NA      | NA      | 6  | 23   | 0.44304 | 0.1787  | 0.9991 | 0.59333 | 0.1787  | 0.9991 | NA |
| 960  | Q14444 | CAPRIN1 | Caprin-1                | sp Q14444 CAPR1_HUMAN | 12 | 23   | -0.04543  | 0.85785 | 0.9991 | 0.333   | 0.20058 | 0.38435 | 12 | 19.9 | -0.1281 | 0.61473 | 0.9973 | 1.60914 | #####   | #####  | 1  |
| 961  | Q14498 | RBM39   | RNA-binding protein     | sp Q14498 RBM39_HUMAN | 5  | 12.1 | -0.067702 | 0.82431 | 0.9991 | 0.4695  | 0.13772 | 0.30325 | 10 | 24.9 | 0.15805 | 0.56416 | 0.9973 | 0.16192 | 0.5548  | 0.6459 | NA |
| 962  | Q14534 | SQLE    | Squalene monooxygenase  | sp Q14534 ERG1_HUMAN  | 3  | 8.7  | -0.256881 | 0.42736 | 0.9984 | 0.8294  | 0.42736 | 0.99836 | NA | NA   | NA      | NA      | NA     | NA      | NA      | NA     | NA |
| 963  | Q14566 | MCM6    | DNA replication         | sp Q14566 MCM6_HUMAN  | 18 | 29.4 | 0.0055739 | 0.979   | 0.9991 | 0.2853  | 0.18981 | 0.37279 | 17 | 24.8 | 0.0259  | 0.9027  | 0.9973 | 0.29309 | 0.1786  | 0.2595 | NA |
| 964  | Q14671 | PUM1    | Pumilio homolog         | sp Q14671 PUM1_HUMAN  | 4  | 3.9  | -0.117559 | NA      | NA     | NA      | NA      | NA      | 4  | 5.1  | 0.06182 | NA      | NA     | NA      | NA      | NA     | NA |
| 965  | Q14677 | CLINT1  | Clathrin interact       | sp Q14677 EPN4_HUMAN  | 9  | 20   | -0.001344 | 0.99636 | 0.9991 | 0.0382  | 0.89681 | 0.93506 | 8  | 17   | -0.119  | 0.68655 | 0.9973 | 0.33594 | 0.2629  | 0.3465 | NA |
| 966  | Q14683 | SMC1A   | Structural maint        | sp Q14683 SMC1A_HUMAN | 21 | 17.7 | 0.0437894 | 0.87133 | 0.9991 | 0.4306  | 0.12484 | 0.2883  | 16 | 13.4 | -0.0036 | 0.98944 | 0.9973 | -0.0969 | 0.7205  | 0.7823 | NA |
| 967  | Q14684 | RRP1B   | Ribosomal RNA           | sp Q14684 RRP1B_HUMAN | 7  | 9.9  | 0.0776669 | 0.71362 | 0.9984 | -0.2126 | 0.71362 | 0.99836 | 8  | 12.5 | NA      | NA      | NA     | NA      | NA      | NA     | NA |
| 968  | Q14690 | PDCD11  | Protein RRP5 ho         | sp Q14690 RRP5_HUMAN  | 18 | 11.2 | 0.3171799 | 0.17179 | 0.9984 | 0.4636  | 0.17179 | 0.99836 | 8  | 4.8  | NA      | NA      | NA     | NA      | NA      | NA     | NA |
| 969  | Q14692 | BMS1    | Ribosome biogen         | sp Q14692 BMS1_HUMAN  | 4  | 4.4  | -0.309282 | 0.49201 | 0.9984 | -0.3803 | 0.49201 | 0.99836 | 2  | 2.2  | NA      | NA      | NA     | NA      | NA      | NA     | NA |
| 970  | Q14694 | USP10   | Ubiquitin carbox        | sp Q14694 UBP10_HUMAN | 3  | 4.9  | -0.302778 | 0.29629 | 0.9984 | -0.487  | 0.29629 | 0.99836 | 7  | 13   | NA      | NA      | NA     | NA      | NA      | NA     | NA |
| 971  | Q14696 | MESD    | LRP chaperone N         | sp Q14696 MESD_HUMAN  | 5  | 25.6 | -0.32963  | 0.29691 | 0.9984 | -0.4879 | 0.29691 | 0.99836 | 3  | 14.5 | NA      | NA      | NA     | NA      | NA      | NA     | NA |
| 972  | Q14697 | GANAB   | Neutral alpha-gl        | sp Q14697 GANAB_HUMAN | 8  | 13   | -0.154473 | 0.63691 | 0.9991 | 0.7547  | 0.05222 | 0.17799 | 17 | 23.1 | -0.2234 | 0.49653 | 0.9973 | 1.38359 | 0.0006  | 0.002  | 1  |
| 973  | Q14739 | LBR     | Delta(14)-sterol        | sp Q14739 LBR_HUMAN   | 5  | 7.3  | -0.341589 | 0.14151 | 0.9984 | 0.4408  | 0.14151 | 0.99836 | 2  | 3.1  | NA      | NA      | NA     | NA      | NA      | NA     | NA |
| 974  | Q14839 | CHD4    | Chromodomain-f          | sp Q14839 CHD4_HUMAN  | 17 | 11.4 | 0.0177576 | 0.96415 | 0.9991 | 0.6906  | 0.09455 | 0.25391 | 21 | 13.8 | 0.27307 | 0.4927  | 0.9973 | -0.3255 | 0.415   | 0.5082 | NA |
| 975  | Q14847 | LASP1   | LIM and SH3 dom         | sp Q14847 LASP1_HUMAN | 8  | 32.2 | 0.2254465 | 0.70308 | 0.9991 | -0.4768 | 0.42381 | 0.61448 | 7  | 29.9 | -0.0636 | 0.91416 | 0.9973 | -1.4131 | 0.0269  | 0.0509 | 4  |
| 976  | Q14914 | PTGR1   | Prostaglandin re        | sp Q14914 PTGR1_HUMAN | 7  | 26.7 | 0.4531984 | 0.04262 | 0.9984 | 0.3568  | 0.04262 | 0.99836 | 1  | 7    | NA      | NA      | NA     | NA      | NA      | NA     | NA |
| 977  | Q14974 | KPNB1   | Importin subunit        | sp Q14974 IMB1_HUMAN  | 8  | 14.7 | -0.248329 | 0.39168 | 0.9991 | -0.5874 | 0.05345 | 0.18047 | 23 | 38.6 | -0.1485 | 0.60576 | 0.9973 | -0.3921 | 0.1833  | 0.2642 | NA |
| 978  | Q14978 | NOLC1   | Nucleolar and co        | sp Q14978 NOLC1_HUMAN | 5  | 6.3  | -0.314258 | 0.54481 | 0.9991 | -0.0536 | 0.91731 | 0.95217 | 12 | 16.7 | -1.021  | 0.03955 | 0.9973 | 3.92872 | #####   | #####  | 1  |
| 979  | Q14980 | NUMA1   | Nuclear mitotic         | sp Q14980 NUMA1_HUMAN | 14 | 8    | -0.023764 | 0.93547 | 0.9991 | 0.1574  | 0.63291 | 0.77639 | 40 | 24.3 | 0.99616 | 0.02903 | 0.9973 | 2.96514 | #####   | #####  | 1  |
| 980  | Q14C86 | GAPVD1  | GTPase-activati         | sp Q14C86 GAPD1_HUMAN | 1  | 0.8  | NA        | NA      | NA     | NA      | NA      | NA      | 5  | 3.9  | -0.0299 | 0.91749 | 0.9991 | -0.1911 | 0.9175  | 0.9991 | NA |
| 981  | Q15003 | NCAPH   | Condensin comp          | sp Q15003 CND2_HUMAN  | 6  | 9.9  | -0.125225 | 0.6219  | 0.9984 | 0.6543  | 0.6219  | 0.99836 | 4  | 6.2  | NA      | NA      | NA     | NA      | NA      | NA     | NA |
| 982  | Q15005 | SPCS2   | Signal peptidase        | sp Q15005 SPCS2_HUMAN | 4  | 23.9 | 0.1429662 | 0.72925 | 0.9984 | 1.2624  | 0.72925 | 0.99836 | 2  | 12.4 | NA      | NA      | NA     | NA      | NA      | NA     | NA |
| 983  | Q15019 | Sep-02  | Septin-2                | sp Q15019 SEPT2_HUMAN | 7  | 20.2 | 0.1179827 | 0.68514 | 0.9991 | -0.5047 | 0.09611 | 0.25715 | 12 | 47.1 | -0.302  | 0.30614 | 0.9973 | 2.04035 | #####   | #####  | 2  |
| 984  | Q15020 | SART3   | Squamous cell ca        | sp Q15020 SART3_HUMAN | 3  | 5.2  | 0.3986332 | 0.19501 | 0.9984 | 0.6012  | 0.19501 | 0.99836 | 7  | 8.7  | NA      | NA      | NA     | NA      | NA      | NA     | NA |
| 985  | Q15029 | EFTUD2  | 116 kDa U5 sma          | sp Q15029 U5S1_HUMAN  | 14 | 18   | 0.1904116 | 0.46305 | 0.9991 | 0.4093  | 0.12539 | 0.28864 | 25 | 32.5 | -0.2773 | 0.28961 | 0.9973 | 0.41757 | 0.1184  | 0.1806 | NA |
| 986  | Q15046 | KARS    | Lysine-tRNA liga        | sp Q15046 SYK_HUMAN   | 12 | 26.5 | -0.113762 | 0.70708 | 0.9991 | 0.0695  | 0.81825 | 0.91051 | 22 | 40.2 | 0.43873 | 0.15925 | 0.9973 | 1.51951 | #####   | 0.0005 | 1  |
| 987  | Q15050 | RRS1    | Ribosome biogen         | sp Q15050 RRS1_HUMAN  | 3  | 11.5 | 0.1169961 | NA      | NA     | NA      | NA      | NA      | 3  | 14   | NA      | NA      | NA     | NA      | NA      | NA     | NA |
| 988  | Q15056 | EIF4H   | Eukaryotic trans        | sp Q15056 IF4H_HUMAN  | 5  | 29.8 | 0.4320008 | 0.48654 | 0.9991 | -0.5794 | 0.50897 | 0.68136 | 8  | 46.8 | 0.63435 | 0.31163 | 0.9973 | 3.60983 | #####   | 0.0002 | 2  |
| 989  | Q15075 | EEA1    | Early endosome          | sp Q15075 EEA1_HUMAN  | 5  | 4.2  | NA        | NA      | NA     | NA      | NA      | NA      | 10 | 8.1  | 0.0808  | 0.91926 | 0.9991 | 1.07434 | 0.9193  | 0.9991 | NA |
| 990  | Q15084 | PDIA6   | Protein disulfide       | sp Q15084 PDIA6_HUMAN | 9  | 27.7 | -0.272313 | 0.1463  | 0.9984 | 0.2798  | 0.1463  | 0.99836 | 13 | 40.7 | NA      | NA      | NA     | NA      | 3.10619 | NA     | NA |
| 991  | Q15125 | EBP     | 3-beta-hydroxys         | sp Q15125 EBP_HUMAN   | 3  | 1    | 5.2       | NA      | NA     | NA      | NA      | NA      | 1  | 5.2  | NA      | NA      | NA     | NA      | NA      | NA     | NA |
| 992  | Q15181 | PPA1    | Inorganic pyroph        | sp Q15181 IPYR_HUMAN  | 12 | 49.1 | 0.041155  | 0.80636 | 0.9991 | -0.5068 | 0.01473 | 0.08033 | 14 | 61.6 | -0.1074 | 0.52484 | 0.9973 | 0.64876 | 0.0013  | 0.0039 | 2  |
| 993  | Q15185 | PTGES3  | Prostaglandin E         | sp Q15185 TEBP_HUMAN  | 4  | 28.8 | -0.103485 | 0.70937 | 0.9991 | -0.4113 | 0.30293 | 0.503   | 5  | 36.9 | 0.04419 | 0.87331 | 0.9973 | 1.41678 | 0.0001  | 0.0005 | 2  |
| 994  | Q15233 | NONO    | Non-POU domain          | sp Q15233 NONO_HUMAN  | 18 | 44.8 | 0.2007395 | 0.38941 | 0.9991 | 0.3788  | 0.11423 | 0.27928 | 20 | 48.2 | -0.0529 | 0.8185  | 0.9973 | 0.4118  | 0.0881  | 0.1435 | NA |
| 995  | Q15257 | PTPA    | Serine/threonine        | sp Q15257 PTPA_HUMAN  | 3  | 18.2 | 0.461486  | NA      | NA     | NA      | NA      | NA      | 2  | 7.3  | NA      | NA      | NA     | NA      | NA      | NA     | NA |
| 996  | Q15286 | RAB35   | Ras-related prot        | sp Q15286 RAB35_HUMAN | 2  | 11.9 | -0.141464 | 0.65516 | 0.9984 | -0.4691 | 0.65516 | 0.99836 | 2  | 12.9 | NA      | NA      | NA     | NA      | NA      | NA     | NA |
| 997  | Q15287 | RNPS1   | RNA-binding pro         | sp Q15287 RNPS1_HUMAN | 3  | 9.8  | 0.2009932 | 0.49497 | 0.9991 | 0.6681  | 0.05483 | 0.18165 | 4  | 13.8 | 0.22687 | 0.44208 | 0.9973 | 0.23102 | 0.4339  | 0.5259 | NA |
| 998  | Q15293 | RCN1    | Reticulocalbin-1        | sp Q15293 RCN1_HUMAN  | 6  | 26.3 | 0.0808911 | 0.79868 | 0.9991 | 0.4996  | 0.12851 | 0.29391 | 11 | 49.2 | -0.2035 | 0.5233  | 0.9973 | -0.0005 | 0.9986  | 0.9986 | NA |
| 999  | Q15363 | TMED2   | Transmembrane           | sp Q15363 TMED2_HUMAN | 4  | 24.9 | 0.0194197 | 0.94341 | 0.9991 | 0.365   | 0.1946  | 0.37903 | 4  | 22.9 | -0.227  | 0.36032 | 0.9973 | -0.2815 | 0.2601  | 0.3433 | NA |
| 1000 | Q15365 | PCBP1   | Poly(rC)-binding        | sp Q15365 PCBP1_HUMAN | 13 | 47.8 | -0.316283 | 0.2127  | 0.9991 | -0.5969 | 0.02602 | 0.11746 | 13 | 59.6 | 0.28973 | 0.25183 | 0.9973 | 0.91438 | 0.0017  | 0.005  | 2  |
| 1001 | Q15366 | PCBP2   | Poly(rC)-binding        | sp Q15366 PCBP2_HUMAN | 12 | 41.6 | -0.651205 | 0.26454 | 0.9991 | 0.6534  | 0.42355 | 0.61448 | 10 | 40   | -0.5257 | 0.36412 | 0.9973 | 1.98451 | 0.0032  | 0.0084 | 1  |
| 1002 | Q15369 | ELOC    | Elongin-C               | sp Q15369 ELOC_HUMAN  | 3  | 32.1 | 0.5206093 | 0.05061 | 0.9991 | -0.4552 | 0.20785 | 0.39404 | 3  | 41.1 | 0.03009 | 0.90358 | 0.9973 | -0.1212 | 0.6269  | 0.7123 | NA |
| 1003 | Q15370 | ELOB    | Elongin-B               | sp Q15370 ELOB_HUMAN  | 3  | 21.2 | -0.159094 | 0.64673 | 0.9991 | -0.1688 | 0.627   | 0.77546 | 6  | 37.3 | -0.0116 | 0.97317 | 0.9973 | -0.4086 | 0.2475  | 0.3323 | NA |
| 1004 | Q15382 | RHEB    | GTP-binding pro         | sp Q15382 RHEB_HUMAN  | 2  | 13   | 0.111777  | NA      | NA     | NA      | NA      | NA      | 2  | 13   | -0.0215 | NA      | NA     | NA      | NA      | NA     | NA |

|      |        |           |                   |                       |    |      |           |         |        |         |         |         |    |      |         |         |        |         |        |        |    |    |
|------|--------|-----------|-------------------|-----------------------|----|------|-----------|---------|--------|---------|---------|---------|----|------|---------|---------|--------|---------|--------|--------|----|----|
| 1005 | Q15392 | DHCR24    | Delta(24)-sterol  | sp Q15392 DHC24_HUMAN | 4  | 10.3 | -0.109577 | 0.60921 | 0.9984 | 0.1738  | 0.60921 | 0.99836 | 2  | 4.3  | NA      | NA      | NA     | NA      | NA     | NA     | NA | NA |
| 1006 | Q15393 | SF3B3     | Splicing factor 3 | sp Q15393 SF3B3_HUMAN | 21 | 22.2 | -0.108682 | 0.66295 | 0.9991 | -0.2145 | 0.39376 | 0.60102 | 22 | 25.4 | -0.0318 | 0.89837 | 0.9973 | -0.782  | 0.0055 | 0.0136 | 4  |    |
| 1007 | Q15417 | CNN3      | Calponin-3        | sp Q15417 CNN3_HUMAN  | 5  | 20.4 | 0.190301  | 0.41546 | 0.9991 | 0.0256  | 0.92113 | 0.9534  | 8  | 31.9 | 0.33176 | 0.16469 | 0.9973 | 0.31751 | 0.1825 | 0.2635 | NA |    |
| 1008 | Q15424 | SAFB      | Scaffold attachm  | sp Q15424 SAFB1_HUMAN | 8  | 14.4 | 0.4371981 | 0.16679 | 0.9984 | 0.3144  | 0.16679 | 0.99836 | 13 | 18.6 | NA      | NA      | NA     | NA      | NA     | NA     | NA |    |
| 1009 | Q15427 | SF3B4     | Splicing factor 3 | sp Q15427 SF3B4_HUMAN | 5  | 12.5 | 0.0473112 | 0.89329 | 0.9991 | 0.6384  | 0.08424 | 0.23606 | 6  | 19.3 | 0.15531 | 0.66058 | 0.9973 | 0.79006 | 0.0367 | 0.0669 | 1  |    |
| 1010 | Q15437 | SEC23B    | Protein transpor  | sp Q15437 SC23B_HUMAN | 3  | 4.6  | NA        | NA      | NA     | NA      | NA      | NA      | 8  | 13.4 | 0.10498 | NA      | NA     | NA      | NA     | NA     | NA |    |
| 1011 | Q15459 | SF3A1     | Splicing factor 3 | sp Q15459 SF3A1_HUMAN | 20 | 31.5 | 0.0889171 | 0.70016 | 0.9991 | 0.3733  | 0.11898 | 0.2853  | 22 | 35.3 | -0.0714 | 0.757   | 0.9973 | -0.5247 | 0.0341 | 0.0622 | 5  |    |
| 1012 | Q15631 | TSN       | Translin          | sp Q15631 TSN_HUMAN   | 2  | 11.8 | 0.1457934 | 0.48629 | 0.9984 | -0.2392 | 0.48629 | 0.99836 | 4  | 25   | NA      | NA      | NA     | NA      | NA     | NA     | NA |    |
| 1013 | Q15637 | SF1       | Splicing factor 1 | sp Q15637 SF01_HUMAN  | 6  | 13.3 | -0.311048 | 0.32159 | 0.9991 | 0.342   | 0.27727 | 0.47715 | 9  | 19.1 | -0.2395 | 0.4426  | 0.9973 | 0.02509 | 0.9353 | 0.9446 | NA |    |
| 1014 | Q15645 | TRIP13    | Pachytene check   | sp Q15645 PCH2_HUMAN  | 2  | 5.8  | 0.3757318 | 0.2585  | 0.9991 | 0.0731  | 0.84464 | 0.91848 | 8  | 17.8 | 0.24071 | 0.27652 | 0.9973 | -0.0953 | 0.6593 | 0.7397 | NA |    |
| 1015 | Q15651 | HMGN3     | High mobility gr  | sp Q15651 HMGN3_HUMA  | 2  | 20.2 | 0.4698831 | 0.19157 | 0.9984 | 0.5893  | 0.19157 | 0.99836 | NA | NA   | NA      | NA      | NA     | NA      | NA     | NA     | NA |    |
| 1016 | Q15691 | MAPRE1    | Microtubule-ass   | sp Q15691 MARE1_HUMA  | 6  | 23.9 | 0.0937037 | 0.6869  | 0.9991 | -0.7599 | 0.00917 | 0.06248 | 10 | 53.7 | 0.31301 | 0.18971 | 0.9973 | 1.46073 | #####  | #####  | 2  |    |
| 1017 | Q15717 | ELAVL1    | ELAV-like protei  | sp Q15717 ELAV1_HUMAN | 8  | 34   | -0.246069 | 0.25227 | 0.9991 | 0.3906  | 0.07752 | 0.22519 | 9  | 36.8 | -0.2539 | 0.23805 | 0.9973 | -0.3329 | 0.1275 | 0.1931 | NA |    |
| 1018 | Q15738 | NSDHL     | Sterol-4-alpha-ca | sp Q15738 NSDHL_HUMAN | 5  | 16.4 | 0.0379774 | 0.90672 | 0.9987 | 0.7166  | 0.90672 | 0.99874 | 2  | 5.4  | NA      | NA      | NA     | NA      | NA     | NA     | NA |    |
| 1019 | Q15758 | SLC1A5    | Neutral amino a   | sp Q15758 AAAT_HUMAN  | 6  | 13.5 | 0.2830417 | 0.32705 | 0.9984 | 1.1212  | 0.32705 | 0.99836 | 3  | 7.8  | NA      | NA      | NA     | NA      | NA     | NA     | NA |    |
| 1020 | Q15785 | TOMM34    | Mitochondrial in  | sp Q15785 TOM34_HUMA  | 2  | 7.8  | NA        | NA      | NA     | NA      | NA      | NA      | 11 | 45.3 | NA      | NA      | NA     | 2.88456 | NA     | NA     | NA |    |
| 1021 | Q15819 | UBE2V2    | Ubiquitin-conjug  | sp Q15819 UB2V2_HUMAN | 5  | 46.9 | 0.0170702 | 0.96079 | 0.9991 | -0.8045 | 0.05201 | 0.17799 | 7  | 58.6 | 0.24661 | 0.48123 | 0.9973 | 0.18702 | 0.5919 | 0.6791 | NA |    |
| 1022 | Q16181 | Sep-07    | Septin-7          | sp Q16181 SEPT7_HUMAN | 7  | 16.5 | 0.0381557 | 0.88007 | 0.9991 | -0.6078 | 0.02634 | 0.11746 | 9  | 22.4 | 0.21039 | 0.41028 | 0.9973 | 0.7149  | 0.0109 | 0.0238 | 2  |    |
| 1023 | Q16186 | ADRM1     | Proteasomal ubi   | sp Q16186 ADRM1_HUMA  | 4  | 13.3 | -0.004496 | 0.98672 | 0.999  | 0.3287  | 0.98672 | 0.99899 | 3  | 10.6 | NA      | NA      | NA     | NA      | NA     | NA     | NA |    |
| 1024 | Q16204 | CCDC6     | Coiled-coil doma  | sp Q16204 CCDC6_HUMAN | 3  | 8    | 0.5962828 | NA      | NA     | NA      | NA      | NA      | NA | NA   | NA      | NA      | NA     | NA      | NA     | NA     | NA |    |
| 1025 | Q16531 | DDB1      | DNA damage-bir    | sp Q16531 DDB1_HUMAN  | 11 | 11   | -0.204687 | 0.4591  | 0.9991 | -0.5002 | 0.08205 | 0.23269 | 18 | 18.2 | 0.02549 | 0.92591 | 0.9973 | 0.22297 | 0.4207 | 0.5134 | NA |    |
| 1026 | Q16543 | CDC37     | Hsp90 co-chaper   | sp Q16543 CDC37_HUMAN | 10 | 28.6 | 0.0409187 | 0.85545 | 0.9991 | -0.4045 | 0.0856  | 0.238   | 11 | 32   | -0.0503 | 0.82282 | 0.9973 | 1.92146 | #####  | #####  | 2  |    |
| 1027 | Q16555 | DPYSL2    | Dihydropyrimidi   | sp Q16555 DPYL2_HUMAN | 18 | 47.7 | 0.0332001 | 0.91606 | 0.9991 | -0.906  | 0.01922 | 0.09731 | 24 | 63.1 | 0.02724 | 0.93108 | 0.9973 | 3.9178  | #####  | #####  | 2  |    |
| 1028 | Q16576 | RBBP7     | Histone-binding   | sp Q16576 RBBP7_HUMAN | 13 | 34.8 | -0.108989 | 0.69743 | 0.9991 | -0.133  | 0.63556 | 0.7779  | 14 | 46.6 | -0.0962 | 0.73144 | 0.9973 | -2.3772 | #####  | #####  | 4  |    |
| 1029 | Q16629 | SRSF7     | Serine/arginine-  | sp Q16629 SRSF7_HUMAN | 3  | 17.6 | 0.1858831 | 0.55629 | 0.9991 | 1.0131  | 0.03544 | 0.13729 | 8  | 30.3 | 0.27418 | 0.38888 | 0.9973 | 1.99692 | #####  | #####  | 1  |    |
| 1030 | Q16630 | CPSF6     | Cleavage and pc   | sp Q16630 CPSF6_HUMAN | 6  | 15.2 | 0.1151043 | 0.66831 | 0.9991 | 0.2032  | 0.50067 | 0.67575 | 6  | 17.1 | 0.11786 | 0.66091 | 0.9973 | 0.34729 | 0.2068 | 0.2937 | NA |    |
| 1031 | Q16643 | DBN1      | Drebrin           | sp Q16643 DREB_HUMAN  | 14 | 30.4 | -0.26456  | 0.34602 | 0.9991 | 0.1238  | 0.65581 | 0.79346 | 21 | 41.9 | -0.0491 | 0.8592  | 0.9973 | 3.23017 | #####  | #####  | 1  |    |
| 1032 | Q16658 | FSCN1     | Fascin            | sp Q16658 FSCN1_HUMAN | 15 | 40.8 | -0.316359 | 0.10572 | 0.9984 | -1.1529 | 0.10572 | 0.99836 | 22 | 58.8 | NA      | NA      | NA     | NA      | NA     | NA     | NA |    |
| 1033 | Q16718 | NDUFA5    | NADH dehydrog     | sp Q16718 NDUA5_HUMA  | 2  | 20.7 | -0.19447  | NA      | NA     | NA      | NA      | NA      | 3  | 43.1 | NA      | NA      | NA     | NA      | NA     | NA     | NA |    |
| 1034 | Q16740 | CLPP      | ATP-dependent     | sp Q16740 CLPP_HUMAN  | 2  | 10.8 | NA        | NA      | NA     | NA      | NA      | NA      | 4  | 21.7 | 0.17711 | 0.52406 | 0.9991 | -1.9302 | 0.5241 | 0.9991 | NA |    |
| 1035 | Q16799 | RTN1      | Reticulon-1       | sp Q16799 RTN1_HUMAN  | 2  | 2.1  | 0.4116702 | 0.48428 | 0.9984 | 0.368   | 0.48428 | 0.99836 | 2  | 2.1  | NA      | NA      | NA     | NA      | NA     | NA     | NA |    |
| 1036 | Q16822 | PCK2      | Phosphoenolpyr    | sp Q16822 PCKGM_HUMA  | 6  | 10.9 | -0.070014 | 0.79917 | 0.9984 | 0.577   | 0.79917 | 0.99836 | 4  | 7.7  | NA      | NA      | NA     | NA      | NA     | NA     | NA |    |
| 1037 | Q16836 | HADH      | Hydroxyacyl-coe   | sp Q16836 HCDH_HUMAN  | 4  | 17.8 | -0.144904 | 0.61372 | 0.9984 | 0.646   | 0.61372 | 0.99836 | 5  | 25.8 | NA      | NA      | NA     | NA      | NA     | NA     | NA |    |
| 1038 | Q16850 | CYP51A1   | Lanosterol 14-al  | sp Q16850 CP51A_HUMAN | 7  | 15.9 | -0.855577 | 0.24905 | 0.9984 | 0.1668  | 0.24905 | 0.99836 | 2  | 5.8  | NA      | NA      | NA     | NA      | NA     | NA     | NA |    |
| 1039 | Q16851 | UGP2      | UTP-glucose-1-p   | sp Q16851 UGPA_HUMAN  | 26 | 56.5 | 0.0354249 | 0.92032 | 0.999  | -1.1382 | 0.92032 | 0.99899 | 4  | 10.8 | NA      | NA      | NA     | NA      | NA     | NA     | NA |    |
| 1040 | Q16891 | IMMT      | MICOS complex     | sp Q16891 MIC60_HUMAN | 18 | 27.4 | 0.0625108 | 0.87268 | 0.9991 | 0.752   | 0.06749 | 0.20896 | 20 | 32.5 | -0.3338 | 0.39732 | 0.9973 | 1.25751 | 0.0047 | 0.0117 | 1  |    |
| 1041 | Q1KMD3 | HNRNPUL2  | Heterogeneous     | sp Q1KMD3 HNRL2_HUMA  | 11 | 16.7 | 0.1357958 | 0.66051 | 0.9991 | 1.0946  | 0.0023  | 0.02957 | 11 | 18.9 | -0.0036 | 0.99069 | 0.9973 | -0.6445 | 0.0493 | 0.0859 | 5  |    |
| 1042 | Q29RF7 | PDS5A     | Sister chromatic  | sp Q29RF7 PDS5A_HUMAN | 3  | 3.2  | 0.3923993 | NA      | NA     | NA      | NA      | NA      | 6  | 6.3  | NA      | NA      | NA     | NA      | NA     | NA     | NA |    |
| 1043 | Q2NL82 | TSR1      | Pre-rRNA-proces   | sp Q2NL82 TSR1_HUMAN  | 3  | 4.7  | NA        | NA      | NA     | NA      | NA      | NA      | 3  | 5    | -0.2425 | 0.30927 | 0.9991 | -1.1586 | 0.3093 | 0.9991 | NA |    |
| 1044 | Q2Q1W2 | TRIM71    | E3 ubiquitin-pro  | sp Q2Q1W2 UN41_HUMAN  | 5  | 5.6  | -0.069658 | 0.81622 | 0.9984 | 0.3195  | 0.81622 | 0.99836 | NA | NA   | NA      | NA      | NA     | NA      | NA     | NA     | NA |    |
| 1045 | Q32MZ4 | LRRFIP1   | Leucine-rich rep  | sp Q32MZ4 LRRF1_HUMAN | 8  | 11.4 | 0.1795928 | 0.56093 | 0.9991 | -0.4907 | 0.1247  | 0.2883  | 11 | 16.8 | -0.2973 | 0.39236 | 0.9973 | -0.0505 | 0.8832 | 0.9075 | NA |    |
| 1046 | Q4VC31 | CCDC58    | Coiled-coil doma  | sp Q4VC31 CCD58_HUMAN | 2  | 16.7 | -0.438771 | 0.4364  | 0.9991 | -0.7148 | 0.21566 | 0.40558 | 4  | 34   | -0.145  | 0.65268 | 0.9973 | 0.89062 | 0.0168 | 0.0348 | 2  |    |
| 1047 | Q52LI0 | FAM98B    | Protein FAM98B    | sp Q52LI0 FA98B_HUMAN | 3  | 13   | 0.2286627 | 0.22849 | 0.9984 | 0.0298  | 0.22849 | 0.99836 | 4  | 17.9 | NA      | NA      | NA     | NA      | NA     | NA     | NA |    |
| 1048 | Q53GQ0 | HSD17B12  | Very-long-chain   | sp Q53GQ0 DHB12_HUMA  | 5  | 14.4 | -0.297819 | 0.18312 | 0.9984 | 0.2663  | 0.18312 | 0.99836 | NA | NA   | NA      | NA      | NA     | NA      | NA     | NA     | NA |    |
| 1049 | Q53GS9 | USP39     | U4/U6.U5 tri-sn   | sp Q53GS9 SNUT2_HUMA  | 2  | 6    | NA        | NA      | NA     | NA      | NA      | NA      | 4  | 9.9  | 0.20854 | 0.43849 | 0.9991 | 0.74611 | 0.4385 | 0.9991 | NA |    |
| 1050 | Q58FF8 | HSP90AB2P | Putative heat sh  | sp Q58FF8 H90B_HUMAN  | 11 | 22.8 | 0.7224213 | 0.21179 | 0.9991 | -0.5207 | 0.41385 | 0.60623 | 9  | 21.8 | 0.66359 | 0.24952 | 0.9973 | 1.57174 | 0.0123 | 0.0265 | 2  |    |
| 1051 | Q5BKZ1 | ZNF326    | DBIRD complex s   | sp Q5BKZ1 ZN326_HUMAN | 4  | 11.7 | 0.1692036 | NA      | NA     | NA      | NA      | NA      | 4  | 7.7  | NA      | NA      | NA     | NA      | NA     | NA     | NA |    |
| 1052 | Q5H9R7 | PPP6R3    | Serine/threonin   | sp Q5H9R7 PP6R3_HUMAN | 4  | 5.6  | 0.1521736 | 0.55916 | 0.9984 | -0.0968 | 0.55916 | 0.99836 | 6  | 9.3  | -0.3465 | NA      | NA     | NA      | NA     | NA     | NA |    |

|      |        |          |                   |                       |    |      |           |         |        |         |         |         |    |      |         |         |        |         |        |        |    |    |
|------|--------|----------|-------------------|-----------------------|----|------|-----------|---------|--------|---------|---------|---------|----|------|---------|---------|--------|---------|--------|--------|----|----|
| 1053 | Q5JSH3 | WDR44    | WD repeat-cont    | sp Q5JSH3 WDR44_HUMAN | 6  | 8.9  | -0.388867 | 0.25647 | 0.9984 | -0.5473 | 0.25647 | 0.99836 | 1  | 1.9  | NA      | NA      | NA     | NA      | NA     | NA     | NA | NA |
| 1054 | Q5JTH9 | RRP12    | RRP12-like prote  | sp Q5JTH9 RRP12_HUMAN | 2  | 2.1  | NA        | NA      | NA     | NA      | NA      | NA      | 10 | 10.1 | 0.71444 | 0.07415 | 0.9991 | 0.03573 | 0.0741 | 0.9991 | NA | NA |
| 1055 | Q5T0U0 | CCDC122  | Coiled-coil doma  | sp Q5T0U0 CC122_HUMAN | 2  | 7    | -1.109108 | 0.00795 | 0.9984 | -0.1213 | 0.00795 | 0.99836 | NA | NA   | NA      | NA      | NA     | NA      | NA     | NA     | NA | NA |
| 1056 | Q5T4S7 | UBR4     | E3 ubiquitin-pro  | sp Q5T4S7 UBR4_HUMAN  | 7  | 1.5  | 0.0624791 | 0.81489 | 0.9984 | -0.0707 | 0.81489 | 0.99836 | 7  | 1.8  | NA      | NA      | NA     | NA      | NA     | NA     | NA | NA |
| 1057 | Q5T7N2 | L1TD1    | LINE-1 type tran  | sp Q5T7N2 L1TD1_HUMAN | 41 | 45   | -0.098373 | 0.51776 | 0.9984 | 0.6554  | 0.51776 | 0.99836 | NA | NA   | NA      | NA      | NA     | NA      | NA     | NA     | NA | NA |
| 1058 | Q5TFE4 | NT5DC1   | 5-nucleotidase d  | sp Q5TFE4 NT5D1_HUMAN | 5  | 16.5 | -0.181305 | 0.57274 | 0.9984 | -0.8355 | 0.57274 | 0.99836 | 2  | 4    | NA      | NA      | NA     | NA      | NA     | NA     | NA | NA |
| 1059 | Q5UIP0 | RIF1     | Telomere-associ   | sp Q5UIP0 RIF1_HUMAN  | 19 | 11   | 0.148608  | 0.61416 | 0.9984 | 0.1333  | 0.61416 | 0.99836 | 5  | 2.6  | NA      | NA      | NA     | NA      | NA     | NA     | NA | NA |
| 1060 | Q5VYK3 | ECPAS    | Proteasome ada    | sp Q5VYK3 ECM29_HUMAN | 13 | 8.5  | -0.274595 | 0.26251 | 0.9984 | -0.3365 | 0.26251 | 0.99836 | 17 | 12.1 | 0.01922 | NA      | NA     | NA      | NA     | NA     | NA | NA |
| 1061 | Q6DD88 | ATL3     | Atlastin-3        | sp Q6DD88 ATLA3_HUMAN | 1  | 3.5  | NA        | NA      | NA     | NA      | NA      | NA      | 4  | 11.1 | 0.25124 | 0.359   | 0.9991 | -1.5202 | 0.359  | 0.9991 | NA | NA |
| 1062 | Q6FI81 | CIAPIN1  | Anamorsin         | sp Q6FI81 CPIN1_HUMAN | 4  | 15.4 | 0.3834536 | 0.40764 | 0.9984 | -0.4394 | 0.40764 | 0.99836 | 8  | 37.2 | NA      | NA      | NA     | NA      | NA     | NA     | NA | NA |
| 1063 | Q6IAA8 | LAMTOR1  | Regulator compl   | sp Q6IAA8 LTOR1_HUMAN | 3  | 29.8 | -0.253438 | 0.25051 | 0.9984 | 0.2047  | 0.25051 | 0.99836 | 3  | 31.1 | NA      | NA      | NA     | NA      | NA     | NA     | NA | NA |
| 1064 | Q6IN85 | PPP4R3A  | Serine/threonin   | sp Q6IN85 P4R3A_HUMAN | 5  | 6.6  | 0.0707004 | NA      | NA     | NA      | NA      | NA      | 3  | 3.8  | NA      | NA      | NA     | NA      | NA     | NA     | NA | NA |
| 1065 | Q6NVY1 | HIBCH    | 3-hydroxyisobut   | sp Q6NVY1 HIBCH_HUMAN | 7  | 21.2 | 0.084149  | 0.70018 | 0.9984 | 0.4201  | 0.70018 | 0.99836 | 4  | 12.2 | NA      | NA      | NA     | NA      | NA     | NA     | NA | NA |
| 1066 | Q6P2Q9 | PRPF8    | Pre-mRNA-proce    | sp Q6P2Q9 PRP8_HUMAN  | 25 | 13.1 | -0.050321 | 0.75073 | 0.9991 | 0.1503  | 0.34869 | 0.54937 | 31 | 18.5 | 0.03025 | 0.8484  | 0.9973 | 0.00093 | 0.9953 | 0.9981 | NA | NA |
| 1067 | Q6P474 | PDXDC2P  | Putative pyridox  | sp Q6P474 PDXD2_HUMAN | 1  | 1    | NA        | NA      | NA     | NA      | NA      | NA      | 1  | 2.8  | NA      | NA      | NA     | NA      | NA     | NA     | NA | NA |
| 1068 | Q6PKG0 | LARP1    | La-related prote  | sp Q6PKG0 LARP1_HUMAN | 8  | 6.8  | -0.614685 | 0.06064 | 0.9991 | -0.4292 | 0.17813 | 0.35476 | 12 | 16.3 | -0.4564 | 0.15362 | 0.9973 | -0.4224 | 0.1847 | 0.2657 | NA | NA |
| 1069 | Q6UB35 | MTHFD1L  | Monofunctional    | sp Q6UB35 C1TM_HUMAN  | 7  | 9.6  | 0.0626317 | 0.77847 | 0.9984 | 0.1376  | 0.77847 | 0.99836 | 4  | 4.7  | -0.0011 | NA      | NA     | NA      | NA     | NA     | NA | NA |
| 1070 | Q6UN15 | FIP1L1   | Pre-mRNA 3-end    | sp Q6UN15 FIP1_HUMAN  | 3  | 8.8  | NA        | NA      | NA     | NA      | NA      | NA      | 4  | 8.8  | 0.12923 | 0.67659 | 0.9991 | 0.51143 | 0.6766 | 0.9991 | NA | NA |
| 1071 | Q6UW68 | TMEM205  | Transmembrane     | sp Q6UW68 TM205_HUMAN | 3  | 22.2 | -0.226647 | 0.53693 | 0.9984 | -0.0239 | 0.53693 | 0.99836 | 2  | 15.9 | NA      | NA      | NA     | NA      | NA     | NA     | NA | NA |
| 1072 | Q71DI3 | HIST2H3A | Histone H3.2      | sp Q71DI3 H32_HUMAN   | 8  | 53.7 | 0.2881617 | 0.54107 | 0.9991 | 0.7242  | 0.1358  | 0.30186 | 5  | 42.6 | 0.35821 | 0.44882 | 0.9973 | 1.96513 | 0.0006 | 0.002  | 1  | NA |
| 1073 | Q71UM5 | RPS27L   | 40S ribosomal p   | sp Q71UM5 RS27L_HUMAN | 2  | 28.6 | NA        | NA      | NA     | NA      | NA      | NA      | 3  | 33.3 | 0.27746 | 0.62037 | 0.9991 | -0.3171 | 0.6204 | 0.9991 | NA | NA |
| 1074 | Q7KZ85 | SUPT6H   | Transcription el  | sp Q7KZ85 SPT6H_HUMAN | 2  | 2.1  | NA        | NA      | NA     | NA      | NA      | NA      | 7  | 5.7  | 0.06902 | NA      | NA     | NA      | NA     | NA     | NA | NA |
| 1075 | Q7KZF4 | SND1     | Staphylococcal r  | sp Q7KZF4 SND1_HUMAN  | 24 | 31.1 | 0.0494389 | 0.826   | 0.9991 | -0.3213 | 0.16551 | 0.34014 | 32 | 44.2 | 0.03156 | 0.88834 | 0.9973 | -0.8389 | 0.0016 | 0.0046 | 4  | NA |
| 1076 | Q7L014 | DDX46    | Probable ATP-de   | sp Q7L014 DDX46_HUMAN | 6  | 7.1  | -0.11332  | NA      | NA     | NA      | NA      | NA      | 13 | 14.5 | 0.47819 | 0.06432 | 0.9991 | 0.89742 | 0.0643 | 0.9991 | NA | NA |
| 1077 | Q7L0Y3 | TRMT10C  | tRNA methyltra    | sp Q7L0Y3 TM10C_HUMAN | 4  | 10.2 | NA        | NA      | NA     | 1.2248  | NA      | NA      | 2  | 5.5  | NA      | NA      | NA     | NA      | NA     | NA     | NA | NA |
| 1078 | Q7L190 | DPPA4    | Developmental     | sp Q7L190 DPPA4_HUMAN | 2  | 12.5 | -0.194929 | 0.70624 | 0.9984 | 0.0902  | 0.70624 | 0.99836 | NA | NA   | NA      | NA      | NA     | NA      | NA     | NA     | NA | NA |
| 1079 | Q7L1Q6 | BZW1     | Basic leucine zip | sp Q7L1Q6 BZW1_HUMAN  | 8  | 17.2 | -0.012326 | 0.96086 | 0.9991 | -0.6893 | 0.02444 | 0.11253 | 11 | 27.4 | -0.4436 | 0.09233 | 0.9973 | -1.0128 | 0.0009 | 0.003  | 3  | NA |
| 1080 | Q7L2H7 | EIF3M    | Eukaryotic trans  | sp Q7L2H7 EIF3M_HUMAN | 4  | 14.7 | -0.169253 | 0.52545 | 0.9991 | -0.2162 | 0.56584 | 0.72534 | 15 | 54.3 | -0.0272 | 0.91808 | 0.9973 | -1.454  | #####  | 0.0003 | 4  | NA |
| 1081 | Q7L311 | ARMCX2   | Armadillo repea   | sp Q7L311 ARMX2_HUMAN | 3  | 17.1 | -0.119327 | NA      | NA     | NA      | NA      | NA      | NA | NA   | NA      | NA      | NA     | NA      | NA     | NA     | NA | NA |
| 1082 | Q9H8S9 | MOB1A    | MOB kinase acti   | sp Q9H8S9 MOB1A_HUMAN | 2  | 11.6 | 0.101086  | NA      | NA     | NA      | NA      | NA      | 3  | 16.7 | 0.20128 | NA      | NA     | NA      | NA     | NA     | NA | NA |
| 1083 | Q7Z2W4 | ZC3HAV1  | Zinc finger CCH   | sp Q7Z2W4 ZCCHV_HUMAN | 2  | 3    | NA        | NA      | NA     | -0.1164 | NA      | NA      | 5  | 8.4  | NA      | NA      | NA     | NA      | NA     | NA     | NA | NA |
| 1084 | Q7Z3K3 | POGZ     | Pogo transposab   | sp Q7Z3K3 POGZ_HUMAN  | 4  | 3.6  | 0.0933125 | 0.79243 | 0.9984 | 0.6792  | 0.79243 | 0.99836 | 3  | 3.4  | NA      | NA      | NA     | NA      | NA     | NA     | NA | NA |
| 1085 | Q7Z417 | NUFIP2   | Nuclear fragile X | sp Q7Z417 NUFP2_HUMAN | 5  | 9.5  | NA        | NA      | NA     | NA      | NA      | NA      | 8  | 17.6 | 0.12099 | NA      | NA     | NA      | NA     | NA     | NA | NA |
| 1086 | Q7Z4V5 | HDGFL2   | Hepatoma-deriv    | sp Q7Z4V5 HDGR2_HUMAN | 2  | 4.8  | 0.3222367 | 0.40206 | 0.9984 | 0.4464  | 0.40206 | 0.99836 | 4  | 7.3  | NA      | NA      | NA     | NA      | NA     | NA     | NA | NA |
| 1087 | Q7Z6Z7 | HUWE1    | E3 ubiquitin-pro  | sp Q7Z6Z7 HUWE1_HUMAN | 8  | 2.1  | NA        | NA      | NA     | NA      | NA      | NA      | 6  | 1.9  | -0.1802 | NA      | NA     | NA      | NA     | NA     | NA | NA |
| 1088 | Q7Z739 | YTHDF3   | YTH domain-con    | sp Q7Z739 YTHD3_HUMAN | 5  | 9.6  | NA        | NA      | NA     | NA      | NA      | NA      | 10 | 20.2 | 0.3495  | 0.2258  | 0.9991 | 0.49999 | 0.2258 | 0.9991 | NA | NA |
| 1089 | Q7Z7K6 | CENPV    | Centromere pro    | sp Q7Z7K6 CENPV_HUMAN | 3  | 14.9 | 0.2477644 | 0.39442 | 0.9984 | 0.3781  | 0.39442 | 0.99836 | 1  | 4.7  | NA      | NA      | NA     | NA      | NA     | NA     | NA | NA |
| 1090 | Q86U42 | PABPN1   | Polyadenylate-b   | sp Q86U42 PABP2_HUMAN | 6  | 24.8 | -0.003382 | 0.9918  | 0.9991 | 0.8793  | 0.01509 | 0.08154 | 6  | 27.1 | -0.079  | 0.81039 | 0.9973 | -0.0462 | 0.8882 | 0.908  | 5  | NA |
| 1091 | Q86UP2 | KTN1     | Kinectin          | sp Q86UP2 KTN1_HUMAN  | 10 | 8    | 0.2342649 | 0.89203 | 0.9991 | 0.1875  | 0.91349 | 0.94965 | 43 | 37.4 | -0.2824 | 0.80016 | 0.9973 | 2.07569 | 0.0866 | 0.1424 | NA | NA |
| 1092 | Q86UV5 | USP48    | Ubiquitin carbox  | sp Q86UV5 UBP48_HUMAN | 2  | 2.8  | -0.091231 | NA      | NA     | NA      | NA      | NA      | 3  | 4    | NA      | NA      | NA     | NA      | NA     | NA     | NA | NA |
| 1093 | Q86V81 | ALYREF   | THO complex sub   | sp Q86V81 THOC4_HUMAN | 6  | 26.5 | -0.225128 | 0.47662 | 0.9991 | -0.0084 | 0.97859 | 0.98415 | 9  | 43.2 | 0.14426 | 0.6468  | 0.9973 | 0.36152 | 0.2588 | 0.343  | NA | NA |
| 1094 | Q86VP6 | CAND1    | Cullin-associated | sp Q86VP6 CAND1_HUMAN | 18 | 18   | 0.643557  | 0.01657 | 0.9991 | -0.6841 | 0.0117  | 0.07028 | 24 | 27.9 | -0.1026 | 0.67587 | 0.9973 | -0.1706 | 0.4891 | 0.5797 | 3  | NA |
| 1095 | Q86X55 | CARM1    | Histone-arginine  | sp Q86X55 CARM1_HUMAN | 5  | 9.7  | -0.312755 | 0.25195 | 0.9991 | -0.0338 | 0.92848 | 0.9536  | 5  | 9.9  | 0.2118  | 0.43163 | 0.9973 | -0.5176 | 0.0991 | 0.1576 | NA | NA |
| 1096 | Q86XP3 | DDX42    | ATP-dependent     | sp Q86XP3 DDX42_HUMAN | 10 | 13.1 | -0.069757 | 0.67891 | 0.9984 | -0.0322 | 0.67891 | 0.99836 | 12 | 15.2 | 0.17225 | NA      | NA     | NA      | NA     | NA     | NA | NA |
| 1097 | Q86YP4 | GATAD2A  | Transcriptional r | sp Q86YP4 P66A_HUMAN  | 4  | 6.8  | 0.5827001 | 0.26955 | 0.9984 | -0.3423 | 0.26955 | 0.99836 | NA | NA   | NA      | NA      | NA     | NA      | NA     | NA     | NA | NA |
| 1098 | Q8IVW6 | ARID3B   | AT-rich interact  | sp Q8IVW6 ARI3B_HUMAN | 3  | 7.3  | NA        | NA      | NA     | -0.0488 | NA      | NA      | NA | NA   | NA      | NA      | NA     | NA      | NA     | NA     | NA | NA |
| 1099 | Q8IWA0 | WDR75    | WD repeat-cont    | sp Q8IWA0 WDR75_HUMAN | 3  | 5.1  | -0.041325 | 0.91968 | 0.999  | 1.3029  | 0.91968 | 0.99899 | 4  | 7.5  | NA      | NA      | NA     | NA      | NA     | NA     | NA | NA |
| 1100 | Q8IWS0 | PHF6     | PHD finger prote  | sp Q8IWS0 PHF6_HUMAN  | 4  | 15.1 | 0.1944294 | 0.43792 | 0.9984 | 0.3682  | 0.43792 | 0.99836 | 3  | 7.7  | NA      | NA      | NA     | NA      | NA     | NA     | NA | NA |

|      |        |         |                    |                        |    |      |           |         |        |         |         |         |    |      |         |         |        |         |        |        |    |
|------|--------|---------|--------------------|------------------------|----|------|-----------|---------|--------|---------|---------|---------|----|------|---------|---------|--------|---------|--------|--------|----|
| 1101 | Q8IX12 | CCAR1   | Cell division cycl | sp Q8IX12 CCAR1_HUMAN  | 8  | 9    | -0.278869 | 0.4132  | 0.9984 | 0.8446  | 0.4132  | 0.99836 | 5  | 5.1  | NA      | NA      | NA     | NA      | NA     | NA     | NA |
| 1102 | Q8IY81 | FTSJ3   | pre-rRNA 2-O-rib   | sp Q8IY81 SPB1_HUMAN   | 4  | 6    | -0.61926  | 0.30665 | 0.9991 | 0.1286  | 0.82762 | 0.91541 | 7  | 12.6 | -0.0201 | 0.98245 | 0.9973 | 0.30049 | 0.6884 | 0.7602 | NA |
| 1103 | Q8IYB3 | SRRM1   | Serine/arginine    | sp Q8IYB3 SRRM1_HUMAN  | 2  | 2.8  | 0.413414  | 0.67421 | 0.9984 | 0.8774  | 0.67421 | 0.99836 | 4  | 7.9  | NA      | NA      | NA     | NA      | NA     | NA     | NA |
| 1104 | Q8IZL8 | PELP1   | Proline-, glutam   | sp Q8IZL8 PELP1_HUMAN  | 1  | 2.2  | NA        | NA      | NA     | NA      | NA      | NA      | NA | NA   | NA      | NA      | NA     | NA      | NA     | NA     |    |
| 1105 | Q8NOW4 | NLGN4X  | Neuroigin-4, X-l   | sp Q8NOW4 NLGNX_HUMA   | 3  | 5.6  | -0.244938 | 0.45613 | 0.9984 | 0.5045  | 0.45613 | 0.99836 | NA | NA   | NA      | NA      | NA     | NA      | NA     | NA     |    |
| 1106 | Q8N163 | CCAR2   | Cell cycle and ap  | sp Q8N163 CCAR2_HUMA   | 18 | 26.2 | 0.0499372 | 0.87706 | 0.9991 | 1.1052  | 0.00352 | 0.03677 | 16 | 24.5 | 1.084   | 0.01416 | 0.9973 | 4.04964 | #####  | #####  | 1  |
| 1107 | Q8N1F7 | NUP93   | Nuclear pore cor   | sp Q8N1F7 NUP93_HUMA   | 11 | 15.5 | -0.183647 | 0.44992 | 0.9991 | 0.1757  | 0.46948 | 0.64919 | 15 | 23.4 | -0.5641 | 0.02993 | 0.9973 | -0.0104 | 0.9655 | 0.9723 | 5  |
| 1108 | Q8N1G4 | LIRC47  | Leucine-rich repe  | sp Q8N1G4 LIRC47_HUMAN | 8  | 17.7 | 0.0879878 | 0.69502 | 0.9984 | -0.4532 | 0.69502 | 0.99836 | 10 | 22.3 | NA      | NA      | NA     | NA      | NA     | NA     | NA |
| 1109 | Q8N474 | SFRP1   | Secreted frizzled  | sp Q8N474 SFRP1_HUMAN  | 1  | 5.1  | NA        | NA      | NA     | NA      | NA      | NA      | NA | NA   | NA      | NA      | NA     | NA      | NA     | NA     |    |
| 1110 | Q8N5K1 | CISD2   | CDGSH iron-sulfu   | sp Q8N5K1 CISD2_HUMAN  | 3  | 22.2 | 0.3093172 | 0.53815 | 0.9991 | 1.4579  | 0.01651 | 0.08736 | 5  | 41.5 | 0.38267 | 0.39737 | 0.9973 | 0.60725 | 0.1874 | 0.269  | 1  |
| 1111 | Q8N7H5 | PAF1    | RNA polymerase     | sp Q8N7H5 PAF1_HUMAN   | 4  | 9.4  | NA        | NA      | NA     | NA      | NA      | NA      | 7  | 16.8 | NA      | NA      | NA     | 0.57411 | NA     | NA     | NA |
| 1112 | Q8N8S7 | ENAH    | Protein enabled    | sp Q8N8S7 ENAH_HUMAN   | 6  | 13.5 | 0.3950243 | 0.22414 | 0.9984 | -0.0095 | 0.22414 | 0.99836 | 4  | 6.3  | NA      | NA      | NA     | NA      | NA     | NA     | NA |
| 1113 | Q8NBS9 | TXNDC5  | Thioredoxin dom    | sp Q8NBS9 TXNDC5_HUMA  | 2  | 7.2  | -0.302779 | NA      | NA     | NA      | NA      | NA      | 15 | 39.6 | NA      | NA      | NA     | 3.99162 | NA     | NA     | NA |
| 1114 | Q8NC51 | SERBP1  | Plasminogen act    | sp Q8NC51 PAIRB_HUMAN  | 14 | 42.6 | 0.1647344 | 0.60423 | 0.9991 | -0.3333 | 0.30045 | 0.50005 | 20 | 55.4 | 0.09489 | 0.76464 | 0.9973 | 0.80273 | 0.0201 | 0.0404 | 2  |
| 1115 | Q8NE71 | ABCF1   | ATP-binding cass   | sp Q8NE71 ABCF1_HUMA   | 13 | 20.1 | 0.6389884 | 0.05272 | 0.9984 | 0.2193  | 0.05272 | 0.99836 | 10 | 15   | NA      | NA      | NA     | NA      | NA     | NA     | NA |
| 1116 | Q8NF37 | LPCAT1  | Lysophosphatidy    | sp Q8NF37 PCAT1_HUMA   | 3  | 7.1  | 0.068342  | 0.73909 | 0.9984 | 0.4875  | 0.73909 | 0.99836 | 3  | 6.2  | NA      | NA      | NA     | NA      | NA     | NA     | NA |
| 1117 | Q8NFW8 | CMAS    | N-acylneuramina    | sp Q8NFW8 NEUA_HUMA    | 3  | 6.2  | NA        | NA      | NA     | NA      | NA      | NA      | 3  | 8.1  | -0.1432 | NA      | NA     | NA      | NA     | NA     | NA |
| 1118 | Q8NI22 | MCFD2   | Multiple coagula   | sp Q8NI22 MCFD2_HUMA   | 3  | 44.5 | -0.054158 | NA      | NA     | NA      | NA      | NA      | 3  | 44.5 | NA      | NA      | NA     | NA      | NA     | NA     | NA |
| 1119 | Q8NI27 | THOC2   | THO complex sub    | sp Q8NI27 THOC2_HUMAN  | 2  | 1.6  | NA        | NA      | NA     | NA      | NA      | NA      | 2  | 1.3  | 0.42158 | NA      | NA     | NA      | NA     | NA     | NA |
| 1120 | Q8NI36 | WDR36   | WD repeat-cont     | sp Q8NI36 WDR36_HUMA   | 5  | 5.4  | 0.220614  | 0.49932 | 0.9984 | 0.5288  | 0.49932 | 0.99836 | 4  | 4.5  | NA      | NA      | NA     | NA      | NA     | NA     | NA |
| 1121 | Q8TAT6 | NPLOC4  | Nuclear protein    | sp Q8TAT6 NPL4_HUMAN   | 2  | 3.9  | NA        | NA      | NA     | 0.3596  | NA      | NA      | 6  | 12.3 | -0.1255 | NA      | NA     | NA      | NA     | NA     | NA |
| 1122 | Q8TC07 | TBC1D15 | TBC1 domain fan    | sp Q8TC07 TBC15_HUMAN  | 2  | 3.9  | NA        | NA      | NA     | NA      | NA      | NA      | 5  | 7.5  | 0.06893 | NA      | NA     | NA      | NA     | NA     | NA |
| 1123 | Q8TC12 | RDH11   | Retinol dehydro    | sp Q8TC12 RDH11_HUMA   | 5  | 22.3 | 0.1446656 | 0.55879 | 0.9984 | 0.122   | 0.55879 | 0.99836 | NA | NA   | NA      | NA      | NA     | NA      | NA     | NA     | NA |
| 1124 | Q8TCJ2 | STT3B   | Dolichyl-diphosp   | sp Q8TCJ2 STT3B_HUMAN  | 4  | 4.6  | 0.4331901 | 0.09034 | 0.9984 | 0.5084  | 0.09034 | 0.99836 | 1  | 1.1  | NA      | NA      | NA     | NA      | NA     | NA     | NA |
| 1125 | Q8TCS8 | PNPT1   | Polyribonucleoti   | sp Q8TCS8 PNPT1_HUMAN  | 5  | 8.6  | 0.2143271 | 0.4911  | 0.9984 | 0.7947  | 0.4911  | 0.99836 | 4  | 6.9  | 0.23367 | NA      | NA     | NA      | NA     | NA     | NA |
| 1126 | Q8TCT9 | HM13    | Minor histocomp    | sp Q8TCT9 HM13_HUMAN   | 7  | 19.4 | 0.0727457 | 0.80008 | 0.9991 | 0.6487  | 0.03688 | 0.14131 | 6  | 17.5 | 0.23668 | 0.46494 | 0.9973 | 0.38265 | 0.2444 | 0.3295 | 1  |
| 1127 | Q8TEM1 | NUP210  | Nuclear pore me    | sp Q8TEM1 PO210_HUMA   | 5  | 3.4  | 0.1959572 | 0.4819  | 0.9984 | 0.7993  | 0.4819  | 0.99836 | NA | NA   | NA      | NA      | NA     | NA      | NA     | NA     | NA |
| 1128 | Q8TEQ6 | GEMIN5  | Gem-associated     | sp Q8TEQ6 GEMI5_HUMA   | 5  | 6.2  | -0.433896 | 0.1617  | 0.9984 | 0.1696  | 0.1617  | 0.99836 | 6  | 5.2  | NA      | NA      | NA     | NA      | NA     | NA     | NA |
| 1129 | Q8WUM0 | NUP133  | Nuclear pore cor   | sp Q8WUM0 NU133_HUM    | 7  | 6.5  | -0.088616 | 0.71686 | 0.9984 | 0.43    | 0.71686 | 0.99836 | 3  | 3.3  | NA      | NA      | NA     | NA      | NA     | NA     | NA |
| 1130 | Q8WUM4 | PDCD6IP | Programmed cel     | sp Q8WUM4 PDC61_HUMA   | 8  | 9.6  | 0.4035597 | 0.1308  | 0.9991 | -0.3902 | 0.29127 | 0.49286 | 16 | 21.4 | -0.1346 | 0.60126 | 0.9973 | -0.3216 | 0.2219 | 0.306  | NA |
| 1131 | Q8WVJ2 | NUDCD2  | NudC domain-co     | sp Q8WVJ2 NUDC2_HUMA   | 2  | 17.8 | 0.3624544 | NA      | NA     | NA      | NA      | NA      | 4  | 36.3 | 0.26563 | 0.38339 | 0.9991 | -0.8673 | 0.3834 | 0.9991 | NA |
| 1132 | Q8WVM8 | SCFD1   | Sec1 family dom    | sp Q8WVM8 SCFD1_HUM    | 3  | 7.6  | 0.1023887 | 0.80343 | 0.9984 | 0.1288  | 0.80343 | 0.99836 | 4  | 10.4 | NA      | NA      | NA     | NA      | NA     | NA     | NA |
| 1133 | Q8WVV9 | HNRNPLL | Heterogeneous      | sp Q8WVV9 HNRLL_HUMA   | 1  | 3.3  | NA        | NA      | NA     | NA      | NA      | NA      | 7  | 18.8 | 0.0984  | NA      | NA     | NA      | NA     | NA     | NA |
| 1134 | Q8WVX9 | FAR1    | Fatty acyl-CoA r   | sp Q8WVX9 FACR1_HUMA   | 5  | 12.8 | 0.0030047 | 0.99316 | 0.999  | 0.317   | 0.99316 | 0.99899 | 4  | 10.3 | 0.09668 | NA      | NA     | NA      | NA     | NA     | NA |
| 1135 | Q8WW12 | PCNP    | PEST proteolytic   | sp Q8WW12 PCNP_HUMA    | 6  | 48.3 | 0.3034876 | 0.18293 | 0.9984 | 0.1028  | 0.18293 | 0.99836 | 6  | 36   | -0.0581 | NA      | NA     | NA      | NA     | NA     | NA |
| 1136 | Q8WWM7 | ATXN2L  | Ataxin-2-like pro  | sp Q8WWM7 ATX2L_HUM    | 9  | 10   | 0.0093924 | 0.9651  | 0.9991 | 0.3179  | 0.15181 | 0.32517 | 8  | 9.6  | -0.0366 | 0.86454 | 0.9973 | -0.5582 | 0.0176 | 0.036  | 5  |
| 1137 | Q8WWY3 | PRPF31  | U4/U6 small nud    | sp Q8WWY3 PRP31_HUMA   | 3  | 6.8  | 0.4517631 | 0.27998 | 0.9984 | 0.8487  | 0.27998 | 0.99836 | 5  | 11.6 | -0.7102 | NA      | NA     | NA      | NA     | NA     | NA |
| 1138 | Q8WXF1 | PSPC1   | Paraspeckle com    | sp Q8WXF1 PSPC1_HUMA   | 5  | 11.7 | 0.2225453 | 0.51745 | 0.9984 | 0.1346  | 0.51745 | 0.99836 | 7  | 18.5 | NA      | NA      | NA     | NA      | NA     | NA     | NA |
| 1139 | Q8WY07 | SLC7A3  | Cationic amino a   | sp Q8WY07 CTR3_HUMAN   | 3  | 6.8  | -0.006525 | 0.97136 | 0.999  | 0.2926  | 0.97136 | 0.99899 | NA | NA   | NA      | NA      | NA     | NA      | NA     | NA     | NA |
| 1140 | Q92499 | DDX1    | ATP-dependent      | sp Q92499 DDX1_HUMAN   | 15 | 25.1 | -0.066794 | 0.721   | 0.9991 | -0.3711 | 0.06021 | 0.19493 | 21 | 37.2 | 0.37503 | 0.05782 | 0.9973 | 0.22006 | 0.2483 | 0.3328 | NA |
| 1141 | Q92520 | FAM3C   | Protein FAM3C      | sp Q92520 FAM3C_HUMA   | 2  | 11.9 | 0.6761153 | 0.14658 | 0.9984 | 1.2269  | 0.14658 | 0.99836 | 3  | 16.3 | NA      | NA      | NA     | NA      | NA     | NA     | NA |
| 1142 | Q92522 | H1FX    | Histone H1x        | sp Q92522 H1X_HUMAN    | 2  | 14.1 | -0.08079  | 0.82676 | 0.9984 | 0.6639  | 0.82676 | 0.99836 | 2  | 12.7 | NA      | NA      | NA     | NA      | NA     | NA     | NA |
| 1143 | Q92598 | HSPH1   | Heat shock prot    | sp Q92598 HS105_HUMAN  | 26 | 39.5 | 0.2663297 | 0.20369 | 0.9991 | -0.6171 | 0.00722 | 0.05274 | 29 | 41.6 | 0.0261  | 0.89834 | 0.9973 | 0.07323 | 0.7205 | 0.7823 | 3  |
| 1144 | Q92616 | GCN1    | eIF-2-alpha kina   | sp Q92616 GCN1_HUMAN   | 8  | 3.7  | 0.1785148 | 0.6232  | 0.9991 | 0.5194  | 0.25377 | 0.45093 | 39 | 20.2 | -0.1797 | 0.48647 | 0.9973 | 1.66716 | #####  | 0.0001 | 1  |
| 1145 | Q92621 | NUP205  | Nuclear pore cor   | sp Q92621 NU205_HUMA   | 8  | 4.4  | 0.4819365 | 0.32566 | 0.9984 | 0.9978  | 0.32566 | 0.99836 | 8  | 5.2  | 0.24984 | NA      | NA     | NA      | NA     | NA     | NA |
| 1146 | Q92667 | AKAP1   | A-kinase anchor    | sp Q92667 AKAP1_HUMA   | 4  | 6.5  | 0.1130997 | 0.64627 | 0.9984 | 0.785   | 0.64627 | 0.99836 | 2  | 3.7  | NA      | NA      | NA     | NA      | NA     | NA     | NA |
| 1147 | Q92734 | TFG     | Protein TFG        | sp Q92734 TFG_HUMAN    | 4  | 20   | -0.324989 | 0.19486 | 0.9991 | -1.347  | 0.00014 | 0.00831 | 5  | 22   | -0.0051 | 0.98325 | 0.9973 | 0.25494 | 0.3041 | 0.3891 | 3  |
| 1148 | Q92769 | HDAC2   | Histone deacety    | sp Q92769 HDAC2_HUMA   | 7  | 15   | 0.0616423 | 0.80384 | 0.9984 | 0.6369  | 0.80384 | 0.99836 | 5  | 9.4  | NA      | NA      | NA     | NA      | NA     | NA     | NA |



|      |        |         |                   |                        |    |      |           |         |        |         |         |         |    |      |         |         |        |         |        |        |    |
|------|--------|---------|-------------------|------------------------|----|------|-----------|---------|--------|---------|---------|---------|----|------|---------|---------|--------|---------|--------|--------|----|
| 1149 | Q92804 | TAF15   | TATA-binding pr   | sp Q92804 RBP56_HUMAN  | 4  | 7.3  | 0.7167508 | 0.05342 | 0.9984 | 1.2236  | 0.05342 | 0.99836 | 7  | 17.6 | NA      | NA      | NA     | NA      | NA     | NA     | NA |
| 1150 | Q92833 | JARID2  | Protein Jumonji   | sp Q92833 JARID2_HUMAN | 2  | 2.5  | -0.390013 | NA      | NA     | NA      | NA      | NA      | NA | NA   | NA      | NA      | NA     | NA      | NA     | NA     |    |
| 1151 | Q92841 | DDX17   | Probable ATP-de   | sp Q92841 DDX17_HUMAN  | 15 | 21.5 | 0.139857  | 0.42767 | 0.9991 | 0.2909  | 0.10959 | 0.27869 | 24 | 36.1 | 0.17198 | 0.33177 | 0.9973 | 1.61606 | #####  | #####  | 1  |
| 1152 | Q92878 | RAD50   | DNA repair prot   | sp Q92878 RAD50_HUMAN  | 7  | 5.6  | 0.1067855 | 0.67441 | 0.9984 | 0.3567  | 0.67441 | 0.99836 | 3  | 2.7  | NA      | NA      | NA     | NA      | NA     | NA     | NA |
| 1153 | Q92879 | CELF1   | CUGBP Elav-like   | sp Q92879 CELF1_HUMAN  | 4  | 11.5 | -0.200492 | 0.43096 | 0.9984 | 0.1338  | 0.43096 | 0.99836 | 2  | 6.2  | NA      | NA      | NA     | NA      | NA     | NA     | NA |
| 1154 | Q92900 | UPF1    | Regulator of nor  | sp Q92900 RENT1_HUMAN  | 9  | 10.2 | -0.007291 | 0.97217 | 0.9991 | -0.3092 | 0.30468 | 0.50354 | 20 | 21.3 | 0.14428 | 0.49358 | 0.9973 | -0.2418 | 0.2582 | 0.3428 | NA |
| 1155 | Q92905 | COP55   | COP9 signalosom   | sp Q92905 CSN5_HUMAN   | 3  | 12.3 | 0.2638797 | NA      | NA     | NA      | NA      | NA      | 7  | 24.9 | -0.087  | 0.66528 | 0.9991 | -0.6863 | 0.6653 | 0.9991 | NA |
| 1156 | Q92922 | SMARCC1 | SWI/SNF comple    | sp Q92922 SMRC1_HUMAN  | 13 | 15.3 | 0.1754525 | 0.39533 | 0.9984 | 0.4633  | 0.39533 | 0.99836 | 11 | 13   | NA      | NA      | NA     | NA      | NA     | NA     | NA |
| 1157 | Q92945 | KHSRP   | Far upstream el   | sp Q92945 FUBP2_HUMAN  | 14 | 26.7 | -0.016496 | 0.94759 | 0.9991 | -0.0365 | 0.88448 | 0.9344  | 24 | 42.5 | -0.217  | 0.3925  | 0.9973 | 1.19541 | 0.0002 | 0.0007 | 1  |
| 1158 | Q92973 | TNPO1   | Transportin-1     | sp Q92973 TNPO1_HUMAN  | 7  | 9.1  | 0.0716112 | 0.74821 | 0.9991 | 0.0792  | 0.75086 | 0.86792 | 16 | 23.6 | 0.06506 | 0.77048 | 0.9973 | 0.473   | 0.0471 | 0.0824 | 1  |
| 1159 | Q92990 | GLMN    | Glomulin          | sp Q92990 GLMN_HUMAN   | 2  | 3.5  | 0.286584  | NA      | NA     | NA      | NA      | NA      | NA | NA   | NA      | NA      | NA     | NA      | NA     | NA     | NA |
| 1160 | Q93008 | USP9X   | Probable ubiquit  | sp Q93008 USP9X_HUMAN  | 11 | 5.8  | 0.3550563 | 0.1272  | 0.9984 | -0.112  | 0.1272  | 0.99836 | 5  | 2.8  | NA      | NA      | NA     | NA      | NA     | NA     | NA |
| 1161 | Q93009 | USP7    | Ubiquitin carbox  | sp Q93009 UBP7_HUMAN   | 5  | 5.4  | -0.156501 | 0.63886 | 0.9991 | 0.2011  | 0.62273 | 0.77459 | 10 | 10.3 | -0.1286 | 0.75192 | 0.9973 | -0.1292 | 0.6978 | 0.7683 | NA |
| 1162 | Q969G3 | SMARCE1 | SWI/SNF-related   | sp Q969G3 SMCE1_HUMAN  | 7  | 17.5 | -0.45758  | 0.2926  | 0.9984 | 0.8651  | 0.2926  | 0.99836 | 5  | 14.4 | NA      | NA      | NA     | NA      | NA     | NA     | NA |
| 1163 | Q969H8 | MYDGF   | Myeloid-derived   | sp Q969H8 MYDGF_HUMAN  | 2  | 13.9 | NA        | NA      | NA     | 0.9232  | NA      | NA      | 2  | 12.1 | NA      | NA      | NA     | NA      | NA     | NA     | NA |
| 1164 | Q969T9 | WBP2    | WW domain-bin     | sp Q969T9 WBP2_HUMAN   | 3  | 24.5 | NA        | NA      | NA     | NA      | NA      | NA      | 2  | 19.2 | -0.327  | NA      | NA     | NA      | NA     | NA     | NA |
| 1165 | Q969X6 | UTP4    | U3 small nucleol  | sp Q969X6 UTP4_HUMAN   | 3  | 5    | -1.206601 | 0.01016 | 0.9984 | 0.4182  | 0.01016 | 0.99836 | 3  | 5.5  | NA      | NA      | NA     | NA      | NA     | NA     | NA |
| 1166 | Q969Z0 | TBRG4   | FAST kinase dor   | sp Q969Z0 FAKD4_HUMAN  | 4  | 6.7  | -0.360156 | 0.28143 | 0.9984 | 0.1112  | 0.28143 | 0.99836 | 8  | 19.3 | NA      | NA      | NA     | NA      | NA     | NA     | NA |
| 1167 | Q96A26 | FAM162A | Protein FAM162    | sp Q96A26 F162A_HUMAN  | 3  | 18.8 | 0.0321062 | 0.91818 | 0.999  | 0.701   | 0.91818 | 0.99899 | 2  | 18.2 | NA      | NA      | NA     | NA      | NA     | NA     | NA |
| 1168 | Q96A33 | CCDC47  | Coiled-coil doma  | sp Q96A33 CCD47_HUMAN  | 6  | 14.5 | NA        | NA      | NA     | NA      | NA      | NA      | 3  | 9.3  | 0.22936 | 0.43575 | 0.9991 | -0.1034 | 0.4357 | 0.9991 | NA |
| 1169 | Q96A49 | SYAP1   | Synapse-associat  | sp Q96A49 SYAP1_HUMAN  | 3  | 9.7  | 0.053723  | 0.88291 | 0.9984 | 0.5215  | 0.88291 | 0.99836 | 3  | 10.5 | NA      | NA      | NA     | NA      | NA     | NA     | NA |
| 1170 | P61326 | MAGOH   | Protein mago na   | sp P61326 MGN_HUMAN    | 7  | 37   | 0.0270424 | 0.92053 | 0.9991 | 0.5472  | 0.05675 | 0.18627 | 7  | 43.8 | 0.14221 | 0.60134 | 0.9973 | 0.1082  | 0.6905 | 0.7613 | NA |
| 1171 | Q96AC1 | FERMT2  | Fermitin family   | sp Q96AC1 FERM2_HUMAN  | 6  | 11.6 | NA        | NA      | NA     | NA      | NA      | NA      | 8  | 15.6 | 0.14268 | 0.59943 | 0.9991 | 0.29353 | 0.5994 | 0.9991 | NA |
| 1172 | Q96AE4 | FUBP1   | Far upstream el   | sp Q96AE4 FUBP1_HUMAN  | 15 | 26.9 | -0.451096 | 0.23421 | 0.9991 | -0.5185 | 0.17537 | 0.35323 | 23 | 41.3 | 0.23319 | 0.71526 | 0.9973 | 4.93671 | #####  | #####  | 2  |
| 1173 | Q96AG4 | LRRC59  | Leucine-rich rep  | sp Q96AG4 LRC59_HUMAN  | 5  | 18.9 | 0.5937334 | 0.02437 | 0.9991 | 0.6231  | 0.01899 | 0.09686 | 12 | 40.7 | 0.28786 | 0.24636 | 0.9973 | -0.2092 | 0.395  | 0.4896 | 5  |
| 1174 | Q96AY3 | FKBP10  | Peptidyl-prolyl c | sp Q96AY3 FKB10_HUMAN  | 7  | 13.6 | -0.536043 | 0.0735  | 0.9984 | 0.3525  | 0.0735  | 0.99836 | 12 | 29.2 | NA      | NA      | NA     | NA      | NA     | NA     | NA |
| 1175 | Q96CW1 | AP2M1   | AP-2 complex su   | sp Q96CW1 AP2M1_HUMAN  | 3  | 7.4  | 0.0392761 | 0.83247 | 0.9984 | -0.0411 | 0.83247 | 0.99836 | 4  | 10.8 | 0.13586 | NA      | NA     | NA      | NA     | NA     | NA |
| 1176 | Q96DI7 | SNRNP40 | U5 small nuclear  | sp Q96DI7 SNR40_HUMAN  | 2  | 10.1 | NA        | NA      | NA     | NA      | NA      | NA      | 3  | 17.4 | 0.0478  | NA      | NA     | NA      | NA     | NA     | NA |
| 1177 | Q96FW1 | OTUB1   | Ubiquitin thioes  | sp Q96FW1 OTUB1_HUMAN  | 5  | 19.9 | 0.2039683 | 0.57103 | 0.9991 | -0.1693 | 0.73862 | 0.85849 | 10 | 51.7 | -0.2424 | 0.50174 | 0.9973 | 2.63606 | #####  | #####  | 2  |
| 1178 | Q96HE7 | ERO1A   | ERO1-like protei  | sp Q96HE7 ERO1A_HUMAN  | 1  | 3    | NA        | NA      | NA     | NA      | NA      | NA      | 8  | 18.8 | 0.3126  | 0.49867 | 0.9991 | 0.69396 | 0.4987 | 0.9991 | NA |
| 1179 | Q96HS1 | PGAM5   | Serine/threonin   | sp Q96HS1 PGAM5_HUMAN  | 3  | 11.8 | -0.187895 | 0.4913  | 0.9984 | 0.4622  | 0.4913  | 0.99836 | 1  | 3.5  | NA      | NA      | NA     | NA      | NA     | NA     | NA |
| 1180 | Q96I24 | FUBP3   | Far upstream el   | sp Q96I24 FUBP3_HUMAN  | 6  | 11.5 | 0.4131889 | 0.38526 | 0.9984 | 0.2576  | 0.38526 | 0.99836 | 8  | 18.2 | NA      | NA      | NA     | NA      | NA     | NA     | NA |
| 1181 | Q96I25 | RBM17   | Splicing factor 4 | sp Q96I25 SPF45_HUMAN  | 2  | 7.2  | 0.1177614 | 0.76166 | 0.9991 | 0.2539  | 0.41338 | 0.60623 | 5  | 16.7 | 0.12784 | 0.64227 | 0.9973 | -0.1001 | 0.7157 | 0.7806 | NA |
| 1182 | Q96IZ0 | PAWR    | PRKC apoptosis    | sp Q96IZ0 PAWR_HUMAN   | 4  | 22.4 | -0.153095 | NA      | NA     | NA      | NA      | NA      | NA | NA   | NA      | NA      | NA     | NA      | NA     | NA     | NA |
| 1183 | Q96J01 | THOC3   | THO complex sub   | sp Q96J01 THOC3_HUMAN  | 2  | 4.8  | NA        | NA      | NA     | 0.505   | NA      | NA      | 1  | 6    | NA      | NA      | NA     | NA      | NA     | NA     | NA |
| 1184 | Q96J17 | TMX3    | Protein disulfide | sp Q96J17 TMX3_HUMAN   | 3  | 7    | NA        | NA      | NA     | NA      | NA      | NA      | 2  | 4.2  | -0.1268 | NA      | NA     | NA      | NA     | NA     | NA |
| 1185 | Q96K17 | BT3L4   | Transcription fac | sp Q96K17 BT3L4_HUMAN  | 4  | 38.6 | 0.0362559 | 0.87725 | 0.9984 | -0.3463 | 0.87725 | 0.99836 | 4  | 38.6 | NA      | NA      | NA     | NA      | NA     | NA     | NA |
| 1186 | Q96KP4 | CNDP2   | Cytosolic non-sp  | sp Q96KP4 CNDP2_HUMAN  | 13 | 37.5 | 0.1764716 | 0.51327 | 0.9984 | -1.268  | 0.51327 | 0.99836 | 4  | 13.3 | -0.3784 | NA      | NA     | NA      | NA     | NA     | NA |
| 1187 | Q96P16 | RPRD1A  | Regulation of nu  | sp Q96P16 RPR1A_HUMAN  | 3  | 14.1 | 0.1422392 | 0.63058 | 0.9984 | -0.1562 | 0.63058 | 0.99836 | 1  | 3.8  | NA      | NA      | NA     | NA      | NA     | NA     | NA |
| 1188 | Q96P70 | IPO9    | Importin-9        | sp Q96P70 IPO9_HUMAN   | 8  | 12.1 | -0.220036 | 0.42933 | 0.9991 | -0.5148 | 0.10952 | 0.27869 | 8  | 11.9 | 0.08575 | 0.75598 | 0.9973 | 0.22581 | 0.4176 | 0.5104 | NA |
| 1189 | Q96PK6 | RBM14   | RNA-binding pro   | sp Q96PK6 RBM14_HUMAN  | 2  | 2.8  | NA        | NA      | NA     | NA      | NA      | NA      | 9  | 14.8 | -0.2856 | 0.37265 | 0.9991 | 0.50893 | 0.3727 | 0.9991 | NA |
| 1190 | Q96QD8 | SLC38A2 | Sodium-coupled    | sp Q96QD8 S38A2_HUMAN  | 2  | 7.3  | -0.352205 | 0.24295 | 0.9984 | 0.2593  | 0.24295 | 0.99836 | 1  | 4.2  | NA      | NA      | NA     | NA      | NA     | NA     | NA |
| 1191 | Q96QK1 | VPS35   | Vacuolar protei   | sp Q96QK1 VPS35_HUMAN  | 4  | 7.2  | 0.1154853 | 0.55385 | 0.9991 | -0.5623 | 0.01843 | 0.09524 | 11 | 19.3 | 0.04891 | 0.8011  | 0.9973 | -0.2179 | 0.2709 | 0.3554 | 3  |
| 1192 | Q96RE7 | NACC1   | Nucleus accumbe   | sp Q96RE7 NACC1_HUMAN  | 5  | 14   | 0.2150432 | 0.52613 | 0.9984 | 0.7002  | 0.52613 | 0.99836 | 1  | 2.5  | NA      | NA      | NA     | NA      | NA     | NA     | NA |
| 1193 | Q96RP9 | GFM1    | Elongation facto  | sp Q96RP9 EFGM_HUMAN   | 5  | 7.3  | 0.2416325 | 0.63483 | 0.9984 | 0.5503  | 0.63483 | 0.99836 | 6  | 10.9 | NA      | NA      | NA     | NA      | NA     | NA     | NA |
| 1194 | Q96RS6 | NUDCD1  | NudC domain-co    | sp Q96RS6 NUDC1_HUMAN  | 4  | 9.3  | 0.1191745 | 0.57979 | 0.9984 | 0.0873  | 0.57979 | 0.99836 | 3  | 6.7  | NA      | NA      | NA     | NA      | NA     | NA     | NA |
| 1195 | Q96SQ9 | CYP2S1  | Cytochrome P45    | sp Q96SQ9 CP2S1_HUMAN  | 5  | 11.7 | 0.2294864 | 0.21315 | 0.9984 | 0.6132  | 0.21315 | 0.99836 | NA | NA   | NA      | NA      | NA     | NA      | NA     | NA     | NA |
| 1196 | Q96TA1 | FAM129B | Niban-like prote  | sp Q96TA1 NIBL1_HUMAN  | 2  | 3.6  | NA        | NA      | NA     | NA      | NA      | NA      | 3  | 4.3  | -0.5765 | NA      | NA     | NA      | NA     | NA     | NA |

|      |        |          |                    |                       |    |      |           |         |        |         |         |         |    |      |         |         |        |         |        |        |    |
|------|--------|----------|--------------------|-----------------------|----|------|-----------|---------|--------|---------|---------|---------|----|------|---------|---------|--------|---------|--------|--------|----|
| 1197 | Q99417 | MYCBP    | c-Myc-binding pr   | sp Q99417 MYCBP_HUMA  | 1  | 10.7 | NA        | NA      | NA     | NA      | NA      | NA      | 4  | 55.3 | 0.16551 | 0.78868 | 0.9991 | 0.00902 | 0.7887 | 0.9991 | NA |
| 1198 | Q99426 | TBCB     | Tubulin-folding d  | sp Q99426 TBCB_HUMAN  | 7  | 32   | -0.893884 | 0.03457 | 0.9984 | -1.3226 | 0.03457 | 0.99836 | 6  | 27   | NA      | NA      | NA     | NA      | NA     | NA     | NA |
| 1199 | Q99436 | PSMB7    | Proteasome sub     | sp Q99436 PSB7_HUMAN  | 4  | 17.7 | 0.0397289 | 0.83325 | 0.9991 | -0.2091 | 0.27693 | 0.47715 | 6  | 31.4 | -0.0727 | 0.70057 | 0.9973 | -1.1535 | #####  | 0.0003 | 4  |
| 1200 | Q99439 | CNN2     | Calponin-2         | sp Q99439 CNN2_HUMAN  | 5  | 17.2 | -0.237688 | 0.21714 | 0.9984 | -0.4055 | 0.21714 | 0.99836 | 6  | 23.3 | NA      | NA      | NA     | NA      | NA     | NA     | NA |
| 1201 | Q99459 | CDC5L    | Cell division cycl | sp Q99459 CDC5L_HUMAN | 8  | 17.3 | 0.1668139 | 0.38819 | 0.9991 | 0.4562  | 0.02725 | 0.12063 | 13 | 22.6 | 0.08994 | 0.63901 | 0.9973 | -0.4216 | 0.0393 | 0.0705 | 5  |
| 1202 | Q99460 | PSMD1    | 26S proteasome     | sp Q99460 PSMD1_HUMA  | 21 | 31.1 | -0.036131 | 0.84299 | 0.9991 | -0.1446 | 0.43222 | 0.6164  | 23 | 34.1 | -0.1189 | 0.51703 | 0.9973 | -0.0626 | 0.7318 | 0.7909 | NA |
| 1203 | Q99471 | PFDN5    | Prefoldin subuni   | sp Q99471 PFD5_HUMAN  | 3  | 26.6 | NA        | NA      | NA     | NA      | NA      | NA      | 6  | 60.4 | -0.242  | NA      | NA     | NA      | NA     | NA     | NA |
| 1204 | Q99497 | PARK7    | Protein/nucleic a  | sp Q99497 PARK7_HUMAN | 10 | 55   | 0.3623403 | 0.48157 | 0.9991 | -0.7257 | 0.16803 | 0.34234 | 15 | 76.7 | -0.7703 | 0.14486 | 0.9973 | 4.0875  | #####  | #####  | 2  |
| 1205 | Q99536 | VAT1     | Synaptic vesicle   | sp Q99536 VAT1_HUMAN  | 8  | 31.3 | 0.0713482 | 0.72702 | 0.9991 | -0.1262 | 0.5385  | 0.70183 | 7  | 26.5 | 0.32255 | 0.12752 | 0.9973 | -0.0733 | 0.7199 | 0.7823 | NA |
| 1206 | Q99543 | DNAJC2   | DnaJ homolog su    | sp Q99543 DNJC2_HUMAN | 4  | 7.2  | -0.261967 | NA      | NA     | NA      | NA      | NA      | 3  | 5.6  | NA      | NA      | NA     | NA      | NA     | NA     | NA |
| 1207 | Q99584 | S100A13  | Protein S100-A13   | sp Q99584 S10AD_HUMAN | 4  | 40.8 | 0.2059173 | 0.30262 | 0.9984 | -0.5218 | 0.30262 | 0.99836 | 5  | 48   | NA      | NA      | NA     | NA      | NA     | NA     | NA |
| 1208 | Q99615 | DNAJC7   | DnaJ homolog su    | sp Q99615 DNJC7_HUMAN | 9  | 18   | 0.2285936 | 0.45004 | 0.9991 | 0.1098  | 0.71491 | 0.84478 | 9  | 21.5 | -0.1617 | 0.59153 | 0.9973 | -1.2291 | 0.0007 | 0.0024 | 4  |
| 1209 | Q99623 | PHB2     | Prohibitin-2       | sp Q99623 PHB2_HUMAN  | 13 | 44.1 | 0.1807574 | 0.5078  | 0.9991 | 1.0549  | 0.0011  | 0.02437 | 14 | 51.8 | -0.0019 | 0.99453 | 0.9973 | 0.92268 | 0.0032 | 0.0084 | 1  |
| 1210 | Q99714 | HSD17B10 | 3-hydroxyacyl-Co   | sp Q99714 HCD2_HUMAN  | 3  | 19.2 | -0.028379 | 0.90412 | 0.9991 | 0.8237  | 0.02147 | 0.10155 | 8  | 50.6 | -0.68   | 0.02035 | 0.9973 | 1.06139 | 0.0007 | 0.0024 | 1  |
| 1211 | Q99729 | HNRNPAB  | Heterogeneous      | sp Q99729 ROAA_HUMAN  | 8  | 22.6 | -0.039623 | 0.89929 | 0.9991 | 0.7001  | 0.03864 | 0.14651 | 9  | 25   | -2.1319 | 0.00022 | 0.1542 | 1.31441 | 0.0007 | 0.0024 | 1  |
| 1212 | Q99733 | NAP1L4   | Nucleosome asse    | sp Q99733 NP1L4_HUMAN | 9  | 31.5 | -0.019484 | 0.91631 | 0.999  | -0.7898 | 0.91631 | 0.99899 | 11 | 36.5 | NA      | NA      | NA     | NA      | NA     | NA     | NA |
| 1213 | Q99747 | NAPG     | Gamma-soluble      | sp Q99747 SNAG_HUMAN  | 1  | 3.2  | NA        | NA      | NA     | NA      | NA      | NA      | 6  | 22.1 | 0.04934 | 0.80947 | 0.9991 | -0.6856 | 0.8095 | 0.9991 | NA |
| 1214 | Q99798 | ACO2     | Aconitate hydra    | sp Q99798 ACON_HUMAN  | 15 | 28.1 | 0.0654693 | 0.77402 | 0.9991 | 0.7492  | 0.00405 | 0.03837 | 15 | 26.9 | 0.17285 | 0.45187 | 0.9973 | -0.2039 | 0.3766 | 0.4717 | 5  |
| 1215 | Q99808 | SLC29A1  | Equilibrative nu   | sp Q99808 S29A1_HUMAN | 2  | 6.6  | 0.0017254 | 0.99454 | 0.999  | 1.0218  | 0.99454 | 0.99899 | NA | NA   | NA      | NA      | NA     | NA      | NA     | NA     | NA |
| 1216 | Q99832 | CC77     | T-complex protei   | sp Q99832 TCPH_HUMAN  | 20 | 47.7 | 0.0463774 | 0.84132 | 0.9991 | -0.4541 | 0.06336 | 0.20018 | 24 | 57.1 | #####   | 0.9997  | 0.9997 | -0.378  | 0.1164 | 0.1782 | NA |
| 1217 | Q99848 | EBNA1BP2 | Probable rRNA-p    | sp Q99848 EBP2_HUMAN  | 1  | 2.9  | NA        | NA      | NA     | NA      | NA      | NA      | 8  | 27.1 | NA      | NA      | NA     | 2.42736 | NA     | NA     | NA |
| 1218 | Q99873 | PRMT1    | Protein arginine   | sp Q99873 ANM1_HUMAN  | 16 | 47.2 | 0.2275069 | 0.35544 | 0.9991 | -0.6254 | 0.01854 | 0.09524 | 13 | 40.7 | -0.1565 | 0.52207 | 0.9973 | -0.8853 | 0.0019 | 0.0054 | 3  |
| 1219 | Q99961 | SH3GL1   | Endophilin-A2      | sp Q99961 SH3G1_HUMAN | 4  | 13.9 | -0.203203 | NA      | NA     | NA      | NA      | NA      | 12 | 42.9 | -0.261  | 0.66258 | 0.9991 | 1.33415 | 0.6626 | 0.9991 | NA |
| 1220 | Q9BPW8 | NIPSNAP1 | Protein NipSnap    | sp Q9BPW8 NIPS1_HUMAN | 2  | 6.3  | -0.425874 | NA      | NA     | NA      | NA      | NA      | 5  | 24.6 | NA      | NA      | NA     | NA      | NA     | NA     | NA |
| 1221 | Q9BQE3 | TUBA1C   | Tubulin alpha-1C   | sp Q9BQE3 TBA1C_HUMAN | 17 | 45.4 | 0.5433191 | 0.19242 | 0.9991 | -0.4075 | 0.42986 | 0.6164  | 26 | 65.9 | 0.46715 | 0.20911 | 0.9973 | -0.1337 | 0.7117 | 0.7775 | NA |
| 1222 | Q9BQI0 | AIF1L    | Allograft inflam   | sp Q9BQI0 AIF1L_HUMAN | 5  | 38   | 0.0805194 | 0.77987 | 0.9984 | 0.1942  | 0.77987 | 0.99836 | NA | NA   | NA      | NA      | NA     | NA      | NA     | NA     | NA |
| 1223 | Q9BRA2 | TXND17   | Thioredoxin dom    | sp Q9BRA2 TXD17_HUMAN | 4  | 33.3 | 0.6906899 | 0.25283 | 0.9984 | 0.7568  | 0.25283 | 0.99836 | 4  | 37.4 | NA      | NA      | NA     | NA      | NA     | NA     | NA |
| 1224 | Q9BRK5 | SDF4     | 45 kDa calcium-b   | sp Q9BRK5 CAB45_HUMAN | 3  | 13.8 | NA        | NA      | NA     | NA      | NA      | NA      | 5  | 15.2 | 0.21153 | 0.60427 | 0.9991 | 0.40203 | 0.6043 | 0.9991 | NA |
| 1225 | Q9BRP8 | PYM1     | Partner of Y14 a   | sp Q9BRP8 PYM1_HUMAN  | 5  | 33.8 | -0.227622 | 0.56137 | 0.9991 | 0.0836  | 0.83027 | 0.9155  | 6  | 40.2 | -0.011  | 0.98166 | 0.9973 | 1.2145  | 0.0129 | 0.0275 | 1  |
| 1226 | Q9BRX8 | PRXL2A   | Peroxioredoxin-li  | sp Q9BRX8 PXL2A_HUMAN | 4  | 20.1 | 0.4684302 | 0.32529 | 0.9984 | 0.4077  | 0.32529 | 0.99836 | 4  | 20.1 | NA      | NA      | NA     | NA      | NA     | NA     | NA |
| 1227 | Q9BSJ8 | ESYT1    | Extended synapt    | sp Q9BSJ8 ESYT1_HUMAN | 7  | 9.4  | -0.367492 | 0.11722 | 0.9984 | 0.0959  | 0.11722 | 0.99836 | 8  | 10.7 | NA      | NA      | NA     | -0.5125 | NA     | NA     | NA |
| 1228 | Q9BT09 | CNPY3    | Protein canopy l   | sp Q9BT09 CNPY3_HUMAN | 3  | 14   | -0.352693 | 0.40913 | 0.9984 | -0.4169 | 0.40913 | 0.99836 | 4  | 19.8 | NA      | NA      | NA     | NA      | NA     | NA     | NA |
| 1229 | Q9BT78 | COP54    | COP9 signalosom    | sp Q9BT78 CSN4_HUMAN  | 4  | 13.5 | 0.3037698 | 0.34395 | 0.9991 | -0.272  | 0.45946 | 0.6439  | 13 | 43.8 | -0.1343 | 0.52561 | 0.9973 | 0.17412 | 0.4134 | 0.5071 | NA |
| 1230 | Q9BTT0 | ANP32E   | Acidic leucine-ri  | sp Q9BTT0 AN32E_HUMAN | 4  | 29.1 | 0.407071  | NA      | NA     | NA      | NA      | NA      | 7  | 40.3 | -0.1631 | 0.72873 | 0.9991 | 2.25718 | 0.7287 | 0.9991 | NA |
| 1231 | Q9BUF5 | TUBB6    | Tubulin beta-6 c   | sp Q9BUF5 TBB6_HUMAN  | 8  | 21.5 | NA        | NA      | NA     | NA      | NA      | NA      | 17 | 50.4 | NA      | NA      | NA     | -0.8677 | NA     | NA     | NA |
| 1232 | Q9BUJ2 | HNRNPUL1 | Heterogeneous      | sp Q9BUJ2 HNRL1_HUMAN | 7  | 10   | -0.166797 | 0.52113 | 0.9991 | 0.426   | 0.113   | 0.27928 | 8  | 11.3 | 0.55257 | 0.04486 | 0.9973 | 0.31081 | 0.2391 | 0.3235 | 1  |
| 1233 | Q9BUL8 | PDCD10   | Programmed cel     | sp Q9BUL8 PDC10_HUMAN | 2  | 17   | 0.0628339 | NA      | NA     | NA      | NA      | NA      | 2  | 11.8 | NA      | NA      | NA     | NA      | NA     | NA     | NA |
| 1234 | Q9BUQ8 | DDX23    | Probable ATP-de    | sp Q9BUQ8 DDX23_HUMA  | 3  | 5.5  | NA        | NA      | NA     | NA      | NA      | NA      | 8  | 12.4 | -0.1695 | NA      | NA     | NA      | NA     | NA     | NA |
| 1235 | Q9BV38 | WDR18    | WD repeat-cont     | sp Q9BV38 WDR18_HUMA  | 2  | 4.9  | -0.987723 | 0.07638 | 0.9984 | -0.1668 | 0.07638 | 0.99836 | NA | NA   | NA      | NA      | NA     | NA      | NA     | NA     | NA |
| 1236 | Q9BV40 | VAMP8    | Vesicle-associat   | sp Q9BV40 VAMP8_HUMA  | 2  | 22   | NA        | NA      | NA     | NA      | NA      | NA      | 2  | 22   | 0.37951 | NA      | NA     | NA      | NA     | NA     | NA |
| 1237 | Q9BVA1 | TUBB2B   | Tubulin beta-2B    | sp Q9BVA1 TBB2B_HUMAN | 14 | 39.1 | -0.025757 | 0.92245 | 0.999  | -1.1142 | 0.92245 | 0.99899 | 22 | 71.7 | NA      | NA      | NA     | NA      | NA     | NA     | NA |
| 1238 | Q9BVG4 | PBDC1    | Protein PBDC1      | sp Q9BVG4 PBDC1_HUMAN | 7  | 30.5 | 0.0294416 | NA      | NA     | NA      | NA      | NA      | 4  | 20.6 | 0.3939  | NA      | NA     | NA      | NA     | NA     | NA |
| 1239 | Q9BW27 | NUP85    | Nuclear pore cor   | sp Q9BW27 NUP85_HUMAN | 2  | 3.2  | -0.148411 | 0.71954 | 0.9984 | 0.5194  | 0.71954 | 0.99836 | 3  | 6.1  | NA      | NA      | NA     | NA      | NA     | NA     | NA |
| 1240 | Q9BWD1 | ACAT2    | Acetyl-CoA acet    | sp Q9BWD1 THIC_HUMAN  | 6  | 22.7 | -0.10872  | 0.55354 | 0.9984 | -0.2321 | 0.55354 | 0.99836 | NA | NA   | NA      | NA      | NA     | NA      | NA     | NA     | NA |
| 1241 | Q9BWF3 | RBM4     | RNA-binding pro    | sp Q9BWF3 RBM4_HUMAN  | 7  | 25.8 | -0.084428 | 0.75078 | 0.9984 | 0.6208  | 0.75078 | 0.99836 | 11 | 34.6 | NA      | NA      | NA     | 2.5035  | NA     | NA     | NA |
| 1242 | Q9BWU0 | SLC4A1AP | Kanadaplin         | sp Q9BWU0 NADAP_HUM   | 3  | 5.8  | -0.06404  | NA      | NA     | NA      | NA      | NA      | 1  | 1.1  | NA      | NA      | NA     | NA      | NA     | NA     | NA |
| 1243 | Q9BXJ9 | NAA15    | N-alpha-acetyltr   | sp Q9BXJ9 NAA15_HUMAN | 14 | 16.6 | 0.275592  | 0.29552 | 0.9984 | -0.0731 | 0.29552 | 0.99836 | 16 | 22.2 | NA      | NA      | NA     | NA      | NA     | NA     | NA |
| 1244 | Q9BXP5 | SRRT     | Serrate RNA eff    | sp Q9BXP5 SRRT_HUMAN  | 10 | 13.1 | 0.0011983 | 0.99726 | 0.9991 | 0.5325  | 0.14188 | 0.30951 | 13 | 18.9 | 0.18983 | 0.54616 | 0.9973 | -0.406  | 0.2062 | 0.2935 | NA |

|      |        |         |                   |                       |    |      |           |         |        |         |         |         |    |      |         |         |        |         |        |        |    |
|------|--------|---------|-------------------|-----------------------|----|------|-----------|---------|--------|---------|---------|---------|----|------|---------|---------|--------|---------|--------|--------|----|
| 1245 | Q9BY44 | EIF2A   | Eukaryotic trans  | sp Q9BY44 EIF2A_HUMAN | 5  | 12.3 | -0.048683 | 0.81019 | 0.9984 | -0.296  | 0.81019 | 0.99836 | 10 | 25.5 | NA      | NA      | NA     | NA      | NA     | NA     | NA |
| 1246 | Q9BYD6 | MRPL1   | 39S ribosomal p   | sp Q9BYD6 RM01_HUMAN  | 4  | 20.6 | 0.8998424 | 0.01195 | 0.9984 | 0.8195  | 0.01195 | 0.99836 | 4  | 20.6 | NA      | NA      | NA     | NA      | NA     | NA     | NA |
| 1247 | Q9BYG3 | NIFK    | MKI67 FHA dom     | sp Q9BYG3 MK67I_HUMAN | 5  | 25.3 | -0.075029 | 0.85373 | 0.9984 | 0.2118  | 0.85373 | 0.99836 | 4  | 20.1 | NA      | NA      | NA     | NA      | NA     | NA     | NA |
| 1248 | Q9BYT8 | NLN     | Neurolysin, mitc  | sp Q9BYT8 NEUL_HUMAN  | 7  | 12.4 | 0.3859671 | 0.04775 | 0.9984 | 0.0753  | 0.04775 | 0.99836 | 9  | 15.1 | NA      | NA      | NA     | NA      | NA     | NA     | NA |
| 1249 | Q9BZE4 | GTPBP4  | Nucleolar GTP-b   | sp Q9BZE4 NOG1_HUMAN  | 5  | 6.6  | 0.0667243 | 0.76588 | 0.9984 | 0.3158  | 0.76588 | 0.99836 | 9  | 16.1 | 0.13874 | NA      | NA     | NA      | NA     | NA     | NA |
| 1250 | Q9BZX2 | UCK2    | Uridine-cytidine  | sp Q9BZX2 UCK2_HUMAN  | 2  | 8.4  | NA        | NA      | NA     | NA      | NA      | NA      | 5  | 33   | -0.157  | NA      | NA     | NA      | NA     | NA     | NA |
| 1251 | Q9BZZ5 | API5    | Apoptosis inhibi  | sp Q9BZZ5 API5_HUMAN  | 6  | 10.7 | 0.0493187 | 0.83891 | 0.9991 | 0.0122  | 0.96416 | 0.97378 | 10 | 23.5 | 0.24834 | 0.31393 | 0.9973 | 0.12298 | 0.6135 | 0.7016 | NA |
| 1252 | Q9C005 | DPY30   | Protein dpy-30    | sp Q9C005 DPY30_HUMAN | 2  | 36.4 | -0.023023 | 0.91853 | 0.999  | 0.5702  | 0.91853 | 0.99899 | 4  | 74.7 | NA      | NA      | NA     | NA      | NA     | NA     | NA |
| 1253 | Q9C0C9 | UBE2O   | (E3-independent   | sp Q9C0C9 UBE2O_HUMAN | 7  | 7.3  | 0.3194222 | NA      | NA     | NA      | NA      | NA      | 4  | 4.3  | NA      | NA      | NA     | NA      | NA     | NA     | NA |
| 1254 | Q9GZL7 | WDR12   | Ribosome biogen   | sp Q9GZL7 WDR12_HUMAN | 4  | 11.3 | -0.087022 | 0.79345 | 0.9991 | -0.2826 | 0.52888 | 0.6944  | 8  | 25.8 | -0.073  | 0.80586 | 0.9973 | 0.53834 | 0.0869 | 0.1427 | NA |
| 1255 | Q9GZR7 | DDX24   | ATP-dependent     | sp Q9GZR7 DDX24_HUMAN | 4  | 5.9  | -0.011918 | 0.982   | 0.999  | 0.3602  | 0.982   | 0.99899 | 6  | 8.3  | NA      | NA      | NA     | NA      | NA     | NA     | NA |
| 1256 | Q9GZS3 | WDR61   | WD repeat-cont    | sp Q9GZS3 WDR61_HUMAN | 3  | 14.8 | NA        | NA      | NA     | NA      | NA      | NA      | 8  | 46.6 | 0.14684 | 0.55705 | 0.9991 | 0.39535 | 0.557  | 0.9991 | NA |
| 1257 | Q9GZT3 | SLIRP   | SRA stem-loop-i   | sp Q9GZT3 SLIRP_HUMAN | 2  | 22   | 0.2029317 | 0.62207 | 0.9984 | 0.5265  | 0.62207 | 0.99836 | 8  | 69.7 | NA      | NA      | NA     | NA      | NA     | NA     | NA |
| 1258 | Q9GZZ1 | NAA50   | N-alpha-acetyltr  | sp Q9GZZ1 NAA50_HUMAN | 3  | 17.8 | 0.0318623 | 0.9027  | 0.9991 | -0.6031 | 0.03163 | 0.12742 | 7  | 47.9 | 0.14329 | 0.58417 | 0.9973 | 1.06896 | 0.0007 | 0.0024 | 2  |
| 1259 | Q9H0A0 | NAT10   | RNA cytidine ac   | sp Q9H0A0 NAT10_HUMAN | 7  | 8.6  | 0.1327551 | 0.65647 | 0.9984 | 0.5977  | 0.65647 | 0.99836 | 8  | 12.5 | NA      | NA      | NA     | NA      | NA     | NA     | NA |
| 1260 | Q9H0D6 | XRN2    | 5-3 exoribonucle  | sp Q9H0D6 XRN2_HUMAN  | 6  | 8.4  | -0.419695 | 0.18225 | 0.9984 | 0.4386  | 0.18225 | 0.99836 | 7  | 9.8  | NA      | NA      | NA     | NA      | NA     | NA     | NA |
| 1261 | Q9H0S4 | DDX47   | Probable ATP-de   | sp Q9H0S4 DDX47_HUMAN | 2  | 5.3  | NA        | NA      | NA     | NA      | NA      | NA      | 4  | 10.3 | -1.209  | 0.0157  | 0.9991 | -0.921  | 0.0157 | 0.9991 | NA |
| 1262 | Q9H0U4 | RAB1B   | Ras-related prot  | sp Q9H0U4 RAB1B_HUMAN | 7  | 48.3 | -0.017143 | 0.96045 | 0.999  | 0.4514  | 0.96045 | 0.99899 | 10 | 58.7 | NA      | NA      | NA     | NA      | NA     | NA     | NA |
| 1263 | Q9H1E3 | NUCKS1  | Nuclear ubiquitin | sp Q9H1E3 NUCKS_HUMAN | 10 | 47.3 | 0.5826035 | 0.1389  | 0.9991 | -0.2182 | 0.56419 | 0.72466 | 3  | 14.4 | -0.0332 | 0.95934 | 0.9973 | 1.62726 | 0.0085 | 0.0191 | 2  |
| 1264 | Q9H223 | EHD4    | EH domain-conta   | sp Q9H223 EHD4_HUMAN  | 2  | 4.8  | NA        | NA      | NA     | NA      | NA      | NA      | 8  | 17   | -0.2757 | 0.28943 | 0.9991 | -1.4089 | 0.2894 | 0.9991 | NA |
| 1265 | Q9H2U2 | PPA2    | Inorganic pyroph  | sp Q9H2U2 IPYR2_HUMAN | 3  | 12.3 | 0.0664253 | 0.77111 | 0.9984 | 0.1515  | 0.77111 | 0.99836 | 7  | 29.3 | NA      | NA      | NA     | NA      | NA     | NA     | NA |
| 1266 | Q9H307 | PNN     | Pinin             | sp Q9H307 PININ_HUMAN | 10 | 14.8 | 0.563627  | 0.17324 | 0.9984 | 1.5058  | 0.17324 | 0.99836 | 7  | 9.8  | NA      | NA      | NA     | NA      | NA     | NA     | NA |
| 1267 | Q9H3K6 | BOLA2   | Bola-like protein | sp Q9H3K6 BOLA2_HUMAN | 2  | 29.1 | -0.044878 | 0.88102 | 0.9984 | -0.4237 | 0.88102 | 0.99836 | 5  | 69.8 | NA      | NA      | NA     | NA      | NA     | NA     | NA |
| 1268 | Q9H3N1 | TMX1    | Thioredoxin-rela  | sp Q9H3N1 TMX1_HUMAN  | 6  | 17.9 | 0.1897915 | 0.52877 | 0.9984 | 0.6494  | 0.52877 | 0.99836 | 3  | 12.1 | NA      | NA      | NA     | NA      | NA     | NA     | NA |
| 1269 | Q9H444 | CHMP4B  | Charged multive   | sp Q9H444 CHM4B_HUMAN | 6  | 30.4 | -0.078797 | 0.86691 | 0.9991 | -0.9329 | 0.12329 | 0.28797 | 6  | 37.9 | -0.0768 | 0.84156 | 0.9973 | 0.6386  | 0.1145 | 0.1757 | NA |
| 1270 | Q9H4A4 | RNPEP   | Aminopeptidase    | sp Q9H4A4 AMPB_HUMAN  | 3  | 6    | 0.0130021 | NA      | NA     | NA      | NA      | NA      | 10 | 20.8 | NA      | NA      | NA     | NA      | NA     | NA     | NA |
| 1271 | Q9H4M9 | EHD1    | EH domain-conta   | sp Q9H4M9 EHD1_HUMAN  | 1  | 2.1  | NA        | NA      | NA     | NA      | NA      | NA      | 8  | 22.3 | -0.2344 | 0.4652  | 0.9991 | -0.3626 | 0.4652 | 0.9991 | NA |
| 1272 | Q9H583 | HEATR1  | HEAT repeat-cor   | sp Q9H583 HEAT1_HUMAN | 6  | 3.7  | -0.071316 | 0.7329  | 0.9984 | 0.1862  | 0.7329  | 0.99836 | 7  | 3.7  | NA      | NA      | NA     | 0.22617 | NA     | NA     | NA |
| 1273 | Q9H6T3 | RPAP3   | RNA polymerase    | sp Q9H6T3 RPAP3_HUMAN | 5  | 9.8  | 0.0423898 | 0.89621 | 0.9984 | -0.1405 | 0.89621 | 0.99836 | 4  | 8    | NA      | NA      | NA     | NA      | NA     | NA     | NA |
| 1274 | Q9H6Z4 | RANBP3  | Ran-binding prot  | sp Q9H6Z4 RANB3_HUMAN | 3  | 6.3  | -0.018604 | 0.93592 | 0.999  | -0.6431 | 0.93592 | 0.99899 | 4  | 9.5  | NA      | NA      | NA     | NA      | NA     | NA     | NA |
| 1275 | Q9H7Z7 | PTGES2  | Prostaglandin E   | sp Q9H7Z7 PGES2_HUMAN | 3  | 6.4  | NA        | NA      | NA     | 0.4841  | NA      | NA      | 2  | 7.4  | NA      | NA      | NA     | NA      | NA     | NA     | NA |
| 1276 | Q9H8Y8 | GORASP2 | Golgi reassembl   | sp Q9H8Y8 GORS2_HUMAN | 4  | 10.8 | -0.329845 | 0.21242 | 0.9984 | -0.6932 | 0.21242 | 0.99836 | 4  | 12.2 | NA      | NA      | NA     | NA      | NA     | NA     | NA |
| 1277 | Q9H910 | JPT2    | Jupiter microtub  | sp Q9H910 JUPI2_HUMAN | 7  | 48.9 | 0.3338711 | 0.456   | 0.9984 | -0.569  | 0.456   | 0.99836 | 6  | 41.6 | NA      | NA      | NA     | NA      | NA     | NA     | NA |
| 1278 | Q9H9B4 | SFXN1   | Sideroflexin-1    | sp Q9H9B4 SFXN1_HUMAN | 3  | 12.7 | 0.1874228 | 0.3366  | 0.9984 | 0.4357  | 0.3366  | 0.99836 | 3  | 13   | NA      | NA      | NA     | NA      | NA     | NA     | NA |
| 1279 | Q9H9Z2 | LN28A   | Protein lin-28 ho | sp Q9H9Z2 LN28A_HUMAN | 12 | 58.4 | 0.0513984 | 0.76893 | 0.9984 | -0.2414 | 0.76893 | 0.99836 | NA | NA   | NA      | NA      | NA     | NA      | NA     | NA     | NA |
| 1280 | Q9HAV4 | XPO5    | Exportin-5        | sp Q9HAV4 XPO5_HUMAN  | 7  | 8.7  | -0.174203 | 0.33416 | 0.9984 | -0.1273 | 0.33416 | 0.99836 | 16 | 19.5 | NA      | NA      | NA     | NA      | NA     | NA     | NA |
| 1281 | Q9HAV7 | GRPEL1  | GrpE protein ho   | sp Q9HAV7 GRPE1_HUMAN | 3  | 20.3 | 0.2842111 | 0.27504 | 0.9984 | 0.9215  | 0.27504 | 0.99836 | 5  | 28.6 | 0.25439 | NA      | NA     | NA      | NA     | NA     | NA |
| 1282 | Q9HB71 | CACYBP  | Calcydin-binding  | sp Q9HB71 CYBP_HUMAN  | 11 | 39   | 0.0499102 | 0.8011  | 0.9991 | -0.3637 | 0.08006 | 0.22981 | 13 | 56.1 | 0.07822 | 0.69341 | 0.9973 | 0.91325 | 0.0002 | 0.001  | 2  |
| 1283 | Q9HC07 | TMEM165 | Transmembrane     | sp Q9HC07 TM165_HUMAN | 3  | 19.4 | 0.2195471 | 0.46457 | 0.9984 | 0.473   | 0.46457 | 0.99836 | 1  | 5.6  | NA      | NA      | NA     | NA      | NA     | NA     | NA |
| 1284 | Q9HC38 | GLOD4   | Glyoxalase doma   | sp Q9HC38 GLOD4_HUMAN | 5  | 16.9 | 0.1746621 | 0.53803 | 0.9984 | -0.2731 | 0.53803 | 0.99836 | 5  | 17.3 | NA      | NA      | NA     | NA      | NA     | NA     | NA |
| 1285 | Q9HCE1 | MOV10   | Helicase MOV-1    | sp Q9HCE1 MOV10_HUMAN | 2  | 2.8  | 0.1136047 | 0.78263 | 0.9984 | 0.1374  | 0.78263 | 0.99836 | NA | NA   | NA      | NA      | NA     | NA      | NA     | NA     | NA |
| 1286 | Q9HCN8 | SDF2L1  | Stromal cell-der  | sp Q9HCN8 SDF2L_HUMAN | 1  | 5.4  | NA        | NA      | NA     | NA      | NA      | NA      | 5  | 27.1 | 0.48174 | NA      | NA     | NA      | NA     | NA     | NA |
| 1287 | Q9HD45 | TM9SF3  | Transmembrane     | sp Q9HD45 TM9S3_HUMAN | 3  | 5.8  | -1.043374 | 0.04896 | 0.9991 | 1.172   | 0.03119 | 0.12742 | 3  | 7.5  | 0.11053 | 0.71498 | 0.9973 | 0.07785 | 0.7966 | 0.8355 | 5  |
| 1288 | Q9NP72 | RAB18   | Ras-related prot  | sp Q9NP72 RAB18_HUMAN | 5  | 32   | 0.387441  | 0.13475 | 0.9991 | -0.1616 | 0.51986 | 0.6877  | 4  | 27.2 | 0.02959 | 0.89452 | 0.9973 | -0.3793 | 0.104  | 0.1635 | NA |
| 1289 | Q9NP97 | DYNLRB1 | Dynein light cha  | sp Q9NP97 DLRB1_HUMAN | 4  | 57.3 | 0.5463025 | NA      | NA     | NA      | NA      | NA      | 4  | 59.4 | NA      | NA      | NA     | NA      | NA     | NA     | NA |
| 1290 | Q9NPA8 | ENY2    | Transcription ac  | sp Q9NPA8 ENY2_HUMAN  | 1  | 16.8 | NA        | NA      | NA     | NA      | NA      | NA      | 1  | 16.8 | NA      | NA      | NA     | NA      | NA     | NA     | NA |
| 1291 | Q9NPJ3 | ACOT13  | Acyl-coenzyme A   | sp Q9NPJ3 ACO13_HUMAN | 3  | 30.7 | 0.4240398 | 0.20041 | 0.9984 | 0.9338  | 0.20041 | 0.99836 | 3  | 25   | NA      | NA      | NA     | NA      | NA     | NA     | NA |
| 1292 | Q9NQC3 | RTN4    | Reticulon-4       | sp Q9NQC3 RTN4_HUMAN  | 11 | 14.5 | -0.157925 | 0.39688 | 0.9984 | 0.3172  | 0.39688 | 0.99836 | 7  | 8.6  | NA      | NA      | NA     | 0.28559 | NA     | NA     | NA |

|      |        |         |                                            |                       |    |      |           |         |        |         |         |         |    |      |         |         |        |         |        |        |    |    |
|------|--------|---------|--------------------------------------------|-----------------------|----|------|-----------|---------|--------|---------|---------|---------|----|------|---------|---------|--------|---------|--------|--------|----|----|
| 1293 | Q9NQP4 | PFDN4   | Prefoldin subunit 4                        | sp Q9NQP4 PFD4_HUMAN  | 2  | 20.1 | -0.131648 | NA      | NA     | NA      | NA      | NA      | 2  | 20.1 | NA      | NA      | NA     | NA      | NA     | NA     | NA | NA |
| 1294 | Q9NQW6 | ANLN    | Anillin                                    | sp Q9NQW6 ANLN_HUMAN  | 2  | 2.7  | -0.206792 | 0.64071 | 0.9984 | 0.8984  | 0.64071 | 0.99836 | 2  | 3.2  | NA      | NA      | NA     | NA      | NA     | NA     | NA | NA |
| 1295 | Q9NQW7 | XPNPEP1 | Xaa-Pro aminopeptidase                     | sp Q9NQW7 XPP1_HUMAN  | 1  | 1.8  | NA        | NA      | NA     | NA      | NA      | NA      | 6  | 11.9 | -0.0229 | 0.89706 | 0.9991 | -0.4138 | 0.8971 | 0.9991 | NA | NA |
| 1296 | Q9NR30 | DDX21   | Nucleolar RNA helicase                     | sp Q9NR30 DDX21_HUMAN | 27 | 37.8 | 0.0908945 | 0.82686 | 0.9991 | 0.9905  | 0.02739 | 0.12063 | 27 | 43   | -0.2239 | 0.59144 | 0.9973 | 2.28611 | #####  | 0.0002 | 1  | 1  |
| 1297 | Q9NR31 | SAR1A   | GTP-binding protein                        | sp Q9NR31 SAR1A_HUMAN | 4  | 26.8 | 0.1287896 | 0.59325 | 0.9991 | -0.8872 | 0.00417 | 0.03837 | 6  | 42.9 | 0.11216 | 0.64142 | 0.9973 | -0.6358 | 0.0164 | 0.0343 | 3  | 3  |
| 1298 | Q9NR45 | NANS    | Sialic acid synthase                       | sp Q9NR45 SIAS_HUMAN  | 4  | 14.5 | 0.2111359 | NA      | NA     | NA      | NA      | NA      | 3  | 12.8 | -0.1174 | 0.70191 | 0.9991 | -1.3135 | 0.7019 | 0.9991 | NA | NA |
| 1299 | Q9NR50 | EIF2B3  | Translation initiation factor              | sp Q9NR50 EI2BG_HUMAN | 4  | 12.6 | NA        | NA      | NA     | NA      | NA      | NA      | 7  | 22.6 | -0.04   | NA      | NA     | NA      | NA     | NA     | NA | NA |
| 1300 | Q9NRF8 | CTPS2   | CTP synthase 2                             | sp Q9NRF8 PYRG2_HUMAN | 3  | 5.6  | -0.313466 | NA      | NA     | NA      | NA      | NA      | 5  | 9.9  | NA      | NA      | NA     | NA      | NA     | NA     | NA | NA |
| 1301 | Q9NRV9 | HEBP1   | Heme-binding protein                       | sp Q9NRV9 HEBP1_HUMAN | 1  | 11.1 | NA        | NA      | NA     | NA      | NA      | NA      | 2  | 19   | -0.0594 | NA      | NA     | NA      | NA     | NA     | NA | NA |
| 1302 | Q9NRZ9 | HELLS   | Lymphoid-specific histone H1               | sp Q9NRZ9 HELLS_HUMAN | 6  | 7.2  | 0.2950048 | 0.25493 | 0.9984 | 0.6218  | 0.25493 | 0.99836 | NA | NA   | NA      | NA      | NA     | NA      | NA     | NA     | NA | NA |
| 1303 | Q9NS69 | TOMM22  | Mitochondrial inner membrane protein       | sp Q9NS69 TOM22_HUMAN | 4  | 52.1 | 0.0007118 | 0.99692 | 0.999  | 0.5523  | 0.99692 | 0.99899 | 2  | 16.2 | NA      | NA      | NA     | NA      | NA     | NA     | NA | NA |
| 1304 | Q9NSD9 | FARSB   | Phenylalanine-tRNA synthetase              | sp Q9NSD9 SYFB_HUMAN  | 8  | 12.9 | -0.033947 | 0.91447 | 0.9991 | 0.1539  | 0.73118 | 0.85314 | 12 | 23.1 | -0.0186 | 0.95302 | 0.9973 | 0.78753 | 0.0234 | 0.0458 | 1  | 1  |
| 1305 | Q9NSE4 | IARS2   | Isoleucine-tRNA synthetase                 | sp Q9NSE4 SYIM_HUMAN  | 4  | 6.2  | -0.093703 | 0.71101 | 0.9984 | 0.9706  | 0.71101 | 0.99836 | 5  | 7.4  | -0.2907 | NA      | NA     | NA      | NA     | NA     | NA | NA |
| 1306 | Q9NT62 | ATG3    | Ubiquitin-like-conjugating enzyme          | sp Q9NT62 ATG3_HUMAN  | 2  | 7.3  | -0.092533 | NA      | NA     | NA      | NA      | NA      | 2  | 7.3  | NA      | NA      | NA     | NA      | NA     | NA     | NA | NA |
| 1307 | Q9NTJ3 | SMC4    | Structural maintenance of chromosomes      | sp Q9NTJ3 SMC4_HUMAN  | 19 | 16.5 | -0.066605 | 0.80275 | 0.9984 | 0.3618  | 0.80275 | 0.99836 | 5  | 4.6  | NA      | NA      | NA     | NA      | NA     | NA     | NA | NA |
| 1308 | Q9NTJ5 | SACM1L  | Phosphatidylinositol 3-kinase              | sp Q9NTJ5 SAC1_HUMAN  | 6  | 10.4 | -0.396494 | 0.36397 | 0.9984 | 0.4419  | 0.36397 | 0.99836 | NA | NA   | NA      | NA      | NA     | NA      | NA     | NA     | NA | NA |
| 1309 | Q9NTK5 | OLA1    | Obg-like ATPase                            | sp Q9NTK5 OLA1_HUMAN  | 8  | 20.7 | -0.056454 | 0.7743  | 0.9991 | -0.7904 | 0.00083 | 0.02112 | 13 | 31.8 | 0.0587  | 0.76561 | 0.9973 | -0.3962 | 0.0572 | 0.0984 | 3  | 3  |
| 1310 | Q9NU22 | MDN1    | Midasin                                    | sp Q9NU22 MDN1_HUMAN  | 14 | 3.5  | 0.12779   | 0.74939 | 0.9984 | 1.024   | 0.74939 | 0.99836 | 3  | 0.7  | 0.07994 | NA      | NA     | NA      | NA     | NA     | NA | NA |
| 1311 | Q9NUQ3 | TXLNG   | Gamma-taxilin                              | sp Q9NUQ3 TXLNG_HUMAN | 6  | 13.8 | 0.2478033 | 0.23917 | 0.9984 | -0.358  | 0.23917 | 0.99836 | 2  | 3.6  | NA      | NA      | NA     | NA      | NA     | NA     | NA | NA |
| 1312 | Q9NUQ9 | FAM49B  | Protein FAM49B                             | sp Q9NUQ9 FA49B_HUMAN | 5  | 19.8 | 0.390761  | NA      | NA     | NA      | NA      | NA      | 7  | 28.1 | 0.26613 | 0.31655 | 0.9991 | -0.3978 | 0.3165 | 0.9991 | NA | NA |
| 1313 | Q9NUU7 | DDX19A  | ATP-dependent RNA helicase                 | sp Q9NUU7 DD19A_HUMAN | 7  | 16.7 | 0.403169  | NA      | NA     | NA      | NA      | NA      | 8  | 20.3 | -0.2489 | 0.3926  | 0.9991 | -0.0358 | 0.3926 | 0.9991 | NA | NA |
| 1314 | Q9NVA2 | Sept-11 | Septin-11                                  | sp Q9NVA2 SEP11_HUMAN | 7  | 17   | 0.0176473 | NA      | NA     | NA      | NA      | NA      | 12 | 35.4 | 0.48768 | 0.11965 | 0.9991 | 1.81375 | 0.1196 | 0.9991 | NA | NA |
| 1315 | Q9NVI7 | ATAD3A  | ATPase family A class 3                    | sp Q9NVI7 ATD3A_HUMAN | 4  | 8.7  | -0.253409 | 0.35172 | 0.9984 | 0.4013  | 0.35172 | 0.99836 | 5  | 7.4  | NA      | NA      | NA     | NA      | NA     | NA     | NA | NA |
| 1316 | Q9NVP1 | DDX18   | ATP-dependent RNA helicase                 | sp Q9NVP1 DDX18_HUMAN | 7  | 11.5 | 0.1326176 | 0.64201 | 0.9991 | 0.5859  | 0.05406 | 0.18164 | 12 | 24.3 | 0.04086 | 0.90657 | 0.9973 | 0.31052 | 0.3364 | 0.4262 | NA | NA |
| 1317 | Q9NVU7 | SDAD1   | Protein SDA1 homolog                       | sp Q9NVU7 SDA1_HUMAN  | 3  | 4.9  | 0.1489324 | 0.71862 | 0.9984 | 0.0869  | 0.71862 | 0.99836 | 3  | 4.5  | 0.3607  | NA      | NA     | NA      | NA     | NA     | NA | NA |
| 1318 | Q9NWH9 | SLTM    | SAFB-like transcription factor             | sp Q9NWH9 SLTM_HUMAN  | 5  | 6.4  | 0.2573606 | 0.50282 | 0.9984 | 0.9943  | 0.50282 | 0.99836 | 2  | 3.2  | NA      | NA      | NA     | NA      | NA     | NA     | NA | NA |
| 1319 | Q9NWW4 | CZIB    | CXC motif containing protein               | sp Q9NWW4 CZIB_HUMAN  | 2  | 16.9 | 0.0971704 | NA      | NA     | NA      | NA      | NA      | NA | NA   | NA      | NA      | NA     | NA      | NA     | NA     | NA | NA |
| 1320 | Q9NX55 | HYPK    | Huntingtin-interacting protein             | sp Q9NX55 HYPK_HUMAN  | 3  | 14.7 | 0.5517683 | NA      | NA     | NA      | NA      | NA      | 4  | 33.3 | NA      | NA      | NA     | NA      | NA     | NA     | NA | NA |
| 1321 | Q9NX58 | LYAR    | Cell growth-regulating protein             | sp Q9NX58 LYAR_HUMAN  | 2  | 7.4  | -0.289102 | 0.38244 | 0.9984 | 1.9279  | 0.38244 | 0.99836 | 2  | 9.2  | NA      | NA      | NA     | NA      | NA     | NA     | NA | NA |
| 1322 | Q9NXG2 | THUMPD1 | THUMP domain-containing protein            | sp Q9NXG2 THUM1_HUMAN | 5  | 20.1 | 0.600099  | 0.08331 | 0.9984 | 0.2886  | 0.08331 | 0.99836 | 1  | 2.3  | NA      | NA      | NA     | NA      | NA     | NA     | NA | NA |
| 1323 | Q9NY33 | DPP3    | Dipeptidyl peptidase                       | sp Q9NY33 DPP3_HUMAN  | 6  | 10.2 | -0.289388 | NA      | NA     | NA      | NA      | NA      | 8  | 16.3 | 0.17776 | 0.67696 | 0.9991 | -1.0968 | 0.677  | 0.9991 | NA | NA |
| 1324 | Q9NYF8 | BCLAF1  | Bcl-2-associated factor                    | sp Q9NYF8 BCLF1_HUMAN | 7  | 9    | 0.1489329 | 0.76785 | 0.9991 | 0.8461  | 0.10708 | 0.27697 | 10 | 12.9 | -0.3327 | 0.51193 | 0.9973 | 0.61081 | 0.2358 | 0.3208 | NA | NA |
| 1325 | Q9NYK5 | MRPL39  | 39S ribosomal protein                      | sp Q9NYK5 RM39_HUMAN  | 4  | 12.1 | -0.396182 | 0.34522 | 0.9984 | -0.2024 | 0.34522 | 0.99836 | 4  | 12.4 | NA      | NA      | NA     | NA      | NA     | NA     | NA | NA |
| 1326 | Q9NYU2 | UGGT1   | UDP-glucose-glucosyltransferase            | sp Q9NYU2 UGGG1_HUMAN | 7  | 5.9  | -0.038585 | 0.91261 | 0.9991 | 0.2751  | 0.48868 | 0.66502 | 14 | 11.6 | 0.17982 | 0.76817 | 0.9973 | 1.30057 | 0.0211 | 0.0417 | 1  | 1  |
| 1327 | Q9NZ01 | TECR    | Very-long-chain fatty acid synthase        | sp Q9NZ01 TECR_HUMAN  | 3  | 9.1  | 0.3078784 | 0.33749 | 0.9984 | 0.6573  | 0.33749 | 0.99836 | 2  | 6.8  | NA      | NA      | NA     | NA      | NA     | NA     | NA | NA |
| 1328 | Q9NZ45 | CISD1   | CDGS iron-sulfur domain-containing protein | sp Q9NZ45 CISD1_HUMAN | 3  | 34.3 | 0.3178425 | 0.22534 | 0.9984 | 1.0661  | 0.22534 | 0.99836 | 2  | 25.9 | NA      | NA      | NA     | NA      | NA     | NA     | NA | NA |
| 1329 | Q9NZB2 | FAM120A | Constitutive active GTPase                 | sp Q9NZB2 F120A_HUMAN | 3  | 3.5  | NA        | NA      | NA     | NA      | NA      | NA      | 5  | 4.4  | -0.3966 | NA      | NA     | NA      | NA     | NA     | NA | NA |
| 1330 | Q9NZL9 | MAT2B   | Methionine adenosyltransferase             | sp Q9NZL9 MAT2B_HUMAN | 4  | 18   | NA        | NA      | NA     | -0.6856 | NA      | NA      | 4  | 12.9 | 0.15174 | 0.6432  | 0.9991 | 0.88234 | 0.6432 | 0.9991 | NA | NA |
| 1331 | Q9P016 | THYN1   | Thymocyte nuclear protein                  | sp Q9P016 THYN1_HUMAN | 6  | 25.3 | 0.3824536 | 0.04638 | 0.9984 | 0.2971  | 0.04638 | 0.99836 | 4  | 16.9 | NA      | NA      | NA     | NA      | NA     | NA     | NA | NA |
| 1332 | Q9P0L0 | VAPA    | Vesicle-associated protein                 | sp Q9P0L0 VAPA_HUMAN  | 6  | 30.5 | 0.0489447 | 0.78855 | 0.9984 | 0.4991  | 0.78855 | 0.99836 | 7  | 35.3 | NA      | NA      | NA     | NA      | NA     | NA     | NA | NA |
| 1333 | Q9P0V9 | Sept-10 | Septin-10                                  | sp Q9P0V9 SEP10_HUMAN | 5  | 15.6 | 0.2632029 | NA      | NA     | NA      | NA      | NA      | NA | NA   | NA      | NA      | NA     | NA      | NA     | NA     | NA | NA |
| 1334 | Q9P1F3 | ABRACL  | Costars family protein                     | sp Q9P1F3 ABRAL_HUMAN | 4  | 70.4 | 0.759263  | NA      | NA     | NA      | NA      | NA      | 3  | 65.4 | NA      | NA      | NA     | NA      | NA     | NA     | NA | NA |
| 1335 | Q9P258 | RCC2    | Protein RCC2                               | sp Q9P258 RCC2_HUMAN  | 13 | 37.9 | -0.081703 | 0.77804 | 0.9991 | -0.0505 | 0.86159 | 0.92074 | 13 | 33.5 | 0.35466 | 0.23105 | 0.9973 | 1.47236 | #####  | 0.0004 | 1  | 1  |
| 1336 | Q9P287 | BCCIP   | BRCA2 and CDKN1A-interacting protein       | sp Q9P287 BCCIP_HUMAN | 2  | 9.9  | 0.0507612 | 0.87576 | 0.9984 | -0.0912 | 0.87576 | 0.99836 | 3  | 14.3 | NA      | NA      | NA     | NA      | NA     | NA     | NA | NA |
| 1337 | Q9P289 | STK26   | Serine/threonine kinase                    | sp Q9P289 STK26_HUMAN | 5  | 14.4 | 0.0275134 | 0.88793 | 0.9984 | -0.294  | 0.88793 | 0.99836 | 4  | 12.7 | NA      | NA      | NA     | NA      | NA     | NA     | NA | NA |
| 1338 | Q9P2E9 | RRBP1   | Ribosome-binding protein                   | sp Q9P2E9 RRBP1_HUMAN | 30 | 37.4 | 0.0787725 | 0.7234  | 0.9984 | 0.4077  | 0.7234  | 0.99836 | 16 | 22.8 | -0.2541 | NA      | NA     | NA      | NA     | NA     | NA | NA |
| 1339 | Q9P2J5 | LARS    | Leucine-tRNA ligase                        | sp Q9P2J5 SYLC_HUMAN  | 24 | 22.1 | 0.1223943 | 0.72814 | 0.9991 | -0.0618 | 0.86059 | 0.92074 | 24 | 24.4 | 0.41127 | 0.25171 | 0.9973 | 0.97165 | 0.0125 | 0.0266 | 1  | 1  |
| 1340 | Q9P2R7 | SUCLA2  | Succinate-CoA ligase                       | sp Q9P2R7 SUCB1_HUMAN | 4  | 8    | -0.190161 | 0.72471 | 0.9991 | 0.9158  | 0.05438 | 0.18165 | 9  | 23.1 | 0.09394 | 0.79388 | 0.9973 | -0.5924 | 0.1173 | 0.1793 | NA | NA |

|      |        |          |                           |                       |    |      |           |         |        |         |         |         |    |      |         |         |        |         |        |        |    |
|------|--------|----------|---------------------------|-----------------------|----|------|-----------|---------|--------|---------|---------|---------|----|------|---------|---------|--------|---------|--------|--------|----|
| 1341 | Q9UBB4 | ATXN10   | Ataxin-10                 | sp Q9UBB4 ATX10_HUMAN | 3  | 8.2  | -0.6824   | 0.27301 | 0.9991 | -0.0533 | 0.92939 | 0.9536  | 11 | 28.8 | -0.1312 | 0.78984 | 0.9973 | 1.72642 | 0.0031 | 0.0084 | 1  |
| 1342 | Q9UBC3 | DNMT3B   | DNA (cytosine-5           | sp Q9UBC3 DNM3B_HUMAN | 12 | 17.8 | 0.0589872 | 0.72008 | 0.9984 | 0.566   | 0.72008 | 0.99836 | NA | NA   | NA      | NA      | NA     | NA      | NA     | NA     | NA |
| 1343 | Q9UBE0 | SAE1     | SUMO-activating           | sp Q9UBE0 SAE1_HUMAN  | 8  | 24.6 | 0.3476976 | 0.11639 | 0.9991 | 0.0767  | 0.71912 | 0.84693 | 9  | 32.1 | 0.50276 | 0.02878 | 0.9973 | 0.13235 | 0.5367 | 0.629  | 1  |
| 1344 | Q9UBF2 | COPG2    | Coatomer subunit          | sp Q9UBF2 COPG2_HUMAN | 4  | 5.9  | -0.335143 | NA      | NA     | NA      | NA      | NA      | 5  | 7.1  | NA      | NA      | NA     | NA      | NA     | NA     | NA |
| 1345 | Q9UBQ0 | VPS29    | Vacuolar protein          | sp Q9UBQ0 VPS29_HUMAN | 1  | 7.1  | NA        | NA      | NA     | NA      | NA      | NA      | 3  | 19.8 | 0.67295 | 0.1203  | 0.9991 | 0.7035  | 0.1203 | 0.9991 | NA |
| 1346 | Q9UBQ5 | EIF3K    | Eukaryotic translation    | sp Q9UBQ5 EIF3K_HUMAN | 4  | 22.5 | 0.3924531 | 0.21687 | 0.9991 | -0.085  | 0.78424 | 0.88823 | 5  | 27.5 | 0.2973  | 0.3447  | 0.9973 | 1.16061 | 0.0015 | 0.0046 | 1  |
| 1347 | Q9UBS4 | DNAJB11  | DnaJ homolog sub          | sp Q9UBS4 DJB11_HUMAN | 3  | 10.9 | NA        | NA      | NA     | NA      | NA      | NA      | 9  | 32.1 | -0.4294 | 0.14321 | 0.9991 | -0.5721 | 0.1432 | 0.9991 | NA |
| 1348 | Q9UBT2 | UBA2     | SUMO-activating           | sp Q9UBT2 SAE2_HUMAN  | 7  | 13.4 | 0.3276778 | 0.17342 | 0.9991 | 0.1337  | 0.56917 | 0.7271  | 12 | 28.4 | 0.26318 | 0.26941 | 0.9973 | 0.08312 | 0.7227 | 0.7823 | NA |
| 1349 | Q9UDR5 | AASS     | Alpha-amino acid          | sp Q9UDR5 AASS_HUMAN  | 12 | 18.1 | 0.0647776 | 0.69258 | 0.9984 | 0.5598  | 0.69258 | 0.99836 | NA | NA   | NA      | NA      | NA     | NA      | NA     | NA     | NA |
| 1350 | Q9UDY2 | TJP2     | Tight junction protein    | sp Q9UDY2 ZO2_HUMAN   | 6  | 6.2  | -0.02156  | NA      | NA     | NA      | NA      | NA      | 3  | 2.8  | NA      | NA      | NA     | NA      | NA     | NA     | NA |
| 1351 | Q9UG63 | ABCF2    | ATP-binding cassette      | sp Q9UG63 ABCF2_HUMAN | 1  | 1.8  | NA        | NA      | NA     | NA      | NA      | NA      | 7  | 13   | -0.0074 | 0.97668 | 0.9991 | -0.3467 | 0.9767 | 0.9991 | NA |
| 1352 | Q9UHB6 | LIMA1    | LIM domain and            | sp Q9UHB6 LIMA1_HUMAN | 4  | 5.8  | NA        | NA      | NA     | NA      | NA      | NA      | 7  | 10.9 | NA      | NA      | NA     | -0.3672 | NA     | NA     | NA |
| 1353 | Q9UHB9 | SRP68    | Signal recognition        | sp Q9UHB9 SRP68_HUMAN | 8  | 17.5 | 0.0407962 | 0.89834 | 0.9991 | -0.2828 | 0.43296 | 0.6164  | 9  | 18.3 | 0.01835 | 0.95417 | 0.9973 | -0.5285 | 0.1126 | 0.1732 | NA |
| 1354 | Q9UHD1 | CHORDC1  | Cysteine and histidine    | sp Q9UHD1 CHRD1_HUMAN | 7  | 25.9 | 0.3023245 | NA      | NA     | NA      | NA      | NA      | 7  | 28.6 | 0.76547 | 0.03208 | 0.9991 | 1.62391 | 0.0321 | 0.9991 | NA |
| 1355 | Q9UHD8 | Sep-09   | Septin-9                  | sp Q9UHD8 SEPT9_HUMAN | 12 | 23.7 | 0.2198836 | 0.39599 | 0.9991 | -0.3412 | 0.19452 | 0.37903 | 17 | 39.9 | 0.00891 | 0.97225 | 0.9973 | -0.0459 | 0.8578 | 0.8839 | NA |
| 1356 | Q9UHV9 | PFDN2    | Prefoldin subunit         | sp Q9UHV9 PFD2_HUMAN  | 4  | 31.2 | 0.5872601 | NA      | NA     | NA      | NA      | NA      | 6  | 47.4 | -0.1733 | 0.68881 | 0.9991 | 0.57498 | 0.6888 | 0.9991 | NA |
| 1357 | Q9UHX1 | PUF60    | Poly(U)-binding           | sp Q9UHX1 PUF60_HUMAN | 11 | 30.4 | 0.0030259 | 0.98823 | 0.9991 | 0.5927  | 0.00955 | 0.06292 | 13 | 32.7 | 0.02506 | 0.90278 | 0.9973 | -0.3561 | 0.0966 | 0.1553 | 5  |
| 1358 | Q9UIQ4 | SALL4    | Sal-like protein          | sp Q9UIQ4 SALL4_HUMAN | 7  | 9.4  | 0.6290107 | 0.07964 | 0.9984 | 1.0391  | 0.07964 | 0.99836 | NA | NA   | NA      | NA      | NA     | NA      | NA     | NA     | NA |
| 1359 | Q9UIJ0 | SLC25A13 | Calcium-binding           | sp Q9UIJ0 CMC2_HUMAN  | 9  | 16.4 | -0.139445 | 0.61888 | 0.9991 | 0.4481  | 0.16246 | 0.33643 | 8  | 14.5 | 0.30798 | 0.48099 | 0.9973 | 1.51648 | 0.0012 | 0.0037 | 1  |
| 1360 | Q9UIJ2 | STOML2   | Stomatin-like protein     | sp Q9UIJ2 STML2_HUMAN | 9  | 42.1 | 0.2343504 | 0.36712 | 0.9984 | 0.7677  | 0.36712 | 0.99836 | 5  | 22.5 | 0.04067 | NA      | NA     | NA      | NA     | NA     | NA |
| 1361 | Q9UK76 | JPT1     | Jupiter microtubule       | sp Q9UK76 JUP1_HUMAN  | 3  | 39   | -0.112505 | 0.72969 | 0.9991 | -0.7198 | 0.13506 | 0.30186 | 8  | 68.8 | 0.24173 | 0.54645 | 0.9973 | 3.79967 | #####  | #####  | 2  |
| 1362 | Q9UKD2 | MRT04    | mRNA turnover             | sp Q9UKD2 MRT4_HUMAN  | 4  | 15.5 | 0.1325284 | 0.72041 | 0.9991 | 0.5715  | 0.13725 | 0.30314 | 4  | 22.2 | -0.3162 | 0.23789 | 0.9973 | -0.4685 | 0.0889 | 0.1442 | NA |
| 1363 | Q9UKF6 | CPSF3    | Cleavage and poly         | sp Q9UKF6 CPSF3_HUMAN | 8  | 13   | -0.054866 | 0.81783 | 0.9984 | 0.4182  | 0.81783 | 0.99836 | 6  | 10.2 | -0.0109 | NA      | NA     | NA      | NA     | NA     | NA |
| 1364 | Q9UKK9 | NUDT5    | ADP-sugar pyrophosphatase | sp Q9UKK9 NUDT5_HUMAN | 8  | 38.8 | -0.213425 | 0.41192 | 0.9991 | -0.8259 | 0.01037 | 0.06563 | 11 | 48.4 | -0.7897 | 0.00685 | 0.7846 | 0.87214 | 0.0035 | 0.0092 | 2  |
| 1365 | Q9UKM9 | RALY     | RNA-binding protein       | sp Q9UKM9 RALY_HUMAN  | 5  | 15.7 | -0.172323 | 0.37972 | 0.9984 | 0.1169  | 0.37972 | 0.99836 | 6  | 20.6 | NA      | NA      | NA     | NA      | NA     | NA     | NA |
| 1366 | Q9UKV3 | ACIN1    | Apoptotic chromatin       | sp Q9UKV3 ACIN1_HUMAN | 13 | 11.7 | 0.0119722 | 0.96868 | 0.9991 | 0.8141  | 0.01518 | 0.08154 | 8  | 5.6  | 0.27004 | 0.38149 | 0.9973 | 0.6497  | 0.0456 | 0.0801 | 1  |
| 1367 | Q9UKX7 | NUP50    | Nuclear pore complex      | sp Q9UKX7 NUP50_HUMAN | 6  | 16.2 | -0.081708 | 0.85708 | 0.9984 | -0.2542 | 0.85708 | 0.99836 | 9  | 26.9 | NA      | NA      | NA     | NA      | NA     | NA     | NA |
| 1368 | Q9UKY7 | CDV3     | Protein CDV3 homolog      | sp Q9UKY7 CDV3_HUMAN  | 2  | 8.5  | NA        | NA      | NA     | NA      | NA      | NA      | 6  | 24.4 | -0.0796 | 0.82406 | 0.9991 | 0.17052 | 0.8241 | 0.9991 | NA |
| 1369 | Q9UL46 | PSME2    | Proteasome activator      | sp Q9UL46 PSME2_HUMAN | 2  | 7.5  | NA        | NA      | NA     | NA      | NA      | NA      | 12 | 58.2 | -0.5407 | 0.23265 | 0.9991 | -1.4986 | 0.2326 | 0.9991 | NA |
| 1370 | Q9ULV4 | COR01C   | Coronin-1C                | sp Q9ULV4 COR1C_HUMAN | 5  | 9.5  | -0.070093 | 0.77166 | 0.9991 | -0.0494 | 0.85485 | 0.92074 | 5  | 15.2 | 0.35898 | 0.19643 | 0.9973 | 0.32951 | 0.2336 | 0.3185 | NA |
| 1371 | Q9UMS4 | PRPF19   | Pre-mRNA processing       | sp Q9UMS4 PRP19_HUMAN | 6  | 14.9 | 0.2299387 | 0.41019 | 0.9991 | 0.1483  | 0.59299 | 0.7481  | 8  | 22.8 | -0.1552 | 0.57621 | 0.9973 | 0.24438 | 0.3821 | 0.4761 | NA |
| 1372 | Q9UN86 | G3BP2    | Ras GTPase-activating     | sp Q9UN86 G3BP2_HUMAN | 4  | 10.8 | 0.6588838 | 0.13814 | 0.9991 | -0.1439 | 0.73782 | 0.85849 | 13 | 34   | -0.0927 | 0.82903 | 0.9973 | -0.047  | 0.9129 | 0.9246 | NA |
| 1373 | Q9UNF0 | PACSN2   | Protein kinase C          | sp Q9UNF0 PACN2_HUMAN | 8  | 19.8 | 0.0430615 | 0.82767 | 0.9991 | -0.0426 | 0.82965 | 0.9155  | 5  | 13.6 | 0.01782 | 0.95207 | 0.9973 | -0.281  | 0.217  | 0.3029 | NA |
| 1374 | Q9UNF1 | MAGED2   | Melanoma-associated       | sp Q9UNF1 MAGD2_HUMAN | 10 | 24.9 | 0.168554  | 0.60094 | 0.9984 | 1.0841  | 0.60094 | 0.99836 | 3  | 7.6  | NA      | NA      | NA     | NA      | NA     | NA     | NA |
| 1375 | Q9UNM6 | PSMD13   | 26S proteasome            | sp Q9UNM6 PSD13_HUMAN | 8  | 22.6 | 0.0318109 | 0.864   | 0.9991 | -0.5777 | 0.00593 | 0.04727 | 11 | 36.2 | 0.04232 | 0.81982 | 0.9973 | 0.04005 | 0.8293 | 0.8584 | 3  |
| 1376 | Q9UNN5 | FAF1     | FAS-associated factor     | sp Q9UNN5 FAF1_HUMAN  | 2  | 3.8  | NA        | NA      | NA     | NA      | NA      | NA      | 4  | 7.5  | 0.13115 | 0.66719 | 0.9991 | 0.60791 | 0.6672 | 0.9991 | NA |
| 1377 | Q9UNS2 | COPS3    | COP9 signalosome          | sp Q9UNS2 CSN3_HUMAN  | 1  | 3.5  | NA        | NA      | NA     | NA      | NA      | NA      | 6  | 21   | -0.2757 | NA      | NA     | NA      | NA     | NA     | NA |
| 1378 | Q9UNX4 | WDR3     | WD repeat-containing      | sp Q9UNX4 WDR3_HUMAN  | 4  | 5.7  | -0.066117 | 0.83289 | 0.9984 | 0.7541  | 0.83289 | 0.99836 | 4  | 5.3  | NA      | NA      | NA     | NA      | NA     | NA     | NA |
| 1379 | Q9UNZ2 | NSFL1C   | NSFL1 cofactor protein    | sp Q9UNZ2 NSF1C_HUMAN | 7  | 25.9 | 0.3013779 | 0.29371 | 0.9991 | -0.5195 | 0.11394 | 0.27928 | 8  | 29.2 | -0.3116 | 0.27817 | 0.9973 | -0.2349 | 0.4098 | 0.5044 | NA |
| 1380 | Q9UPN3 | MACF1    | Microtubule-associated    | sp Q9UPN3 MACF1_HUMAN | 4  | 0.7  | -0.155603 | 0.53774 | 0.9984 | 0.1649  | 0.53774 | 0.99836 | 10 | 2    | NA      | NA      | NA     | NA      | NA     | NA     | NA |
| 1381 | Q9UQ35 | SRRM2    | Serine/arginine           | sp Q9UQ35 SRRM2_HUMAN | 4  | 2.8  | 0.0332732 | 0.8892  | 0.9984 | 1.0429  | 0.8892  | 0.99836 | 16 | 8.9  | NA      | NA      | NA     | NA      | NA     | NA     | NA |
| 1382 | Q9UQ80 | PA2G4    | Proliferation-associated  | sp Q9UQ80 PA2G4_HUMAN | 14 | 43.1 | 0.2251901 | 0.26956 | 0.9991 | 0.1672  | 0.40825 | 0.60515 | 22 | 71.3 | 0.03123 | 0.87601 | 0.9973 | -0.649  | 0.0045 | 0.0114 | 4  |
| 1383 | Q9UQE7 | SMC3     | Structural maintenance    | sp Q9UQE7 SMC3_HUMAN  | 16 | 14.5 | 0.0445743 | 0.859   | 0.9991 | 0.3479  | 0.17766 | 0.35476 | 16 | 16.1 | 0.08743 | 0.72788 | 0.9973 | -0.2469 | 0.332  | 0.4225 | NA |
| 1384 | Q9Y224 | RTRAF    | RNA transcription factor  | sp Q9Y224 RTRAF_HUMAN | 4  | 16.8 | 0.050625  | 0.90114 | 0.9991 | 0.272   | 0.54534 | 0.70555 | 12 | 57.4 | 0.69958 | 0.19047 | 0.9973 | 2.47596 | #####  | #####  | 1  |
| 1385 | Q9Y230 | RUVBL2   | RuvB-like 2               | sp Q9Y230 RUVB2_HUMAN | 11 | 30   | 0.2092625 | 0.26159 | 0.9991 | -0.1534 | 0.40626 | 0.60515 | 16 | 43.8 | -0.1412 | 0.44384 | 0.9973 | 0.73102 | 0.0009 | 0.0029 | 2  |
| 1386 | Q9Y262 | EIF3L    | Eukaryotic translation    | sp Q9Y262 EIF3L_HUMAN | 12 | 25   | -0.350771 | 0.07366 | 0.9991 | -0.4315 | 0.03157 | 0.12742 | 23 | 50   | 0.02297 | 0.90192 | 0.9973 | -0.0883 | 0.6367 | 0.7188 | 3  |
| 1387 | Q9Y263 | PLAA     | Phospholipase A2          | sp Q9Y263 PLAP_HUMAN  | 6  | 9.8  | -0.080457 | 0.67111 | 0.9984 | -0.057  | 0.67111 | 0.99836 | 4  | 7.7  | NA      | NA      | NA     | NA      | NA     | NA     | NA |
| 1388 | Q9Y265 | RUVBL1   | RuvB-like 1               | sp Q9Y265 RUVB1_HUMAN | 12 | 34.2 | 0.0993665 | 0.59793 | 0.9991 | -0.1549 | 0.41381 | 0.60623 | 18 | 57.2 | 0.02638 | 0.8882  | 0.9973 | 0.97298 | #####  | 0.0004 | 2  |

|      |        |         |                                             |                       |    |      |           |         |        |         |         |         |    |      |         |         |        |         |        |        |    |
|------|--------|---------|---------------------------------------------|-----------------------|----|------|-----------|---------|--------|---------|---------|---------|----|------|---------|---------|--------|---------|--------|--------|----|
| 1389 | Q9Y266 | NUDC    | Nuclear migration                           | sp Q9Y266 NUDC_HUMAN  | 16 | 51.4 | 0.1912736 | 0.34894 | 0.9991 | -0.3614 | 0.0868  | 0.24019 | 18 | 51.4 | -0.1294 | 0.52311 | 0.9973 | 0.46042 | 0.0335 | 0.0615 | 2  |
| 1390 | Q9Y277 | VDAC3   | Voltage-dependent anion channel             | sp Q9Y277 VDAC3_HUMAN | 6  | 31.8 | -0.257004 | 0.23804 | 0.9984 | 0.4282  | 0.23804 | 0.99836 | 6  | 32.9 | -0.0094 | NA      | NA     | NA      | NA     | NA     | NA |
| 1391 | Q9Y285 | FARSA   | Phenylalanine-tRNA synthetase               | sp Q9Y285 SYFA_HUMAN  | 6  | 14   | 0.4749002 | 0.10062 | 0.9984 | 0.1742  | 0.10062 | 0.99836 | 8  | 21.5 | NA      | NA      | NA     | NA      | NA     | NA     | NA |
| 1392 | Q9Y295 | DRG1    | Developmental regulator 1                   | sp Q9Y295 DRG1_HUMAN  | 4  | 17.2 | 0.0063915 | 0.97514 | 0.9991 | -0.0441 | 0.84775 | 0.91851 | 7  | 31.6 | 0.37366 | 0.08338 | 0.9973 | 0.08302 | 0.6864 | 0.7593 | NA |
| 1393 | Q9Y2B0 | CNPY2   | Protein canopy homolog                      | sp Q9Y2B0 CNPY2_HUMAN | 2  | 15.9 | NA        | NA      | NA     | NA      | NA      | NA      | 8  | 53.8 | 0.0207  | 0.9742  | 0.9991 | 1.47698 | 0.9742 | 0.9991 | NA |
| 1394 | Q9Y2L1 | DIS3    | Exosome complex subunit                     | sp Q9Y2L1 RRP44_HUMAN | 5  | 6.5  | -0.363307 | NA      | NA     | NA      | NA      | NA      | 7  | 11.5 | NA      | NA      | NA     | NA      | NA     | NA     | NA |
| 1395 | Q9Y2V2 | CARHSP1 | Calcium-regulated histidine phosphatase     | sp Q9Y2V2 CHSP1_HUMAN | 4  | 40.1 | -0.162038 | 0.7242  | 0.9991 | -0.3156 | 0.54056 | 0.70193 | 3  | 34.7 | 0.15232 | 0.76658 | 0.9973 | 1.67733 | 0.0048 | 0.012  | 2  |
| 1396 | Q9Y2W1 | THRAP3  | Thyroid hormone receptor-associated protein | sp Q9Y2W1 TR150_HUMAN | 15 | 18.1 | -0.042556 | 0.89897 | 0.9991 | 0.8378  | 0.02164 | 0.10155 | 14 | 18.1 | 0.11109 | 0.74067 | 0.9973 | 1.2118  | 0.002  | 0.0057 | 1  |
| 1397 | Q9Y2W2 | WBP11   | WW domain-binding protein                   | sp Q9Y2W2 WBP11_HUMAN | 4  | 8    | -0.035621 | 0.89848 | 0.9991 | 0.2682  | 0.47843 | 0.65484 | 6  | 11.1 | -0.0925 | 0.74096 | 0.9973 | -0.011  | 0.9648 | 0.9723 | NA |
| 1398 | Q9Y2X3 | NOP58   | Nucleolar protein 58                        | sp Q9Y2X3 NOP58_HUMAN | 11 | 27.2 | 0.2776327 | 0.36938 | 0.9991 | 1.1194  | 0.0018  | 0.02746 | 12 | 29.7 | 0.02891 | 0.92459 | 0.9973 | -0.6133 | 0.0579 | 0.0992 | 5  |
| 1399 | Q9Y2X9 | ZNF281  | Zinc finger protein                         | sp Q9Y2X9 ZN281_HUMAN | 5  | 8.6  | NA        | NA      | NA     | 0.5678  | NA      | NA      | NA | NA   | NA      | NA      | NA     | NA      | NA     | NA     | NA |
| 1400 | Q9Y2Z0 | SUGT1   | Protein SGT1 homolog                        | sp Q9Y2Z0 SGT1_HUMAN  | 8  | 29.9 | 0.1948777 | 0.36053 | 0.9991 | -0.2334 | 0.27633 | 0.47715 | 14 | 46.8 | 0.05329 | 0.82072 | 0.9973 | 0.35495 | 0.1061 | 0.1654 | NA |
| 1401 | Q9Y305 | ACOT9   | Acyl-coenzyme A oxidase                     | sp Q9Y305 ACOT9_HUMAN | 3  | 7.3  | -0.304645 | 0.21686 | 0.9984 | 0.282   | 0.21686 | 0.99836 | NA | NA   | NA      | NA      | NA     | NA      | NA     | NA     | NA |
| 1402 | Q9Y333 | LSM2    | U6 snRNA-associated protein                 | sp Q9Y333 LSM2_HUMAN  | 3  | 32.6 | 0.3818189 | 0.20429 | 0.9984 | 0.113   | 0.20429 | 0.99836 | 2  | 31.6 | NA      | NA      | NA     | NA      | NA     | NA     | NA |
| 1403 | Q9Y383 | LUC7L2  | Putative RNA-binding protein                | sp Q9Y383 LC7L2_HUMAN | 4  | 13.3 | 0.6693444 | 0.13681 | 0.9991 | 0.5627  | 0.20594 | 0.39356 | 9  | 26.5 | 0.06757 | 0.82516 | 0.9973 | 0.53137 | 0.0981 | 0.1566 | NA |
| 1404 | Q9Y3B4 | SF3B6   | Splicing factor 3B subunit                  | sp Q9Y3B4 SF3B6_HUMAN | 4  | 34.4 | -0.454054 | 0.43204 | 0.9984 | 0.2222  | 0.43204 | 0.99836 | 4  | 34.4 | NA      | NA      | NA     | 0.90841 | NA     | NA     | NA |
| 1405 | Q9Y3C6 | PPIL1   | Peptidyl-prolyl isomerase                   | sp Q9Y3C6 PPIL1_HUMAN | 2  | 18.7 | -0.543021 | NA      | NA     | NA      | NA      | NA      | 3  | 25.3 | 0.31854 | 0.1771  | 0.9991 | 0.88692 | 0.1771 | 0.9991 | NA |
| 1406 | Q9Y3D9 | MRPS23  | 28S ribosomal protein                       | sp Q9Y3D9 RT23_HUMAN  | 3  | 17.4 | -0.880761 | 0.26526 | 0.9984 | 0.851   | 0.26526 | 0.99836 | 5  | 30.5 | NA      | NA      | NA     | NA      | NA     | NA     | NA |
| 1407 | Q9Y3F4 | STRAP   | Serine-threonine phosphatase                | sp Q9Y3F4 STRAP_HUMAN | 12 | 46.9 | 0.4492951 | 0.24685 | 0.9991 | -0.8559 | 0.03577 | 0.13782 | 14 | 53.4 | -0.0946 | 0.80353 | 0.9973 | 0.44566 | 0.2505 | 0.3339 | 2  |
| 1408 | Q9Y3I0 | RTCB    | tRNA-splicing ligase                        | sp Q9Y3I0 RTCB_HUMAN  | 12 | 33.5 | 0.1174597 | 0.5791  | 0.9991 | -0.0136 | 0.94867 | 0.96777 | 17 | 43   | 0.09317 | 0.65937 | 0.9973 | -0.1743 | 0.413  | 0.5071 | NA |
| 1409 | Q9Y3T9 | NOC2L   | Nucleolar complex protein                   | sp Q9Y3T9 NOC2L_HUMAN | 3  | 4.4  | 0.1423093 | NA      | NA     | NA      | NA      | NA      | 5  | 5.9  | NA      | NA      | NA     | NA      | NA     | NA     | NA |
| 1410 | Q9Y3Y2 | CHTOP   | Chromatin target protein                    | sp Q9Y3Y2 CHTOP_HUMAN | 3  | 18.5 | 0.6107747 | 0.11243 | 0.9984 | 0.6817  | 0.11243 | 0.99836 | 2  | 13.3 | -0.2084 | NA      | NA     | NA      | NA     | NA     | NA |
| 1411 | Q9Y467 | SALL2   | Sal-like protein                            | sp Q9Y467 SALL2_HUMAN | 6  | 12   | -0.040524 | 0.87012 | 0.9984 | 1.2641  | 0.87012 | 0.99836 | NA | NA   | NA      | NA      | NA     | NA      | NA     | NA     | NA |
| 1412 | Q9Y490 | TLN1    | Talin-1                                     | sp Q9Y490 TLN1_HUMAN  | 21 | 10.7 | 0.1377982 | 0.61825 | 0.9991 | -1.0219 | 0.00163 | 0.02746 | 40 | 23.3 | 0.08593 | 0.75542 | 0.9973 | -2.0711 | #####  | #####  | 4  |
| 1413 | Q9Y4L1 | HYOU1   | Hypoxia up-regulated protein                | sp Q9Y4L1 HYOU1_HUMAN | 24 | 33.8 | 0.1616135 | 0.43243 | 0.9991 | 0.3383  | 0.11097 | 0.279   | 23 | 34.9 | -0.0555 | 0.78585 | 0.9973 | -2.0943 | #####  | #####  | 4  |
| 1414 | Q9Y4W2 | LAS1L   | Ribosomal biogenesis factor                 | sp Q9Y4W2 LAS1L_HUMAN | 3  | 6.3  | -1.818271 | NA      | NA     | NA      | NA      | NA      | NA | NA   | NA      | NA      | NA     | NA      | NA     | NA     | NA |
| 1415 | Q9Y4W6 | AFG3L2  | AFG3-like protein                           | sp Q9Y4W6 AFG32_HUMAN | 6  | 8.3  | -0.561934 | 0.13579 | 0.9984 | 0.3043  | 0.13579 | 0.99836 | 3  | 6.1  | NA      | NA      | NA     | NA      | NA     | NA     | NA |
| 1416 | Q9Y4Z0 | LSM4    | U6 snRNA-associated protein                 | sp Q9Y4Z0 LSM4_HUMAN  | 2  | 14.4 | 0.5718934 | 0.34865 | 0.9991 | 0.1417  | 0.83262 | 0.91666 | 3  | 21.6 | 0.53408 | 0.55515 | 0.9973 | 0.213   | 0.8017 | 0.8396 | NA |
| 1417 | Q9Y512 | SAMM50  | Sorting and assembly factor                 | sp Q9Y512 SAM50_HUMAN | 5  | 12.2 | -0.181307 | 0.44588 | 0.9984 | 0.4019  | 0.44588 | 0.99836 | 2  | 6.6  | NA      | NA      | NA     | NA      | NA     | NA     | NA |
| 1418 | Q9Y520 | PRRC2C  | Protein PRRC2C                              | sp Q9Y520 PRC2C_HUMAN | 14 | 6.5  | -0.017763 | 0.95984 | 0.9991 | 0.1327  | 0.70737 | 0.84008 | 12 | 5.8  | 0.10239 | 0.79536 | 0.9973 | 0.09769 | 0.8046 | 0.8413 | NA |
| 1419 | Q9Y5A9 | YTHDF2  | YTH domain-containing protein               | sp Q9Y5A9 YTHD2_HUMAN | 6  | 11.4 | 0.2281611 | 0.47729 | 0.9991 | 0.2718  | 0.39868 | 0.60515 | 9  | 19   | -0.1988 | 0.5351  | 0.9973 | -0.0759 | 0.8119 | 0.8465 | NA |
| 1420 | Q9Y5B9 | SUPT16H | FACT complex subunit                        | sp Q9Y5B9 SP16H_HUMAN | 18 | 19.7 | 0.0144997 | 0.94411 | 0.9991 | 0.0292  | 0.88775 | 0.93452 | 15 | 17.2 | -0.0073 | 0.97179 | 0.9973 | 0.54214 | 0.0168 | 0.0348 | 1  |
| 1421 | Q9Y5J9 | TIMM8B  | Mitochondrial inner membrane protein        | sp Q9Y5J9 TIM8B_HUMAN | 2  | 25.3 | -0.464544 | 0.27556 | 0.9984 | -0.0892 | 0.27556 | 0.99836 | 3  | 33.7 | NA      | NA      | NA     | NA      | NA     | NA     | NA |
| 1422 | Q9Y5K5 | UCHL5   | Ubiquitin carboxyl-terminal hydrolase       | sp Q9Y5K5 UCHL5_HUMAN | 1  | 3.3  | NA        | NA      | NA     | NA      | NA      | NA      | 6  | 20.7 | -0.2418 | 0.28394 | 0.9991 | 0.39709 | 0.2839 | 0.9991 | NA |
| 1423 | Q9Y5K6 | CD2AP   | CD2-associated protein                      | sp Q9Y5K6 CD2AP_HUMAN | 3  | 6.7  | 0.8149763 | NA      | NA     | NA      | NA      | NA      | 4  | 6.6  | NA      | NA      | NA     | NA      | NA     | NA     | NA |
| 1424 | Q9Y5L0 | TNPO3   | Transportin-3                               | sp Q9Y5L0 TNPO3_HUMAN | 2  | 2.2  | -0.073818 | NA      | NA     | NA      | NA      | NA      | 3  | 4.8  | NA      | NA      | NA     | NA      | NA     | NA     | NA |
| 1425 | Q9Y5L4 | TIMM13  | Mitochondrial inner membrane protein        | sp Q9Y5L4 TIM13_HUMAN | 2  | 28.4 | -0.957385 | 0.00976 | 0.9984 | -1.1631 | 0.00976 | 0.99836 | 4  | 53.7 | NA      | NA      | NA     | NA      | NA     | NA     | NA |
| 1426 | Q9Y5M8 | SRPRB   | Signal recognition particle                 | sp Q9Y5M8 SRPRB_HUMAN | 5  | 22.1 | 0.7849735 | NA      | NA     | NA      | NA      | NA      | 6  | 28.8 | NA      | NA      | NA     | NA      | NA     | NA     | NA |
| 1427 | Q9Y5S9 | RBM8A   | RNA-binding protein                         | sp Q9Y5S9 RBM8A_HUMAN | 4  | 36.8 | 0.4338247 | 0.05478 | 0.9991 | 0.384   | 0.08537 | 0.238   | 5  | 50.6 | 0.06018 | 0.77776 | 0.9973 | 0.08034 | 0.7066 | 0.7767 | NA |
| 1428 | Q9Y605 | MRFAP1  | MORF4 family-associated protein             | sp Q9Y605 MOFA1_HUMAN | 2  | 28.3 | 0.1223033 | 0.76664 | 0.9984 | 0.3327  | 0.76664 | 0.99836 | 2  | 26.8 | NA      | NA      | NA     | NA      | NA     | NA     | NA |
| 1429 | Q9Y617 | PSAT1   | Phosphoserine aminotransferase              | sp Q9Y617 SERC_HUMAN  | 7  | 20.3 | 0.547107  | 0.09932 | 0.9991 | -0.1218 | 0.73161 | 0.85314 | 7  | 22.4 | 0.04577 | 0.88523 | 0.9973 | -0.5543 | 0.0953 | 0.1536 | NA |
| 1430 | Q9Y678 | COPG1   | Coatomer subunit                            | sp Q9Y678 COPG1_HUMAN | 4  | 5.4  | NA        | NA      | NA     | NA      | NA      | NA      | 18 | 27.9 | 0.10975 | 0.71579 | 0.9991 | -1.3445 | 0.7158 | 0.9991 | NA |
| 1431 | Q9Y696 | CLIC4   | Chloride intracellular channel              | sp Q9Y696 CLIC4_HUMAN | 10 | 42.3 | 0.0718756 | 0.6948  | 0.9991 | -0.8729 | 0.00017 | 0.00845 | 15 | 64.8 | 0.10059 | 0.5838  | 0.9973 | -0.8129 | 0.0003 | 0.0013 | 3  |
| 1432 | Q9Y6A4 | CFAP20  | Cilia- and flagellum-associated protein     | sp Q9Y6A4 CFA20_HUMAN | 2  | 10.4 | NA        | NA      | NA     | NA      | NA      | NA      | 2  | 10.4 | 1.33913 | 0.01513 | 0.9991 | 1.32015 | 0.0151 | 0.9991 | NA |
| 1433 | Q9Y6A5 | TACC3   | Transforming acid phosphatase               | sp Q9Y6A5 TACC3_HUMAN | 6  | 9.4  | 0.069217  | 0.77586 | 0.9984 | 0.6446  | 0.77586 | 0.99836 | 5  | 8.5  | NA      | NA      | NA     | NA      | NA     | NA     | NA |
| 1434 | Q9Y6A9 | SPCS1   | Signal peptidase                            | sp Q9Y6A9 SPCS1_HUMAN | 2  | 26.5 | 0.0109733 | 0.95593 | 0.999  | 0.217   | 0.95593 | 0.99899 | 2  | 26.5 | NA      | NA      | NA     | NA      | NA     | NA     | NA |
| 1435 | Q9Y6C9 | MTCH2   | Mitochondrial carrier                       | sp Q9Y6C9 MTCH2_HUMAN | 5  | 23.8 | -0.017472 | 0.93766 | 0.999  | 0.7484  | 0.93766 | 0.99899 | 3  | 16.8 | 0.02829 | NA      | NA     | NA      | NA     | NA     | NA |
| 1436 | Q9Y6E2 | BZW2    | Basic leucine zipper                        | sp Q9Y6E2 BZW2_HUMAN  | 5  | 9.3  | 0.3444674 | 0.36146 | 0.9991 | -0.0916 | 0.78757 | 0.88965 | 8  | 15   | -0.2941 | 0.34054 | 0.9973 | -0.3665 | 0.2391 | 0.3235 | NA |

|      |        |          |                   |                        |    |      |           |         |        |        |         |         |    |      |         |         |        |         |        |        |    |
|------|--------|----------|-------------------|------------------------|----|------|-----------|---------|--------|--------|---------|---------|----|------|---------|---------|--------|---------|--------|--------|----|
| 1437 | Q9Y6K1 | DNMT3A   | DNA (cytosine-5   | sp Q9Y6K1 DNM3A_HUMA   | 6  | 8.9  | -0.222284 | 0.30541 | 0.9984 | 0.2803 | 0.30541 | 0.99836 | 2  | 3.4  | NA      | NA      | NA     | NA      | NA     | NA     | NA |
| 1438 | Q9Y6M1 | IGF2BP2  | Insulin-like grow | sp Q9Y6M1 IF2B2_HUMAN  | 8  | 17   | 0.5693228 | 0.16174 | 0.9984 | 0.965  | 0.16174 | 0.99836 | 6  | 13.4 | 0.08861 | NA      | NA     | NA      | NA     | NA     | NA |
| 1439 | O00170 | AIP      | AH receptor-inte  | sp O00170 AIP_HUMAN A  | NA | NA   | NA        | NA      | NA     | NA     | NA      | NA      | 6  | 26.1 | -0.1379 | 0.62896 | 0.9991 | 0.43341 | 0.629  | 0.9991 | NA |
| 1440 | O00469 | PLOD2    | Procollagen-lysin | sp O00469 PLOD2_HUMAN  | NA | NA   | NA        | NA      | NA     | NA     | NA      | NA      | 4  | 7.5  | -0.3718 | NA      | NA     | NA      | NA     | NA     | NA |
| 1441 | O00499 | BIN1     | Myc box-depend    | sp O00499 BIN1_HUMAN   | NA | NA   | NA        | NA      | NA     | NA     | NA      | NA      | 13 | 32.5 | -0.4086 | 0.68281 | 0.9991 | 1.68613 | 0.6828 | 0.9991 | NA |
| 1442 | O43353 | RIPK2    | Receptor-interac  | sp O43353 RIPK2_HUMAN  | NA | NA   | NA        | NA      | NA     | NA     | NA      | NA      | 3  | 9.1  | 0.28382 | NA      | NA     | NA      | NA     | NA     | NA |
| 1443 | O60493 | SNX3     | Sorting nexin-3   | sp O60493 SNX3_HUMAN   | NA | NA   | NA        | NA      | NA     | NA     | NA      | NA      | 4  | 24.1 | 0.23072 | 0.34743 | 0.9991 | 1.42785 | 0.3474 | 0.9991 | NA |
| 1444 | O60568 | PLOD3    | Multifunctional p | sp O60568 PLOD3_HUMAN  | NA | NA   | NA        | NA      | NA     | NA     | NA      | NA      | 5  | 8.7  | 0.19517 | 0.32795 | 0.9991 | 0.36708 | 0.328  | 0.9991 | NA |
| 1445 | O75116 | ROCK2    | Rho-associated p  | sp O75116 ROCK2_HUMAN  | NA | NA   | NA        | NA      | NA     | NA     | NA      | NA      | 10 | 9.8  | 0.11257 | NA      | NA     | NA      | NA     | NA     | NA |
| 1446 | O75306 | NDUF52   | NADH dehydrog     | sp O75306 NDU52_HUMA   | NA | NA   | NA        | NA      | NA     | NA     | NA      | NA      | 3  | 8.2  | 0.09839 | NA      | NA     | NA      | NA     | NA     | NA |
| 1447 | O75746 | SLC25A12 | Calcium-binding   | sp O75746 CMC1_HUMAN   | NA | NA   | NA        | NA      | NA     | NA     | NA      | NA      | 5  | 8.4  | -0.1334 | NA      | NA     | NA      | NA     | NA     | NA |
| 1448 | O94979 | SEC31A   | Protein transpor  | sp O94979 SC31A_HUMAN  | NA | NA   | NA        | NA      | NA     | NA     | NA      | NA      | 9  | 7.4  | 0.64186 | 0.31406 | 0.9991 | 0.66722 | 0.3141 | 0.9991 | NA |
| 1449 | O95817 | BAG3     | BAG family mole   | sp O95817 BAG3_HUMAN   | NA | NA   | NA        | NA      | NA     | NA     | NA      | NA      | 10 | 23   | -0.29   | 0.43604 | 0.9991 | 0.45584 | 0.436  | 0.9991 | NA |
| 1450 | O95834 | EML2     | Echinoderm micr   | sp O95834 EMAL2_HUMA   | NA | NA   | NA        | NA      | NA     | NA     | NA      | NA      | 4  | 5.7  | 0.89061 | NA      | NA     | NA      | NA     | NA     | NA |
| 1451 | P04083 | ANXA1    | Annexin A1        | sp P04083 ANXA1_HUMA   | NA | NA   | NA        | NA      | NA     | NA     | NA      | NA      | 4  | 13.6 | 0.0265  | NA      | NA     | NA      | NA     | NA     | NA |
| 1452 | P06703 | S100A6   | Protein S100-A6   | sp P06703 S10A6_HUMAN  | NA | NA   | NA        | NA      | NA     | NA     | NA      | NA      | 3  | 35.6 | -0.0846 | NA      | NA     | NA      | NA     | NA     | NA |
| 1453 | P07197 | NEFM     | Neurofilament n   | sp P07197 NFM_HUMAN    | NA | NA   | NA        | NA      | NA     | NA     | NA      | NA      | 30 | 34.8 | 0.74486 | 0.59248 | 0.9991 | 5.37379 | 0.5925 | 0.9991 | NA |
| 1454 | P07305 | H1FO     | Histone H1.0      | sp P07305 H10_HUMAN H  | NA | NA   | NA        | NA      | NA     | NA     | NA      | NA      | 2  | 11.9 | NA      | NA      | NA     | -1.1137 | NA     | NA     | NA |
| 1455 | P08648 | ITGA5    | Integrin alpha-5  | sp P08648 ITA5_HUMAN I | NA | NA   | NA        | NA      | NA     | NA     | NA      | NA      | 2  | 2.8  | -0.0338 | NA      | NA     | NA      | NA     | NA     | NA |
| 1456 | P09382 | LGALS1   | Galectin-1        | sp P09382 LEG1_HUMAN   | NA | NA   | NA        | NA      | NA     | NA     | NA      | NA      | 9  | 70.4 | 0.33314 | 0.36029 | 0.9991 | 0.83649 | 0.3603 | 0.9991 | NA |
| 1457 | P09486 | SPARC    | SPARC             | sp P09486 SPRC_HUMAN S | NA | NA   | NA        | NA      | NA     | NA     | NA      | NA      | 5  | 16.8 | 0.58681 | 0.10505 | 0.9991 | 1.01351 | 0.1051 | 0.9991 | NA |
| 1458 | P11234 | RALB     | Ras-related prot  | sp P11234 RALB_HUMAN   | NA | NA   | NA        | NA      | NA     | NA     | NA      | NA      | 4  | 19.9 | 0.61475 | NA      | NA     | NA      | NA     | NA     | NA |
| 1459 | P13591 | NCAM1    | Neural cell adhe  | sp P13591 NCAM1_HUMA   | NA | NA   | NA        | NA      | NA     | NA     | NA      | NA      | 3  | 4.7  | -0.2021 | NA      | NA     | NA      | NA     | NA     | NA |
| 1460 | P13929 | ENO3     | Beta-enolase      | sp P13929 ENOB_HUMAN   | NA | NA   | NA        | NA      | NA     | NA     | NA      | NA      | 8  | 27   | 0.2686  | NA      | NA     | NA      | NA     | NA     | NA |
| 1461 | P15090 | FABP4    | Fatty acid-bindin | sp P15090 FABP4_HUMAN  | NA | NA   | NA        | NA      | NA     | NA     | NA      | NA      | 4  | 28.8 | -0.0743 | NA      | NA     | NA      | NA     | NA     | NA |
| 1462 | P16070 | CD44     | CD44 antigen      | sp P16070 CD44_HUMAN   | NA | NA   | NA        | NA      | NA     | NA     | NA      | NA      | 2  | 2.4  | -0.1162 | NA      | NA     | NA      | NA     | NA     | NA |
| 1463 | P20711 | DDC      | Aromatic-L-amin   | sp P20711 DDC_HUMAN A  | NA | NA   | NA        | NA      | NA     | NA     | NA      | NA      | 5  | 12.5 | NA      | NA      | NA     | 3.11209 | NA     | NA     | NA |
| 1464 | P21266 | GSTM3    | Glutathione S-tr  | sp P21266 GSTM3_HUMA   | NA | NA   | NA        | NA      | NA     | NA     | NA      | NA      | 7  | 36.9 | 0.37976 | 0.25106 | 0.9991 | -0.2992 | 0.2511 | 0.9991 | NA |
| 1465 | P35321 | SPRR1A   | Cornifin-A        | sp P35321 SPR1A_HUMAN  | NA | NA   | NA        | NA      | NA     | NA     | NA      | NA      | 2  | 27   | 1.02267 | NA      | NA     | NA      | NA     | NA     | NA |
| 1466 | Q9NRH3 | TUBG2    | Tubulin gamma-    | sp Q9NRH3 TBG2_HUMAN   | NA | NA   | NA        | NA      | NA     | NA     | NA      | NA      | 4  | 14   | 0.29631 | 0.57544 | 0.9991 | 0.55774 | 0.5754 | 0.9991 | NA |
| 1467 | P29317 | EPHA2    | Ephrin type-A re  | sp P29317 EPHA2_HUMAN  | NA | NA   | NA        | NA      | NA     | NA     | NA      | NA      | 2  | 2.3  | -0.1675 | NA      | NA     | NA      | NA     | NA     | NA |
| 1468 | P30740 | SERPINB1 | Leukocyte elasta  | sp P30740 ILEU_HUMAN L | NA | NA   | NA        | NA      | NA     | NA     | NA      | NA      | 4  | 7.7  | -0.3741 | NA      | NA     | NA      | NA     | NA     | NA |
| 1469 | Q9H0L4 | CSTF2T   | Cleavage stimul   | sp Q9H0L4 CSTFT_HUMAN  | 3  | 6.8  | NA        | NA      | NA     | NA     | NA      | NA      | 7  | 16.9 | -0.0335 | 0.96074 | 0.9991 | 1.45532 | 0.9607 | 0.9991 | NA |
| 1470 | Q96A05 | ATP6V1E2 | V-type proton A   | sp Q96A05 VATE2_HUMA   | 2  | 9.7  | NA        | NA      | NA     | NA     | NA      | NA      | 5  | 23   | -0.3579 | 0.23738 | 0.9991 | 0.66514 | 0.2374 | 0.9991 | NA |
| 1471 | P41219 | PRPH     | Peripherin        | sp P41219 PERI_HUMAN P | NA | NA   | NA        | NA      | NA     | NA     | NA      | NA      | 28 | 55.7 | NA      | NA      | NA     | 4.54205 | NA     | NA     | NA |
| 1472 | P46934 | NEDD4    | E3 ubiquitin-pro  | sp P46934 NEDD4_HUMA   | NA | NA   | NA        | NA      | NA     | NA     | NA      | NA      | 7  | 7.4  | -0.0556 | NA      | NA     | NA      | NA     | NA     | NA |
| 1473 | P48507 | GCLM     | Glutamate-cyst    | sp P48507 GSH0_HUMAN   | NA | NA   | NA        | NA      | NA     | NA     | NA      | NA      | 5  | 20.8 | 0.00373 | 0.9879  | 0.9991 | -0.7496 | 0.9879 | 0.9991 | NA |
| 1474 | P50993 | ATP1A2   | Sodium/potassi    | sp P50993 AT1A2_HUMAN  | NA | NA   | NA        | NA      | NA     | NA     | NA      | NA      | 13 | 16.4 | -0.2    | NA      | NA     | NA      | NA     | NA     | NA |
| 1475 | P51965 | UBE2E1   | Ubiquitin-conjug  | sp P51965 UB2E1_HUMAN  | NA | NA   | NA        | NA      | NA     | NA     | NA      | NA      | 2  | 15   | 0.1003  | 0.83473 | 0.9991 | -0.4329 | 0.8347 | 0.9991 | NA |
| 1476 | Q15366 | PCBP2    | Poly(rC)-binding  | sp Q15366 PCBP2_HUMAN  | 12 | 41.6 | -0.651205 | 0.31484 | 0.9984 | 0.6534 | 0.31484 | 0.99836 | 10 | 40   | NA      | NA      | NA     | NA      | NA     | NA     | NA |
| 1477 | P62987 | UBA52    | Ubiquitin-60S rib | sp P62987 RL40_HUMAN L | 6  | 43   | -0.004137 | 0.98076 | 0.9991 | 0.2771 | 0.12011 | 0.2853  | 7  | 47.4 | 0.16015 | 0.35703 | 0.9973 | -0.2451 | 0.1658 | 0.2429 | NA |
| 1478 | P04899 | GNAI2    | Guanine nucleot   | sp P04899 GNAI2_HUMAN  | 8  | 26.2 | 0.1150815 | 0.52734 | 0.9984 | 0.6046 | 0.52734 | 0.99836 | 9  | 32.1 | NA      | NA      | NA     | NA      | NA     | NA     | NA |
| 1479 | Q71DI3 | HIST2H3A | Histone H3.2      | sp Q71DI3 H32_HUMAN H  | 8  | 53.7 | 0.2881617 | 0.50946 | 0.9984 | 0.7242 | 0.50946 | 0.99836 | 5  | 42.6 | NA      | NA      | NA     | NA      | NA     | NA     | NA |
| 1480 | P98082 | DAB2     | Disabled homolo   | sp P98082 DAB2_HUMAN   | NA | NA   | NA        | NA      | NA     | NA     | NA      | NA      | 5  | 7.4  | 0.058   | NA      | NA     | NA      | NA     | NA     | NA |
| 1481 | Q00403 | GTF2B    | Transcription ini | sp Q00403 TF2B_HUMAN   | NA | NA   | NA        | NA      | NA     | NA     | NA      | NA      | 3  | 12   | 0.19911 | NA      | NA     | NA      | NA     | NA     | NA |
| 1482 | Q00534 | CDK6     | Cyclin-dependen   | sp Q00534 CDK6_HUMAN   | NA | NA   | NA        | NA      | NA     | NA     | NA      | NA      | 8  | 31   | 0.29334 | NA      | NA     | NA      | NA     | NA     | NA |
| 1483 | Q00577 | PURA     | Transcriptional a | sp Q00577 PURA_HUMAN   | NA | NA   | NA        | NA      | NA     | NA     | NA      | NA      | 2  | 11.2 | -0.2477 | NA      | NA     | NA      | NA     | NA     | NA |
| 1484 | Q02809 | PLOD1    | Procollagen-lysin | sp Q02809 PLOD1_HUMAN  | NA | NA   | NA        | NA      | NA     | NA     | NA      | NA      | 6  | 11   | 0.13884 | NA      | NA     | NA      | NA     | NA     | NA |

|      |        |           |                   |                       |    |      |           |         |        |         |         |         |    |     |      |         |         |        |         |        |        |    |
|------|--------|-----------|-------------------|-----------------------|----|------|-----------|---------|--------|---------|---------|---------|----|-----|------|---------|---------|--------|---------|--------|--------|----|
| 1485 | Q03135 | CAV1      | Caveolin-1        | sp Q03135 CAV1_HUMAN  | NA | NA   | NA        | NA      | NA     | NA      | NA      | NA      | NA | 4   | 22.5 | 0.03067 | NA      | NA     | NA      | NA     | NA     | NA |
| 1486 | Q09666 | AHNAK     | Neuroblast diffe  | sp Q09666 AHNK_HUMAN  | NA | NA   | NA        | NA      | NA     | NA      | NA      | NA      | NA | 123 | 45.3 | 0.25946 | 0.44341 | 0.9991 | -0.8413 | 0.4434 | 0.9991 | NA |
| 1487 | Q12792 | TWF1      | Twincillin-1      | sp Q12792 TWF1_HUMAN  | NA | NA   | NA        | NA      | NA     | NA      | NA      | NA      | NA | 6   | 21.4 | 0.15341 | 0.56117 | 0.9991 | -0.1504 | 0.5612 | 0.9991 | NA |
| 1488 | Q13188 | STK3      | Serine/threonin   | sp Q13188 STK3_HUMAN  | 2  | 8.4  | NA        | NA      | NA     | NA      | NA      | NA      | NA | NA  | NA   | NA      | NA      | NA     | NA      | NA     | NA     | NA |
| 1489 | Q13155 | AIMP2     | Aminoacyl tRNA    | sp Q13155 AIMP2_HUMAN | NA | NA   | NA        | NA      | NA     | NA      | NA      | NA      | NA | 6   | 27.5 | NA      | NA      | NA     | 0.05273 | NA     | NA     | NA |
| 1490 | Q13322 | GRB10     | Growth factor re  | sp Q13322 GRB10_HUMAN | NA | NA   | NA        | NA      | NA     | NA      | NA      | NA      | NA | 2   | 5.1  | -0.2496 | NA      | NA     | NA      | NA     | NA     | NA |
| 1491 | Q14562 | DHX8      | ATP-dependent     | sp Q14562 DHX8_HUMAN  | NA | NA   | NA        | NA      | NA     | NA      | NA      | NA      | NA | 5   | 5.2  | -0.024  | NA      | NA     | NA      | NA     | NA     | NA |
| 1492 | Q14764 | MVP       | Major vault pro   | sp Q14764 MVP_HUMAN   | NA | NA   | NA        | NA      | NA     | NA      | NA      | NA      | NA | 5   | 7.4  | 0.31747 | NA      | NA     | NA      | NA     | NA     | NA |
| 1493 | Q15052 | ARHGEF6   | Rho guanine nud   | sp Q15052 ARHG6_HUMAN | NA | NA   | NA        | NA      | NA     | NA      | NA      | NA      | NA | 2   | 3    | NA      | NA      | NA     | -0.8735 | NA     | NA     | NA |
| 1494 | Q15102 | PAFAH1B3  | Platelet-activati | sp Q15102 PA1B3_HUMAN | NA | NA   | NA        | NA      | NA     | NA      | NA      | NA      | NA | 10  | 69.7 | -0.0742 | NA      | NA     | NA      | NA     | NA     | NA |
| 1495 | P62491 | RAB11A    | Ras-related prot  | sp P62491 RB11A_HUMAN | 8  | 37   | -0.049649 | 0.81528 | 0.9991 | -0.0755 | 0.72279 | 0.84844 | NA | 10  | 49.1 | -0.4276 | 0.05732 | 0.9973 | 0.37925 | 0.0881 | 0.1435 | NA |
| 1496 | Q16222 | UAP1      | UDP-N-acetylhex   | sp Q16222 UAP1_HUMAN  | NA | NA   | NA        | NA      | NA     | NA      | NA      | NA      | NA | 6   | 16.3 | 0.00298 | NA      | NA     | NA      | NA     | NA     | NA |
| 1497 | Q16777 | HIST2H2AC | Histone H2A typ   | sp Q16777 H2A2C_HUMAN | NA | NA   | NA        | NA      | NA     | NA      | NA      | NA      | NA | 6   | 55   | 0.08528 | 0.81574 | 0.9991 | 2.37984 | 0.8157 | 0.9991 | NA |
| 1498 | Q16881 | TXNRD1    | Thioredoxin redu  | sp Q16881 TRXR1_HUMAN | NA | NA   | NA        | NA      | NA     | NA      | NA      | NA      | NA | 10  | 19.7 | -0.4534 | 0.14691 | 0.9991 | -0.2543 | 0.1469 | 0.9991 | NA |
| 1499 | Q4G0F5 | VP26B     | Vacuolar protei   | sp Q4G0F5 VP26B_HUMAN | NA | NA   | NA        | NA      | NA     | NA      | NA      | NA      | NA | 4   | 15.8 | 0.33413 | NA      | NA     | NA      | NA     | NA     | NA |
| 1500 | P63092 | GNAS      | Guanine nucleot   | sp P63092 GNAS2_HUMAN | 2  | 6.1  | NA        | NA      | NA     | NA      | NA      | NA      | NA | 12  | 16.5 | -0.0191 | 0.93922 | 0.9991 | 2.08617 | 0.9392 | 0.9991 | NA |
| 1501 | Q5VW32 | BROX      | BRO1 domain-co    | sp Q5VW32 BROX_HUMAN  | NA | NA   | NA        | NA      | NA     | NA      | NA      | NA      | NA | 3   | 11.2 | 0.23062 | NA      | NA     | NA      | NA     | NA     | NA |
| 1502 | Q6NZI2 | CAVIN1    | Caveolae-associ   | sp Q6NZI2 CAVN1_HUMAN | NA | NA   | NA        | NA      | NA     | NA      | NA      | NA      | NA | 9   | 25.6 | 0.12768 | NA      | NA     | NA      | NA     | NA     | NA |
| 1503 | Q86Y82 | STX12     | Syntaxin-12       | sp Q86Y82 STX12_HUMAN | NA | NA   | NA        | NA      | NA     | NA      | NA      | NA      | NA | 4   | 19.9 | -0.0389 | NA      | NA     | NA      | NA     | NA     | NA |
| 1504 | Q8IVD9 | NUDCD3    | NudC domain-co    | sp Q8IVD9 NUDC3_HUMAN | NA | NA   | NA        | NA      | NA     | NA      | NA      | NA      | NA | 7   | 26.3 | NA      | NA      | NA     | 0.48942 | NA     | NA     | NA |
| 1505 | Q8IWT0 | ZBTB80S   | Protein archa     | sp Q8IWT0 ARCH_HUMAN  | NA | NA   | NA        | NA      | NA     | NA      | NA      | NA      | NA | 3   | 21   | -0.074  | NA      | NA     | NA      | NA     | NA     | NA |
| 1506 | P15170 | GSPT1     | Eukaryotic pept   | sp P15170 ERF3A_HUMAN | 8  | 21.8 | 0.0908704 | 0.63465 | 0.9984 | -0.2196 | 0.63465 | 0.99836 | NA | 13  | 30.7 | NA      | NA      | NA     | NA      | NA     | NA     | NA |
| 1507 | Q8N392 | ARHGAP18  | Rho GTPase-acti   | sp Q8N392 RHG18_HUMAN | NA | NA   | NA        | NA      | NA     | NA      | NA      | NA      | NA | 2   | 3.9  | -0.0192 | NA      | NA     | NA      | NA     | NA     | NA |
| 1508 | Q8NBJ5 | COLGALT1  | Procollagen gala  | sp Q8NBJ5 GT251_HUMAN | NA | NA   | NA        | NA      | NA     | NA      | NA      | NA      | NA | 5   | 9.3  | 0.1511  | 0.65626 | 0.9991 | -0.048  | 0.6563 | 0.9991 | NA |
| 1509 | P61019 | RAB2A     | Ras-related prot  | sp P61019 RAB2A_HUMAN | 6  | 34.4 | 0.0548909 | 0.79733 | 0.9984 | 0.1367  | 0.79733 | 0.99836 | NA | 6   | 34.4 | NA      | NA      | NA     | NA      | NA     | NA     | NA |
| 1510 | Q75886 | STAM2     | Signal transduci  | sp Q75886 STAM2_HUMAN | 1  | 1.9  | NA        | NA      | NA     | NA      | NA      | NA      | NA | NA  | NA   | NA      | NA      | NA     | NA      | NA     | NA     | NA |
| 1511 | Q92882 | OSTF1     | Osteoclast-stimu  | sp Q92882 OSTF1_HUMAN | NA | NA   | NA        | NA      | NA     | NA      | NA      | NA      | NA | 2   | 17.3 | 0.03689 | NA      | NA     | NA      | NA     | NA     | NA |
| 1512 | Q96C19 | EFHD2     | EF-hand domain    | sp Q96C19 EFHD2_HUMAN | NA | NA   | NA        | NA      | NA     | NA      | NA      | NA      | NA | 7   | 34.6 | 0.18202 | 0.66183 | 0.9991 | 0.43719 | 0.6618 | 0.9991 | NA |
| 1513 | Q96EY1 | DNAJA3    | DnaJ homolog su   | sp Q96EY1 DNJA3_HUMAN | NA | NA   | NA        | NA      | NA     | NA      | NA      | NA      | NA | 7   | 19.8 | NA      | NA      | NA     | -0.1678 | NA     | NA     | NA |
| 1514 | Q96I99 | SUCLG2    | Succinate-CoA li  | sp Q96I99 SUCB2_HUMAN | NA | NA   | NA        | NA      | NA     | NA      | NA      | NA      | NA | 10  | 25.9 | -0.3506 | NA      | NA     | NA      | NA     | NA     | NA |
| 1515 | Q96K76 | USP47     | Ubiquitin carbox  | sp Q96K76 UBP47_HUMAN | NA | NA   | NA        | NA      | NA     | NA      | NA      | NA      | NA | 3   | 2.8  | 0.06969 | NA      | NA     | NA      | NA     | NA     | NA |
| 1516 | Q96L92 | SNX27     | Sorting nexin-27  | sp Q96L92 SNX27_HUMAN | NA | NA   | NA        | NA      | NA     | NA      | NA      | NA      | NA | 4   | 9.2  | 0.24786 | NA      | NA     | NA      | NA     | NA     | NA |
| 1517 | Q9BWM7 | SFXN3     | Sideroflexin-3    | sp Q9BWM7 SFXN3_HUMAN | NA | NA   | NA        | NA      | NA     | NA      | NA      | NA      | NA | 1   | 4.4  | NA      | NA      | NA     | NA      | NA     | NA     | NA |
| 1518 | Q9H098 | FAM107B   | Protein FAM107    | sp Q9H098 F107B_HUMAN | NA | NA   | NA        | NA      | NA     | NA      | NA      | NA      | NA | 5   | 37.4 | 0.06189 | 0.81031 | 0.9991 | -1.191  | 0.8103 | 0.9991 | NA |
| 1519 | Q9HB90 | RRAGC     | Ras-related GTP   | sp Q9HB90 RRAGC_HUMAN | NA | NA   | NA        | NA      | NA     | NA      | NA      | NA      | NA | 5   | 14.3 | -0.0068 | NA      | NA     | NA      | NA     | NA     | NA |
| 1520 | Q9HCS7 | XAB2      | Pre-mRNA-splici   | sp Q9HCS7 SYF1_HUMAN  | NA | NA   | NA        | NA      | NA     | NA      | NA      | NA      | NA | 4   | 7.4  | 0.17127 | NA      | NA     | NA      | NA     | NA     | NA |
| 1521 | Q9NP77 | SSU72     | RNA polymerase    | sp Q9NP77 SSU72_HUMAN | NA | NA   | NA        | NA      | NA     | NA      | NA      | NA      | NA | 3   | 16   | NA      | NA      | NA     | 0.54438 | NA     | NA     | NA |
| 1522 | Q9NVD7 | PARVA     | Alpha-parvin      | sp Q9NVD7 PARVA_HUMAN | NA | NA   | NA        | NA      | NA     | NA      | NA      | NA      | NA | 3   | 11.8 | -0.2541 | NA      | NA     | NA      | NA     | NA     | NA |
| 1523 | Q9NWB6 | ARGLU1    | Arginine and glu  | sp Q9NWB6 ARGL1_HUMAN | NA | NA   | NA        | NA      | NA     | NA      | NA      | NA      | NA | 3   | 8.4  | NA      | NA      | NA     | 1.34851 | NA     | NA     | NA |
| 1524 | Q9NZM1 | MYOF      | Myoferlin         | sp Q9NZM1 MYOF_HUMAN  | NA | NA   | NA        | NA      | NA     | NA      | NA      | NA      | NA | 10  | 6.3  | 0.13595 | NA      | NA     | NA      | NA     | NA     | NA |
| 1525 | Q9P2B2 | PTGFRN    | Prostaglandin F2  | sp Q9P2B2 FPRP_HUMAN  | NA | NA   | NA        | NA      | NA     | NA      | NA      | NA      | NA | 3   | 3.9  | -0.0521 | NA      | NA     | NA      | NA     | NA     | NA |
| 1526 | Q9UBR2 | CTSZ      | Cathepsin Z       | sp Q9UBR2 CATZ_HUMAN  | NA | NA   | NA        | NA      | NA     | NA      | NA      | NA      | NA | 2   | 5.6  | -1.3035 | NA      | NA     | NA      | NA     | NA     | NA |
| 1527 | Q9UBX3 | SLC25A10  | Mitochondrial d   | sp Q9UBX3 DIC_HUMAN   | NA | NA   | NA        | NA      | NA     | NA      | NA      | NA      | NA | 3   | 11.8 | 0.20947 | NA      | NA     | NA      | NA     | NA     | NA |
| 1528 | Q9UIJ7 | AK3       | GTP:AMP phosp     | sp Q9UIJ7 KAD3_HUMAN  | NA | NA   | NA        | NA      | NA     | NA      | NA      | NA      | NA | 10  | 52.9 | -0.1773 | 0.56205 | 0.9991 | -0.2374 | 0.5621 | 0.9991 | NA |
| 1529 | Q9UN36 | NDRG2     | Protein NDRG2     | sp Q9UN36 NDRG2_HUMAN | NA | NA   | NA        | NA      | NA     | NA      | NA      | NA      | NA | 3   | 12.1 | -0.1951 | NA      | NA     | NA      | NA     | NA     | NA |
| 1530 | Q9UNH7 | SNX6      | Sorting nexin-6   | sp Q9UNH7 SNX6_HUMAN  | NA | NA   | NA        | NA      | NA     | NA      | NA      | NA      | NA | 6   | 17.2 | -0.1678 | 0.49211 | 0.9991 | -1.8418 | 0.4921 | 0.9991 | NA |
| 1531 | Q9UQB8 | BAIAP2    | Brain-specific an | sp Q9UQB8 BAIP2_HUMAN | NA | NA   | NA        | NA      | NA     | NA      | NA      | NA      | NA | 10  | 22.8 | -0.1545 | NA      | NA     | NA      | NA     | NA     | NA |
| 1532 | Q9Y281 | CFL2      | Cofilin-2         | sp Q9Y281 COF2_HUMAN  | NA | NA   | NA        | NA      | NA     | NA      | NA      | NA      | NA | 8   | 50.6 | 0.18032 | NA      | NA     | NA      | NA     | NA     | NA |



|      |        |           |                   |                       |    |      |           |           |         |         |          |         |        |      |         |         |         |         |         |        |        |    |
|------|--------|-----------|-------------------|-----------------------|----|------|-----------|-----------|---------|---------|----------|---------|--------|------|---------|---------|---------|---------|---------|--------|--------|----|
| 1533 | Q9Y2Q9 | MRPS28    | 28S ribosomal p   | sp Q9Y2Q9 RT28_HUMAN  | NA | NA   | NA        | NA        | NA      | NA      | NA       | NA      | 2      | 10.2 | NA      | NA      | NA      | 1.27664 | NA      | NA     | NA     |    |
| 1534 | Q9Y371 | SH3GLB1   | Endophilin-B1     | sp Q9Y371 SHLB1_HUMAN | NA | NA   | NA        | NA        | NA      | NA      | NA       | NA      | 4      | 11.2 | -0.0003 | 0.99932 | 0.9999  | -1.1099 | 0.9993  | 0.9999 | NA     |    |
| 1535 | Q9Y5X1 | SNX9      | Sorting nexin-9   | sp Q9Y5X1 SNX9_HUMAN  | NA | NA   | NA        | NA        | NA      | NA      | NA       | NA      | 2      | 4.2  | -0.126  | NA      | NA      | NA      | NA      | NA     | NA     |    |
| 1536 | Q9NR31 | SAR1A     | GTP-binding pro   | sp Q9NR31 SAR1A_HUMA  | 4  | 26.8 | 0.1287896 | 0.50254   | 0.9984  | -0.8872 | 0.50254  | 0.99836 | 6      | 42.9 | NA      | NA      | NA      | NA      | NA      | NA     | NA     |    |
| 1537 | P0DPI2 | GATD3A    | Glutamine amid    | sp P0DPI2 GAL3A_HUMAN | 3  | 17.5 | -0.01067  | 0.97378   | 0.999   | 0.5892  | 0.97378  | 0.99899 | 4      | 25   | NA      | NA      | NA      | NA      | NA      | NA     | NA     |    |
| 1538 | P68036 | UBE2L3    | Ubiquitin-conjug  | sp P68036 UB2L3_HUMAN | 2  | 10.4 | -0.072379 | 0.85246   | 0.9991  | -0.7607 | 0.06409  | 0.20018 | 8      | 65.6 | -0.0669 | 0.86359 | 0.9973  | -0.221  | 0.5718  | 0.6636 | NA     |    |
| 1539 | A8MPP1 | DDX11L8   | Putative ATP-de   | sp A8MPP1 D11L8_HUMA  | 2  | 2.2  | -0.103113 | NA        | NA      | NA      | NA       | NA      | 1      | 1.3  | NA      | NA      | NA      | NA      | NA      | NA     | NA     |    |
| 1540 | Q99613 | EIF3C     | Eukaryotic trans  | sp Q99613 EIF3C_HUMAN | 10 | 15.4 | 0.0305203 | 0.87519   | 0.9991  | -0.2883 | 0.19671  | 0.37977 | 17     | 25.1 | 0.02772 | 0.88657 | 0.9973  | -0.2989 | 0.1381  | 0.2057 | NA     |    |
| 1541 | E9PAV3 | NACA      | Nascent polypep   | sp E9PAV3 NACAM_HUMA  | 6  | 5.1  | 0.2180141 | 0.31103   | 0.9991  | -0.3311 | 0.13152  | 0.29758 | 5      | 3.4  | 0.06699 | 0.7521  | 0.9973  | -0.9268 | 0.0004  | 0.0015 | 4      |    |
| 1542 | O00571 | DDX3X     | ATP-dependent     | sp O00571 DDX3X_HUMA  | 10 | 19.5 | -0.057922 | 0.78227   | 0.9991  | -0.1701 | 0.42133  | 0.61339 | 18     | 30.7 | -0.0516 | 0.80532 | 0.9973  | -1.3786 | #####   | #####  | 4      |    |
| 1543 | P47813 | EIF1AX    | Eukaryotic trans  | sp P47813 IF1AX_HUMAN | 3  | 19.4 | 0.7805285 | 0.16742   | 0.9991  | 0.1354  | 0.82061  | 0.91051 | 4      | 31.2 | 0.22196 | 0.64999 | 0.9973  | 0.15072 | 0.7823  | 0.8217 | NA     |    |
| 1544 | O14818 | PSMA7     | Proteasome sub    | sp O14818 PSA7_HUMAN  | 7  | 37.5 | 0.2341068 | 0.26339   | 0.9991  | -0.233  | 0.26563  | 0.46617 | 9      | 41.5 | -0.075  | 0.71544 | 0.9973  | 0.70054 | 0.0031  | 0.0084 | 2      |    |
| 1545 | P19105 | MYL12A    | Myosin regulato   | sp P19105 ML12A_HUMA  | 3  | 22.8 | -0.311614 | 0.55686   | 0.9991  | -0.3831 | 0.5103   | 0.68136 | 9      | 59.1 | 0.25252 | 0.59413 | 0.9973  | 0.59523 | 0.2193  | 0.3042 | NA     |    |
| 1546 | O43865 | AHCYL1    | S-adenosylhomo    | sp O43865 SAHH2_HUMA  | 2  | 4.3  | -0.293612 | NA        | NA      | NA      | NA       | NA      | 5      | 13.6 | NA      | NA      | NA      | NA      | NA      | NA     | NA     |    |
| 1547 | O60684 | KPNA6     | Importin subunit  | sp O60684 IMA7_HUMAN  | 2  | 5.4  | NA        | NA        | NA      | NA      | NA       | NA      | 9      | 28.4 | 0.09468 | 0.62715 | 0.9991  | 0.08749 | 0.6272  | 0.9991 | NA     |    |
| 1548 | O75348 | ATP6V1G1  | V-type proton A   | sp O75348 VATG1_HUMA  | 2  | 22   | NA        | NA        | NA      | 0.0998  | NA       | NA      | 3      | 28.8 | NA      | NA      | NA      | NA      | NA      | NA     | NA     |    |
| 1549 | O95239 | KIF4A     | Chromosome-ass    | sp O95239 KIF4A_HUMAN | 4  | 3.4  | -0.374034 | 0.38694   | 0.9984  | -0.0854 | 0.38694  | 0.99836 | 7      | 5.7  | 0.10051 | NA      | NA      | NA      | NA      | NA     | NA     |    |
| 1550 | O95819 | MAP4K4    | Mitogen-activat   | sp O95819 M4K4_HUMAN  | 3  | 3.6  | NA        | NA        | NA      | NA      | NA       | NA      | 6      | 6.5  | -0.8129 | NA      | NA      | NA      | NA      | NA     | NA     |    |
| 1551 | O96019 | ACTL6A    | Actin-like protei | sp O96019 ACL6A_HUMAN | 4  | 12.6 | -0.222544 | 0.33233   | 0.9984  | 0.5604  | 0.33233  | 0.99836 | 8      | 29.4 | NA      | NA      | NA      | NA      | NA      | NA     | NA     |    |
| 1552 | P00367 | GLUD1     | Glutamate dehy    | sp P00367 DHE3_HUMAN  | 11 | 23.3 | -0.026912 | 0.88027   | 0.9991  | 0.4967  | 0.01203  | 0.07061 | 14     | 31   | -0.0394 | 0.82564 | 0.9973  | -0.6715 | 0.0015  | 0.0044 | 5      |    |
| 1553 | P01111 | NRAS      | GTPase NRas       | sp P01111 RASN_HUMAN  | 2  | 12.2 | 0.2233319 | 0.54478   | 0.9984  | 0.4146  | 0.54478  | 0.99836 | 2      | 12.2 | NA      | NA      | NA      | NA      | NA      | NA     | NA     |    |
| 1554 | P10316 | HLA-A     | HLA class I histo | sp P10316 1A69_HUMAN  | 4  | 16.2 | -0.17651  | 0.55716   | 0.9984  | 0.4492  | 0.55716  | 0.99836 | NA     | NA   | NA      | NA      | NA      | NA      | NA      | NA     | NA     |    |
| 1555 | Q99878 | HIST1H2AJ | Histone H2A typ   | sp Q99878 H2A1J_HUMAN | 7  | 38.3 | -0.050322 | 0.92912   | 0.999   | 0.0309  | 0.92912  | 0.99899 | NA     | NA   | NA      | NA      | NA      | NA      | NA      | NA     | NA     |    |
| 1556 | P05388 | RPLP0     | 60S acidic ribos  | sp P05388 RLA0_HUMAN  | 6  | 10   | 43.2      | -0.095054 | 0.77673 | 0.9991  | -0.5384  | 0.12152 | 0.2853 | 13   | 53.3    | 0.05038 | 0.88043 | 0.9973  | -0.4318 | 0.2083 | 0.2937 | NA |
| 1557 | P07355 | ANXA2     | Annexin A2        | sp P07355 ANXA2_HUMA  | 13 | 46.3 | -0.145036 | 0.4544    | 0.9991  | -0.2334 | 0.235    | 0.43276 | 29     | 75.8 | 0.19826 | 0.31008 | 0.9973  | -0.9284 | 0.0001  | 0.0006 | 4      |    |
| 1558 | P09429 | HMGB1     | High mobility gr  | sp P09429 HMGB1_HUMA  | 8  | 32.6 | 0.1241136 | 0.68659   | 0.9991  | -0.3275 | 0.29419  | 0.49544 | 12     | 50.2 | -0.121  | 0.69392 | 0.9973  | 1.77134 | #####   | 0.0001 | 2      |    |
| 1559 | P09651 | HNRNPA1   | Heterogeneous     | sp P09651 ROA1_HUMAN  | 17 | 40.6 | -0.466346 | 0.23532   | 0.9991  | -0.3883 | 0.3199   | 0.51783 | 19     | 48.1 | 0.06532 | 0.8651  | 0.9973  | 1.7231  | 0.0003  | 0.0012 | 2      |    |
| 1560 | Q71UI9 | H2AFV     | Histone H2A.V     | sp Q71UI9 H2AV_HUMAN  | 5  | 31.2 | 0.5477235 | 0.22309   | 0.9991  | 0.3309  | 0.45506  | 0.64015 | 6      | 53.9 | 0.62535 | 0.16708 | 0.9973  | 2.42658 | #####   | 0.0002 | 1      |    |
| 1561 | P0CG35 | TMSB15B   | Thymosin beta-1   | sp P0CG35 TB15B_HUMAN | 2  | 40   | 0.6709544 | 0.01493   | 0.9984  | -0.3646 | 0.01493  | 0.99836 | NA     | NA   | NA      | NA      | NA      | NA      | NA      | NA     | NA     |    |
| 1562 | P0DMV9 | HSPA1B    | Heat shock 70 k   | sp P0DMV9 HS71B_HUMA  | 17 | 35.1 | -0.132933 | 0.47877   | 0.9984  | 0.2599  | 0.47877  | 0.99836 | 33     | 68.8 | NA      | NA      | NA      | NA      | NA      | NA     | NA     |    |
| 1563 | P0DN76 | U2AF1L5   | Splicing factor U | sp P0DN76 U2AF5_HUMA  | 2  | 15   | NA        | NA        | NA      | NA      | NA       | NA      | 4      | 25.8 | NA      | NA      | NA      | -0.5205 | NA      | NA     | NA     |    |
| 1564 | P35520 | CBS       | Cystathionine be  | sp P35520 CBS_HUMAN   | 9  | 20.7 | 0.1552582 | 0.45484   | 0.9984  | -0.0986 | 0.45484  | 0.99836 | 3      | 6.2  | NA      | NA      | NA      | NA      | NA      | NA     | NA     |    |
| 1565 | P0DP25 | CALM3     | Calmodulin-3      | sp P0DP25 CALM3_HUMA  | 10 | 70.5 | -0.02015  | 0.93831   | 0.9991  | -0.1763 | 0.50133  | 0.67575 | 12     | 85.2 | 0.08331 | 0.74937 | 0.9973  | 0.4446  | 0.1017  | 0.1603 | NA     |    |
| 1566 | P11169 | SLC2A3    | Solute carrier fa | sp P11169 GTR3_HUMAN  | 6  | 13.1 | -0.19015  | 0.31291   | 0.9984  | 0.8211  | 0.31291  | 0.99836 | NA     | NA   | NA      | NA      | NA      | NA      | NA      | NA     | NA     |    |
| 1567 | P12532 | CKMT1A    | Creatine kinase   | sp P12532 KCRU_HUMAN  | 2  | 4.6  | 0.2043584 | NA        | NA      | NA      | NA       | NA      | 12     | 45.6 | NA      | NA      | NA      | NA      | NA      | NA     | NA     |    |
| 1568 | P63000 | RAC1      | Ras-related C3 b  | sp P63000 RAC1_HUMAN  | 2  | 10.9 | NA        | NA        | NA      | NA      | NA       | NA      | 7      | 43.2 | 0.17321 | 0.43634 | 0.9991  | 0.87262 | 0.4363  | 0.9991 | NA     |    |
| 1569 | P16104 | H2AFX     | Histone H2AX      | sp P16104 H2AX_HUMAN  | 6  | 37.8 | NA        | NA        | NA      | NA      | NA       | NA      | 8      | 63.6 | 0.25704 | 0.234   | 0.9991  | 1.34736 | 0.234   | 0.9991 | NA     |    |
| 1570 | P20340 | RAB6A     | Ras-related prot  | sp P20340 RAB6A_HUMAN | 5  | 28.8 | -0.319335 | 0.2995    | 0.9991  | -0.2546 | 0.40521  | 0.60515 | 5      | 28.8 | -0.3117 | 0.31088 | 0.9973  | -0.6011 | 0.0604  | 0.103  | NA     |    |
| 1571 | P22392 | NME2      | Nucleoside diph   | sp P22392 NDKB_HUMAN  | 10 | 66.4 | -0.212451 | 0.55616   | 0.9991  | -1.1536 | 0.00477  | 0.04078 | 11     | 74.3 | -0.4416 | 0.22927 | 0.9973  | 1.22224 | 0.0032  | 0.0084 | 2      |    |
| 1572 | Q16778 | HIST2H2BE | Histone H2B typ   | sp Q16778 H2B2E_HUMAN | 11 | 60.3 | -0.226468 | 0.499     | 0.9984  | -0.0579 | 0.499    | 0.99836 | 11     | 60.3 | NA      | NA      | NA      | NA      | NA      | NA     | NA     |    |
| 1573 | P38159 | RBMX      | RNA-binding mo    | sp P38159 RBMX_HUMAN  | 12 | 31.7 | 0.3731403 | 0.1306    | 0.9984  | 0.7748  | 0.1306   | 0.99836 | 9      | 22.8 | NA      | NA      | NA      | NA      | NA      | NA     | NA     |    |
| 1574 | P40429 | RPL13A    | 60S ribosomal p   | sp P40429 RL13A_HUMAN | 4  | 20.7 | 0.1120594 | 0.79      | 0.9991  | 0.4367  | 0.30676  | 0.50462 | 6      | 30   | 0.29026 | 0.49302 | 0.9973  | -0.1563 | 0.7106  | 0.7775 | NA     |    |
| 1575 | P41091 | EIF2S3    | Eukaryotic trans  | sp P41091 IF2G_HUMAN  | 8  | 23.5 | -0.411396 | 0.15124   | 0.9991  | -0.9594 | 0.00645  | 0.04968 | 16     | 48.1 | -0.0096 | 0.97243 | 0.9973  | 1.26986 | 0.0003  | 0.0011 | 2      |    |
| 1576 | P46783 | RPS10     | 40S ribosomal p   | sp P46783 RS10_HUMAN  | 4  | 5    | 27.9      | 0.2101839 | 0.52486 | 0.9991  | 0.0553   | 0.86628 | 8      | 43   | 0.47378 | 0.16197 | 0.9973  | -0.9922 | 0.0072  | 0.0167 | 4      |    |
| 1577 | P49585 | PCYT1A    | Choline-phospha   | sp P49585 PCY1A_HUMAN | 2  | 8.4  | 0.2347976 | NA        | NA      | NA      | NA       | NA      | 3      | 12.5 | NA      | NA      | NA      | NA      | NA      | NA     | NA     |    |
| 1578 | P50502 | ST13      | Hsc70-interactin  | sp P50502 F10A1_HUMAN | 7  | 25.7 | 0.1339408 | 0.70569   | 0.9991  | -1.2877 | 0.0019   | 0.0275  | 8      | 25.5 | 0.04495 | 0.89895 | 0.9973  | 2.02474 | #####   | 0.0002 | 2      |    |
| 1579 | P55786 | NPEPPS    | Puromycin-sensi   | sp P55786 PSA_HUMAN   | 13 | 15.3 | -0.279507 | 0.18911   | 0.9991  | -1.2238 | 1.69E-05 | 0.00239 | 9      | 11.5 | -0.1065 | 0.60863 | 0.9973  | -0.6372 | 0.0064  | 0.0152 | 3      |    |
| 1580 | Q99879 | HIST1H2BM | Histone H2B typ   | sp Q99879 H2B1M_HUMA  | 11 | 60.3 | -0.091418 | 0.83714   | 0.9991  | -0.04   | 0.92832  | 0.9536  | 11     | 60.3 | 0.40245 | 0.37121 | 0.9973  | -0.3206 | 0.4743  | 0.5671 | NA     |    |

|      |        |           |                   |                       |    |      |           |         |        |         |         |         |    |      |         |         |        |         |        |        |    |
|------|--------|-----------|-------------------|-----------------------|----|------|-----------|---------|--------|---------|---------|---------|----|------|---------|---------|--------|---------|--------|--------|----|
| 1581 | P61088 | UBE2N     | Ubiquitin-conjug  | sp P61088 UBE2N_HUMAN | 4  | 36.8 | -0.050143 | 0.85903 | 0.9991 | -0.7906 | 0.01151 | 0.07028 | 10 | 80.9 | 0.27762 | 0.33235 | 0.9973 | 2.2958  | #####  | #####  | 2  |
| 1582 | P61158 | ACTR3     | Actin-related pr  | sp P61158 ARP3_HUMAN  | 3  | 6.7  | 0.0635507 | 0.8875  | 0.9984 | 0.0884  | 0.8875  | 0.99836 | 11 | 36.1 | NA      | NA      | NA     | NA      | NA     | NA     | NA |
| 1583 | P84077 | ARF1      | ADP-ribosylation  | sp P84077 ARF1_HUMAN  | 4  | 33.7 | 0.4305792 | 0.13536 | 0.9991 | -0.6063 | 0.04152 | 0.15175 | 7  | 54.7 | 0.06183 | 0.82433 | 0.9973 | -1.41   | #####  | 0.0004 | 4  |
| 1584 | P61224 | RAP1B     | Ras-related prot  | sp P61224 RAP1B_HUMAN | 3  | 19   | -0.046205 | 0.85969 | 0.9991 | -0.0657 | 0.85883 | 0.92074 | 8  | 42.9 | -0.0873 | 0.73887 | 0.9973 | -1.1712 | 0.0004 | 0.0016 | 4  |
| 1585 | P61254 | RPL26     | 60S ribosomal p   | sp P61254 RL26_HUMAN  | 6  | 37.2 | 0.1749386 | 0.53461 | 0.9991 | 0.5506  | 0.06279 | 0.19963 | 7  | 37.9 | 0.01738 | 0.9505  | 0.9973 | -0.8586 | 0.0066 | 0.0154 | 5  |
| 1586 | P61619 | SEC61A1   | Protein transpor  | sp P61619 S61A1_HUMAN | 3  | 6.1  | -0.111437 | 0.78045 | 0.9984 | 1.5568  | 0.78045 | 0.99836 | 3  | 6.7  | NA      | NA      | NA     | NA      | NA     | NA     | NA |
| 1587 | P61956 | SUMO2     | Small ubiquitin-r | sp P61956 SUMO2_HUMA  | 2  | 23.2 | -0.525962 | 0.1171  | 0.9991 | -0.0464 | 0.88564 | 0.9344  | 2  | 23.2 | 0.04382 | 0.89205 | 0.9973 | -0.7126 | 0.0392 | 0.0705 | 4  |
| 1588 | P63167 | DYNLL1    | Dynein light cha  | sp P63167 DYL1_HUMAN  | 2  | 37.1 | -0.11552  | 0.86816 | 0.9984 | 0.1762  | 0.86816 | 0.99836 | 3  | 44.9 | NA      | NA      | NA     | NA      | NA     | NA     | NA |
| 1589 | P63241 | EIF5A     | Eukaryotic trans  | sp P63241 IF5A1_HUMAN | 7  | 69.5 | 0.2089738 | 0.3078  | 0.9991 | -0.464  | 0.03245 | 0.12854 | 13 | 88.3 | 0.15636 | 0.44218 | 0.9973 | 0.15244 | 0.4535 | 0.545  | 3  |
| 1590 | P68133 | ACTA1     | Actin, alpha ske  | sp P68133 ACTS_HUMAN  | 17 | 38.7 | -0.463123 | 0.1921  | 0.9991 | -0.1178 | 0.76036 | 0.87233 | 14 | 32.4 | 0.175   | 0.61349 | 0.9973 | 0.04704 | 0.8916 | 0.9082 | NA |
| 1591 | P68104 | EEF1A1    | Elongation facto  | sp P68104 EF1A1_HUMAN | 30 | 61.7 | -0.152417 | 0.43746 | 0.9991 | -0.9618 | 0.00012 | 0.00755 | 28 | 72.5 | 0.00427 | 0.98246 | 0.9973 | -0.2412 | 0.2255 | 0.3087 | 3  |
| 1592 | P68400 | CSNK2A1   | Casein kinase II  | sp P68400 CSK21_HUMAN | 2  | 7.2  | -0.70289  | NA      | NA     | NA      | NA      | NA      | 7  | 27.4 | 0.11216 | 0.71479 | 0.9991 | -0.1714 | 0.7148 | 0.9991 | NA |
| 1593 | P69849 | NOMO3     | Nodal modulator   | sp P69849 NOMO3_HUMA  | 12 | 13.5 | 0.0806778 | 0.77697 | 0.9991 | 0.4178  | 0.15486 | 0.32873 | 9  | 9.3  | -0.0468 | 0.86926 | 0.9973 | -1.0974 | 0.0012 | 0.0037 | 5  |
| 1594 | Q01105 | SET       | Protein SET       | sp Q01105 SET_HUMAN   | 5  | 24.1 | 0.325981  | 0.18646 | 0.9991 | -0.2684 | 0.27259 | 0.4737  | 7  | 33.8 | -0.0521 | 0.82839 | 0.9973 | 1.16687 | 0.0001 | 0.0006 | 2  |
| 1595 | Q14671 | PUM1      | Pumilio homolog   | sp Q14671 PUM1_HUMAN  | 4  | 3.9  | -0.117559 | NA      | NA     | NA      | NA      | NA      | 4  | 5.1  | NA      | NA      | NA     | NA      | NA     | NA     | NA |
| 1596 | Q9H8S9 | MOB1A     | MOB kinase acti   | sp Q9H8S9 MOB1A_HUMA  | 2  | 11.6 | 0.101086  | NA      | NA     | NA      | NA      | NA      | 3  | 16.7 | 0.20128 | NA      | NA     | NA      | NA     | NA     | NA |
| 1597 | Q8N0W4 | NLGN4X    | Neuroigin-4, X-l  | sp Q8N0W4 NLGNX_HUMA  | 3  | 5.6  | -0.244938 | 0.45613 | 0.9984 | 0.5045  | 0.45613 | 0.99836 | NA | NA   | NA      | NA      | NA     | NA      | NA     | NA     | NA |
| 1598 | Q93008 | USP9X     | Probable ubiquit  | sp Q93008 USP9X_HUMAN | 11 | 5.8  | 0.3550563 | 0.1272  | 0.9984 | -0.112  | 0.1272  | 0.99836 | 5  | 2.8  | NA      | NA      | NA     | NA      | NA     | NA     | NA |
| 1599 | Q99961 | SH3GL1    | Endophilin-A2     | sp Q99961 SH3G1_HUMA  | 4  | 13.9 | -0.203203 | NA      | NA     | NA      | NA      | NA      | 12 | 42.9 | NA      | NA      | NA     | NA      | NA     | NA     | NA |
| 1600 | Q9BWF3 | RBM4      | RNA-binding pro   | sp Q9BWF3 RBM4_HUMA   | 7  | 25.8 | -0.084428 | 0.75078 | 0.9984 | 0.6208  | 0.75078 | 0.99836 | 11 | 34.6 | NA      | NA      | NA     | 2.5035  | NA     | NA     | NA |
| 1601 | Q9H0U4 | RAB1B     | Ras-related prot  | sp Q9H0U4 RAB1B_HUMA  | 7  | 48.3 | -0.017143 | 0.96045 | 0.999  | 0.4514  | 0.96045 | 0.99899 | 10 | 58.7 | NA      | NA      | NA     | NA      | NA     | NA     | NA |
| 1602 | Q9NUU7 | DDX19A    | ATP-dependent     | sp Q9NUU7 DD19A_HUMA  | 7  | 16.7 | 0.403169  | NA      | NA     | NA      | NA      | NA      | 8  | 20.3 | -0.2489 | 0.3926  | 0.9991 | -0.0358 | 0.3926 | 0.9991 | NA |
| 1603 | Q9P289 | STK26     | Serine/threonin   | sp Q9P289 STK26_HUMAN | 5  | 14.4 | 0.0275134 | 0.88793 | 0.9984 | -0.294  | 0.88793 | 0.99836 | 4  | 12.7 | NA      | NA      | NA     | NA      | NA     | NA     | NA |
| 1604 | Q9UQN3 | CHMP2B    | Charged multive   | sp Q9UQN3 CHM2B_HUMA  | 2  | 7.5  | 0.1189147 | 0.80464 | 0.9984 | 0.133   | 0.80464 | 0.99836 | 1  | 0    | NA      | NA      | NA     | NA      | NA     | NA     | NA |
| 1605 | Q9Y605 | MRFAP1    | MORF4 family-a    | sp Q9Y605 MOFA1_HUMA  | 2  | 28.3 | 0.1223033 | 0.76664 | 0.9984 | 0.3327  | 0.76664 | 0.99836 | 2  | 26.8 | NA      | NA      | NA     | NA      | NA     | NA     | NA |
| 1606 | P11940 | PABPC1    | Polyadenylate-b   | sp P11940 PABP1_HUMAN | 22 | 44   | NA        | NA      | NA     | NA      | NA      | NA      | 27 | 51.6 | 0.07752 | 0.70086 | 0.9991 | -0.3842 | 0.7009 | 0.9991 | NA |
| 1607 | P35321 | SPRR1A    | Cornifin-A        | sp P35321 SPR1A_HUMAN | NA | NA   | NA        | NA      | NA     | NA      | NA      | NA      | 2  | 27   | 1.02267 | NA      | NA     | NA      | NA     | NA     | NA |
| 1608 | Q9NRH3 | TUBG2     | Tubulin gamma-    | sp Q9NRH3 TBG2_HUMAN  | NA | NA   | NA        | NA      | NA     | NA      | NA      | NA      | 4  | 14   | 0.29631 | 0.57544 | 0.9991 | 0.55774 | 0.5754 | 0.9991 | NA |
| 1609 | P62701 | RPS4X     | 40S ribosomal p   | sp P62701 RS4X_HUMAN  | 4  | 14   | 52.1      | NA      | NA     | NA      | NA      | NA      | 16 | 55.1 | -0.0649 | 0.80303 | 0.9991 | -0.7743 | 0.803  | 0.9991 | NA |
| 1610 | P62854 | RPS26     | 40S ribosomal p   | sp P62854 RS26_HUMAN  | 4  | 1    | 13        | NA      | NA     | NA      | NA      | NA      | 3  | 27   | -0.9001 | 0.025   | 0.9991 | -0.0055 | 0.025  | 0.9991 | NA |
| 1611 | P62879 | GNB2      | Guanine nucleot   | sp P62879 GBB2_HUMAN  | 5  | 19.4 | NA        | NA      | NA     | NA      | NA      | NA      | 9  | 36.2 | -0.0123 | 0.96571 | 0.9991 | 0.63996 | 0.9657 | 0.9991 | NA |
| 1612 | P63165 | SUMO1     | Small ubiquitin-r | sp P63165 SUMO1_HUMA  | 4  | 35.6 | NA        | NA      | NA     | NA      | NA      | NA      | 4  | 36.6 | 0.65667 | 0.39626 | 0.9991 | 3.03838 | 0.3963 | 0.9991 | NA |
| 1613 | Q01130 | SRSF2     | Serine/arginine   | sp Q01130 SRSF2_HUMAN | 5  | 22.2 | NA        | NA      | NA     | NA      | NA      | NA      | 4  | 21.7 | -0.1121 | 0.77105 | 0.9991 | -0.6356 | 0.771  | 0.9991 | NA |
| 1614 | Q15052 | ARHGEF6   | Rho guanine nud   | sp Q15052 ARHG6_HUMA  | NA | NA   | NA        | NA      | NA     | NA      | NA      | NA      | 2  | 3    | NA      | NA      | NA     | -0.8735 | NA     | NA     | NA |
| 1615 | Q16777 | HIST2H2AC | Histone H2A typ   | sp Q16777 H2A2C_HUMA  | NA | NA   | NA        | NA      | NA     | NA      | NA      | NA      | 6  | 55   | 0.08528 | 0.81574 | 0.9991 | 2.37984 | 0.8157 | 0.9991 | NA |
| 1616 | Q9HB90 | RRAGC     | Ras-related GTP   | sp Q9HB90 RRAGC_HUMA  | NA | NA   | NA        | NA      | NA     | NA      | NA      | NA      | 5  | 14.3 | -0.0068 | NA      | NA     | NA      | NA     | NA     | NA |
