# Supplementary material for: Hyperosmotic Stress Induces a Specific Pattern for Stress Granule Formation in Human-Induced Pluripotent Stem Cells
Source: Stem Cells Int. 2021 Oct 15;2021:8274936. doi: 10.1155/2021/8274936 (PMC8538399; doi:10.1155/2021/8274936)
Supplement: Supplementary 1 — Supplementary Tables—Table S1: LC-MS/MS parameters. Table 2: list of identified proteins—mass spectrometry-based protein quantitation. Table S3: data summary of all quantified proteins in hiPSCs/IMR90-1 and SH-SY5Y. Supplementary Table S4: data summary of overlapped proteins between hiPSCs/IMR90-1 and SH-SY5Y. Supplementary Table S5: top networks in hiPSCs/IMR90-01 and SH-SY5Y. [file 8274936.f1.zip]

Archive with 2 entries (2 files):
- Supplementary Table 2_v2 (1).pdf
- Supplementary Tables  (2).docx
